# Supplementary material for: Mycobacterium avium subsp. paratuberculosis Infected Cows Reveal Divergent Immune Response in Bovine Peripheral Blood Derived Lymphocyte Proteome
Source: MDPI journal article supplement (doi:10.3390/metabo12100924), 2022-09-29
Supplement: s1 [file s1]

**Table S4. Selection of proteins with different abundance in persistently MAP-infected cows after 48-h incubation with MAP *in vitro*.** (a) Protein names as listed in Ensembl Protein Database v.93 (<http://www.ensembl.org>). (b) Gene names of *Bos taurus* (cow) (c) Protein accession numbers as listed in Ensembl database for cows v.93. (d) Fold change in protein abundance differences in persistently MAP-infected cows compared to MAP-resistant (Up in persistently MAP-infected cows). Name of gene as listed in UniProtKB. (e) Statistical significance of differences in protein abundance determined by Student's t-test. Genes upregulated in persistently MAP-infected cows: *Bos taurus* potassium large conductance calcium-activated channel, subfamily M, alpha member 1 (KCNMA1) and *Bos taurus* integrin, alpha 2b (ITGA2B).

| (a)                                                                                                  | (b)           | (c)              | (d)   | (e)     |
|------------------------------------------------------------------------------------------------------|---------------|------------------|-------|---------|
| Protein name                                                                                         | Gene name     | Accession number | Ratio | p-value |
| <b>Increase in persistently MAP-infected cows.</b>                                                   |               |                  |       |         |
| Bos taurus potassium channel with large conductance, calcium-activated, subfamily M, alpha member 1. | <i>KCNMA1</i> | ENSBTAP000017697 | 15.2  | 0.004   |
| Bos taurus integrin, alpha 2b                                                                        | <i>ITGA2B</i> | ENSBTAP000010741 | 2.2   | 0.047   |
