# Supplementary material for: Mycobacterium avium subsp. paratuberculosis Infected Cows Reveal Divergent Immune Response in Bovine Peripheral Blood Derived Lymphocyte Proteome
Source: MDPI journal article supplement (doi:10.3390/metabo12100924), 2022-09-29
Supplement: s1 [file s1]

**Table S3. Selection of proteins with different abundance in MAP resistant cows after 48-h incubation with MAP *in vitro*.** (a) Protein names as listed in Ensembl Protein Database v.93 (<http://www.ensembl.org>). (b) Gene names of *Bos taurus* (cow) (c) Protein accession numbers as listed in Ensembl database for cows v.93. (d) Fold change of differences in protein abundance in MAP-resistant compared to persistently MAP-infected cows (Up in MAP-resistant). Name of gene as listed in UniProtKB. (e) Statistical significance of differences in protein abundance determined by Student's t-test. Up-regulated genes in MAP-resistant: *Bos taurus* Toll-like receptor 2 (TLR2), *Bos taurus* major histocompatibility complex, class II, DRB3 (BOLA-DRB3), and *Bos taurus* major histocompatibility complex, class II, DR alpha (BOLA-DRA).

| (a)<br>Protein name                                                    | (b)<br>Gene name | (c)<br>Accession number | (d)<br>Ratio | (e)<br>p-value |
|------------------------------------------------------------------------|------------------|-------------------------|--------------|----------------|
| <b>Upward in MAP Resistant</b>                                         |                  |                         |              |                |
| <i>Bos taurus</i> Toll-like receptor 2                                 | <i>TLR2</i>      | ENSBTAP0000010530       | 2.5          | 0.012          |
| <i>Bos taurus</i> major histocompatibility complex, class II, DRB3.    | <i>BOLA-DRB3</i> | ENSBTAP0000018484       | 2.5          | 0.017          |
| <i>Bos taurus</i> major histocompatibility complex, class II, DR alpha | <i>BOLA-DRA</i>  | ENSBTAP00000014072      | 1.4          | 0.044          |
