# Supplementary material for: Mycobacterium avium subsp. paratuberculosis Infected Cows Reveal Divergent Immune Response in Bovine Peripheral Blood Derived Lymphocyte Proteome
Source: Metabolites. 2022 Sep 29;12(10):924. doi: 10.3390/metabo12100924 (PMC9608910; doi:10.3390/metabo12100924)
Supplement: Supplementary file 1 [file metabolites-12-00924-s001.zip]

Archive with 5 entries (5 files):
- Supplementary Table S1_Korbonits et al.xlsx
- Supplementary Table S2_Korbonits et al.xlsx
- Supplementary Table S3_Korbonits et al.pdf
- Supplementary Table S4_Korbonits et al.pdf
- Supplementary Table S5_Korbonits et al.xlsx
