# Supplementary material for: Mycobacterium avium subsp. paratuberculosis Infected Cows Reveal Divergent Immune Response in Bovine Peripheral Blood Derived Lymphocyte Proteome
Source: Metabolites. 2022 Sep 29;12(10):924. doi: 10.3390/metabo12100924 (PMC9608910; doi:10.3390/metabo12100924)
Supplement: Supplementary file 1 [file metabolites-12-00924-s001.zip › Supplementary Table S1_Korbonits et al.xlsx]

## Sheet: Supplementary Table 1_Korbonits
Enrichment FDR	nGenes	Pathway Genes	Fold Enrichment	Pathway	URL	Genes	Enrichment FDR,"nGenes","Pathway Genes","Fold Enrichment","Pathway","URL","Genes"
0.0207536497542419	5	214	159615946261682	Epstein-Barr virus infection	http://www.genome.jp/kegg-bin/show_pathway?bta05169	DDX58 TLR2 BOLA-DRA BAX	0.0207536497542419,5,214,15.9615946261682,"Epstein-Barr virus infection","http://www.genome.jp/kegg-bin/show_pathway?bta05169 "," DDX58 TLR2 BOLA-DRA BAX "
0.0231419473741897	2	12	113859375	Ammonium ion metabolic process	http://amigo.geneontology.org/amigo/term/GO:0097164	HNMT RNF180	0.0231419473741897,2,12,113.859375,"Ammonium ion metabolic process "," http://amigo.geneontology.org/amigo/term/GO:0097164"," HNMT RNF180"
0.0231419473741897	4	160	1707890625	Phagosome	http://www.genome.jp/kegg-bin/show_pathway?bta04145	TLR2 BOLA-DRA DYNC1H1	0.0231419473741897,4,160,17.07890625,"Phagosome","http://www.genome.jp/kegg-bin/show_pathway?bta04145 "," TLR2 BOLA-DRA DYNC1H1"
0.0231419473741897	3	54	37953125	Type I diabetes mellitus	http://www.genome.jp/kegg-bin/show_pathway?bta04940	ICA1 BOLA-DRA	0.0231419473741897,3,54,37.953125,"Type I diabetes mellitus","http://www.genome.jp/kegg-bin/show_pathway?bta04940 "," ICA1 BOLA-DRA "
0.0231419473741897	4	182	150144230769231	Tuberculosis	http://www.genome.jp/kegg-bin/show_pathway?bta05152	TLR2 BOLA-DRA BAX	0.0231419473741897,4,182,15.0144230769231,"Tuberculosis","http://www.genome.jp/kegg-bin/show_pathway?bta05152 "," TLR2 BOLA-DRA BAX "
0.0231419473741897	4	170	160742647058824	Influenza A	http://www.genome.jp/kegg-bin/show_pathway?bta05164	DDX58 BOLA-DRA BAX	0.0231419473741897,4,170,16.0742647058824,"Influenza A","http://www.genome.jp/kegg-bin/show_pathway?bta05164 "," DDX58 BOLA-DRA BAX "
0.0231419473741897	5	298	114623531879195	Herpes simplex virus 1 infection	http://www.genome.jp/kegg-bin/show_pathway?bta05168	DDX58 TLR2 BOLA-DRA BAX	0.0231419473741897,5,298,11.4623531879195,"Herpes simplex virus 1 infection","http://www.genome.jp/kegg-bin/show_pathway?bta05168 "," DDX58 TLR2 BOLA-DRA BAX "
0.0231419473741897	3	69	297024456521739	Inflammatory bowel disease	http://www.genome.jp/kegg-bin/show_pathway?bta05321	TLR2 BOLA-DRA	0.0231419473741897,3,69,29.7024456521739,"Inflammatory bowel disease","http://www.genome.jp/kegg-bin/show_pathway?bta05321 "," TLR2 BOLA-DRA "
0.0231419473741897	3	69	297024456521739	Viral myocarditis	http://www.genome.jp/kegg-bin/show_pathway?bta05416	BOLA-DRA EIF4G1	0.0231419473741897,3,69,29.7024456521739,"Viral myocarditis","http://www.genome.jp/kegg-bin/show_pathway?bta05416 "," BOLA-DRA EIF4G1 "
0.025229192470055	3	76	269666940789474	TCR signaling	https://reactome.org/download/current	CUL1 BOLA-DRA	0.025229192470055,3,76,26.9666940789474,"TCR signaling","https://reactome.org/download/current"," CUL1 BOLA-DRA "
0.025229192470055	3	75	2732625	Leishmaniasis	http://www.genome.jp/kegg-bin/show_pathway?bta05140	TLR2 BOLA-DRA	0.025229192470055,3,75,27.32625,"Leishmaniasis","http://www.genome.jp/kegg-bin/show_pathway?bta05140 "," TLR2 BOLA-DRA "
0.0336337951758485	6	641	639459828393136	Protein ubiquitination	http://amigo.geneontology.org/amigo/term/GO:0016567	WDR48 TULP4 UBA6 CUL1 KCMF1 RNF180	0.0336337951758485,6,641,6.39459828393136,"Protein ubiquitination "," http://amigo.geneontology.org/amigo/term/GO:0016567"," WDR48 TULP4 UBA6 CUL1 KCMF1 RNF180"
0.0336337951758485	2	17	803713235294118	MHC class II protein complex	http://amigo.geneontology.org/amigo/term/GO:0042613	BOLA-DRA	0.0336337951758485,2,17,80.3713235294118,"MHC class II protein complex "," http://amigo.geneontology.org/amigo/term/GO:0042613"," BOLA-DRA "
0.03719563438545	2	19	719111842105263	MHC protein complex	http://amigo.geneontology.org/amigo/term/GO:0042611	BOLA-DRA	0.03719563438545,2,19,71.9111842105263,"MHC protein complex "," http://amigo.geneontology.org/amigo/term/GO:0042611"," BOLA-DRA "
0.0391633407196001	3	98	209129464285714	Rheumatoid arthritis	http://www.genome.jp/kegg-bin/show_pathway?bta05323	TLR2 BOLA-DRA	0.0391633407196001,3,98,20.9129464285714,"Rheumatoid arthritis","http://www.genome.jp/kegg-bin/show_pathway?bta05323 "," TLR2 BOLA-DRA "
0.0430409000471765	6	698	587240329512894	Protein modification by small protein conjugation	http://amigo.geneontology.org/amigo/term/GO:0032446	WDR48 TULP4 UBA6 CUL1 KCMF1 RNF180	0.0430409000471765,6,698,5.87240329512894,"Protein modification by small protein conjugation "," http://amigo.geneontology.org/amigo/term/GO:0032446"," WDR48 TULP4 UBA6 CUL1 KCMF1 RNF180"
0.0456928258016493	8	1348	405433976261128	Metabolism of proteins	https://reactome.org/download/current	DDX58 TULP4 UBA6 CUL1 SEC11C EIF4G1 RPL35A DYNC1H1	0.0456928258016493,8,1348,4.05433976261128,"Metabolism of proteins","https://reactome.org/download/current"," DDX58 TULP4 UBA6 CUL1 SEC11C EIF4G1 RPL35A DYNC1H1"
0.0456928258016493	3	112	18298828125	WP1006 Metapathway biotransformation	http://www.wikipathways.org/instance/WP1006_r80841	GSTO1 HNMT NAT10	0.0456928258016493,3,112,18.298828125,"WP1006 Metapathway biotransformation","http://www.wikipathways.org/instance/WP1006_r80841"," GSTO1 HNMT NAT10"
0.0456928258016493	3	111	184636824324324	Toxoplasmosis	http://www.genome.jp/kegg-bin/show_pathway?bta05145	TLR2 BOLA-DRA	0.0456928258016493,3,111,18.4636824324324,"Toxoplasmosis","http://www.genome.jp/kegg-bin/show_pathway?bta05145 "," TLR2 BOLA-DRA "
0.0491698578396939	2	26	525504807692308	Antigen processing and presentation of peptide or polysaccharide antigen via MHC class II	http://amigo.geneontology.org/amigo/term/GO:0002504	BOLA-DRA	0.0491698578396939,2,26,52.5504807692308,"Antigen processing and presentation of peptide or polysaccharide antigen via MHC class II "," http://amigo.geneontology.org/amigo/term/GO:0002504"," BOLA-DRA "
0.058339419829049	2	29	47114224137931	ISG15 antiviral mechanism	https://reactome.org/download/current	DDX58 EIF4G1	0.058339419829049,2,29,47.114224137931,"ISG15 antiviral mechanism","https://reactome.org/download/current"," DDX58 EIF4G1"
0.0593685795993397	7	1097	43592468094804	RNA binding	http://amigo.geneontology.org/amigo/term/GO:0003723	DDX58 CHTOP KRR1 EIF4G1 RPL35A NAT10 YBX1	0.0593685795993397,7,1097,4.3592468094804,"RNA binding "," http://amigo.geneontology.org/amigo/term/GO:0003723"," DDX58 CHTOP KRR1 EIF4G1 RPL35A NAT10 YBX1"
0.0598524788342765	2	31	440745967741936	Translocation of ZAP-70 to Immunological synapse	https://reactome.org/download/current	BOLA-DRA	0.0598524788342765,2,31,44.0745967741936,"Translocation of ZAP-70 to Immunological synapse","https://reactome.org/download/current"," BOLA-DRA "
0.0598524788342765	6	803	51045298879203	Positive regulation of gene expression	http://amigo.geneontology.org/amigo/term/GO:0010628	DDX58 TLR2 ZMIZ2 EIF4G1 NAT10 YBX1	0.0598524788342765,6,803,5.1045298879203,"Positive regulation of gene expression "," http://amigo.geneontology.org/amigo/term/GO:0010628"," DDX58 TLR2 ZMIZ2 EIF4G1 NAT10 YBX1"
0.0610561524465056	2	33	414034090909091	Antiviral mechanism by IFN-stimulated genes	https://reactome.org/download/current	DDX58 EIF4G1	0.0610561524465056,2,33,41.4034090909091,"Antiviral mechanism by IFN-stimulated genes","https://reactome.org/download/current"," DDX58 EIF4G1"
0.0610561524465056	6	815	502937116564417	Protein modification by small protein conjugation or removal	http://amigo.geneontology.org/amigo/term/GO:0070647	WDR48 TULP4 UBA6 CUL1 KCMF1 RNF180	0.0610561524465056,6,815,5.02937116564417,"Protein modification by small protein conjugation or removal "," http://amigo.geneontology.org/amigo/term/GO:0070647"," WDR48 TULP4 UBA6 CUL1 KCMF1 RNF180"
0.0615736311808708	2	35	390375	Phosphorylation of CD3 and TCR zeta chains	https://reactome.org/download/current	BOLA-DRA	0.0615736311808708,2,35,39.0375,"Phosphorylation of CD3 and TCR zeta chains","https://reactome.org/download/current"," BOLA-DRA "
0.0615736311808708	3	142	144328785211268	Measles	http://www.genome.jp/kegg-bin/show_pathway?bta05162	DDX58 TLR2 BAX	0.0615736311808708,3,142,14.4328785211268,"Measles","http://www.genome.jp/kegg-bin/show_pathway?bta05162 "," DDX58 TLR2 BAX"
0.0615736311808708	2	34	401856617647059	Asthma	http://www.genome.jp/kegg-bin/show_pathway?bta05310	BOLA-DRA	0.0615736311808708,2,34,40.1856617647059,"Asthma","http://www.genome.jp/kegg-bin/show_pathway?bta05310 "," BOLA-DRA "
0.0629649135286582	2	36	37953125	PD-1 signaling	https://reactome.org/download/current	BOLA-DRA	0.0629649135286582,2,36,37.953125,"PD-1 signaling","https://reactome.org/download/current"," BOLA-DRA "
0.0787864326277328	2	41	333246951219512	Antigen binding	http://amigo.geneontology.org/amigo/term/GO:0003823	BOLA-DRA CD48	0.0787864326277328,2,41,33.3246951219512,"Antigen binding "," http://amigo.geneontology.org/amigo/term/GO:0003823"," BOLA-DRA CD48"
0.0787864326277328	3	162	126510416666667	Hepatitis B	http://www.genome.jp/kegg-bin/show_pathway?bta05161	DDX58 TLR2 BAX	0.0787864326277328,3,162,12.6510416666667,"Hepatitis B","http://www.genome.jp/kegg-bin/show_pathway?bta05161 "," DDX58 TLR2 BAX"
0.0815227202930456	2	43	317747093023256	Generation of second messenger molecules	https://reactome.org/download/current	BOLA-DRA	0.0815227202930456,2,43,31.7747093023256,"Generation of second messenger molecules","https://reactome.org/download/current"," BOLA-DRA "
0.0967296792613771	7	1509	316904821073559	Immune System	https://reactome.org/download/current	DDX58 UBA6 CUL1 BOLA-DRA EIF4G1 DYNC1H1	0.0967296792613771,7,1509,3.16904821073559,"Immune System","https://reactome.org/download/current"," DDX58 UBA6 CUL1 BOLA-DRA EIF4G1 DYNC1H1"
0.0967296792613771	4	495	552045454545455	Metabolism of RNA	https://reactome.org/download/current	CHTOP KRR1 EIF4G1 RPL35A	0.0967296792613771,4,495,5.52045454545455,"Metabolism of RNA","https://reactome.org/download/current"," CHTOP KRR1 EIF4G1 RPL35A"
0.0967296792613771	2	66	207017045454545	Costimulation by the CD28 family	https://reactome.org/download/current	BOLA-DRA	0.0967296792613771,2,66,20.7017045454545,"Costimulation by the CD28 family","https://reactome.org/download/current"," BOLA-DRA "
0.0967296792613771	2	64	213486328125	Interferon Signaling	https://reactome.org/download/current	DDX58 EIF4G1	0.0967296792613771,2,64,21.3486328125,"Interferon Signaling","https://reactome.org/download/current"," DDX58 EIF4G1"
0.0967296792613771	1	4	1707890625	Release of apoptotic factors from the mitochondria	https://reactome.org/download/current	BAX	0.0967296792613771,1,4,170.7890625,"Release of apoptotic factors from the mitochondria","https://reactome.org/download/current"," BAX"
0.0967296792613771	2	52	262752403846154	MHC class II antigen presentation	https://reactome.org/download/current	BOLA-DRA	0.0967296792613771,2,52,26.2752403846154,"MHC class II antigen presentation","https://reactome.org/download/current"," BOLA-DRA "
0.0967296792613771	2	74	184636824324324	Regulation of PLK1 Activity at G2/M Transition	https://reactome.org/download/current	CUL1 DYNC1H1	0.0967296792613771,2,74,18.4636824324324,"Regulation of PLK1 Activity at G2/M Transition","https://reactome.org/download/current"," CUL1 DYNC1H1"
0.0967296792613771	1	3	22771875	Histamine metabolic process	http://amigo.geneontology.org/amigo/term/GO:0001692	HNMT	0.0967296792613771,1,3,227.71875,"Histamine metabolic process "," http://amigo.geneontology.org/amigo/term/GO:0001692"," HNMT"
0.0967296792613771	1	4	1707890625	Myeloid dendritic cell cytokine production	http://amigo.geneontology.org/amigo/term/GO:0002372	DDX58	0.0967296792613771,1,4,170.7890625,"Myeloid dendritic cell cytokine production "," http://amigo.geneontology.org/amigo/term/GO:0002372"," DDX58"
0.0967296792613771	1	4	1707890625	Peptide antigen assembly with MHC protein complex	http://amigo.geneontology.org/amigo/term/GO:0002501	BOLA-DRA	0.0967296792613771,1,4,170.7890625,"Peptide antigen assembly with MHC protein complex "," http://amigo.geneontology.org/amigo/term/GO:0002501"," BOLA-DRA"
0.0967296792613771	1	4	1707890625	Regulation of myeloid dendritic cell cytokine production	http://amigo.geneontology.org/amigo/term/GO:0002733	DDX58	0.0967296792613771,1,4,170.7890625,"Regulation of myeloid dendritic cell cytokine production "," http://amigo.geneontology.org/amigo/term/GO:0002733"," DDX58"
0.0967296792613771	1	4	1707890625	Positive regulation of myeloid dendritic cell cytokine production	http://amigo.geneontology.org/amigo/term/GO:0002735	DDX58	0.0967296792613771,1,4,170.7890625,"Positive regulation of myeloid dendritic cell cytokine production "," http://amigo.geneontology.org/amigo/term/GO:0002735"," DDX58"
0.0967296792613771	2	62	220372983870968	Cellular biogenic amine metabolic process	http://amigo.geneontology.org/amigo/term/GO:0006576	HNMT RNF180	0.0967296792613771,2,62,22.0372983870968,"Cellular biogenic amine metabolic process "," http://amigo.geneontology.org/amigo/term/GO:0006576"," HNMT RNF180"
0.0967296792613771	2	75	182175	Amine metabolic process	http://amigo.geneontology.org/amigo/term/GO:0009308	HNMT RNF180	0.0967296792613771,2,75,18.2175,"Amine metabolic process "," http://amigo.geneontology.org/amigo/term/GO:0009308"," HNMT RNF180"
0.0967296792613771	1	3	22771875	Heat acclimation	http://amigo.geneontology.org/amigo/term/GO:0010286	HSBP1	0.0967296792613771,1,3,227.71875,"Heat acclimation "," http://amigo.geneontology.org/amigo/term/GO:0010286"," HSBP1"
0.0967296792613771	1	4	1707890625	Amygdala development	http://amigo.geneontology.org/amigo/term/GO:0021764	UBA6	0.0967296792613771,1,4,170.7890625,"Amygdala development "," http://amigo.geneontology.org/amigo/term/GO:0021764"," UBA6"
0.0967296792613771	1	4	1707890625	Response to bacterial lipoprotein	http://amigo.geneontology.org/amigo/term/GO:0032493	TLR2	0.0967296792613771,1,4,170.7890625,"Response to bacterial lipoprotein "," http://amigo.geneontology.org/amigo/term/GO:0032493"," TLR2"
0.0967296792613771	1	3	22771875	Regulation of CD4-positive, CD25-positive, alpha-beta regulatory T cell differentiation	http://amigo.geneontology.org/amigo/term/GO:0032829	BOLA-DRA	0.0967296792613771,1,3,227.71875,"Regulation of CD4-positive, CD25-positive, alpha-beta regulatory T cell differentiation "," http://amigo.geneontology.org/amigo/term/GO:0032829"," BOLA-DRA"
0.0967296792613771	1	3	22771875	Positive regulation of CD4-positive, CD25-positive, alpha-beta regulatory T cell differentiation	http://amigo.geneontology.org/amigo/term/GO:0032831	BOLA-DRA	0.0967296792613771,1,3,227.71875,"Positive regulation of CD4-positive, CD25-positive, alpha-beta regulatory T cell differentiation "," http://amigo.geneontology.org/amigo/term/GO:0032831"," BOLA-DRA"
0.0967296792613771	1	4	1707890625	Positive regulation of translation in response to endoplasmic reticulum stress	http://amigo.geneontology.org/amigo/term/GO:0036493	EIF4G1	0.0967296792613771,1,4,170.7890625,"Positive regulation of translation in response to endoplasmic reticulum stress "," http://amigo.geneontology.org/amigo/term/GO:0036493"," EIF4G1"
0.0967296792613771	1	3	22771875	Detection of bacterial lipoprotein	http://amigo.geneontology.org/amigo/term/GO:0042494	TLR2	0.0967296792613771,1,3,227.71875,"Detection of bacterial lipoprotein "," http://amigo.geneontology.org/amigo/term/GO:0042494"," TLR2"
0.0967296792613771	1	3	22771875	Positive regulation of memory T cell differentiation	http://amigo.geneontology.org/amigo/term/GO:0043382	BOLA-DRA	0.0967296792613771,1,3,227.71875,"Positive regulation of memory T cell differentiation "," http://amigo.geneontology.org/amigo/term/GO:0043382"," BOLA-DRA"
0.0967296792613771	2	70	1951875	Cellular amine metabolic process	http://amigo.geneontology.org/amigo/term/GO:0044106	HNMT RNF180	0.0967296792613771,2,70,19.51875,"Cellular amine metabolic process "," http://amigo.geneontology.org/amigo/term/GO:0044106"," HNMT RNF180"
0.0967296792613771	1	3	22771875	Imidazole-containing compound metabolic process	http://amigo.geneontology.org/amigo/term/GO:0052803	HNMT	0.0967296792613771,1,3,227.71875,"Imidazole-containing compound metabolic process "," http://amigo.geneontology.org/amigo/term/GO:0052803"," HNMT"
0.0967296792613771	1	3	22771875	Response to bacterial lipopeptide	http://amigo.geneontology.org/amigo/term/GO:0070339	TLR2	0.0967296792613771,1,3,227.71875,"Response to bacterial lipopeptide "," http://amigo.geneontology.org/amigo/term/GO:0070339"," TLR2"
0.0967296792613771	1	3	22771875	Cellular heat acclimation	http://amigo.geneontology.org/amigo/term/GO:0070370	HSBP1	0.0967296792613771,1,3,227.71875,"Cellular heat acclimation "," http://amigo.geneontology.org/amigo/term/GO:0070370"," HSBP1"
0.0967296792613771	1	3	22771875	Cellular response to bacterial lipoprotein	http://amigo.geneontology.org/amigo/term/GO:0071220	TLR2	0.0967296792613771,1,3,227.71875,"Cellular response to bacterial lipoprotein "," http://amigo.geneontology.org/amigo/term/GO:0071220"," TLR2"
0.0967296792613771	1	3	22771875	Cellular response to bacterial lipopeptide	http://amigo.geneontology.org/amigo/term/GO:0071221	TLR2	0.0967296792613771,1,3,227.71875,"Cellular response to bacterial lipopeptide "," http://amigo.geneontology.org/amigo/term/GO:0071221"," TLR2"
0.0967296792613771	1	3	22771875	Response to diacyl bacterial lipopeptide	http://amigo.geneontology.org/amigo/term/GO:0071724	TLR2	0.0967296792613771,1,3,227.71875,"Response to diacyl bacterial lipopeptide "," http://amigo.geneontology.org/amigo/term/GO:0071724"," TLR2"
0.0967296792613771	1	3	22771875	Cellular response to diacyl bacterial lipopeptide	http://amigo.geneontology.org/amigo/term/GO:0071726	TLR2	0.0967296792613771,1,3,227.71875,"Cellular response to diacyl bacterial lipopeptide "," http://amigo.geneontology.org/amigo/term/GO:0071726"," TLR2"
0.0967296792613771	2	72	189765625	Cellular response to toxic substance	http://amigo.geneontology.org/amigo/term/GO:0097237	GSTO1 HP	0.0967296792613771,2,72,18.9765625,"Cellular response to toxic substance "," http://amigo.geneontology.org/amigo/term/GO:0097237"," GSTO1 HP"
0.0967296792613771	2	78	175168269230769	Detoxification	http://amigo.geneontology.org/amigo/term/GO:0098754	GSTO1 HP	0.0967296792613771,2,78,17.5168269230769,"Detoxification "," http://amigo.geneontology.org/amigo/term/GO:0098754"," GSTO1 HP"
0.0967296792613771	2	55	248420454545455	Cellular oxidant detoxification	http://amigo.geneontology.org/amigo/term/GO:0098869	GSTO1 HP	0.0967296792613771,2,55,24.8420454545455,"Cellular oxidant detoxification "," http://amigo.geneontology.org/amigo/term/GO:0098869"," GSTO1 HP"
0.0967296792613771	1	4	1707890625	Positive regulation of spindle assembly	http://amigo.geneontology.org/amigo/term/GO:1905832	DYNC1H1	0.0967296792613771,1,4,170.7890625,"Positive regulation of spindle assembly "," http://amigo.geneontology.org/amigo/term/GO:1905832"," DYNC1H1"
0.0967296792613771	1	3	22771875	MiRNA transport	http://amigo.geneontology.org/amigo/term/GO:1990428	YBX1	0.0967296792613771,1,3,227.71875,"MiRNA transport "," http://amigo.geneontology.org/amigo/term/GO:1990428"," YBX1"
0.0967296792613771	2	67	20392723880597	Cellular detoxification	http://amigo.geneontology.org/amigo/term/GO:1990748	GSTO1 HP	0.0967296792613771,2,67,20.392723880597,"Cellular detoxification "," http://amigo.geneontology.org/amigo/term/GO:1990748"," GSTO1 HP"
0.0967296792613771	1	4	1707890625	Histone pre-mRNA 3 end processing complex	http://amigo.geneontology.org/amigo/term/GO:0071204	YBX1	0.0967296792613771,1,4,170.7890625,"Histone pre-mRNA 3 end processing complex "," http://amigo.geneontology.org/amigo/term/GO:0071204"," YBX1"
0.0967296792613771	2	53	257794811320755	TRNA binding	http://amigo.geneontology.org/amigo/term/GO:0000049	RPL35A NAT10	0.0967296792613771,2,53,25.7794811320755,"TRNA binding "," http://amigo.geneontology.org/amigo/term/GO:0000049"," RPL35A NAT10"
0.0967296792613771	1	4	1707890625	Glutathione disulfide oxidoreductase activity	http://amigo.geneontology.org/amigo/term/GO:0015038	GSTO1	0.0967296792613771,1,4,170.7890625,"Glutathione disulfide oxidoreductase activity "," http://amigo.geneontology.org/amigo/term/GO:0015038"," GSTO1"
0.0967296792613771	2	69	198016304347826	Antioxidant activity	http://amigo.geneontology.org/amigo/term/GO:0016209	GSTO1 HP	0.0967296792613771,2,69,19.8016304347826,"Antioxidant activity "," http://amigo.geneontology.org/amigo/term/GO:0016209"," GSTO1 HP"
0.0967296792613771	1	4	1707890625	Oxidoreductase activity, acting on a sulfur group of donors, quinone or similar compound as acceptor	http://amigo.geneontology.org/amigo/term/GO:0016672	GSTO1	0.0967296792613771,1,4,170.7890625,"Oxidoreductase activity, acting on a sulfur group of donors, quinone or similar compound as acceptor "," http://amigo.geneontology.org/amigo/term/GO:0016672"," GSTO1"
0.0967296792613771	1	3	22771875	Oxidoreductase activity, acting on phosphorus or arsenic in donors	http://amigo.geneontology.org/amigo/term/GO:0030613	GSTO1	0.0967296792613771,1,3,227.71875,"Oxidoreductase activity, acting on phosphorus or arsenic in donors "," http://amigo.geneontology.org/amigo/term/GO:0030613"," GSTO1"
0.0967296792613771	1	3	22771875	Oxidoreductase activity, acting on phosphorus or arsenic in donors, disulfide as acceptor	http://amigo.geneontology.org/amigo/term/GO:0030614	GSTO1	0.0967296792613771,1,3,227.71875,"Oxidoreductase activity, acting on phosphorus or arsenic in donors, disulfide as acceptor "," http://amigo.geneontology.org/amigo/term/GO:0030614"," GSTO1"
0.0967296792613771	1	4	1707890625	Peptide antigen binding	http://amigo.geneontology.org/amigo/term/GO:0042605	BOLA-DRA	0.0967296792613771,1,4,170.7890625,"Peptide antigen binding "," http://amigo.geneontology.org/amigo/term/GO:0042605"," BOLA-DRA"
0.0967296792613771	1	3	22771875	Glutathione dehydrogenase (ascorbate) activity	http://amigo.geneontology.org/amigo/term/GO:0045174	GSTO1	0.0967296792613771,1,3,227.71875,"Glutathione dehydrogenase (ascorbate) activity "," http://amigo.geneontology.org/amigo/term/GO:0045174"," GSTO1"
0.0967296792613771	1	3	22771875	Methylarsonate reductase activity	http://amigo.geneontology.org/amigo/term/GO:0050610	GSTO1	0.0967296792613771,1,3,227.71875,"Methylarsonate reductase activity "," http://amigo.geneontology.org/amigo/term/GO:0050610"," GSTO1"
0.0967296792613771	1	3	22771875	Membrane curvature sensor activity	http://amigo.geneontology.org/amigo/term/GO:0140090	ICA1	0.0967296792613771,1,3,227.71875,"Membrane curvature sensor activity "," http://amigo.geneontology.org/amigo/term/GO:0140090"," ICA1"
0.0967296792613771	2	76	179777960526316	Platinum drug resistance	http://www.genome.jp/kegg-bin/show_pathway?bta01524	GSTO1 BAX	0.0967296792613771,2,76,17.9777960526316,"Platinum drug resistance","http://www.genome.jp/kegg-bin/show_pathway?bta01524 "," GSTO1 BAX"
0.0967296792613771	2	78	175168269230769	Antigen processing and presentation	http://www.genome.jp/kegg-bin/show_pathway?bta04612	BOLA-DRA	0.0967296792613771,2,78,17.5168269230769,"Antigen processing and presentation","http://www.genome.jp/kegg-bin/show_pathway?bta04612 "," BOLA-DRA "
0.0967296792613771	2	54	253020833333333	Intestinal immune network for IgA production	http://www.genome.jp/kegg-bin/show_pathway?bta04672	BOLA-DRA	0.0967296792613771,2,54,25.3020833333333,"Intestinal immune network for IgA production","http://www.genome.jp/kegg-bin/show_pathway?bta04672 "," BOLA-DRA "
0.0967296792613771	3	250	8197875	Salmonella infection	http://www.genome.jp/kegg-bin/show_pathway?bta05132	TLR2 BAX DYNC1H1	0.0967296792613771,3,250,8.197875,"Salmonella infection","http://www.genome.jp/kegg-bin/show_pathway?bta05132 "," TLR2 BAX DYNC1H1"
0.0967296792613771	3	224	91494140625	Human T-cell leukemia virus 1 infection	http://www.genome.jp/kegg-bin/show_pathway?bta05166	BOLA-DRA BAX	0.0967296792613771,3,224,9.1494140625,"Human T-cell leukemia virus 1 infection","http://www.genome.jp/kegg-bin/show_pathway?bta05166 "," BOLA-DRA BAX "
0.0967296792613771	3	217	94445564516129	Human immunodeficiency virus 1 infection	http://www.genome.jp/kegg-bin/show_pathway?bta05170	TLR2 CUL1 BAX	0.0967296792613771,3,217,9.4445564516129,"Human immunodeficiency virus 1 infection","http://www.genome.jp/kegg-bin/show_pathway?bta05170 "," TLR2 CUL1 BAX"
0.0967296792613771	3	244	839946209016393	Coronavirus disease	http://www.genome.jp/kegg-bin/show_pathway?bta05171	DDX58 TLR2 RPL35A	0.0967296792613771,3,244,8.39946209016393,"Coronavirus disease","http://www.genome.jp/kegg-bin/show_pathway?bta05171 "," DDX58 TLR2 RPL35A"
0.0967296792613771	2	58	235571120689655	Autoimmune thyroid disease	http://www.genome.jp/kegg-bin/show_pathway?bta05320	BOLA-DRA	0.0967296792613771,2,58,23.5571120689655,"Autoimmune thyroid disease","http://www.genome.jp/kegg-bin/show_pathway?bta05320 "," BOLA-DRA "
0.0967296792613771	2	50	2732625	Allograft rejection	http://www.genome.jp/kegg-bin/show_pathway?bta05330	BOLA-DRA	0.0967296792613771,2,50,27.32625,"Allograft rejection","http://www.genome.jp/kegg-bin/show_pathway?bta05330 "," BOLA-DRA "
0.0967296792613771	2	56	243984375	Graft-versus-host disease	http://www.genome.jp/kegg-bin/show_pathway?bta05332	BOLA-DRA	0.0967296792613771,2,56,24.3984375,"Graft-versus-host disease","http://www.genome.jp/kegg-bin/show_pathway?bta05332 "," BOLA-DRA "
0.0985572373368604	5	809	422222651421508	Peptide metabolic process	http://amigo.geneontology.org/amigo/term/GO:0006518	GSTO1 SEC11C EIF4G1 RPL35A NAT10	0.0985572373368604,5,809,4.22222651421508,"Peptide metabolic process "," http://amigo.geneontology.org/amigo/term/GO:0006518"," GSTO1 SEC11C EIF4G1 RPL35A NAT10"
0.101629697746119	1	5	13663125	OAS antiviral response	https://reactome.org/download/current	DDX58	0.101629697746119,1,5,136.63125,"OAS antiviral response","https://reactome.org/download/current"," DDX58"
0.101629697746119	2	82	166623475609756	WP1047 TNF alpha Signaling Pathway	http://www.wikipathways.org/instance/WP1047_r89903	CUL1 BAX	0.101629697746119,2,82,16.6623475609756,"WP1047 TNF alpha Signaling Pathway","http://www.wikipathways.org/instance/WP1047_r89903"," CUL1 BAX"
0.101629697746119	1	5	13663125	CD4-positive, CD25-positive, alpha-beta regulatory T cell differentiation	http://amigo.geneontology.org/amigo/term/GO:0002361	BOLA-DRA	0.101629697746119,1,5,136.63125,"CD4-positive, CD25-positive, alpha-beta regulatory T cell differentiation "," http://amigo.geneontology.org/amigo/term/GO:0002361"," BOLA-DRA"
0.101629697746119	1	5	13663125	MHC protein complex assembly	http://amigo.geneontology.org/amigo/term/GO:0002396	BOLA-DRA	0.101629697746119,1,5,136.63125,"MHC protein complex assembly "," http://amigo.geneontology.org/amigo/term/GO:0002396"," BOLA-DRA"
0.101629697746119	7	1554	307728040540541	Proteolysis	http://amigo.geneontology.org/amigo/term/GO:0006508	WDR48 HP UBA6 CUL1 SEC11C ERMP1 RNF180	0.101629697746119,7,1554,3.07728040540541,"Proteolysis "," http://amigo.geneontology.org/amigo/term/GO:0006508"," WDR48 HP UBA6 CUL1 SEC11C ERMP1 RNF180"
0.101629697746119	2	87	157047413793103	Antigen processing and presentation	http://amigo.geneontology.org/amigo/term/GO:0019882	BOLA-DRA	0.101629697746119,2,87,15.7047413793103,"Antigen processing and presentation "," http://amigo.geneontology.org/amigo/term/GO:0019882"," BOLA-DRA "
0.101629697746119	1	5	13663125	Positive regulation of translation in response to stress	http://amigo.geneontology.org/amigo/term/GO:0032056	EIF4G1	0.101629697746119,1,5,136.63125,"Positive regulation of translation in response to stress "," http://amigo.geneontology.org/amigo/term/GO:0032056"," EIF4G1"
0.101629697746119	1	5	13663125	Regulation of memory T cell differentiation	http://amigo.geneontology.org/amigo/term/GO:0043380	BOLA-DRA	0.101629697746119,1,5,136.63125,"Regulation of memory T cell differentiation "," http://amigo.geneontology.org/amigo/term/GO:0043380"," BOLA-DRA"
0.101629697746119	2	85	160742647058824	Positive regulation of translation	http://amigo.geneontology.org/amigo/term/GO:0045727	EIF4G1 NAT10	0.101629697746119,2,85,16.0742647058824,"Positive regulation of translation "," http://amigo.geneontology.org/amigo/term/GO:0045727"," EIF4G1 NAT10"
0.101629697746119	1	5	13663125	CRD-mediated mRNA stabilization	http://amigo.geneontology.org/amigo/term/GO:0070934	YBX1	0.101629697746119,1,5,136.63125,"CRD-mediated mRNA stabilization "," http://amigo.geneontology.org/amigo/term/GO:0070934"," YBX1"
0.101629697746119	1	5	13663125	Minus-end-directed organelle transport along microtubule	http://amigo.geneontology.org/amigo/term/GO:0072385	DYNC1H1	0.101629697746119,1,5,136.63125,"Minus-end-directed organelle transport along microtubule "," http://amigo.geneontology.org/amigo/term/GO:0072385"," DYNC1H1"
0.101629697746119	1	5	13663125	Regulation of protein monoubiquitination	http://amigo.geneontology.org/amigo/term/GO:1902525	WDR48	0.101629697746119,1,5,136.63125,"Regulation of protein monoubiquitination "," http://amigo.geneontology.org/amigo/term/GO:1902525"," WDR48"
0.101629697746119	1	5	13663125	Regulation of response to macrophage colony-stimulating factor	http://amigo.geneontology.org/amigo/term/GO:1903969	TLR2	0.101629697746119,1,5,136.63125,"Regulation of response to macrophage colony-stimulating factor "," http://amigo.geneontology.org/amigo/term/GO:1903969"," TLR2"
0.101629697746119	1	5	13663125	Regulation of cellular response to macrophage colony-stimulating factor stimulus	http://amigo.geneontology.org/amigo/term/GO:1903972	TLR2	0.101629697746119,1,5,136.63125,"Regulation of cellular response to macrophage colony-stimulating factor stimulus "," http://amigo.geneontology.org/amigo/term/GO:1903972"," TLR2"
0.101629697746119	1	5	13663125	T cell receptor binding	http://amigo.geneontology.org/amigo/term/GO:0042608	BOLA-DRA	0.101629697746119,1,5,136.63125,"T cell receptor binding "," http://amigo.geneontology.org/amigo/term/GO:0042608"," BOLA-DRA"
0.101629697746119	2	83	164615963855422	P00029 Huntington disease	ftp://ftp.pantherdb.org/pathway/current_release	BAX DYNC1H1	0.101629697746119,2,83,16.4615963855422,"P00029 Huntington disease","ftp://ftp.pantherdb.org/pathway/current_release"," BAX DYNC1H1"
0.104127169970704	4	555	492364864864865	Adaptive Immune System	https://reactome.org/download/current	UBA6 CUL1 BOLA-DRA	0.104127169970704,4,555,4.92364864864865,"Adaptive Immune System","https://reactome.org/download/current"," UBA6 CUL1 BOLA-DRA "
0.104127169970704	1	7	9759375	WP992 Methylation Pathways	http://www.wikipathways.org/instance/WP992_r80687	HNMT	0.104127169970704,1,7,97.59375,"WP992 Methylation Pathways","http://www.wikipathways.org/instance/WP992_r80687"," HNMT"
0.104127169970704	3	282	726761968085106	Adaptive immune response	http://amigo.geneontology.org/amigo/term/GO:0002250	BOLA-DRA CD48	0.104127169970704,3,282,7.26761968085106,"Adaptive immune response "," http://amigo.geneontology.org/amigo/term/GO:0002250"," BOLA-DRA CD48 "
0.104127169970704	2	101	135278465346535	Positive regulation of leukocyte mediated immunity	http://amigo.geneontology.org/amigo/term/GO:0002705	DDX58 BOLA-DRA	0.104127169970704,2,101,13.5278465346535,"Positive regulation of leukocyte mediated immunity "," http://amigo.geneontology.org/amigo/term/GO:0002705"," DDX58 BOLA-DRA"
0.104127169970704	1	6	113859375	Positive regulation of dendritic cell cytokine production	http://amigo.geneontology.org/amigo/term/GO:0002732	DDX58	0.104127169970704,1,6,113.859375,"Positive regulation of dendritic cell cytokine production "," http://amigo.geneontology.org/amigo/term/GO:0002732"," DDX58"
0.104127169970704	1	7	9759375	TP53 Regulates Transcription of Genes Involved in G2 Cell Cycle Arrest	https://reactome.org/download/current	BAX	0.104127169970704,1,7,97.59375,"TP53 Regulates Transcription of Genes Involved in G2 Cell Cycle Arrest","https://reactome.org/download/current"," BAX"
0.104127169970704	1	7	9759375	Antigen processing and presentation of exogenous peptide antigen via MHC class II	http://amigo.geneontology.org/amigo/term/GO:0019886	BOLA-DRA	0.104127169970704,1,7,97.59375,"Antigen processing and presentation of exogenous peptide antigen via MHC class II "," http://amigo.geneontology.org/amigo/term/GO:0019886"," BOLA-DRA"
0.104127169970704	2	102	133952205882353	Positive regulation of cellular amide metabolic process	http://amigo.geneontology.org/amigo/term/GO:0034250	EIF4G1 NAT10	0.104127169970704,2,102,13.3952205882353,"Positive regulation of cellular amide metabolic process "," http://amigo.geneontology.org/amigo/term/GO:0034250"," EIF4G1 NAT10"
0.104127169970704	1	6	113859375	Neurotransmitter catabolic process	http://amigo.geneontology.org/amigo/term/GO:0042135	HNMT	0.104127169970704,1,6,113.859375,"Neurotransmitter catabolic process "," http://amigo.geneontology.org/amigo/term/GO:0042135"," HNMT"
0.104127169970704	1	6	113859375	Serotonin metabolic process	http://amigo.geneontology.org/amigo/term/GO:0042428	RNF180	0.104127169970704,1,6,113.859375,"Serotonin metabolic process "," http://amigo.geneontology.org/amigo/term/GO:0042428"," RNF180"
0.104127169970704	1	6	113859375	Memory T cell differentiation	http://amigo.geneontology.org/amigo/term/GO:0043379	BOLA-DRA	0.104127169970704,1,6,113.859375,"Memory T cell differentiation "," http://amigo.geneontology.org/amigo/term/GO:0043379"," BOLA-DRA"
0.104127169970704	1	7	9759375	Chromatin-mediated maintenance of transcription	http://amigo.geneontology.org/amigo/term/GO:0048096	ZMIZ2	0.104127169970704,1,7,97.59375,"Chromatin-mediated maintenance of transcription "," http://amigo.geneontology.org/amigo/term/GO:0048096"," ZMIZ2"
0.104127169970704	2	101	135278465346535	Nucleic acid transport	http://amigo.geneontology.org/amigo/term/GO:0050657	CHTOP YBX1	0.104127169970704,2,101,13.5278465346535,"Nucleic acid transport "," http://amigo.geneontology.org/amigo/term/GO:0050657"," CHTOP YBX1"
0.104127169970704	2	101	135278465346535	RNA transport	http://amigo.geneontology.org/amigo/term/GO:0050658	CHTOP YBX1	0.104127169970704,2,101,13.5278465346535,"RNA transport "," http://amigo.geneontology.org/amigo/term/GO:0050658"," CHTOP YBX1"
0.104127169970704	1	7	9759375	TRNA transport	http://amigo.geneontology.org/amigo/term/GO:0051031	YBX1	0.104127169970704,1,7,97.59375,"TRNA transport "," http://amigo.geneontology.org/amigo/term/GO:0051031"," YBX1"
0.104127169970704	1	6	113859375	Positive regulation of helicase activity	http://amigo.geneontology.org/amigo/term/GO:0051096	CHTOP	0.104127169970704,1,6,113.859375,"Positive regulation of helicase activity "," http://amigo.geneontology.org/amigo/term/GO:0051096"," CHTOP"
0.104127169970704	2	103	132651699029126	Establishment of RNA localization	http://amigo.geneontology.org/amigo/term/GO:0051236	CHTOP YBX1	0.104127169970704,2,103,13.2651699029126,"Establishment of RNA localization "," http://amigo.geneontology.org/amigo/term/GO:0051236"," CHTOP YBX1"
0.104127169970704	1	7	9759375	Response to lipoteichoic acid	http://amigo.geneontology.org/amigo/term/GO:0070391	TLR2	0.104127169970704,1,7,97.59375,"Response to lipoteichoic acid "," http://amigo.geneontology.org/amigo/term/GO:0070391"," TLR2"
0.104127169970704	1	7	9759375	Cellular response to lipoteichoic acid	http://amigo.geneontology.org/amigo/term/GO:0071223	TLR2	0.104127169970704,1,7,97.59375,"Cellular response to lipoteichoic acid "," http://amigo.geneontology.org/amigo/term/GO:0071223"," TLR2"
0.104127169970704	1	7	9759375	Regulation of metaphase plate congression	http://amigo.geneontology.org/amigo/term/GO:0090235	DYNC1H1	0.104127169970704,1,7,97.59375,"Regulation of metaphase plate congression "," http://amigo.geneontology.org/amigo/term/GO:0090235"," DYNC1H1"
0.104127169970704	1	7	9759375	Immunological memory formation process	http://amigo.geneontology.org/amigo/term/GO:0090715	BOLA-DRA	0.104127169970704,1,7,97.59375,"Immunological memory formation process "," http://amigo.geneontology.org/amigo/term/GO:0090715"," BOLA-DRA"
0.104127169970704	1	7	9759375	Primary amino compound metabolic process	http://amigo.geneontology.org/amigo/term/GO:1901160	RNF180	0.104127169970704,1,7,97.59375,"Primary amino compound metabolic process "," http://amigo.geneontology.org/amigo/term/GO:1901160"," RNF180"
0.104127169970704	1	6	113859375	Regulation of mRNA binding	http://amigo.geneontology.org/amigo/term/GO:1902415	EIF4G1	0.104127169970704,1,6,113.859375,"Regulation of mRNA binding "," http://amigo.geneontology.org/amigo/term/GO:1902415"," EIF4G1"
0.104127169970704	1	6	113859375	Positive regulation of mRNA binding	http://amigo.geneontology.org/amigo/term/GO:1902416	EIF4G1	0.104127169970704,1,6,113.859375,"Positive regulation of mRNA binding "," http://amigo.geneontology.org/amigo/term/GO:1902416"," EIF4G1"
0.104127169970704	1	7	9759375	Positive regulation of protein deubiquitination	http://amigo.geneontology.org/amigo/term/GO:1903003	WDR48	0.104127169970704,1,7,97.59375,"Positive regulation of protein deubiquitination "," http://amigo.geneontology.org/amigo/term/GO:1903003"," WDR48"
0.104127169970704	2	103	132651699029126	Positive regulation of protein modification by small protein conjugation or removal	http://amigo.geneontology.org/amigo/term/GO:1903322	WDR48 RNF180	0.104127169970704,2,103,13.2651699029126,"Positive regulation of protein modification by small protein conjugation or removal "," http://amigo.geneontology.org/amigo/term/GO:1903322"," WDR48 RNF180"
0.104127169970704	1	7	9759375	Protein localization to cytoplasmic stress granule	http://amigo.geneontology.org/amigo/term/GO:1903608	YBX1	0.104127169970704,1,7,97.59375,"Protein localization to cytoplasmic stress granule "," http://amigo.geneontology.org/amigo/term/GO:1903608"," YBX1"
0.104127169970704	1	7	9759375	Positive regulation of RNA binding	http://amigo.geneontology.org/amigo/term/GO:1905216	EIF4G1	0.104127169970704,1,7,97.59375,"Positive regulation of RNA binding "," http://amigo.geneontology.org/amigo/term/GO:1905216"," EIF4G1"
0.104127169970704	1	6	113859375	Regulation of miRNA mediated inhibition of translation	http://amigo.geneontology.org/amigo/term/GO:1905616	EIF4G1	0.104127169970704,1,6,113.859375,"Regulation of miRNA mediated inhibition of translation "," http://amigo.geneontology.org/amigo/term/GO:1905616"," EIF4G1"
0.104127169970704	1	6	113859375	Positive regulation of miRNA mediated inhibition of translation	http://amigo.geneontology.org/amigo/term/GO:1905618	EIF4G1	0.104127169970704,1,6,113.859375,"Positive regulation of miRNA mediated inhibition of translation "," http://amigo.geneontology.org/amigo/term/GO:1905618"," EIF4G1"
0.104127169970704	1	6	113859375	Signal peptidase complex	http://amigo.geneontology.org/amigo/term/GO:0005787	SEC11C	0.104127169970704,1,6,113.859375,"Signal peptidase complex "," http://amigo.geneontology.org/amigo/term/GO:0005787"," SEC11C"
0.104127169970704	1	6	113859375	CRD-mediated mRNA stability complex	http://amigo.geneontology.org/amigo/term/GO:0070937	YBX1	0.104127169970704,1,6,113.859375,"CRD-mediated mRNA stability complex "," http://amigo.geneontology.org/amigo/term/GO:0070937"," YBX1"
0.104127169970704	2	94	145352393617021	Single-stranded DNA binding	http://amigo.geneontology.org/amigo/term/GO:0003697	WDR48 YBX1	0.104127169970704,2,94,14.5352393617021,"Single-stranded DNA binding "," http://amigo.geneontology.org/amigo/term/GO:0003697"," WDR48 YBX1"
0.104127169970704	1	6	113859375	Hemoglobin binding	http://amigo.geneontology.org/amigo/term/GO:0030492	HP	0.104127169970704,1,6,113.859375,"Hemoglobin binding "," http://amigo.geneontology.org/amigo/term/GO:0030492"," HP"
0.104127169970704	2	101	135278465346535	Hematopoietic cell lineage	http://www.genome.jp/kegg-bin/show_pathway?bta04640	BOLA-DRA	0.104127169970704,2,101,13.5278465346535,"Hematopoietic cell lineage","http://www.genome.jp/kegg-bin/show_pathway?bta04640 "," BOLA-DRA "
0.104127169970704	2	95	143822368421053	Th1 and Th2 cell differentiation	http://www.genome.jp/kegg-bin/show_pathway?bta04658	BOLA-DRA	0.104127169970704,2,95,14.3822368421053,"Th1 and Th2 cell differentiation","http://www.genome.jp/kegg-bin/show_pathway?bta04658 "," BOLA-DRA "
0.104127169970704	2	98	139419642857143	Staphylococcus aureus infection	http://www.genome.jp/kegg-bin/show_pathway?bta05150	BOLA-DRA	0.104127169970704,2,98,13.9419642857143,"Staphylococcus aureus infection","http://www.genome.jp/kegg-bin/show_pathway?bta05150 "," BOLA-DRA "
0.104127169970704	1	6	113859375	Bta-mir-6121-3p target gene	https://www.mirnet.ca	YBX1	0.104127169970704,1,6,113.859375,"Bta-mir-6121-3p target gene","https://www.mirnet.ca"," YBX1"
0.104127169970704	1	7	9759375	P04395 Vasopressin synthesis	ftp://ftp.pantherdb.org/pathway/current_release	SEC11C	0.104127169970704,1,7,97.59375,"P04395 Vasopressin synthesis","ftp://ftp.pantherdb.org/pathway/current_release"," SEC11C"
0.112207488774615	2	109	125349770642202	Nonsense Mediated Decay NMD independent of the Exon Junction Complex EJC	https://reactome.org/download/current	EIF4G1 RPL35A	0.112207488774615,2,109,12.5349770642202,"Nonsense Mediated Decay NMD independent of the Exon Junction Complex EJC","https://reactome.org/download/current"," EIF4G1 RPL35A"
0.112207488774615	1	8	8539453125	Apoptotic factor-mediated response	https://reactome.org/download/current	BAX	0.112207488774615,1,8,85.39453125,"Apoptotic factor-mediated response","https://reactome.org/download/current"," BAX"
0.112207488774615	6	1326	309120475113122	Immune response	http://amigo.geneontology.org/amigo/term/GO:0006955	DDX58 HP TLR2 BOLA-DRA CD48	0.112207488774615,6,1326,3.09120475113122,"Immune response "," http://amigo.geneontology.org/amigo/term/GO:0006955"," DDX58 HP TLR2 BOLA-DRA CD48 "
0.112207488774615	2	110	124210227272727	Response to toxic substance	http://amigo.geneontology.org/amigo/term/GO:0009636	GSTO1 HP	0.112207488774615,2,110,12.4210227272727,"Response to toxic substance "," http://amigo.geneontology.org/amigo/term/GO:0009636"," GSTO1 HP"
0.112207488774615	1	8	8539453125	AUF1 hnRNP D0 binds and destabilizes mRNA	https://reactome.org/download/current	EIF4G1	0.112207488774615,1,8,85.39453125,"AUF1 hnRNP D0 binds and destabilizes mRNA","https://reactome.org/download/current"," EIF4G1"
0.112207488774615	1	8	8539453125	Immunological memory process	http://amigo.geneontology.org/amigo/term/GO:0090713	BOLA-DRA	0.112207488774615,1,8,85.39453125,"Immunological memory process "," http://amigo.geneontology.org/amigo/term/GO:0090713"," BOLA-DRA"
0.112207488774615	1	8	8539453125	Regulation of RNA binding	http://amigo.geneontology.org/amigo/term/GO:1905214	EIF4G1	0.112207488774615,1,8,85.39453125,"Regulation of RNA binding "," http://amigo.geneontology.org/amigo/term/GO:1905214"," EIF4G1"
0.112207488774615	1	8	8539453125	Eukaryotic initiation factor 4E binding	http://amigo.geneontology.org/amigo/term/GO:0008190	EIF4G1	0.112207488774615,1,8,85.39453125,"Eukaryotic initiation factor 4E binding "," http://amigo.geneontology.org/amigo/term/GO:0008190"," EIF4G1"
0.112207488774615	2	112	1219921875	Th17 cell differentiation	http://www.genome.jp/kegg-bin/show_pathway?bta04659	BOLA-DRA	0.112207488774615,2,112,12.19921875,"Th17 cell differentiation","http://www.genome.jp/kegg-bin/show_pathway?bta04659 "," BOLA-DRA "
0.113465204550425	2	123	111082317073171	L13a-mediated translational silencing of Ceruloplasmin expression	https://reactome.org/download/current	EIF4G1 RPL35A	0.113465204550425,2,123,11.1082317073171,"L13a-mediated translational silencing of Ceruloplasmin expression","https://reactome.org/download/current"," EIF4G1 RPL35A"
0.113465204550425	2	125	109305	Eukaryotic Translation Initiation	https://reactome.org/download/current	EIF4G1 RPL35A	0.113465204550425,2,125,10.9305,"Eukaryotic Translation Initiation","https://reactome.org/download/current"," EIF4G1 RPL35A"
0.113465204550425	2	125	109305	Cap-dependent Translation Initiation	https://reactome.org/download/current	EIF4G1 RPL35A	0.113465204550425,2,125,10.9305,"Cap-dependent Translation Initiation","https://reactome.org/download/current"," EIF4G1 RPL35A"
0.113465204550425	2	125	109305	Nonsense-Mediated Decay NMD	https://reactome.org/download/current	EIF4G1 RPL35A	0.113465204550425,2,125,10.9305,"Nonsense-Mediated Decay NMD","https://reactome.org/download/current"," EIF4G1 RPL35A"
0.113465204550425	2	125	109305	Nonsense Mediated Decay NMD enhanced by the Exon Junction Complex EJC	https://reactome.org/download/current	EIF4G1 RPL35A	0.113465204550425,2,125,10.9305,"Nonsense Mediated Decay NMD enhanced by the Exon Junction Complex EJC","https://reactome.org/download/current"," EIF4G1 RPL35A"
0.113465204550425	2	122	111992827868852	Mitotic G2-G2/M phases	https://reactome.org/download/current	CUL1 DYNC1H1	0.113465204550425,2,122,11.1992827868852,"Mitotic G2-G2/M phases","https://reactome.org/download/current"," CUL1 DYNC1H1"
0.113465204550425	2	120	113859375	G2/M Transition	https://reactome.org/download/current	CUL1 DYNC1H1	0.113465204550425,2,120,11.3859375,"G2/M Transition","https://reactome.org/download/current"," CUL1 DYNC1H1"
0.113465204550425	1	10	68315625	Synthesis secretion and deacylation of Ghrelin	https://reactome.org/download/current	SEC11C	0.113465204550425,1,10,68.315625,"Synthesis secretion and deacylation of Ghrelin","https://reactome.org/download/current"," SEC11C"
0.113465204550425	1	10	68315625	FBXL7 down-regulates AURKA during mitotic entry and in early mitosis	https://reactome.org/download/current	CUL1	0.113465204550425,1,10,68.315625,"FBXL7 down-regulates AURKA during mitotic entry and in early mitosis","https://reactome.org/download/current"," CUL1"
0.113465204550425	1	10	68315625	Regulation of RUNX2 expression and activity	https://reactome.org/download/current	CUL1	0.113465204550425,1,10,68.315625,"Regulation of RUNX2 expression and activity","https://reactome.org/download/current"," CUL1"
0.113465204550425	1	9	7590625	Dendritic cell cytokine production	http://amigo.geneontology.org/amigo/term/GO:0002371	DDX58	0.113465204550425,1,9,75.90625,"Dendritic cell cytokine production "," http://amigo.geneontology.org/amigo/term/GO:0002371"," DDX58"
0.113465204550425	1	9	7590625	Dendritic cell antigen processing and presentation	http://amigo.geneontology.org/amigo/term/GO:0002468	BOLA-DRA	0.113465204550425,1,9,75.90625,"Dendritic cell antigen processing and presentation "," http://amigo.geneontology.org/amigo/term/GO:0002468"," BOLA-DRA"
0.113465204550425	1	9	7590625	Regulation of dendritic cell cytokine production	http://amigo.geneontology.org/amigo/term/GO:0002730	DDX58	0.113465204550425,1,9,75.90625,"Regulation of dendritic cell cytokine production "," http://amigo.geneontology.org/amigo/term/GO:0002730"," DDX58"
0.113465204550425	1	10	68315625	Positive regulation of myeloid leukocyte mediated immunity	http://amigo.geneontology.org/amigo/term/GO:0002888	DDX58	0.113465204550425,1,10,68.315625,"Positive regulation of myeloid leukocyte mediated immunity "," http://amigo.geneontology.org/amigo/term/GO:0002888"," DDX58"
0.113465204550425	2	120	113859375	RNA localization	http://amigo.geneontology.org/amigo/term/GO:0006403	CHTOP YBX1	0.113465204550425,2,120,11.3859375,"RNA localization "," http://amigo.geneontology.org/amigo/term/GO:0006403"," CHTOP YBX1"
0.113465204550425	1	9	7590625	Signal peptide processing	http://amigo.geneontology.org/amigo/term/GO:0006465	SEC11C	0.113465204550425,1,9,75.90625,"Signal peptide processing "," http://amigo.geneontology.org/amigo/term/GO:0006465"," SEC11C"
0.113465204550425	1	9	7590625	Retrograde axonal transport	http://amigo.geneontology.org/amigo/term/GO:0008090	DYNC1H1	0.113465204550425,1,9,75.90625,"Retrograde axonal transport "," http://amigo.geneontology.org/amigo/term/GO:0008090"," DYNC1H1"
0.113465204550425	1	9	7590625	Prolactin receptor signaling	https://reactome.org/download/current	CUL1	0.113465204550425,1,9,75.90625,"Prolactin receptor signaling","https://reactome.org/download/current"," CUL1"
0.113465204550425	1	9	7590625	Attenuation phase	https://reactome.org/download/current	HSBP1	0.113465204550425,1,9,75.90625,"Attenuation phase","https://reactome.org/download/current"," HSBP1"
0.113465204550425	5	999	341920045045045	Positive regulation of cellular protein metabolic process	http://amigo.geneontology.org/amigo/term/GO:0032270	WDR48 CHTOP EIF4G1 NAT10 RNF180	0.113465204550425,5,999,3.41920045045045,"Positive regulation of cellular protein metabolic process "," http://amigo.geneontology.org/amigo/term/GO:0032270"," WDR48 CHTOP EIF4G1 NAT10 RNF180"
0.113465204550425	1	9	7590625	Detection of molecule of bacterial origin	http://amigo.geneontology.org/amigo/term/GO:0032490	TLR2	0.113465204550425,1,9,75.90625,"Detection of molecule of bacterial origin "," http://amigo.geneontology.org/amigo/term/GO:0032490"," TLR2"
0.113465204550425	1	10	68315625	Response to macrophage colony-stimulating factor	http://amigo.geneontology.org/amigo/term/GO:0036005	TLR2	0.113465204550425,1,10,68.315625,"Response to macrophage colony-stimulating factor "," http://amigo.geneontology.org/amigo/term/GO:0036005"," TLR2"
0.113465204550425	1	10	68315625	Cellular response to macrophage colony-stimulating factor stimulus	http://amigo.geneontology.org/amigo/term/GO:0036006	TLR2	0.113465204550425,1,10,68.315625,"Cellular response to macrophage colony-stimulating factor stimulus "," http://amigo.geneontology.org/amigo/term/GO:0036006"," TLR2"
0.113465204550425	1	10	68315625	Regulation of translation in response to endoplasmic reticulum stress	http://amigo.geneontology.org/amigo/term/GO:0036490	EIF4G1	0.113465204550425,1,10,68.315625,"Regulation of translation in response to endoplasmic reticulum stress "," http://amigo.geneontology.org/amigo/term/GO:0036490"," EIF4G1"
0.113465204550425	1	10	68315625	Norepinephrine metabolic process	http://amigo.geneontology.org/amigo/term/GO:0042415	RNF180	0.113465204550425,1,10,68.315625,"Norepinephrine metabolic process "," http://amigo.geneontology.org/amigo/term/GO:0042415"," RNF180"
0.113465204550425	5	998	342262650300601	Cellular amide metabolic process	http://amigo.geneontology.org/amigo/term/GO:0043603	GSTO1 SEC11C EIF4G1 RPL35A NAT10	0.113465204550425,5,998,3.42262650300601,"Cellular amide metabolic process "," http://amigo.geneontology.org/amigo/term/GO:0043603"," GSTO1 SEC11C EIF4G1 RPL35A NAT10"
0.113465204550425	1	10	68315625	Positive regulation of regulatory T cell differentiation	http://amigo.geneontology.org/amigo/term/GO:0045591	BOLA-DRA	0.113465204550425,1,10,68.315625,"Positive regulation of regulatory T cell differentiation "," http://amigo.geneontology.org/amigo/term/GO:0045591"," BOLA-DRA"
0.113465204550425	1	10	68315625	Regulation of helicase activity	http://amigo.geneontology.org/amigo/term/GO:0051095	CHTOP	0.113465204550425,1,10,68.315625,"Regulation of helicase activity "," http://amigo.geneontology.org/amigo/term/GO:0051095"," CHTOP"
0.113465204550425	1	10	68315625	Positive regulation of myeloid leukocyte cytokine production involved in immune response	http://amigo.geneontology.org/amigo/term/GO:0061081	DDX58	0.113465204550425,1,10,68.315625,"Positive regulation of myeloid leukocyte cytokine production involved in immune response "," http://amigo.geneontology.org/amigo/term/GO:0061081"," DDX58"
0.113465204550425	1	9	7590625	Response to interleukin-7	http://amigo.geneontology.org/amigo/term/GO:0098760	YBX1	0.113465204550425,1,9,75.90625,"Response to interleukin-7 "," http://amigo.geneontology.org/amigo/term/GO:0098760"," YBX1"
0.113465204550425	1	9	7590625	Cellular response to interleukin-7	http://amigo.geneontology.org/amigo/term/GO:0098761	YBX1	0.113465204550425,1,9,75.90625,"Cellular response to interleukin-7 "," http://amigo.geneontology.org/amigo/term/GO:0098761"," YBX1"
0.113465204550425	1	9	7590625	Eukaryotic translation initiation factor 4F complex	http://amigo.geneontology.org/amigo/term/GO:0016281	EIF4G1	0.113465204550425,1,9,75.90625,"Eukaryotic translation initiation factor 4F complex "," http://amigo.geneontology.org/amigo/term/GO:0016281"," EIF4G1"
0.113465204550425	1	10	68315625	Ubiquitin-like modifier activating enzyme activity	http://amigo.geneontology.org/amigo/term/GO:0008641	UBA6	0.113465204550425,1,10,68.315625,"Ubiquitin-like modifier activating enzyme activity "," http://amigo.geneontology.org/amigo/term/GO:0008641"," UBA6"
0.113465204550425	1	9	7590625	Toll-like receptor binding	http://amigo.geneontology.org/amigo/term/GO:0035325	TLR2	0.113465204550425,1,9,75.90625,"Toll-like receptor binding "," http://amigo.geneontology.org/amigo/term/GO:0035325"," TLR2"
0.113465204550425	1	9	7590625	Peptidoglycan binding	http://amigo.geneontology.org/amigo/term/GO:0042834	TLR2	0.113465204550425,1,9,75.90625,"Peptidoglycan binding "," http://amigo.geneontology.org/amigo/term/GO:0042834"," TLR2"
0.113465204550425	2	123	111082317073171	Cell cycle	http://www.genome.jp/kegg-bin/show_pathway?bta04110	CUL1 MCM3	0.113465204550425,2,123,11.1082317073171,"Cell cycle","http://www.genome.jp/kegg-bin/show_pathway?bta04110 "," CUL1 MCM3"
0.115021738088757	2	127	107583661417323	Systemic lupus erythematosus	http://www.genome.jp/kegg-bin/show_pathway?bta05322	BOLA-DRA	0.115021738088757,2,127,10.7583661417323,"Systemic lupus erythematosus","http://www.genome.jp/kegg-bin/show_pathway?bta05322 "," BOLA-DRA "
0.120924708561322	1	11	621051136363636	Antigen processing and presentation of exogenous peptide antigen	http://amigo.geneontology.org/amigo/term/GO:0002478	BOLA-DRA	0.120924708561322,1,11,62.1051136363636,"Antigen processing and presentation of exogenous peptide antigen "," http://amigo.geneontology.org/amigo/term/GO:0002478"," BOLA-DRA"
0.120924708561322	1	11	621051136363636	Detection of bacterium	http://amigo.geneontology.org/amigo/term/GO:0016045	TLR2	0.120924708561322,1,11,62.1051136363636,"Detection of bacterium "," http://amigo.geneontology.org/amigo/term/GO:0016045"," TLR2"
0.120924708561322	1	11	621051136363636	Positive regulation of gene expression, epigenetic	http://amigo.geneontology.org/amigo/term/GO:0045815	ZMIZ2	0.120924708561322,1,11,62.1051136363636,"Positive regulation of gene expression, epigenetic "," http://amigo.geneontology.org/amigo/term/GO:0045815"," ZMIZ2"
0.120924708561322	1	11	621051136363636	Positive regulation of double-strand break repair via homologous recombination	http://amigo.geneontology.org/amigo/term/GO:1905168	WDR48	0.120924708561322,1,11,62.1051136363636,"Positive regulation of double-strand break repair via homologous recombination "," http://amigo.geneontology.org/amigo/term/GO:1905168"," WDR48"
0.120924708561322	1	11	621051136363636	Intermediate filament binding	http://amigo.geneontology.org/amigo/term/GO:0019215	NES	0.120924708561322,1,11,62.1051136363636,"Intermediate filament binding "," http://amigo.geneontology.org/amigo/term/GO:0019215"," NES"
0.121512940128361	5	1034	330346349129594	Post-translational protein modification	https://reactome.org/download/current	DDX58 TULP4 UBA6 CUL1 DYNC1H1	0.121512940128361,5,1034,3.30346349129594,"Post-translational protein modification","https://reactome.org/download/current"," DDX58 TULP4 UBA6 CUL1 DYNC1H1"
0.121512940128361	2	133	102730263157895	Regulation of adaptive immune response	http://amigo.geneontology.org/amigo/term/GO:0002819	BOLA-DRA CD48	0.121512940128361,2,133,10.2730263157895,"Regulation of adaptive immune response "," http://amigo.geneontology.org/amigo/term/GO:0002819"," BOLA-DRA CD48"
0.121512940128361	3	367	558438351498638	Posttranscriptional regulation of gene expression	http://amigo.geneontology.org/amigo/term/GO:0010608	EIF4G1 NAT10 YBX1	0.121512940128361,3,367,5.58438351498638,"Posttranscriptional regulation of gene expression "," http://amigo.geneontology.org/amigo/term/GO:0010608"," EIF4G1 NAT10 YBX1"
0.122497312811197	1	12	569296875	Antigen processing and presentation of peptide antigen via MHC class II	http://amigo.geneontology.org/amigo/term/GO:0002495	BOLA-DRA	0.122497312811197,1,12,56.9296875,"Antigen processing and presentation of peptide antigen via MHC class II "," http://amigo.geneontology.org/amigo/term/GO:0002495"," BOLA-DRA"
0.122497312811197	1	12	569296875	Dectin-1 mediated noncanonical NF-kB signaling	https://reactome.org/download/current	CUL1	0.122497312811197,1,12,56.9296875,"Dectin-1 mediated noncanonical NF-kB signaling","https://reactome.org/download/current"," CUL1"
0.122497312811197	1	12	569296875	NIK-->noncanonical NF-kB signaling	https://reactome.org/download/current	CUL1	0.122497312811197,1,12,56.9296875,"NIK-->noncanonical NF-kB signaling","https://reactome.org/download/current"," CUL1"
0.122497312811197	1	12	569296875	I-kappaB phosphorylation	http://amigo.geneontology.org/amigo/term/GO:0007252	TLR2	0.122497312811197,1,12,56.9296875,"I-kappaB phosphorylation "," http://amigo.geneontology.org/amigo/term/GO:0007252"," TLR2"
0.122497312811197	1	12	569296875	MAP3K8 TPL2-dependent MAPK1/3 activation	https://reactome.org/download/current	CUL1	0.122497312811197,1,12,56.9296875,"MAP3K8 TPL2-dependent MAPK1/3 activation","https://reactome.org/download/current"," CUL1"
0.122497312811197	1	12	569296875	Negative regulation of peptidyl-threonine phosphorylation	http://amigo.geneontology.org/amigo/term/GO:0010801	EIF4G1	0.122497312811197,1,12,56.9296875,"Negative regulation of peptidyl-threonine phosphorylation "," http://amigo.geneontology.org/amigo/term/GO:0010801"," EIF4G1"
0.122497312811197	1	12	569296875	Regulation of protein deubiquitination	http://amigo.geneontology.org/amigo/term/GO:0090085	WDR48	0.122497312811197,1,12,56.9296875,"Regulation of protein deubiquitination "," http://amigo.geneontology.org/amigo/term/GO:0090085"," WDR48"
0.122497312811197	1	12	569296875	Detection of other organism	http://amigo.geneontology.org/amigo/term/GO:0098543	TLR2	0.122497312811197,1,12,56.9296875,"Detection of other organism "," http://amigo.geneontology.org/amigo/term/GO:0098543"," TLR2"
0.122497312811197	1	12	569296875	Transcription export complex	http://amigo.geneontology.org/amigo/term/GO:0000346	CHTOP	0.122497312811197,1,12,56.9296875,"Transcription export complex "," http://amigo.geneontology.org/amigo/term/GO:0000346"," CHTOP"
0.122497312811197	1	12	569296875	MCM complex	http://amigo.geneontology.org/amigo/term/GO:0042555	MCM3	0.122497312811197,1,12,56.9296875,"MCM complex "," http://amigo.geneontology.org/amigo/term/GO:0042555"," MCM3"
0.122497312811197	2	136	100464154411765	Helicase activity	http://amigo.geneontology.org/amigo/term/GO:0004386	DDX58 MCM3	0.122497312811197,2,136,10.0464154411765,"Helicase activity "," http://amigo.geneontology.org/amigo/term/GO:0004386"," DDX58 MCM3"
0.122497312811197	3	376	54507147606383	Ubiquitin-protein transferase activity	http://amigo.geneontology.org/amigo/term/GO:0004842	CUL1 KCMF1 RNF180	0.122497312811197,3,376,5.4507147606383,"Ubiquitin-protein transferase activity "," http://amigo.geneontology.org/amigo/term/GO:0004842"," CUL1 KCMF1 RNF180"
0.126713503432443	5	1062	321636652542373	Positive regulation of protein metabolic process	http://amigo.geneontology.org/amigo/term/GO:0051247	WDR48 CHTOP EIF4G1 NAT10 RNF180	0.126713503432443,5,1062,3.21636652542373,"Positive regulation of protein metabolic process "," http://amigo.geneontology.org/amigo/term/GO:0051247"," WDR48 CHTOP EIF4G1 NAT10 RNF180"
0.131372179655264	1	13	525504807692308	Toll-like receptor 2 signaling pathway	http://amigo.geneontology.org/amigo/term/GO:0034134	TLR2	0.131372179655264,1,13,52.5504807692308,"Toll-like receptor 2 signaling pathway "," http://amigo.geneontology.org/amigo/term/GO:0034134"," TLR2"
0.132954917239859	2	146	935830479452055	Regulation of protein secretion	http://amigo.geneontology.org/amigo/term/GO:0050708	ICA1 TLR2	0.132954917239859,2,146,9.35830479452055,"Regulation of protein secretion "," http://amigo.geneontology.org/amigo/term/GO:0050708"," ICA1 TLR2"
0.132954917239859	2	146	935830479452055	Ubiquitin mediated proteolysis	http://www.genome.jp/kegg-bin/show_pathway?bta04120	UBA6 CUL1	0.132954917239859,2,146,9.35830479452055,"Ubiquitin mediated proteolysis","http://www.genome.jp/kegg-bin/show_pathway?bta04120 "," UBA6 CUL1"
0.134421024249081	3	394	520169733502538	Ubiquitin-like protein transferase activity	http://amigo.geneontology.org/amigo/term/GO:0019787	CUL1 KCMF1 RNF180	0.134421024249081,3,394,5.20169733502538,"Ubiquitin-like protein transferase activity "," http://amigo.geneontology.org/amigo/term/GO:0019787"," CUL1 KCMF1 RNF180"
0.13567183928563	1	14	48796875	MyD88-dependent toll-like receptor signaling pathway	http://amigo.geneontology.org/amigo/term/GO:0002755	TLR2	0.13567183928563,1,14,48.796875,"MyD88-dependent toll-like receptor signaling pathway "," http://amigo.geneontology.org/amigo/term/GO:0002755"," TLR2"
0.13567183928563	3	398	514941896984925	Behavior	http://amigo.geneontology.org/amigo/term/GO:0007610	UBA6 EIF4G1 RNF180	0.13567183928563,3,398,5.14941896984925,"Behavior "," http://amigo.geneontology.org/amigo/term/GO:0007610"," UBA6 EIF4G1 RNF180"
0.13567183928563	1	14	48796875	Seminiferous tubule development	http://amigo.geneontology.org/amigo/term/GO:0072520	WDR48	0.13567183928563,1,14,48.796875,"Seminiferous tubule development "," http://amigo.geneontology.org/amigo/term/GO:0072520"," WDR48"
0.13567183928563	1	14	48796875	Positive regulation of protein depolymerization	http://amigo.geneontology.org/amigo/term/GO:1901881	NES	0.13567183928563,1,14,48.796875,"Positive regulation of protein depolymerization "," http://amigo.geneontology.org/amigo/term/GO:1901881"," NES"
0.13567183928563	1	14	48796875	Phagocytic vesicle membrane	http://amigo.geneontology.org/amigo/term/GO:0030670	TLR2	0.13567183928563,1,14,48.796875,"Phagocytic vesicle membrane "," http://amigo.geneontology.org/amigo/term/GO:0030670"," TLR2"
0.13567183928563	1	14	48796875	DNA polymerase binding	http://amigo.geneontology.org/amigo/term/GO:0070182	NAT10	0.13567183928563,1,14,48.796875,"DNA polymerase binding "," http://amigo.geneontology.org/amigo/term/GO:0070182"," NAT10"
0.137631879832514	4	726	376394628099174	Positive regulation of protein modification process	http://amigo.geneontology.org/amigo/term/GO:0031401	WDR48 CHTOP EIF4G1 RNF180	0.137631879832514,4,726,3.76394628099174,"Positive regulation of protein modification process "," http://amigo.geneontology.org/amigo/term/GO:0031401"," WDR48 CHTOP EIF4G1 RNF180"
0.137631879832514	2	152	898889802631579	Cell adhesion molecules	http://www.genome.jp/kegg-bin/show_pathway?bta04514	BOLA-DRA	0.137631879832514,2,152,8.98889802631579,"Cell adhesion molecules","http://www.genome.jp/kegg-bin/show_pathway?bta04514 "," BOLA-DRA "
0.137842364413552	2	154	887215909090909	Nucleobase-containing compound transport	http://amigo.geneontology.org/amigo/term/GO:0015931	CHTOP YBX1	0.137842364413552,2,154,8.87215909090909,"Nucleobase-containing compound transport "," http://amigo.geneontology.org/amigo/term/GO:0015931"," CHTOP YBX1"
0.137842364413552	2	154	887215909090909	Regulation of protein ubiquitination	http://amigo.geneontology.org/amigo/term/GO:0031396	WDR48 RNF180	0.137842364413552,2,154,8.87215909090909,"Regulation of protein ubiquitination "," http://amigo.geneontology.org/amigo/term/GO:0031396"," WDR48 RNF180"
0.137842364413552	1	15	4554375	MiRNA mediated inhibition of translation	http://amigo.geneontology.org/amigo/term/GO:0035278	EIF4G1	0.137842364413552,1,15,45.54375,"MiRNA mediated inhibition of translation "," http://amigo.geneontology.org/amigo/term/GO:0035278"," EIF4G1"
0.137842364413552	1	15	4554375	Negative regulation of translation, ncRNA-mediated	http://amigo.geneontology.org/amigo/term/GO:0040033	EIF4G1	0.137842364413552,1,15,45.54375,"Negative regulation of translation, ncRNA-mediated "," http://amigo.geneontology.org/amigo/term/GO:0040033"," EIF4G1"
0.137842364413552	1	15	4554375	Regulation of translation in response to stress	http://amigo.geneontology.org/amigo/term/GO:0043555	EIF4G1	0.137842364413552,1,15,45.54375,"Regulation of translation in response to stress "," http://amigo.geneontology.org/amigo/term/GO:0043555"," EIF4G1"
0.137842364413552	1	15	4554375	Regulation of translation, ncRNA-mediated	http://amigo.geneontology.org/amigo/term/GO:0045974	EIF4G1	0.137842364413552,1,15,45.54375,"Regulation of translation, ncRNA-mediated "," http://amigo.geneontology.org/amigo/term/GO:0045974"," EIF4G1"
0.137842364413552	1	15	4554375	Negative regulation of cellular senescence	http://amigo.geneontology.org/amigo/term/GO:2000773	YBX1	0.137842364413552,1,15,45.54375,"Negative regulation of cellular senescence "," http://amigo.geneontology.org/amigo/term/GO:2000773"," YBX1"
0.137842364413552	1	15	4554375	Pattern recognition receptor activity	http://amigo.geneontology.org/amigo/term/GO:0038187	TLR2	0.137842364413552,1,15,45.54375,"Pattern recognition receptor activity "," http://amigo.geneontology.org/amigo/term/GO:0038187"," TLR2"
0.137842364413552	1	15	4554375	Lipopeptide binding	http://amigo.geneontology.org/amigo/term/GO:0071723	TLR2	0.137842364413552,1,15,45.54375,"Lipopeptide binding "," http://amigo.geneontology.org/amigo/term/GO:0071723"," TLR2"
0.137842364413552	2	155	881491935483871	Hepatitis C	http://www.genome.jp/kegg-bin/show_pathway?bta05160	DDX58 BAX	0.137842364413552,2,155,8.81491935483871,"Hepatitis C","http://www.genome.jp/kegg-bin/show_pathway?bta05160 "," DDX58 BAX"
0.142090769744658	1	16	42697265625	Negative regulators of DDX58/IFIH1 signaling	https://reactome.org/download/current	DDX58	0.142090769744658,1,16,42.697265625,"Negative regulators of DDX58/IFIH1 signaling","https://reactome.org/download/current"," DDX58"
0.142090769744658	1	16	42697265625	WP3239 TP53 Network	http://www.wikipathways.org/instance/WP3239_r80865	BAX	0.142090769744658,1,16,42.697265625,"WP3239 TP53 Network","http://www.wikipathways.org/instance/WP3239_r80865"," BAX"
0.142090769744658	1	16	42697265625	Transcriptional regulation by RUNX2	https://reactome.org/download/current	CUL1	0.142090769744658,1,16,42.697265625,"Transcriptional regulation by RUNX2","https://reactome.org/download/current"," CUL1"
0.142090769744658	2	159	859316037735849	Regulation of leukocyte mediated immunity	http://amigo.geneontology.org/amigo/term/GO:0002703	DDX58 BOLA-DRA	0.142090769744658,2,159,8.59316037735849,"Regulation of leukocyte mediated immunity "," http://amigo.geneontology.org/amigo/term/GO:0002703"," DDX58 BOLA-DRA"
0.142090769744658	1	16	42697265625	Negative regulation of telomere maintenance via telomerase	http://amigo.geneontology.org/amigo/term/GO:0032211	NAT10	0.142090769744658,1,16,42.697265625,"Negative regulation of telomere maintenance via telomerase "," http://amigo.geneontology.org/amigo/term/GO:0032211"," NAT10"
0.142090769744658	1	16	42697265625	Myeloid leukocyte cytokine production	http://amigo.geneontology.org/amigo/term/GO:0061082	DDX58	0.142090769744658,1,16,42.697265625,"Myeloid leukocyte cytokine production "," http://amigo.geneontology.org/amigo/term/GO:0061082"," DDX58"
0.142090769744658	2	159	859316037735849	Non-alcoholic fatty liver disease	http://www.genome.jp/kegg-bin/show_pathway?bta04932	BAX	0.142090769744658,2,159,8.59316037735849,"Non-alcoholic fatty liver disease","http://www.genome.jp/kegg-bin/show_pathway?bta04932 "," BAX "
0.142090769744658	1	16	42697265625	P00054 Toll receptor signaling pathway	ftp://ftp.pantherdb.org/pathway/current_release	TLR2	0.142090769744658,1,16,42.697265625,"P00054 Toll receptor signaling pathway","ftp://ftp.pantherdb.org/pathway/current_release"," TLR2"
0.144569664893883	2	163	838228527607362	Positive regulation of immune effector process	http://amigo.geneontology.org/amigo/term/GO:0002699	DDX58 BOLA-DRA	0.144569664893883,2,163,8.38228527607362,"Positive regulation of immune effector process "," http://amigo.geneontology.org/amigo/term/GO:0002699"," DDX58 BOLA-DRA"
0.145625534704709	2	164	83311737804878	Neddylation	https://reactome.org/download/current	TULP4 CUL1	0.145625534704709,2,164,8.3311737804878,"Neddylation","https://reactome.org/download/current"," TULP4 CUL1"
0.147229431966725	1	17	401856617647059	SCFSkp2-mediated degradation of p27/p21	https://reactome.org/download/current	CUL1	0.147229431966725,1,17,40.1856617647059,"SCFSkp2-mediated degradation of p27/p21","https://reactome.org/download/current"," CUL1"
0.147229431966725	1	17	401856617647059	Neurotransmitter metabolic process	http://amigo.geneontology.org/amigo/term/GO:0042133	HNMT	0.147229431966725,1,17,40.1856617647059,"Neurotransmitter metabolic process "," http://amigo.geneontology.org/amigo/term/GO:0042133"," HNMT"
0.147229431966725	1	17	401856617647059	Indole-containing compound metabolic process	http://amigo.geneontology.org/amigo/term/GO:0042430	RNF180	0.147229431966725,1,17,40.1856617647059,"Indole-containing compound metabolic process "," http://amigo.geneontology.org/amigo/term/GO:0042430"," RNF180"
0.147229431966725	1	17	401856617647059	Detection of external biotic stimulus	http://amigo.geneontology.org/amigo/term/GO:0098581	TLR2	0.147229431966725,1,17,40.1856617647059,"Detection of external biotic stimulus "," http://amigo.geneontology.org/amigo/term/GO:0098581"," TLR2"
0.147597931340724	2	167	81815119760479	Protein processing in endoplasmic reticulum	http://www.genome.jp/kegg-bin/show_pathway?bta04141	CUL1 BAX	0.147597931340724,2,167,8.1815119760479,"Protein processing in endoplasmic reticulum","http://www.genome.jp/kegg-bin/show_pathway?bta04141 "," CUL1 BAX"
0.14767704547955	3	432	4744140625	Cytokine Signaling in Immune system	https://reactome.org/download/current	DDX58 CUL1 EIF4G1	0.14767704547955,3,432,4.744140625,"Cytokine Signaling in Immune system","https://reactome.org/download/current"," DDX58 CUL1 EIF4G1"
0.14969491250682	2	169	808468934911243	Hepatocellular carcinoma	http://www.genome.jp/kegg-bin/show_pathway?bta05225	GSTO1 BAX	0.14969491250682,2,169,8.08468934911243,"Hepatocellular carcinoma","http://www.genome.jp/kegg-bin/show_pathway?bta05225 "," GSTO1 BAX"
0.149749415123259	4	773	353509055627426	Ribonucleoprotein complex	http://amigo.geneontology.org/amigo/term/GO:1990904	EIF4G1 RPL35A NAT10 YBX1	0.149749415123259,4,773,3.53509055627426,"Ribonucleoprotein complex "," http://amigo.geneontology.org/amigo/term/GO:1990904"," EIF4G1 RPL35A NAT10 YBX1"
0.151520212240862	1	18	37953125	Regulation of regulatory T cell differentiation	http://amigo.geneontology.org/amigo/term/GO:0045589	BOLA-DRA	0.151520212240862,1,18,37.953125,"Regulation of regulatory T cell differentiation "," http://amigo.geneontology.org/amigo/term/GO:0045589"," BOLA-DRA"
0.151520212240862	1	18	37953125	Regulation of spindle assembly	http://amigo.geneontology.org/amigo/term/GO:0090169	DYNC1H1	0.151520212240862,1,18,37.953125,"Regulation of spindle assembly "," http://amigo.geneontology.org/amigo/term/GO:0090169"," DYNC1H1"
0.151520212240862	1	18	37953125	Negative regulation of cell aging	http://amigo.geneontology.org/amigo/term/GO:0090344	YBX1	0.151520212240862,1,18,37.953125,"Negative regulation of cell aging "," http://amigo.geneontology.org/amigo/term/GO:0090344"," YBX1"
0.151644652210884	2	172	794367732558139	Positive regulation of cell cycle process	http://amigo.geneontology.org/amigo/term/GO:0090068	EIF4G1 DYNC1H1	0.151644652210884,2,172,7.94367732558139,"Positive regulation of cell cycle process "," http://amigo.geneontology.org/amigo/term/GO:0090068"," EIF4G1 DYNC1H1"
0.152194388671582	1	19	359555921052632	Activation of NF-kappaB in B cells	https://reactome.org/download/current	CUL1	0.152194388671582,1,19,35.9555921052632,"Activation of NF-kappaB in B cells","https://reactome.org/download/current"," CUL1"
0.152194388671582	1	19	359555921052632	Antigen processing and presentation of endogenous peptide antigen	http://amigo.geneontology.org/amigo/term/GO:0002483	BOLA-DRA	0.152194388671582,1,19,35.9555921052632,"Antigen processing and presentation of endogenous peptide antigen "," http://amigo.geneontology.org/amigo/term/GO:0002483"," BOLA-DRA"
0.152194388671582	1	19	359555921052632	Nuclear migration	http://amigo.geneontology.org/amigo/term/GO:0007097	DYNC1H1	0.152194388671582,1,19,35.9555921052632,"Nuclear migration "," http://amigo.geneontology.org/amigo/term/GO:0007097"," DYNC1H1"
0.152194388671582	2	177	771927966101695	Negative regulation of cellular catabolic process	http://amigo.geneontology.org/amigo/term/GO:0031330	EIF4G1 YBX1	0.152194388671582,2,177,7.71927966101695,"Negative regulation of cellular catabolic process "," http://amigo.geneontology.org/amigo/term/GO:0031330"," EIF4G1 YBX1"
0.152194388671582	1	19	359555921052632	Cellular biogenic amine catabolic process	http://amigo.geneontology.org/amigo/term/GO:0042402	HNMT	0.152194388671582,1,19,35.9555921052632,"Cellular biogenic amine catabolic process "," http://amigo.geneontology.org/amigo/term/GO:0042402"," HNMT"
0.152194388671582	1	19	359555921052632	Positive regulation of CD4-positive, alpha-beta T cell differentiation	http://amigo.geneontology.org/amigo/term/GO:0043372	BOLA-DRA	0.152194388671582,1,19,35.9555921052632,"Positive regulation of CD4-positive, alpha-beta T cell differentiation "," http://amigo.geneontology.org/amigo/term/GO:0043372"," BOLA-DRA"
0.152194388671582	6	1604	255544731920199	Cellular catabolic process	http://amigo.geneontology.org/amigo/term/GO:0044248	UBA6 CUL1 EIF4G1 HNMT YBX1 RNF180	0.152194388671582,6,1604,2.55544731920199,"Cellular catabolic process "," http://amigo.geneontology.org/amigo/term/GO:0044248"," UBA6 CUL1 EIF4G1 HNMT YBX1 RNF180"
0.152194388671582	2	177	771927966101695	Positive regulation of cytoskeleton organization	http://amigo.geneontology.org/amigo/term/GO:0051495	NES DYNC1H1	0.152194388671582,2,177,7.71927966101695,"Positive regulation of cytoskeleton organization "," http://amigo.geneontology.org/amigo/term/GO:0051495"," NES DYNC1H1"
0.152194388671582	1	19	359555921052632	Telomerase holoenzyme complex	http://amigo.geneontology.org/amigo/term/GO:0005697	NAT10	0.152194388671582,1,19,35.9555921052632,"Telomerase holoenzyme complex "," http://amigo.geneontology.org/amigo/term/GO:0005697"," NAT10"
0.152194388671582	1	19	359555921052632	Cytoplasmic dynein complex	http://amigo.geneontology.org/amigo/term/GO:0005868	DYNC1H1	0.152194388671582,1,19,35.9555921052632,"Cytoplasmic dynein complex "," http://amigo.geneontology.org/amigo/term/GO:0005868"," DYNC1H1"
0.152194388671582	3	448	457470703125	Plasma membrane protein complex	http://amigo.geneontology.org/amigo/term/GO:0098797	TLR2 BOLA-DRA	0.152194388671582,3,448,4.57470703125,"Plasma membrane protein complex "," http://amigo.geneontology.org/amigo/term/GO:0098797"," TLR2 BOLA-DRA "
0.152194388671582	1	19	359555921052632	Minus-end-directed microtubule motor activity	http://amigo.geneontology.org/amigo/term/GO:0008569	DYNC1H1	0.152194388671582,1,19,35.9555921052632,"Minus-end-directed microtubule motor activity "," http://amigo.geneontology.org/amigo/term/GO:0008569"," DYNC1H1"
0.152194388671582	2	175	78075	Bta-mir-1584-3p target gene	https://www.mirnet.ca	TULP4 MCM3	0.152194388671582,2,175,7.8075,"Bta-mir-1584-3p target gene","https://www.mirnet.ca"," TULP4 MCM3"
0.155717926750501	2	186	734576612903226	Major pathway of rRNA processing in the nucleolus and cytosol	https://reactome.org/download/current	KRR1 RPL35A	0.155717926750501,2,186,7.34576612903226,"Major pathway of rRNA processing in the nucleolus and cytosol","https://reactome.org/download/current"," KRR1 RPL35A"
0.155717926750501	2	186	734576612903226	RRNA processing	https://reactome.org/download/current	KRR1 RPL35A	0.155717926750501,2,186,7.34576612903226,"RRNA processing","https://reactome.org/download/current"," KRR1 RPL35A"
0.155717926750501	2	186	734576612903226	RRNA processing in the nucleus and cytosol	https://reactome.org/download/current	KRR1 RPL35A	0.155717926750501,2,186,7.34576612903226,"RRNA processing in the nucleus and cytosol","https://reactome.org/download/current"," KRR1 RPL35A"
0.155717926750501	1	21	3253125	Cyclin E associated events during G1/S transition	https://reactome.org/download/current	CUL1	0.155717926750501,1,21,32.53125,"Cyclin E associated events during G1/S transition","https://reactome.org/download/current"," CUL1"
0.155717926750501	1	20	341578125	Amine catabolic process	http://amigo.geneontology.org/amigo/term/GO:0009310	HNMT	0.155717926750501,1,20,34.1578125,"Amine catabolic process "," http://amigo.geneontology.org/amigo/term/GO:0009310"," HNMT"
0.155717926750501	1	20	341578125	P-body assembly	http://amigo.geneontology.org/amigo/term/GO:0033962	DYNC1H1	0.155717926750501,1,20,34.1578125,"P-body assembly "," http://amigo.geneontology.org/amigo/term/GO:0033962"," DYNC1H1"
0.155717926750501	1	21	3253125	Positive regulation of toll-like receptor signaling pathway	http://amigo.geneontology.org/amigo/term/GO:0034123	TLR2	0.155717926750501,1,21,32.53125,"Positive regulation of toll-like receptor signaling pathway "," http://amigo.geneontology.org/amigo/term/GO:0034123"," TLR2"
0.155717926750501	1	20	341578125	Regulatory T cell differentiation	http://amigo.geneontology.org/amigo/term/GO:0045066	BOLA-DRA	0.155717926750501,1,20,34.1578125,"Regulatory T cell differentiation "," http://amigo.geneontology.org/amigo/term/GO:0045066"," BOLA-DRA"
0.155717926750501	2	184	742561141304348	Cognition	http://amigo.geneontology.org/amigo/term/GO:0050890	UBA6 BOLA-DRA	0.155717926750501,2,184,7.42561141304348,"Cognition "," http://amigo.geneontology.org/amigo/term/GO:0050890"," UBA6 BOLA-DRA"
0.155717926750501	1	20	341578125	Negative regulation of striated muscle cell differentiation	http://amigo.geneontology.org/amigo/term/GO:0051154	YBX1	0.155717926750501,1,20,34.1578125,"Negative regulation of striated muscle cell differentiation "," http://amigo.geneontology.org/amigo/term/GO:0051154"," YBX1"
0.155717926750501	1	21	3253125	Nucleus localization	http://amigo.geneontology.org/amigo/term/GO:0051647	DYNC1H1	0.155717926750501,1,21,32.53125,"Nucleus localization "," http://amigo.geneontology.org/amigo/term/GO:0051647"," DYNC1H1"
0.155717926750501	2	184	742561141304348	Regulation of protein modification by small protein conjugation or removal	http://amigo.geneontology.org/amigo/term/GO:1903320	WDR48 RNF180	0.155717926750501,2,184,7.42561141304348,"Regulation of protein modification by small protein conjugation or removal "," http://amigo.geneontology.org/amigo/term/GO:1903320"," WDR48 RNF180"
0.155717926750501	1	20	341578125	Negative regulation of telomere maintenance via telomere lengthening	http://amigo.geneontology.org/amigo/term/GO:1904357	NAT10	0.155717926750501,1,20,34.1578125,"Negative regulation of telomere maintenance via telomere lengthening "," http://amigo.geneontology.org/amigo/term/GO:1904357"," NAT10"
0.155717926750501	3	465	440745967741935	Cytoplasmic vesicle membrane	http://amigo.geneontology.org/amigo/term/GO:0030659	ICA1 TLR2 BOLA-DRA	0.155717926750501,3,465,4.40745967741935,"Cytoplasmic vesicle membrane "," http://amigo.geneontology.org/amigo/term/GO:0030659"," ICA1 TLR2 BOLA-DRA"
0.155717926750501	2	182	750721153846154	Cytoplasmic ribonucleoprotein granule	http://amigo.geneontology.org/amigo/term/GO:0036464	CHTOP YBX1	0.155717926750501,2,182,7.50721153846154,"Cytoplasmic ribonucleoprotein granule "," http://amigo.geneontology.org/amigo/term/GO:0036464"," CHTOP YBX1"
0.155717926750501	2	185	738547297297297	Serine-type endopeptidase activity	http://amigo.geneontology.org/amigo/term/GO:0004252	HP SEC11C	0.155717926750501,2,185,7.38547297297297,"Serine-type endopeptidase activity "," http://amigo.geneontology.org/amigo/term/GO:0004252"," HP SEC11C"
0.155717926750501	1	21	3253125	Polysaccharide binding	http://amigo.geneontology.org/amigo/term/GO:0030247	BOLA-DRA	0.155717926750501,1,21,32.53125,"Polysaccharide binding "," http://amigo.geneontology.org/amigo/term/GO:0030247"," BOLA-DRA"
0.155717926750501	2	183	746618852459016	Peptide binding	http://amigo.geneontology.org/amigo/term/GO:0042277	TLR2 BOLA-DRA	0.155717926750501,2,183,7.46618852459016,"Peptide binding "," http://amigo.geneontology.org/amigo/term/GO:0042277"," TLR2 BOLA-DRA"
0.155717926750501	1	20	341578125	Dynein intermediate chain binding	http://amigo.geneontology.org/amigo/term/GO:0045505	DYNC1H1	0.155717926750501,1,20,34.1578125,"Dynein intermediate chain binding "," http://amigo.geneontology.org/amigo/term/GO:0045505"," DYNC1H1"
0.155717926750501	1	21	3253125	Histidine metabolism	http://www.genome.jp/kegg-bin/show_pathway?bta00340	HNMT	0.155717926750501,1,21,32.53125,"Histidine metabolism","http://www.genome.jp/kegg-bin/show_pathway?bta00340 "," HNMT"
0.157583943606033	1	22	310525568181818	HSF1-dependent transactivation	https://reactome.org/download/current	HSBP1	0.157583943606033,1,22,31.0525568181818,"HSF1-dependent transactivation","https://reactome.org/download/current"," HSBP1"
0.157583943606033	1	22	310525568181818	WP997 Cytokines and Inflammatory Response	http://www.wikipathways.org/instance/WP997_r86911	BOLA-DRA	0.157583943606033,1,22,31.0525568181818,"WP997 Cytokines and Inflammatory Response","http://www.wikipathways.org/instance/WP997_r86911"," BOLA-DRA"
0.157583943606033	1	22	310525568181818	WP3160 IL1 and megakaryotyces in obesity	http://www.wikipathways.org/instance/WP3160_r88663	TLR2	0.157583943606033,1,22,31.0525568181818,"WP3160 IL1 and megakaryotyces in obesity","http://www.wikipathways.org/instance/WP3160_r88663"," TLR2"
0.157583943606033	1	22	310525568181818	Cyclin A:Cdk2-associated events at S phase entry	https://reactome.org/download/current	CUL1	0.157583943606033,1,22,31.0525568181818,"Cyclin A:Cdk2-associated events at S phase entry","https://reactome.org/download/current"," CUL1"
0.157583943606033	1	22	310525568181818	Acute-phase response	http://amigo.geneontology.org/amigo/term/GO:0006953	HP	0.157583943606033,1,22,31.0525568181818,"Acute-phase response "," http://amigo.geneontology.org/amigo/term/GO:0006953"," HP"
0.157583943606033	1	22	310525568181818	Positive regulation of ATPase activity	http://amigo.geneontology.org/amigo/term/GO:0032781	CHTOP	0.157583943606033,1,22,31.0525568181818,"Positive regulation of ATPase activity "," http://amigo.geneontology.org/amigo/term/GO:0032781"," CHTOP"
0.157583943606033	2	189	722916666666667	Regulation of microtubule-based process	http://amigo.geneontology.org/amigo/term/GO:0032886	DYNC1H1 NAT10	0.157583943606033,2,189,7.22916666666667,"Regulation of microtubule-based process "," http://amigo.geneontology.org/amigo/term/GO:0032886"," DYNC1H1 NAT10"
0.157583943606033	1	22	310525568181818	Stress granule assembly	http://amigo.geneontology.org/amigo/term/GO:0034063	DYNC1H1	0.157583943606033,1,22,31.0525568181818,"Stress granule assembly "," http://amigo.geneontology.org/amigo/term/GO:0034063"," DYNC1H1"
0.157583943606033	1	22	310525568181818	Positive regulation of CD4-positive, alpha-beta T cell activation	http://amigo.geneontology.org/amigo/term/GO:2000516	BOLA-DRA	0.157583943606033,1,22,31.0525568181818,"Positive regulation of CD4-positive, alpha-beta T cell activation "," http://amigo.geneontology.org/amigo/term/GO:2000516"," BOLA-DRA"
0.157583943606033	1	22	310525568181818	Dynein light intermediate chain binding	http://amigo.geneontology.org/amigo/term/GO:0051959	DYNC1H1	0.157583943606033,1,22,31.0525568181818,"Dynein light intermediate chain binding "," http://amigo.geneontology.org/amigo/term/GO:0051959"," DYNC1H1"
0.158732000157455	3	477	429658018867925	Regulation of cell cycle process	http://amigo.geneontology.org/amigo/term/GO:0010564	EIF4G1 DYNC1H1 NAT10	0.158732000157455,3,477,4.29658018867925,"Regulation of cell cycle process "," http://amigo.geneontology.org/amigo/term/GO:0010564"," EIF4G1 DYNC1H1 NAT10"
0.15901158081202	2	193	707933937823834	Late endosome	http://amigo.geneontology.org/amigo/term/GO:0005770	WDR48 BOLA-DRA	0.15901158081202,2,193,7.07933937823834,"Late endosome "," http://amigo.geneontology.org/amigo/term/GO:0005770"," WDR48 BOLA-DRA"
0.15901158081202	2	193	707933937823834	Ribonucleoprotein granule	http://amigo.geneontology.org/amigo/term/GO:0035770	CHTOP YBX1	0.15901158081202,2,193,7.07933937823834,"Ribonucleoprotein granule "," http://amigo.geneontology.org/amigo/term/GO:0035770"," CHTOP YBX1"
0.159319878681819	1	23	297024456521739	WP3209 Arylhydrocarbon receptor (AhR) signaling pathway	http://www.wikipathways.org/instance/WP3209_r80804	BAX	0.159319878681819,1,23,29.7024456521739,"WP3209 Arylhydrocarbon receptor (AhR) signaling pathway","http://www.wikipathways.org/instance/WP3209_r80804"," BAX"
0.159319878681819	1	23	297024456521739	Bta-mir-133b target gene	https://www.mirnet.ca	MCM3	0.159319878681819,1,23,29.7024456521739,"Bta-mir-133b target gene","https://www.mirnet.ca"," MCM3"
0.159319878681819	1	23	297024456521739	Positive regulation of G1/S transition of mitotic cell cycle	http://amigo.geneontology.org/amigo/term/GO:1900087	EIF4G1	0.159319878681819,1,23,29.7024456521739,"Positive regulation of G1/S transition of mitotic cell cycle "," http://amigo.geneontology.org/amigo/term/GO:1900087"," EIF4G1"
0.159319878681819	3	481	426084979209979	Vesicle membrane	http://amigo.geneontology.org/amigo/term/GO:0012506	ICA1 TLR2 BOLA-DRA	0.159319878681819,3,481,4.26084979209979,"Vesicle membrane "," http://amigo.geneontology.org/amigo/term/GO:0012506"," ICA1 TLR2 BOLA-DRA"
0.159319878681819	1	23	297024456521739	Methyl-CpG binding	http://amigo.geneontology.org/amigo/term/GO:0008327	CHTOP	0.159319878681819,1,23,29.7024456521739,"Methyl-CpG binding "," http://amigo.geneontology.org/amigo/term/GO:0008327"," CHTOP"
0.159319878681819	1	23	297024456521739	MiRNA binding	http://amigo.geneontology.org/amigo/term/GO:0035198	YBX1	0.159319878681819,1,23,29.7024456521739,"MiRNA binding "," http://amigo.geneontology.org/amigo/term/GO:0035198"," YBX1"
0.159319878681819	1	23	297024456521739	Protein export	http://www.genome.jp/kegg-bin/show_pathway?bta03060	SEC11C	0.159319878681819,1,23,29.7024456521739,"Protein export","http://www.genome.jp/kegg-bin/show_pathway?bta03060 "," SEC11C"
0.160330456446306	2	197	693559644670051	Defense response to virus	http://amigo.geneontology.org/amigo/term/GO:0051607	DDX58 TLR2	0.160330456446306,2,197,6.93559644670051,"Defense response to virus "," http://amigo.geneontology.org/amigo/term/GO:0051607"," DDX58 TLR2"
0.160330456446306	2	197	693559644670051	Defense response to symbiont	http://amigo.geneontology.org/amigo/term/GO:0140546	DDX58 TLR2	0.160330456446306,2,197,6.93559644670051,"Defense response to symbiont "," http://amigo.geneontology.org/amigo/term/GO:0140546"," DDX58 TLR2"
0.160436575745972	1	24	2846484375	MTORC1-mediated signalling	https://reactome.org/download/current	EIF4G1	0.160436575745972,1,24,28.46484375,"MTORC1-mediated signalling","https://reactome.org/download/current"," EIF4G1"
0.160436575745972	1	24	2846484375	Behavioral fear response	http://amigo.geneontology.org/amigo/term/GO:0001662	EIF4G1	0.160436575745972,1,24,28.46484375,"Behavioral fear response "," http://amigo.geneontology.org/amigo/term/GO:0001662"," EIF4G1"
0.160436575745972	1	24	2846484375	Positive regulation of protein-containing complex disassembly	http://amigo.geneontology.org/amigo/term/GO:0043243	NES	0.160436575745972,1,24,28.46484375,"Positive regulation of protein-containing complex disassembly "," http://amigo.geneontology.org/amigo/term/GO:0043243"," NES"
0.160436575745972	1	24	2846484375	Regulation of T-helper cell differentiation	http://amigo.geneontology.org/amigo/term/GO:0045622	BOLA-DRA	0.160436575745972,1,24,28.46484375,"Regulation of T-helper cell differentiation "," http://amigo.geneontology.org/amigo/term/GO:0045622"," BOLA-DRA"
0.160436575745972	1	24	2846484375	Positive regulation of gene silencing by miRNA	http://amigo.geneontology.org/amigo/term/GO:2000637	EIF4G1	0.160436575745972,1,24,28.46484375,"Positive regulation of gene silencing by miRNA "," http://amigo.geneontology.org/amigo/term/GO:2000637"," EIF4G1"
0.160436575745972	2	199	6865891959799	Membrane raft	http://amigo.geneontology.org/amigo/term/GO:0045121	TLR2 CD48	0.160436575745972,2,199,6.865891959799,"Membrane raft "," http://amigo.geneontology.org/amigo/term/GO:0045121"," TLR2 CD48"
0.160436575745972	2	199	6865891959799	Membrane microdomain	http://amigo.geneontology.org/amigo/term/GO:0098857	TLR2 CD48	0.160436575745972,2,199,6.865891959799,"Membrane microdomain "," http://amigo.geneontology.org/amigo/term/GO:0098857"," TLR2 CD48"
0.160436575745972	2	199	6865891959799	Serine-type peptidase activity	http://amigo.geneontology.org/amigo/term/GO:0008236	HP SEC11C	0.160436575745972,2,199,6.865891959799,"Serine-type peptidase activity "," http://amigo.geneontology.org/amigo/term/GO:0008236"," HP SEC11C"
0.160436575745972	1	24	2846484375	Translation initiation factor binding	http://amigo.geneontology.org/amigo/term/GO:0031369	EIF4G1	0.160436575745972,1,24,28.46484375,"Translation initiation factor binding "," http://amigo.geneontology.org/amigo/term/GO:0031369"," EIF4G1"
0.162448855981053	1	25	2732625	Deadenylation of mRNA	https://reactome.org/download/current	EIF4G1	0.162448855981053,1,25,27.32625,"Deadenylation of mRNA","https://reactome.org/download/current"," EIF4G1"
0.162448855981053	1	25	2732625	Positive regulation of T cell mediated cytotoxicity	http://amigo.geneontology.org/amigo/term/GO:0001916	BOLA-DRA	0.162448855981053,1,25,27.32625,"Positive regulation of T cell mediated cytotoxicity "," http://amigo.geneontology.org/amigo/term/GO:0001916"," BOLA-DRA"
0.162448855981053	1	25	2732625	Behavioral defense response	http://amigo.geneontology.org/amigo/term/GO:0002209	EIF4G1	0.162448855981053,1,25,27.32625,"Behavioral defense response "," http://amigo.geneontology.org/amigo/term/GO:0002209"," EIF4G1"
0.162448855981053	1	25	2732625	Detection of biotic stimulus	http://amigo.geneontology.org/amigo/term/GO:0009595	TLR2	0.162448855981053,1,25,27.32625,"Detection of biotic stimulus "," http://amigo.geneontology.org/amigo/term/GO:0009595"," TLR2"
0.162448855981053	1	25	2732625	Positive regulation of posttranscriptional gene silencing	http://amigo.geneontology.org/amigo/term/GO:0060148	EIF4G1	0.162448855981053,1,25,27.32625,"Positive regulation of posttranscriptional gene silencing "," http://amigo.geneontology.org/amigo/term/GO:0060148"," EIF4G1"
0.162448855981053	1	25	2732625	Endocytic vesicle membrane	http://amigo.geneontology.org/amigo/term/GO:0030666	TLR2	0.162448855981053,1,25,27.32625,"Endocytic vesicle membrane "," http://amigo.geneontology.org/amigo/term/GO:0030666"," TLR2"
0.162448855981053	1	25	2732625	Axon cytoplasm	http://amigo.geneontology.org/amigo/term/GO:1904115	DYNC1H1	0.162448855981053,1,25,27.32625,"Axon cytoplasm "," http://amigo.geneontology.org/amigo/term/GO:1904115"," DYNC1H1"
0.162448855981053	1	25	2732625	Glutathione transferase activity	http://amigo.geneontology.org/amigo/term/GO:0004364	GSTO1	0.162448855981053,1,25,27.32625,"Glutathione transferase activity "," http://amigo.geneontology.org/amigo/term/GO:0004364"," GSTO1"
0.162448855981053	2	202	676392326732673	Bta-mir-2467-5p target gene	https://www.mirnet.ca	EIF4G1 BAX	0.162448855981053,2,202,6.76392326732673,"Bta-mir-2467-5p target gene","https://www.mirnet.ca"," EIF4G1 BAX"
0.162508839398112	2	205	666493902439024	Serine hydrolase activity	http://amigo.geneontology.org/amigo/term/GO:0017171	HP SEC11C	0.162508839398112,2,205,6.66493902439024,"Serine hydrolase activity "," http://amigo.geneontology.org/amigo/term/GO:0017171"," HP SEC11C"
0.16581283180484	2	208	656881009615385	Translation	https://reactome.org/download/current	EIF4G1 RPL35A	0.16581283180484,2,208,6.56881009615385,"Translation","https://reactome.org/download/current"," EIF4G1 RPL35A"
0.16581283180484	2	208	656881009615385	Protein secretion	http://amigo.geneontology.org/amigo/term/GO:0009306	ICA1 TLR2	0.16581283180484,2,208,6.56881009615385,"Protein secretion "," http://amigo.geneontology.org/amigo/term/GO:0009306"," ICA1 TLR2"
0.16581283180484	1	26	262752403846154	Antigen processing and presentation of exogenous antigen	http://amigo.geneontology.org/amigo/term/GO:0019884	BOLA-DRA	0.16581283180484,1,26,26.2752403846154,"Antigen processing and presentation of exogenous antigen "," http://amigo.geneontology.org/amigo/term/GO:0019884"," BOLA-DRA"
0.16581283180484	1	26	262752403846154	Negative regulation of telomere maintenance	http://amigo.geneontology.org/amigo/term/GO:0032205	NAT10	0.16581283180484,1,26,26.2752403846154,"Negative regulation of telomere maintenance "," http://amigo.geneontology.org/amigo/term/GO:0032205"," NAT10"
0.16581283180484	1	26	262752403846154	Regulation of mitotic spindle organization	http://amigo.geneontology.org/amigo/term/GO:0060236	DYNC1H1	0.16581283180484,1,26,26.2752403846154,"Regulation of mitotic spindle organization "," http://amigo.geneontology.org/amigo/term/GO:0060236"," DYNC1H1"
0.166764328794239	2	210	650625	Establishment of protein localization to extracellular region	http://amigo.geneontology.org/amigo/term/GO:0035592	ICA1 TLR2	0.166764328794239,2,210,6.50625,"Establishment of protein localization to extracellular region "," http://amigo.geneontology.org/amigo/term/GO:0035592"," ICA1 TLR2"
0.167044334473422	1	27	253020833333333	FCERI mediated NF-kB activation	https://reactome.org/download/current	CUL1	0.167044334473422,1,27,25.3020833333333,"FCERI mediated NF-kB activation","https://reactome.org/download/current"," CUL1"
0.167044334473422	1	27	253020833333333	DNA replication initiation	http://amigo.geneontology.org/amigo/term/GO:0006270	MCM3	0.167044334473422,1,27,25.3020833333333,"DNA replication initiation "," http://amigo.geneontology.org/amigo/term/GO:0006270"," MCM3"
0.167044334473422	3	514	398729328793774	Ubiquitin-dependent protein catabolic process	http://amigo.geneontology.org/amigo/term/GO:0006511	UBA6 CUL1 RNF180	0.167044334473422,3,514,3.98729328793774,"Ubiquitin-dependent protein catabolic process "," http://amigo.geneontology.org/amigo/term/GO:0006511"," UBA6 CUL1 RNF180"
0.167044334473422	1	27	253020833333333	Catecholamine metabolic process	http://amigo.geneontology.org/amigo/term/GO:0006584	RNF180	0.167044334473422,1,27,25.3020833333333,"Catecholamine metabolic process "," http://amigo.geneontology.org/amigo/term/GO:0006584"," RNF180"
0.167044334473422	1	27	253020833333333	Catechol-containing compound metabolic process	http://amigo.geneontology.org/amigo/term/GO:0009712	RNF180	0.167044334473422,1,27,25.3020833333333,"Catechol-containing compound metabolic process "," http://amigo.geneontology.org/amigo/term/GO:0009712"," RNF180"
0.167044334473422	4	883	309470554926387	Cell cycle process	http://amigo.geneontology.org/amigo/term/GO:0022402	EIF4G1 NES DYNC1H1 NAT10	0.167044334473422,4,883,3.09470554926387,"Cell cycle process "," http://amigo.geneontology.org/amigo/term/GO:0022402"," EIF4G1 NES DYNC1H1 NAT10"
0.167044334473422	4	882	309821428571429	Cellular macromolecule catabolic process	http://amigo.geneontology.org/amigo/term/GO:0044265	UBA6 CUL1 YBX1 RNF180	0.167044334473422,4,882,3.09821428571429,"Cellular macromolecule catabolic process "," http://amigo.geneontology.org/amigo/term/GO:0044265"," UBA6 CUL1 YBX1 RNF180"
0.167044334473422	1	27	253020833333333	Regulation of presynapse assembly	http://amigo.geneontology.org/amigo/term/GO:1905606	EIF4G1	0.167044334473422,1,27,25.3020833333333,"Regulation of presynapse assembly "," http://amigo.geneontology.org/amigo/term/GO:1905606"," EIF4G1"
0.167044334473422	5	1297	263360158057055	ATP binding	http://amigo.geneontology.org/amigo/term/GO:0005524	DDX58 MCM3 EIF4G1 DYNC1H1 NAT10	0.167044334473422,5,1297,2.63360158057055,"ATP binding "," http://amigo.geneontology.org/amigo/term/GO:0005524"," DDX58 MCM3 EIF4G1 DYNC1H1 NAT10"
0.167044334473422	3	515	397955097087379	Pathways in cancer	http://www.genome.jp/kegg-bin/show_pathway?bta05200	GSTO1 CUL1 BAX	0.167044334473422,3,515,3.97955097087379,"Pathways in cancer","http://www.genome.jp/kegg-bin/show_pathway?bta05200 "," GSTO1 CUL1 BAX"
0.167116550407278	2	214	638463785046729	Protein localization to extracellular region	http://amigo.geneontology.org/amigo/term/GO:0071692	ICA1 TLR2	0.167116550407278,2,214,6.38463785046729,"Protein localization to extracellular region "," http://amigo.geneontology.org/amigo/term/GO:0071692"," ICA1 TLR2"
0.167705343083497	3	517	396415618955513	Centrosome	http://amigo.geneontology.org/amigo/term/GO:0005813	MCM3 HNMT DYNC1H1	0.167705343083497,3,517,3.96415618955513,"Centrosome "," http://amigo.geneontology.org/amigo/term/GO:0005813"," MCM3 HNMT DYNC1H1"
0.167826689113056	1	28	243984375	Downstream TCR signaling	https://reactome.org/download/current	CUL1	0.167826689113056,1,28,24.3984375,"Downstream TCR signaling","https://reactome.org/download/current"," CUL1"
0.167826689113056	1	28	243984375	WP3139 Gastric cancer network 2	http://www.wikipathways.org/instance/WP3139_r87525	CD48	0.167826689113056,1,28,24.3984375,"WP3139 Gastric cancer network 2","http://www.wikipathways.org/instance/WP3139_r87525"," CD48"
0.167826689113056	1	28	243984375	Positive regulation of interferon-beta production	http://amigo.geneontology.org/amigo/term/GO:0032728	DDX58	0.167826689113056,1,28,24.3984375,"Positive regulation of interferon-beta production "," http://amigo.geneontology.org/amigo/term/GO:0032728"," DDX58"
0.167826689113056	1	28	243984375	Energy homeostasis	http://amigo.geneontology.org/amigo/term/GO:0097009	EIF4G1	0.167826689113056,1,28,24.3984375,"Energy homeostasis "," http://amigo.geneontology.org/amigo/term/GO:0097009"," EIF4G1"
0.167826689113056	1	28	243984375	Regulation of presynapse organization	http://amigo.geneontology.org/amigo/term/GO:0099174	EIF4G1	0.167826689113056,1,28,24.3984375,"Regulation of presynapse organization "," http://amigo.geneontology.org/amigo/term/GO:0099174"," EIF4G1"
0.167826689113056	1	28	243984375	Negative regulation of DNA biosynthetic process	http://amigo.geneontology.org/amigo/term/GO:2000279	NAT10	0.167826689113056,1,28,24.3984375,"Negative regulation of DNA biosynthetic process "," http://amigo.geneontology.org/amigo/term/GO:2000279"," NAT10"
0.167826689113056	1	28	243984375	Ubiquitin conjugating enzyme binding	http://amigo.geneontology.org/amigo/term/GO:0031624	RNF180	0.167826689113056,1,28,24.3984375,"Ubiquitin conjugating enzyme binding "," http://amigo.geneontology.org/amigo/term/GO:0031624"," RNF180"
0.167826689113056	2	216	632552083333333	Lipid and atherosclerosis	http://www.genome.jp/kegg-bin/show_pathway?bta05417	TLR2 BAX	0.167826689113056,2,216,6.32552083333333,"Lipid and atherosclerosis","http://www.genome.jp/kegg-bin/show_pathway?bta05417 "," TLR2 BAX"
0.169426676870712	1	29	235571120689655	DDX58/IFIH1-mediated induction of interferon-alpha/beta	https://reactome.org/download/current	DDX58	0.169426676870712,1,29,23.5571120689655,"DDX58/IFIH1-mediated induction of interferon-alpha/beta","https://reactome.org/download/current"," DDX58"
0.169426676870712	1	29	235571120689655	Cyclin D associated events in G1	https://reactome.org/download/current	CUL1	0.169426676870712,1,29,23.5571120689655,"Cyclin D associated events in G1","https://reactome.org/download/current"," CUL1"
0.169426676870712	1	29	235571120689655	G1 Phase	https://reactome.org/download/current	CUL1	0.169426676870712,1,29,23.5571120689655,"G1 Phase","https://reactome.org/download/current"," CUL1"
0.169426676870712	1	29	235571120689655	Regulation of T cell mediated cytotoxicity	http://amigo.geneontology.org/amigo/term/GO:0001914	BOLA-DRA	0.169426676870712,1,29,23.5571120689655,"Regulation of T cell mediated cytotoxicity "," http://amigo.geneontology.org/amigo/term/GO:0001914"," BOLA-DRA"
0.169426676870712	3	525	390375	Modification-dependent protein catabolic process	http://amigo.geneontology.org/amigo/term/GO:0019941	UBA6 CUL1 RNF180	0.169426676870712,3,525,3.90375,"Modification-dependent protein catabolic process "," http://amigo.geneontology.org/amigo/term/GO:0019941"," UBA6 CUL1 RNF180"
0.169426676870712	1	29	235571120689655	Fear response	http://amigo.geneontology.org/amigo/term/GO:0042596	EIF4G1	0.169426676870712,1,29,23.5571120689655,"Fear response "," http://amigo.geneontology.org/amigo/term/GO:0042596"," EIF4G1"
0.169426676870712	1	29	235571120689655	Regulation of spindle organization	http://amigo.geneontology.org/amigo/term/GO:0090224	DYNC1H1	0.169426676870712,1,29,23.5571120689655,"Regulation of spindle organization "," http://amigo.geneontology.org/amigo/term/GO:0090224"," DYNC1H1"
0.169426676870712	1	29	235571120689655	U12-type spliceosomal complex	http://amigo.geneontology.org/amigo/term/GO:0005689	YBX1	0.169426676870712,1,29,23.5571120689655,"U12-type spliceosomal complex "," http://amigo.geneontology.org/amigo/term/GO:0005689"," YBX1"
0.169426676870712	3	528	388156960227273	ATP-dependent activity	http://amigo.geneontology.org/amigo/term/GO:0140657	DDX58 MCM3 DYNC1H1	0.169426676870712,3,528,3.88156960227273,"ATP-dependent activity "," http://amigo.geneontology.org/amigo/term/GO:0140657"," DDX58 MCM3 DYNC1H1"
0.169671844582966	3	530	386692216981132	Modification-dependent macromolecule catabolic process	http://amigo.geneontology.org/amigo/term/GO:0043632	UBA6 CUL1 RNF180	0.169671844582966,3,530,3.86692216981132,"Modification-dependent macromolecule catabolic process "," http://amigo.geneontology.org/amigo/term/GO:0043632"," UBA6 CUL1 RNF180"
0.17025605253939	2	223	612696188340807	Negative regulation of catabolic process	http://amigo.geneontology.org/amigo/term/GO:0009895	EIF4G1 YBX1	0.17025605253939,2,223,6.12696188340807,"Negative regulation of catabolic process "," http://amigo.geneontology.org/amigo/term/GO:0009895"," EIF4G1 YBX1"
0.171137528594503	3	533	384515712945591	Mitotic cell cycle process	http://amigo.geneontology.org/amigo/term/GO:1903047	EIF4G1 NES DYNC1H1	0.171137528594503,3,533,3.84515712945591,"Mitotic cell cycle process "," http://amigo.geneontology.org/amigo/term/GO:1903047"," EIF4G1 NES DYNC1H1"
0.17185850730168	1	30	22771875	Synthesis of active ubiquitinroles of E1 and E2 enzymes	https://reactome.org/download/current	UBA6	0.17185850730168,1,30,22.771875,"Synthesis of active ubiquitinroles of E1 and E2 enzymes","https://reactome.org/download/current"," UBA6"
0.17185850730168	1	30	22771875	Regulation of CD4-positive, alpha-beta T cell differentiation	http://amigo.geneontology.org/amigo/term/GO:0043370	BOLA-DRA	0.17185850730168,1,30,22.771875,"Regulation of CD4-positive, alpha-beta T cell differentiation "," http://amigo.geneontology.org/amigo/term/GO:0043370"," BOLA-DRA"
0.17185850730168	1	30	22771875	Lipopolysaccharide binding	http://amigo.geneontology.org/amigo/term/GO:0001530	TLR2	0.17185850730168,1,30,22.771875,"Lipopolysaccharide binding "," http://amigo.geneontology.org/amigo/term/GO:0001530"," TLR2"
0.17185850730168	1	30	22771875	Circadian rhythm	http://www.genome.jp/kegg-bin/show_pathway?bta04710	CUL1	0.17185850730168,1,30,22.771875,"Circadian rhythm","http://www.genome.jp/kegg-bin/show_pathway?bta04710 "," CUL1"
0.172538779428904	5	1338	255290078475336	Adenyl ribonucleotide binding	http://amigo.geneontology.org/amigo/term/GO:0032559	DDX58 MCM3 EIF4G1 DYNC1H1 NAT10	0.172538779428904,5,1338,2.55290078475336,"Adenyl ribonucleotide binding "," http://amigo.geneontology.org/amigo/term/GO:0032559"," DDX58 MCM3 EIF4G1 DYNC1H1 NAT10"
0.17307800089994	4	917	297996183206107	Supramolecular complex	http://amigo.geneontology.org/amigo/term/GO:0099080	CHTOP NES DYNC1H1 YBX1	0.17307800089994,4,917,2.97996183206107,"Supramolecular complex "," http://amigo.geneontology.org/amigo/term/GO:0099080"," CHTOP NES DYNC1H1 YBX1"
0.173426348631119	2	228	599259868421053	Positive regulation of cell cycle	http://amigo.geneontology.org/amigo/term/GO:0045787	EIF4G1 DYNC1H1	0.173426348631119,2,228,5.99259868421053,"Positive regulation of cell cycle "," http://amigo.geneontology.org/amigo/term/GO:0045787"," EIF4G1 DYNC1H1"
0.173551680566814	1	31	220372983870968	Downstream signaling events of B Cell Receptor BCR	https://reactome.org/download/current	CUL1	0.173551680566814,1,31,22.0372983870968,"Downstream signaling events of B Cell Receptor BCR","https://reactome.org/download/current"," CUL1"
0.173551680566814	1	31	220372983870968	WP3243 Amyotrophic lateral sclerosis (ALS)	http://www.wikipathways.org/instance/WP3243_r96317	BAX	0.173551680566814,1,31,22.0372983870968,"WP3243 Amyotrophic lateral sclerosis (ALS)","http://www.wikipathways.org/instance/WP3243_r96317"," BAX"
0.173551680566814	1	31	220372983870968	Positive regulation of alpha-beta T cell differentiation	http://amigo.geneontology.org/amigo/term/GO:0046638	BOLA-DRA	0.173551680566814,1,31,22.0372983870968,"Positive regulation of alpha-beta T cell differentiation "," http://amigo.geneontology.org/amigo/term/GO:0046638"," BOLA-DRA"
0.173551680566814	1	31	220372983870968	Regulation of cellular senescence	http://amigo.geneontology.org/amigo/term/GO:2000772	YBX1	0.173551680566814,1,31,22.0372983870968,"Regulation of cellular senescence "," http://amigo.geneontology.org/amigo/term/GO:2000772"," YBX1"
0.173551680566814	5	1349	253208395107487	Vesicle	http://amigo.geneontology.org/amigo/term/GO:0031982	ICA1 WDR48 TLR2 BOLA-DRA YBX1	0.173551680566814,5,1349,2.53208395107487,"Vesicle "," http://amigo.geneontology.org/amigo/term/GO:0031982"," ICA1 WDR48 TLR2 BOLA-DRA YBX1"
0.173551680566814	5	1349	253208395107487	Adenyl nucleotide binding	http://amigo.geneontology.org/amigo/term/GO:0030554	DDX58 MCM3 EIF4G1 DYNC1H1 NAT10	0.173551680566814,5,1349,2.53208395107487,"Adenyl nucleotide binding "," http://amigo.geneontology.org/amigo/term/GO:0030554"," DDX58 MCM3 EIF4G1 DYNC1H1 NAT10"
0.173551680566814	1	31	220372983870968	P00060 Ubiquitin proteasome pathway	ftp://ftp.pantherdb.org/pathway/current_release	UBA6	0.173551680566814,1,31,22.0372983870968,"P00060 Ubiquitin proteasome pathway","ftp://ftp.pantherdb.org/pathway/current_release"," UBA6"
0.17374155180161	1	32	213486328125	Regulation of mRNA stability by proteins that bind AU-rich elements	https://reactome.org/download/current	EIF4G1	0.17374155180161,1,32,21.3486328125,"Regulation of mRNA stability by proteins that bind AU-rich elements","https://reactome.org/download/current"," EIF4G1"
0.17374155180161	1	32	213486328125	RRNA modification	http://amigo.geneontology.org/amigo/term/GO:0000154	NAT10	0.17374155180161,1,32,21.3486328125,"RRNA modification "," http://amigo.geneontology.org/amigo/term/GO:0000154"," NAT10"
0.17374155180161	1	32	213486328125	Antigen processing and presentation of endogenous antigen	http://amigo.geneontology.org/amigo/term/GO:0019883	BOLA-DRA	0.17374155180161,1,32,21.3486328125,"Antigen processing and presentation of endogenous antigen "," http://amigo.geneontology.org/amigo/term/GO:0019883"," BOLA-DRA"
0.17374155180161	1	32	213486328125	Cellular response to heat	http://amigo.geneontology.org/amigo/term/GO:0034605	HSBP1	0.17374155180161,1,32,21.3486328125,"Cellular response to heat "," http://amigo.geneontology.org/amigo/term/GO:0034605"," HSBP1"
0.17374155180161	1	32	213486328125	Vesicle transport along microtubule	http://amigo.geneontology.org/amigo/term/GO:0047496	DYNC1H1	0.17374155180161,1,32,21.3486328125,"Vesicle transport along microtubule "," http://amigo.geneontology.org/amigo/term/GO:0047496"," DYNC1H1"
0.17374155180161	1	32	213486328125	Positive regulation of pattern recognition receptor signaling pathway	http://amigo.geneontology.org/amigo/term/GO:0062208	TLR2	0.17374155180161,1,32,21.3486328125,"Positive regulation of pattern recognition receptor signaling pathway "," http://amigo.geneontology.org/amigo/term/GO:0062208"," TLR2"
0.17374155180161	1	32	213486328125	Positive regulation of cell cycle G1/S phase transition	http://amigo.geneontology.org/amigo/term/GO:1902808	EIF4G1	0.17374155180161,1,32,21.3486328125,"Positive regulation of cell cycle G1/S phase transition "," http://amigo.geneontology.org/amigo/term/GO:1902808"," EIF4G1"
0.17374155180161	1	32	213486328125	Positive regulation of double-strand break repair	http://amigo.geneontology.org/amigo/term/GO:2000781	WDR48	0.17374155180161,1,32,21.3486328125,"Positive regulation of double-strand break repair "," http://amigo.geneontology.org/amigo/term/GO:2000781"," WDR48"
0.17374155180161	2	231	591477272727273	Amide binding	http://amigo.geneontology.org/amigo/term/GO:0033218	TLR2 BOLA-DRA	0.17374155180161,2,231,5.91477272727273,"Amide binding "," http://amigo.geneontology.org/amigo/term/GO:0033218"," TLR2 BOLA-DRA"
0.17374155180161	2	233	586400214592275	Chemical carcinogenesis	http://www.genome.jp/kegg-bin/show_pathway?bta05208	GSTO1	0.17374155180161,2,233,5.86400214592275,"Chemical carcinogenesis","http://www.genome.jp/kegg-bin/show_pathway?bta05208 "," GSTO1 "
0.174743387574286	2	235	581409574468085	Regulation of immune effector process	http://amigo.geneontology.org/amigo/term/GO:0002697	DDX58 BOLA-DRA	0.174743387574286,2,235,5.81409574468085,"Regulation of immune effector process "," http://amigo.geneontology.org/amigo/term/GO:0002697"," DDX58 BOLA-DRA"
0.176079799982093	1	33	207017045454545	Intrinsic Pathway for Apoptosis	https://reactome.org/download/current	BAX	0.176079799982093,1,33,20.7017045454545,"Intrinsic Pathway for Apoptosis","https://reactome.org/download/current"," BAX"
0.176079799982093	1	33	207017045454545	Degradation of beta-catenin by the destruction complex	https://reactome.org/download/current	CUL1	0.176079799982093,1,33,20.7017045454545,"Degradation of beta-catenin by the destruction complex","https://reactome.org/download/current"," CUL1"
0.176079799982093	1	33	207017045454545	Regulation of ATPase activity	http://amigo.geneontology.org/amigo/term/GO:0043462	CHTOP	0.176079799982093,1,33,20.7017045454545,"Regulation of ATPase activity "," http://amigo.geneontology.org/amigo/term/GO:0043462"," CHTOP"
0.176079799982093	1	33	207017045454545	Nuclear replication fork	http://amigo.geneontology.org/amigo/term/GO:0043596	ZMIZ2	0.176079799982093,1,33,20.7017045454545,"Nuclear replication fork "," http://amigo.geneontology.org/amigo/term/GO:0043596"," ZMIZ2"
0.176079799982093	2	238	574080882352941	MRNA binding	http://amigo.geneontology.org/amigo/term/GO:0003729	EIF4G1 YBX1	0.176079799982093,2,238,5.74080882352941,"MRNA binding "," http://amigo.geneontology.org/amigo/term/GO:0003729"," EIF4G1 YBX1"
0.176079799982093	1	33	207017045454545	Regulatory RNA binding	http://amigo.geneontology.org/amigo/term/GO:0061980	YBX1	0.176079799982093,1,33,20.7017045454545,"Regulatory RNA binding "," http://amigo.geneontology.org/amigo/term/GO:0061980"," YBX1"
0.177416952751519	1	34	200928308823529	TP53 Regulates Transcription of Cell Cycle Genes	https://reactome.org/download/current	BAX	0.177416952751519,1,34,20.0928308823529,"TP53 Regulates Transcription of Cell Cycle Genes","https://reactome.org/download/current"," BAX"
0.177416952751519	1	34	200928308823529	T cell mediated cytotoxicity	http://amigo.geneontology.org/amigo/term/GO:0001913	BOLA-DRA	0.177416952751519,1,34,20.0928308823529,"T cell mediated cytotoxicity "," http://amigo.geneontology.org/amigo/term/GO:0001913"," BOLA-DRA"
0.177416952751519	1	34	200928308823529	Positive regulation of histone methylation	http://amigo.geneontology.org/amigo/term/GO:0031062	CHTOP	0.177416952751519,1,34,20.0928308823529,"Positive regulation of histone methylation "," http://amigo.geneontology.org/amigo/term/GO:0031062"," CHTOP"
0.177416952751519	3	561	365324197860963	Regulation of cellular catabolic process	http://amigo.geneontology.org/amigo/term/GO:0031329	EIF4G1 YBX1 RNF180	0.177416952751519,3,561,3.65324197860963,"Regulation of cellular catabolic process "," http://amigo.geneontology.org/amigo/term/GO:0031329"," EIF4G1 YBX1 RNF180"
0.177416952751519	2	242	56459194214876	Defense response to bacterium	http://amigo.geneontology.org/amigo/term/GO:0042742	HP TLR2	0.177416952751519,2,242,5.6459194214876,"Defense response to bacterium "," http://amigo.geneontology.org/amigo/term/GO:0042742"," HP TLR2"
0.177416952751519	1	34	200928308823529	Axonal transport	http://amigo.geneontology.org/amigo/term/GO:0098930	DYNC1H1	0.177416952751519,1,34,20.0928308823529,"Axonal transport "," http://amigo.geneontology.org/amigo/term/GO:0098930"," DYNC1H1"
0.177416952751519	2	242	56459194214876	ATP hydrolysis activity	http://amigo.geneontology.org/amigo/term/GO:0016887	DDX58 MCM3	0.177416952751519,2,242,5.6459194214876,"ATP hydrolysis activity "," http://amigo.geneontology.org/amigo/term/GO:0016887"," DDX58 MCM3"
0.177416952751519	1	34	200928308823529	Ubiquitin-like protein conjugating enzyme binding	http://amigo.geneontology.org/amigo/term/GO:0044390	RNF180	0.177416952751519,1,34,20.0928308823529,"Ubiquitin-like protein conjugating enzyme binding "," http://amigo.geneontology.org/amigo/term/GO:0044390"," RNF180"
0.177416952751519	1	34	200928308823529	Apoptosis	http://www.genome.jp/kegg-bin/show_pathway?bta04215	BAX	0.177416952751519,1,34,20.0928308823529,"Apoptosis","http://www.genome.jp/kegg-bin/show_pathway?bta04215 "," BAX"
0.178287129516095	1	35	1951875	WP3205 Aryl Hydrocarbon Receptor Pathway	http://www.wikipathways.org/instance/WP3205_r89412	BAX	0.178287129516095,1,35,19.51875,"WP3205 Aryl Hydrocarbon Receptor Pathway","http://www.wikipathways.org/instance/WP3205_r89412"," BAX"
0.178287129516095	1	35	1951875	WP983 DNA Replication	http://www.wikipathways.org/instance/WP983_r96303	MCM3	0.178287129516095,1,35,19.51875,"WP983 DNA Replication","http://www.wikipathways.org/instance/WP983_r96303"," MCM3"
0.178287129516095	1	35	1951875	Regulation of myeloid leukocyte mediated immunity	http://amigo.geneontology.org/amigo/term/GO:0002886	DDX58	0.178287129516095,1,35,19.51875,"Regulation of myeloid leukocyte mediated immunity "," http://amigo.geneontology.org/amigo/term/GO:0002886"," DDX58"
0.178287129516095	1	35	1951875	Regulation of peptidyl-threonine phosphorylation	http://amigo.geneontology.org/amigo/term/GO:0010799	EIF4G1	0.178287129516095,1,35,19.51875,"Regulation of peptidyl-threonine phosphorylation "," http://amigo.geneontology.org/amigo/term/GO:0010799"," EIF4G1"
0.178287129516095	1	35	1951875	MRNA stabilization	http://amigo.geneontology.org/amigo/term/GO:0048255	YBX1	0.178287129516095,1,35,19.51875,"MRNA stabilization "," http://amigo.geneontology.org/amigo/term/GO:0048255"," YBX1"
0.178287129516095	1	35	1951875	Regulation of cell aging	http://amigo.geneontology.org/amigo/term/GO:0090342	YBX1	0.178287129516095,1,35,19.51875,"Regulation of cell aging "," http://amigo.geneontology.org/amigo/term/GO:0090342"," YBX1"
0.178287129516095	1	35	1951875	Immunological synapse	http://amigo.geneontology.org/amigo/term/GO:0001772	BOLA-DRA	0.178287129516095,1,35,19.51875,"Immunological synapse "," http://amigo.geneontology.org/amigo/term/GO:0001772"," BOLA-DRA"
0.178287129516095	1	35	1951875	DNA replication	http://www.genome.jp/kegg-bin/show_pathway?bta03030	MCM3	0.178287129516095,1,35,19.51875,"DNA replication","http://www.genome.jp/kegg-bin/show_pathway?bta03030 "," MCM3"
0.178287129516095	1	35	1951875	Bta-mir-2440 target gene	https://www.mirnet.ca	WDR48	0.178287129516095,1,35,19.51875,"Bta-mir-2440 target gene","https://www.mirnet.ca"," WDR48"
0.178326358453411	2	246	555411585365854	Antigen processingUbiquitination & Proteasome degradation	https://reactome.org/download/current	UBA6 CUL1	0.178326358453411,2,246,5.55411585365854,"Antigen processingUbiquitination & Proteasome degradation","https://reactome.org/download/current"," UBA6 CUL1"
0.181514947701579	2	249	548719879518072	Leukocyte mediated immunity	http://amigo.geneontology.org/amigo/term/GO:0002443	DDX58 BOLA-DRA	0.181514947701579,2,249,5.48719879518072,"Leukocyte mediated immunity "," http://amigo.geneontology.org/amigo/term/GO:0002443"," DDX58 BOLA-DRA"
0.181514947701579	1	36	189765625	Antigen processing and presentation of peptide antigen	http://amigo.geneontology.org/amigo/term/GO:0048002	BOLA-DRA	0.181514947701579,1,36,18.9765625,"Antigen processing and presentation of peptide antigen "," http://amigo.geneontology.org/amigo/term/GO:0048002"," BOLA-DRA"
0.181514947701579	1	36	189765625	Thyroid cancer	http://www.genome.jp/kegg-bin/show_pathway?bta05216	BAX	0.181514947701579,1,36,18.9765625,"Thyroid cancer","http://www.genome.jp/kegg-bin/show_pathway?bta05216 "," BAX"
0.184242735375867	6	1883	217681226765799	Catabolic process	http://amigo.geneontology.org/amigo/term/GO:0009056	UBA6 CUL1 EIF4G1 HNMT YBX1 RNF180	0.184242735375867,6,1883,2.17681226765799,"Catabolic process "," http://amigo.geneontology.org/amigo/term/GO:0009056"," UBA6 CUL1 EIF4G1 HNMT YBX1 RNF180"
0.184242735375867	1	37	184636824324324	Negative regulation of muscle cell differentiation	http://amigo.geneontology.org/amigo/term/GO:0051148	YBX1	0.184242735375867,1,37,18.4636824324324,"Negative regulation of muscle cell differentiation "," http://amigo.geneontology.org/amigo/term/GO:0051148"," YBX1"
0.184242735375867	4	976	279982069672131	Positive regulation of multicellular organismal process	http://amigo.geneontology.org/amigo/term/GO:0051240	DDX58 TLR2 BOLA-DRA DYNC1H1	0.184242735375867,4,976,2.79982069672131,"Positive regulation of multicellular organismal process "," http://amigo.geneontology.org/amigo/term/GO:0051240"," DDX58 TLR2 BOLA-DRA DYNC1H1"
0.184242735375867	1	37	184636824324324	Regulation of gene silencing by miRNA	http://amigo.geneontology.org/amigo/term/GO:0060964	EIF4G1	0.184242735375867,1,37,18.4636824324324,"Regulation of gene silencing by miRNA "," http://amigo.geneontology.org/amigo/term/GO:0060964"," EIF4G1"
0.184242735375867	1	37	184636824324324	Ligase activity, forming carbon-sulfur bonds	http://amigo.geneontology.org/amigo/term/GO:0016877	UBA6	0.184242735375867,1,37,18.4636824324324,"Ligase activity, forming carbon-sulfur bonds "," http://amigo.geneontology.org/amigo/term/GO:0016877"," UBA6"
0.184379119658153	2	254	537918307086614	Response to virus	http://amigo.geneontology.org/amigo/term/GO:0009615	DDX58 TLR2	0.184379119658153,2,254,5.37918307086614,"Response to virus "," http://amigo.geneontology.org/amigo/term/GO:0009615"," DDX58 TLR2"
0.184379119658153	2	254	537918307086614	Positive regulation of proteolysis	http://amigo.geneontology.org/amigo/term/GO:0045862	WDR48 RNF180	0.184379119658153,2,254,5.37918307086614,"Positive regulation of proteolysis "," http://amigo.geneontology.org/amigo/term/GO:0045862"," WDR48 RNF180"
0.185238474300219	2	255	535808823529412	Regulation of binding	http://amigo.geneontology.org/amigo/term/GO:0051098	EIF4G1 NES	0.185238474300219,2,255,5.35808823529412,"Regulation of binding "," http://amigo.geneontology.org/amigo/term/GO:0051098"," EIF4G1 NES"
0.18603927284803	1	38	179777960526316	Positive regulation of cytokine production involved in immune response	http://amigo.geneontology.org/amigo/term/GO:0002720	DDX58	0.18603927284803,1,38,17.9777960526316,"Positive regulation of cytokine production involved in immune response "," http://amigo.geneontology.org/amigo/term/GO:0002720"," DDX58"
0.18603927284803	1	38	179777960526316	Establishment of spindle localization	http://amigo.geneontology.org/amigo/term/GO:0051293	DYNC1H1	0.18603927284803,1,38,17.9777960526316,"Establishment of spindle localization "," http://amigo.geneontology.org/amigo/term/GO:0051293"," DYNC1H1"
0.18603927284803	1	38	179777960526316	Presynapse assembly	http://amigo.geneontology.org/amigo/term/GO:0099054	EIF4G1	0.18603927284803,1,38,17.9777960526316,"Presynapse assembly "," http://amigo.geneontology.org/amigo/term/GO:0099054"," EIF4G1"
0.18603927284803	1	38	179777960526316	Disulfide oxidoreductase activity	http://amigo.geneontology.org/amigo/term/GO:0015036	GSTO1	0.18603927284803,1,38,17.9777960526316,"Disulfide oxidoreductase activity "," http://amigo.geneontology.org/amigo/term/GO:0015036"," GSTO1"
0.187347287801719	1	39	175168269230769	Interleukin-17 signaling	https://reactome.org/download/current	CUL1	0.187347287801719,1,39,17.5168269230769,"Interleukin-17 signaling","https://reactome.org/download/current"," CUL1"
0.187347287801719	1	39	175168269230769	MAP kinase activation	https://reactome.org/download/current	CUL1	0.187347287801719,1,39,17.5168269230769,"MAP kinase activation","https://reactome.org/download/current"," CUL1"
0.187347287801719	1	39	175168269230769	WP3244 Integrated Cancer pathway	http://www.wikipathways.org/instance/WP3244_r80873	BAX	0.187347287801719,1,39,17.5168269230769,"WP3244 Integrated Cancer pathway","http://www.wikipathways.org/instance/WP3244_r80873"," BAX"
0.187347287801719	1	39	175168269230769	Interferon-beta production	http://amigo.geneontology.org/amigo/term/GO:0032608	DDX58	0.187347287801719,1,39,17.5168269230769,"Interferon-beta production "," http://amigo.geneontology.org/amigo/term/GO:0032608"," DDX58"
0.187347287801719	1	39	175168269230769	Regulation of interferon-beta production	http://amigo.geneontology.org/amigo/term/GO:0032648	DDX58	0.187347287801719,1,39,17.5168269230769,"Regulation of interferon-beta production "," http://amigo.geneontology.org/amigo/term/GO:0032648"," DDX58"
0.187347287801719	1	39	175168269230769	Bta-mir-188 target gene	https://www.mirnet.ca	CHTOP	0.187347287801719,1,39,17.5168269230769,"Bta-mir-188 target gene","https://www.mirnet.ca"," CHTOP"
0.187347287801719	1	39	175168269230769	Neuron projection cytoplasm	http://amigo.geneontology.org/amigo/term/GO:0120111	DYNC1H1	0.187347287801719,1,39,17.5168269230769,"Neuron projection cytoplasm "," http://amigo.geneontology.org/amigo/term/GO:0120111"," DYNC1H1"
0.187347287801719	1	39	175168269230769	Nuclear receptor coactivator activity	http://amigo.geneontology.org/amigo/term/GO:0030374	ZMIZ2	0.187347287801719,1,39,17.5168269230769,"Nuclear receptor coactivator activity "," http://amigo.geneontology.org/amigo/term/GO:0030374"," ZMIZ2"
0.187546586139056	3	596	343870595637584	Regulation of immune response	http://amigo.geneontology.org/amigo/term/GO:0050776	TLR2 BOLA-DRA CD48	0.187546586139056,3,596,3.43870595637584,"Regulation of immune response "," http://amigo.geneontology.org/amigo/term/GO:0050776"," TLR2 BOLA-DRA CD48"
0.188218503957684	2	262	521493320610687	Regulation of translation	http://amigo.geneontology.org/amigo/term/GO:0006417	EIF4G1 NAT10	0.188218503957684,2,262,5.21493320610687,"Regulation of translation "," http://amigo.geneontology.org/amigo/term/GO:0006417"," EIF4G1 NAT10"
0.189022321656364	1	40	1707890625	MTOR signalling	https://reactome.org/download/current	EIF4G1	0.189022321656364,1,40,17.07890625,"MTOR signalling","https://reactome.org/download/current"," EIF4G1"
0.189022321656364	1	40	1707890625	Peptide hormone metabolism	https://reactome.org/download/current	SEC11C	0.189022321656364,1,40,17.07890625,"Peptide hormone metabolism","https://reactome.org/download/current"," SEC11C"
0.189022321656364	1	40	1707890625	Regulation of double-strand break repair via homologous recombination	http://amigo.geneontology.org/amigo/term/GO:0010569	WDR48	0.189022321656364,1,40,17.07890625,"Regulation of double-strand break repair via homologous recombination "," http://amigo.geneontology.org/amigo/term/GO:0010569"," WDR48"
0.189022321656364	1	40	1707890625	Positive regulation of alpha-beta T cell activation	http://amigo.geneontology.org/amigo/term/GO:0046635	BOLA-DRA	0.189022321656364,1,40,17.07890625,"Positive regulation of alpha-beta T cell activation "," http://amigo.geneontology.org/amigo/term/GO:0046635"," BOLA-DRA"
0.189022321656364	1	40	1707890625	Regulation of posttranscriptional gene silencing	http://amigo.geneontology.org/amigo/term/GO:0060147	EIF4G1	0.189022321656364,1,40,17.07890625,"Regulation of posttranscriptional gene silencing "," http://amigo.geneontology.org/amigo/term/GO:0060147"," EIF4G1"
0.191017091476385	4	1006	271632703777336	Regulation of immune system process	http://amigo.geneontology.org/amigo/term/GO:0002682	DDX58 TLR2 BOLA-DRA CD48	0.191017091476385,4,1006,2.71632703777336,"Regulation of immune system process "," http://amigo.geneontology.org/amigo/term/GO:0002682"," DDX58 TLR2 BOLA-DRA CD48"
0.191479321801733	1	41	166623475609756	Regulation of gene silencing by RNA	http://amigo.geneontology.org/amigo/term/GO:0060966	EIF4G1	0.191479321801733,1,41,16.6623475609756,"Regulation of gene silencing by RNA "," http://amigo.geneontology.org/amigo/term/GO:0060966"," EIF4G1"
0.191479321801733	1	41	166623475609756	Presynapse organization	http://amigo.geneontology.org/amigo/term/GO:0099172	EIF4G1	0.191479321801733,1,41,16.6623475609756,"Presynapse organization "," http://amigo.geneontology.org/amigo/term/GO:0099172"," EIF4G1"
0.191479321801733	1	41	166623475609756	Cytochrome-c oxidase activity	http://amigo.geneontology.org/amigo/term/GO:0004129		0.191479321801733,1,41,16.6623475609756,"Cytochrome-c oxidase activity "," http://amigo.geneontology.org/amigo/term/GO:0004129"," "
0.191479321801733	1	41	166623475609756	Oxidoreductase activity, acting on a heme group of donors	http://amigo.geneontology.org/amigo/term/GO:0016675		0.191479321801733,1,41,16.6623475609756,"Oxidoreductase activity, acting on a heme group of donors "," http://amigo.geneontology.org/amigo/term/GO:0016675"," "
0.192075976666903	1	43	158873546511628	WP965 Translation Factors	http://www.wikipathways.org/instance/WP965_r80725	EIF4G1	0.192075976666903,1,43,15.8873546511628,"WP965 Translation Factors","http://www.wikipathways.org/instance/WP965_r80725"," EIF4G1"
0.192075976666903	1	43	158873546511628	Positive regulation of leukocyte mediated cytotoxicity	http://amigo.geneontology.org/amigo/term/GO:0001912	BOLA-DRA	0.192075976666903,1,43,15.8873546511628,"Positive regulation of leukocyte mediated cytotoxicity "," http://amigo.geneontology.org/amigo/term/GO:0001912"," BOLA-DRA"
0.192075976666903	1	42	16265625	Regulation of centrosome duplication	http://amigo.geneontology.org/amigo/term/GO:0010824	NAT10	0.192075976666903,1,42,16.265625,"Regulation of centrosome duplication "," http://amigo.geneontology.org/amigo/term/GO:0010824"," NAT10"
0.192075976666903	1	42	16265625	Regulation of telomere maintenance via telomerase	http://amigo.geneontology.org/amigo/term/GO:0032210	NAT10	0.192075976666903,1,42,16.265625,"Regulation of telomere maintenance via telomerase "," http://amigo.geneontology.org/amigo/term/GO:0032210"," NAT10"
0.192075976666903	1	43	158873546511628	Intermediate filament-based process	http://amigo.geneontology.org/amigo/term/GO:0045103	NES	0.192075976666903,1,43,15.8873546511628,"Intermediate filament-based process "," http://amigo.geneontology.org/amigo/term/GO:0045103"," NES"
0.192075976666903	1	42	16265625	Intermediate filament cytoskeleton organization	http://amigo.geneontology.org/amigo/term/GO:0045104	NES	0.192075976666903,1,42,16.265625,"Intermediate filament cytoskeleton organization "," http://amigo.geneontology.org/amigo/term/GO:0045104"," NES"
0.192075976666903	1	42	16265625	Positive regulation of DNA recombination	http://amigo.geneontology.org/amigo/term/GO:0045911	WDR48	0.192075976666903,1,42,16.265625,"Positive regulation of DNA recombination "," http://amigo.geneontology.org/amigo/term/GO:0045911"," WDR48"
0.192075976666903	1	43	158873546511628	Regulation of alpha-beta T cell differentiation	http://amigo.geneontology.org/amigo/term/GO:0046637	BOLA-DRA	0.192075976666903,1,43,15.8873546511628,"Regulation of alpha-beta T cell differentiation "," http://amigo.geneontology.org/amigo/term/GO:0046637"," BOLA-DRA"
0.192075976666903	3	614	333789698697068	Proteolysis involved in cellular protein catabolic process	http://amigo.geneontology.org/amigo/term/GO:0051603	UBA6 CUL1 RNF180	0.192075976666903,3,614,3.33789698697068,"Proteolysis involved in cellular protein catabolic process "," http://amigo.geneontology.org/amigo/term/GO:0051603"," UBA6 CUL1 RNF180"
0.192075976666903	1	42	16265625	Spindle localization	http://amigo.geneontology.org/amigo/term/GO:0051653	DYNC1H1	0.192075976666903,1,42,16.265625,"Spindle localization "," http://amigo.geneontology.org/amigo/term/GO:0051653"," DYNC1H1"
0.192075976666903	4	1017	268694690265487	Organonitrogen compound catabolic process	http://amigo.geneontology.org/amigo/term/GO:1901565	UBA6 CUL1 HNMT RNF180	0.192075976666903,4,1017,2.68694690265487,"Organonitrogen compound catabolic process "," http://amigo.geneontology.org/amigo/term/GO:1901565"," UBA6 CUL1 HNMT RNF180"
0.192075976666903	1	43	158873546511628	Negative regulation of mRNA catabolic process	http://amigo.geneontology.org/amigo/term/GO:1902373	YBX1	0.192075976666903,1,43,15.8873546511628,"Negative regulation of mRNA catabolic process "," http://amigo.geneontology.org/amigo/term/GO:1902373"," YBX1"
0.192075976666903	1	42	16265625	Regulation of CD4-positive, alpha-beta T cell activation	http://amigo.geneontology.org/amigo/term/GO:2000514	BOLA-DRA	0.192075976666903,1,42,16.265625,"Regulation of CD4-positive, alpha-beta T cell activation "," http://amigo.geneontology.org/amigo/term/GO:2000514"," BOLA-DRA"
0.192075976666903	6	1949	210309774243202	Nucleotide binding	http://amigo.geneontology.org/amigo/term/GO:0000166	DDX58 CHTOP MCM3 EIF4G1 DYNC1H1 NAT10	0.192075976666903,6,1949,2.10309774243202,"Nucleotide binding "," http://amigo.geneontology.org/amigo/term/GO:0000166"," DDX58 CHTOP MCM3 EIF4G1 DYNC1H1 NAT10"
0.192075976666903	1	42	16265625	Amyloid-beta binding	http://amigo.geneontology.org/amigo/term/GO:0001540	TLR2	0.192075976666903,1,42,16.265625,"Amyloid-beta binding "," http://amigo.geneontology.org/amigo/term/GO:0001540"," TLR2"
0.192075976666903	2	270	506041666666667	Ubiquitin protein ligase activity	http://amigo.geneontology.org/amigo/term/GO:0061630	KCMF1 RNF180	0.192075976666903,2,270,5.06041666666667,"Ubiquitin protein ligase activity "," http://amigo.geneontology.org/amigo/term/GO:0061630"," KCMF1 RNF180"
0.192075976666903	6	1949	210309774243202	Nucleoside phosphate binding	http://amigo.geneontology.org/amigo/term/GO:1901265	DDX58 CHTOP MCM3 EIF4G1 DYNC1H1 NAT10	0.192075976666903,6,1949,2.10309774243202,"Nucleoside phosphate binding "," http://amigo.geneontology.org/amigo/term/GO:1901265"," DDX58 CHTOP MCM3 EIF4G1 DYNC1H1 NAT10"
0.192075976666903	2	275	496840909090909	Parkinson disease	http://www.genome.jp/kegg-bin/show_pathway?bta05012	BAX	0.192075976666903,2,275,4.96840909090909,"Parkinson disease","http://www.genome.jp/kegg-bin/show_pathway?bta05012 "," BAX "
0.192075976666903	2	274	498654197080292	Prion disease	http://www.genome.jp/kegg-bin/show_pathway?bta05020	BAX	0.192075976666903,2,274,4.98654197080292,"Prion disease","http://www.genome.jp/kegg-bin/show_pathway?bta05020 "," BAX "
0.192075976666903	1	43	158873546511628	P00059 p53 pathway	ftp://ftp.pantherdb.org/pathway/current_release	BAX	0.192075976666903,1,43,15.8873546511628,"P00059 p53 pathway","ftp://ftp.pantherdb.org/pathway/current_release"," BAX"
0.192744994105508	1	44	155262784090909	Axo-dendritic transport	http://amigo.geneontology.org/amigo/term/GO:0008088	DYNC1H1	0.192744994105508,1,44,15.5262784090909,"Axo-dendritic transport "," http://amigo.geneontology.org/amigo/term/GO:0008088"," DYNC1H1"
0.192744994105508	1	44	155262784090909	Positive regulation of interleukin-8 production	http://amigo.geneontology.org/amigo/term/GO:0032757	TLR2	0.192744994105508,1,44,15.5262784090909,"Positive regulation of interleukin-8 production "," http://amigo.geneontology.org/amigo/term/GO:0032757"," TLR2"
0.192744994105508	1	44	155262784090909	T-helper cell differentiation	http://amigo.geneontology.org/amigo/term/GO:0042093	BOLA-DRA	0.192744994105508,1,44,15.5262784090909,"T-helper cell differentiation "," http://amigo.geneontology.org/amigo/term/GO:0042093"," BOLA-DRA"
0.192744994105508	1	44	155262784090909	Regulation of centrosome cycle	http://amigo.geneontology.org/amigo/term/GO:0046605	NAT10	0.192744994105508,1,44,15.5262784090909,"Regulation of centrosome cycle "," http://amigo.geneontology.org/amigo/term/GO:0046605"," NAT10"
0.192744994105508	2	277	493253610108303	Regulation of DNA metabolic process	http://amigo.geneontology.org/amigo/term/GO:0051052	WDR48 NAT10	0.192744994105508,2,277,4.93253610108303,"Regulation of DNA metabolic process "," http://amigo.geneontology.org/amigo/term/GO:0051052"," WDR48 NAT10"
0.192744994105508	1	44	155262784090909	Positive regulation of response to cytokine stimulus	http://amigo.geneontology.org/amigo/term/GO:0060760	TLR2	0.192744994105508,1,44,15.5262784090909,"Positive regulation of response to cytokine stimulus "," http://amigo.geneontology.org/amigo/term/GO:0060760"," TLR2"
0.192744994105508	2	278	491479316546763	Ubiquitin-like protein ligase activity	http://amigo.geneontology.org/amigo/term/GO:0061659	KCMF1 RNF180	0.192744994105508,2,278,4.91479316546763,"Ubiquitin-like protein ligase activity "," http://amigo.geneontology.org/amigo/term/GO:0061659"," KCMF1 RNF180"
0.192744994105508	6	1962	20891628440367	Carbohydrate derivative binding	http://amigo.geneontology.org/amigo/term/GO:0097367	DDX58 TLR2 MCM3 EIF4G1 DYNC1H1 NAT10	0.192744994105508,6,1962,2.0891628440367,"Carbohydrate derivative binding "," http://amigo.geneontology.org/amigo/term/GO:0097367"," DDX58 TLR2 MCM3 EIF4G1 DYNC1H1 NAT10"
0.192744994105508	1	44	155262784090909	Bta-mir-1281 target gene	https://www.mirnet.ca	BAX	0.192744994105508,1,44,15.5262784090909,"Bta-mir-1281 target gene","https://www.mirnet.ca"," BAX"
0.192887110128697	2	279	489717741935484	Mitotic cell cycle phase transition	http://amigo.geneontology.org/amigo/term/GO:0044772	EIF4G1 NES	0.192887110128697,2,279,4.89717741935484,"Mitotic cell cycle phase transition "," http://amigo.geneontology.org/amigo/term/GO:0044772"," EIF4G1 NES"
0.193412450621318	4	1036	263766891891892	Membrane protein complex	http://amigo.geneontology.org/amigo/term/GO:0098796	TLR2 BOLA-DRA SEC11C	0.193412450621318,4,1036,2.63766891891892,"Membrane protein complex "," http://amigo.geneontology.org/amigo/term/GO:0098796"," TLR2 BOLA-DRA SEC11C "
0.193566023106177	4	1037	263512536162006	Macromolecule catabolic process	http://amigo.geneontology.org/amigo/term/GO:0009057	UBA6 CUL1 YBX1 RNF180	0.193566023106177,4,1037,2.63512536162006,"Macromolecule catabolic process "," http://amigo.geneontology.org/amigo/term/GO:0009057"," UBA6 CUL1 YBX1 RNF180"
0.193777466221501	1	45	1518125	CLEC7A Dectin-1 signaling	https://reactome.org/download/current	CUL1	0.193777466221501,1,45,15.18125,"CLEC7A Dectin-1 signaling","https://reactome.org/download/current"," CUL1"
0.193777466221501	1	45	1518125	CD4-positive, alpha-beta T cell differentiation involved in immune response	http://amigo.geneontology.org/amigo/term/GO:0002294	BOLA-DRA	0.193777466221501,1,45,15.18125,"CD4-positive, alpha-beta T cell differentiation involved in immune response "," http://amigo.geneontology.org/amigo/term/GO:0002294"," BOLA-DRA"
0.193777466221501	1	45	1518125	RNA stabilization	http://amigo.geneontology.org/amigo/term/GO:0043489	YBX1	0.193777466221501,1,45,15.18125,"RNA stabilization "," http://amigo.geneontology.org/amigo/term/GO:0043489"," YBX1"
0.193777466221501	1	45	1518125	Vasopressin-regulated water reabsorption	http://www.genome.jp/kegg-bin/show_pathway?bta04962	DYNC1H1	0.193777466221501,1,45,15.18125,"Vasopressin-regulated water reabsorption","http://www.genome.jp/kegg-bin/show_pathway?bta04962 "," DYNC1H1"
0.193777466221501	1	45	1518125	P00053 T cell activation	ftp://ftp.pantherdb.org/pathway/current_release	BOLA-DRA	0.193777466221501,1,45,15.18125,"P00053 T cell activation","ftp://ftp.pantherdb.org/pathway/current_release"," BOLA-DRA"
0.194543916346334	2	283	48279593639576	Methylation	http://amigo.geneontology.org/amigo/term/GO:0032259	CHTOP HNMT	0.194543916346334,2,283,4.8279593639576,"Methylation "," http://amigo.geneontology.org/amigo/term/GO:0032259"," CHTOP HNMT"
0.194770998466224	1	46	14851222826087	Interleukin-1 signaling	https://reactome.org/download/current	CUL1	0.194770998466224,1,46,14.851222826087,"Interleukin-1 signaling","https://reactome.org/download/current"," CUL1"
0.194770998466224	1	46	14851222826087	Alpha-beta T cell activation involved in immune response	http://amigo.geneontology.org/amigo/term/GO:0002287	BOLA-DRA	0.194770998466224,1,46,14.851222826087,"Alpha-beta T cell activation involved in immune response "," http://amigo.geneontology.org/amigo/term/GO:0002287"," BOLA-DRA"
0.194770998466224	1	46	14851222826087	Alpha-beta T cell differentiation involved in immune response	http://amigo.geneontology.org/amigo/term/GO:0002293	BOLA-DRA	0.194770998466224,1,46,14.851222826087,"Alpha-beta T cell differentiation involved in immune response "," http://amigo.geneontology.org/amigo/term/GO:0002293"," BOLA-DRA"
0.194770998466224	1	46	14851222826087	Transcription elongation from RNA polymerase II promoter	http://amigo.geneontology.org/amigo/term/GO:0006368	ZMIZ2	0.194770998466224,1,46,14.851222826087,"Transcription elongation from RNA polymerase II promoter "," http://amigo.geneontology.org/amigo/term/GO:0006368"," ZMIZ2"
0.194770998466224	1	46	14851222826087	Positive regulation of type I interferon production	http://amigo.geneontology.org/amigo/term/GO:0032481	DDX58	0.194770998466224,1,46,14.851222826087,"Positive regulation of type I interferon production "," http://amigo.geneontology.org/amigo/term/GO:0032481"," DDX58"
0.194770998466224	1	46	14851222826087	Multicellular organismal response to stress	http://amigo.geneontology.org/amigo/term/GO:0033555	EIF4G1	0.194770998466224,1,46,14.851222826087,"Multicellular organismal response to stress "," http://amigo.geneontology.org/amigo/term/GO:0033555"," EIF4G1"
0.194770998466224	1	46	14851222826087	Polysome	http://amigo.geneontology.org/amigo/term/GO:0005844	EIF4G1	0.194770998466224,1,46,14.851222826087,"Polysome "," http://amigo.geneontology.org/amigo/term/GO:0005844"," EIF4G1"
0.194995331406559	2	286	477731643356643	Class I MHC mediated antigen processing & presentation	https://reactome.org/download/current	UBA6 CUL1	0.194995331406559,2,286,4.77731643356643,"Class I MHC mediated antigen processing & presentation","https://reactome.org/download/current"," UBA6 CUL1"
0.195342151804029	1	47	145352393617021	Iron uptake and transport	https://reactome.org/download/current	CUL1	0.195342151804029,1,47,14.5352393617021,"Iron uptake and transport","https://reactome.org/download/current"," CUL1"
0.195342151804029	1	47	145352393617021	G1/S Transition	https://reactome.org/download/current	CUL1	0.195342151804029,1,47,14.5352393617021,"G1/S Transition","https://reactome.org/download/current"," CUL1"
0.195342151804029	1	47	145352393617021	Signaling by the B Cell Receptor BCR	https://reactome.org/download/current	CUL1	0.195342151804029,1,47,14.5352393617021,"Signaling by the B Cell Receptor BCR","https://reactome.org/download/current"," CUL1"
0.195342151804029	1	47	145352393617021	WP3126 Apoptosis-related network due to altered Notch3 in ovarian cancer	http://www.wikipathways.org/instance/WP3126_r80679	CUL1	0.195342151804029,1,47,14.5352393617021,"WP3126 Apoptosis-related network due to altered Notch3 in ovarian cancer","http://www.wikipathways.org/instance/WP3126_r80679"," CUL1"
0.195342151804029	1	47	145352393617021	Positive regulation of T cell mediated immunity	http://amigo.geneontology.org/amigo/term/GO:0002711	BOLA-DRA	0.195342151804029,1,47,14.5352393617021,"Positive regulation of T cell mediated immunity "," http://amigo.geneontology.org/amigo/term/GO:0002711"," BOLA-DRA"
0.195342151804029	1	47	145352393617021	SCF-dependent proteasomal ubiquitin-dependent protein catabolic process	http://amigo.geneontology.org/amigo/term/GO:0031146	CUL1	0.195342151804029,1,47,14.5352393617021,"SCF-dependent proteasomal ubiquitin-dependent protein catabolic process "," http://amigo.geneontology.org/amigo/term/GO:0031146"," CUL1"
0.195342151804029	1	47	145352393617021	Regulation of telomere maintenance via telomere lengthening	http://amigo.geneontology.org/amigo/term/GO:1904356	NAT10	0.195342151804029,1,47,14.5352393617021,"Regulation of telomere maintenance via telomere lengthening "," http://amigo.geneontology.org/amigo/term/GO:1904356"," NAT10"
0.195342151804029	3	638	321233346394984	Microtubule organizing center	http://amigo.geneontology.org/amigo/term/GO:0005815	MCM3 HNMT DYNC1H1	0.195342151804029,3,638,3.21233346394984,"Microtubule organizing center "," http://amigo.geneontology.org/amigo/term/GO:0005815"," MCM3 HNMT DYNC1H1"
0.195865363540058	2	290	47114224137931	Ribosome biogenesis	http://amigo.geneontology.org/amigo/term/GO:0042254	RPL35A NAT10	0.195865363540058,2,290,4.7114224137931,"Ribosome biogenesis "," http://amigo.geneontology.org/amigo/term/GO:0042254"," RPL35A NAT10"
0.195865363540058	2	290	47114224137931	Bta-mir-2894 target gene	https://www.mirnet.ca	TULP4 DYNC1H1	0.195865363540058,2,290,4.7114224137931,"Bta-mir-2894 target gene","https://www.mirnet.ca"," TULP4 DYNC1H1"
0.197415194071449	1	48	14232421875	Regulation of translational initiation	http://amigo.geneontology.org/amigo/term/GO:0006446	EIF4G1	0.197415194071449,1,48,14.232421875,"Regulation of translational initiation "," http://amigo.geneontology.org/amigo/term/GO:0006446"," EIF4G1"
0.197415194071449	1	48	14232421875	Maturation of SSU-rRNA	http://amigo.geneontology.org/amigo/term/GO:0030490	NAT10	0.197415194071449,1,48,14.232421875,"Maturation of SSU-rRNA "," http://amigo.geneontology.org/amigo/term/GO:0030490"," NAT10"
0.197415194071449	3	647	316764876352396	Cellular protein catabolic process	http://amigo.geneontology.org/amigo/term/GO:0044257	UBA6 CUL1 RNF180	0.197415194071449,3,647,3.16764876352396,"Cellular protein catabolic process "," http://amigo.geneontology.org/amigo/term/GO:0044257"," UBA6 CUL1 RNF180"
