# Supplementary material for: Mycobacterium avium subsp. paratuberculosis Infected Cows Reveal Divergent Immune Response in Bovine Peripheral Blood Derived Lymphocyte Proteome
Source: Metabolites. 2022 Sep 29;12(10):924. doi: 10.3390/metabo12100924 (PMC9608910; doi:10.3390/metabo12100924)
Supplement: Supplementary file 1 [file metabolites-12-00924-s001.zip › Supplementary Table S2_Korbonits et al.xlsx]

## Sheet: Supplementary Table 2_Korbonits
Enrichment FDR	nGenes	Pathway Genes	Fold Enrichment	Pathway	URL	Genes	Enrichment FDR,"nGenes","Pathway Genes","Fold Enrichment","Pathway","URL","Genes"
0.00000385	12	220	156897129186603	Platelet activation signaling and aggregation	https://reactome.org/download/current	YWHAZ LGALS3BP ITGA2B PLEK MMRN1 ALDOA CD9 ARRB1 TLN1 TUBA4A MANF F2RL3	3.85255430530887e-08,12,220,15.6897129186603,"Platelet activation signaling and aggregation","https://reactome.org/download/current"," YWHAZ LGALS3BP ITGA2B PLEK MMRN1 ALDOA CD9 ARRB1 TLN1 TUBA4A MANF F2RL3"
0.00000397	15	443	973966377569205	Hemostasis	https://reactome.org/download/current	YWHAZ LGALS3BP GRB2 ITGA2B PLEK MMRN1 ALDOA PRKAR2A CD9 ARRB1 SERPINB2 TLN1 TUBA4A MANF F2RL3	3.96632282830242e-08,15,443,9.73966377569205,"Hemostasis","https://reactome.org/download/current"," YWHAZ LGALS3BP GRB2 ITGA2B PLEK MMRN1 ALDOA PRKAR2A CD9 ARRB1 SERPINB2 TLN1 TUBA4A MANF F2RL3"
0.000000104	9	106	244226663356504	Platelet degranulation	https://reactome.org/download/current	LGALS3BP ITGA2B PLEK MMRN1 ALDOA CD9 TLN1 TUBA4A MANF	1.04120475792767e-07,9,106,24.4226663356504,"Platelet degranulation","https://reactome.org/download/current"," LGALS3BP ITGA2B PLEK MMRN1 ALDOA CD9 TLN1 TUBA4A MANF"
0.000000109	9	110	235345693779904	Response to elevated platelet cytosolic Ca2+	https://reactome.org/download/current	LGALS3BP ITGA2B PLEK MMRN1 ALDOA CD9 TLN1 TUBA4A MANF	1.09203118283066e-07,9,110,23.5345693779904,"Response to elevated platelet cytosolic Ca2+","https://reactome.org/download/current"," LGALS3BP ITGA2B PLEK MMRN1 ALDOA CD9 TLN1 TUBA4A MANF"
0.00192975704267383	13	801	46683914843288	Cytoskeletal protein binding	http://amigo.geneontology.org/amigo/term/GO:0008092	CACYBP WIPF1 ACTC1 MAPRE2 PDCD5 PDLIM1 MYL9 ALDOA KCNMA1 COTL1 OPA1 GSN TLN1	0.00192975704267383,13,801,4.6683914843288,"Cytoskeletal protein binding "," http://amigo.geneontology.org/amigo/term/GO:0008092"," CACYBP WIPF1 ACTC1 MAPRE2 PDCD5 PDLIM1 MYL9 ALDOA KCNMA1 COTL1 OPA1 GSN TLN1"
0.00756809461360652	6	159	108545183714002	WP3197 Focal Adhesion	http://www.wikipathways.org/instance/WP3197_r80784	GRB2 ITGA2B MYL6 VWF PPP1R12A TLN1	0.00756809461360652,6,159,10.8545183714002,"WP3197 Focal Adhesion","http://www.wikipathways.org/instance/WP3197_r80784"," GRB2 ITGA2B MYL6 VWF PPP1R12A TLN1"
0.00756809461360652	4	45	255684210526316	Chaperone-mediated protein folding	http://amigo.geneontology.org/amigo/term/GO:0061077	PDCD5 FKBP2 PPIB CCT2	0.00756809461360652,4,45,25.5684210526316,"Chaperone-mediated protein folding "," http://amigo.geneontology.org/amigo/term/GO:0061077"," PDCD5 FKBP2 PPIB CCT2"
0.0108121037069746	7	286	704025579683474	RHO GTPase Effectors	https://reactome.org/download/current	YWHAZ WIPF1 GRB2 SEH1L MYL6 MYL9 TUBA4A	0.0108121037069746,7,286,7.04025579683474,"RHO GTPase Effectors","https://reactome.org/download/current"," YWHAZ WIPF1 GRB2 SEH1L MYL6 MYL9 TUBA4A"
0.0108121037069746	3	22	392242822966507	Smooth Muscle Contraction	https://reactome.org/download/current	MYL6 MYL9 TLN1	0.0108121037069746,3,22,39.2242822966507,"Smooth Muscle Contraction","https://reactome.org/download/current"," MYL6 MYL9 TLN1"
0.0108121037069746	5	120	119851973684211	Blood coagulation	http://amigo.geneontology.org/amigo/term/GO:0007596	PLEK MMRN1 VWF CD9 F2RL3	0.0108121037069746,5,120,11.9851973684211,"Blood coagulation "," http://amigo.geneontology.org/amigo/term/GO:0007596"," PLEK MMRN1 VWF CD9 F2RL3"
0.0108121037069746	5	122	117887187230371	Hemostasis	http://amigo.geneontology.org/amigo/term/GO:0007599	PLEK MMRN1 VWF CD9 F2RL3	0.0108121037069746,5,122,11.7887187230371,"Hemostasis "," http://amigo.geneontology.org/amigo/term/GO:0007599"," PLEK MMRN1 VWF CD9 F2RL3"
0.0108121037069746	8	391	588531430878988	Positive regulation of organelle organization	http://amigo.geneontology.org/amigo/term/GO:0010638	MCU GRB2 CCT6A PDCD5 PLEK RAB3GAP1 CCT2 GSN	0.0108121037069746,8,391,5.88531430878988,"Positive regulation of organelle organization "," http://amigo.geneontology.org/amigo/term/GO:0010638"," MCU GRB2 CCT6A PDCD5 PLEK RAB3GAP1 CCT2 GSN"
0.0108121037069746	4	59	195013380909902	Extracellular exosome	http://amigo.geneontology.org/amigo/term/GO:0070062	ITGA2B ALDOA CLIC1 CD9	0.0108121037069746,4,59,19.5013380909902,"Extracellular exosome "," http://amigo.geneontology.org/amigo/term/GO:0070062"," ITGA2B ALDOA CLIC1 CD9"
0.0108121037069746	16	1514	303983869846346	Enzyme binding	http://amigo.geneontology.org/amigo/term/GO:0019899	CACYBP GRB2 MAPRE2 PLEK PPP3R1 VWF ENO1 RAB3GAP1 PRKAR2A PPP1R12A COTL1 PPIB CCT2 GSN ARRB1 TUBA4A	0.0108121037069746,16,1514,3.03983869846346,"Enzyme binding "," http://amigo.geneontology.org/amigo/term/GO:0019899"," CACYBP GRB2 MAPRE2 PLEK PPP3R1 VWF ENO1 RAB3GAP1 PRKAR2A PPP1R12A COTL1 PPIB CCT2 GSN ARRB1 TUBA4A"
0.0108121037069746	5	108	133168859649123	Carbon metabolism	http://www.genome.jp/kegg-bin/show_pathway?bta01200	ESD OGDH ALDOA ENO1 IDH2	0.0108121037069746,5,108,13.3168859649123,"Carbon metabolism","http://www.genome.jp/kegg-bin/show_pathway?bta01200 "," ESD OGDH ALDOA ENO1 IDH2"
0.0108121037069746	6	192	898889802631579	Focal adhesion	http://www.genome.jp/kegg-bin/show_pathway?bta04510	GRB2 ITGA2B MYL9 VWF PPP1R12A TLN1	0.0108121037069746,6,192,8.98889802631579,"Focal adhesion","http://www.genome.jp/kegg-bin/show_pathway?bta04510 "," GRB2 ITGA2B MYL9 VWF PPP1R12A TLN1"
0.0108121037069746	5	119	120859133126935	Platelet activation	http://www.genome.jp/kegg-bin/show_pathway?bta04611	ITGA2B VWF PPP1R12A TLN1 F2RL3	0.0108121037069746,5,119,12.0859133126935,"Platelet activation","http://www.genome.jp/kegg-bin/show_pathway?bta04611 "," ITGA2B VWF PPP1R12A TLN1 F2RL3"
0.011031674166314	5	124	11598578098472	Coagulation	http://amigo.geneontology.org/amigo/term/GO:0050817	PLEK MMRN1 VWF CD9 F2RL3	0.011031674166314,5,124,11.598578098472,"Coagulation "," http://amigo.geneontology.org/amigo/term/GO:0050817"," PLEK MMRN1 VWF CD9 F2RL3"
0.0112753871742463	5	126	114144736842105	Spliceosome	http://www.genome.jp/kegg-bin/show_pathway?bta03040	U2AF1 SNRNP40 HSPA1A PUF60 PRPF40A	0.0112753871742463,5,126,11.4144736842105,"Spliceosome","http://www.genome.jp/kegg-bin/show_pathway?bta03040 "," U2AF1 SNRNP40 HSPA1A PUF60 PRPF40A"
0.0113058748900574	4	66	17433014354067	Extracellular vesicle	http://amigo.geneontology.org/amigo/term/GO:1903561	ITGA2B ALDOA CLIC1 CD9	0.0113058748900574,4,66,17.433014354067,"Extracellular vesicle "," http://amigo.geneontology.org/amigo/term/GO:1903561"," ITGA2B ALDOA CLIC1 CD9"
0.011552962023845	4	68	169202786377709	Extracellular organelle	http://amigo.geneontology.org/amigo/term/GO:0043230	ITGA2B ALDOA CLIC1 CD9	0.011552962023845,4,68,16.9202786377709,"Extracellular organelle "," http://amigo.geneontology.org/amigo/term/GO:0043230"," ITGA2B ALDOA CLIC1 CD9"
0.011552962023845	4	68	169202786377709	Extracellular membrane-bounded organelle	http://amigo.geneontology.org/amigo/term/GO:0065010	ITGA2B ALDOA CLIC1 CD9	0.011552962023845,4,68,16.9202786377709,"Extracellular membrane-bounded organelle "," http://amigo.geneontology.org/amigo/term/GO:0065010"," ITGA2B ALDOA CLIC1 CD9"
0.0138311441482716	5	137	104979830964272	WP3276 Myometrial Relaxation and Contraction Pathways	http://www.wikipathways.org/instance/WP3276_r89455	YWHAZ ACTC1 PRKAR2A GABPA ARRB1	0.0138311441482716,5,137,10.4979830964272,"WP3276 Myometrial Relaxation and Contraction Pathways","http://www.wikipathways.org/instance/WP3276_r89455"," YWHAZ ACTC1 PRKAR2A GABPA ARRB1"
0.016182478794393	8	439	524181752787436	Protein domain specific binding	http://amigo.geneontology.org/amigo/term/GO:0019904	YWHAZ CACYBP GRB2 CCT6A PPP3R1 U2AF1 PRKAR2A TLN1	0.016182478794393,8,439,5.24181752787436,"Protein domain specific binding "," http://amigo.geneontology.org/amigo/term/GO:0019904"," YWHAZ CACYBP GRB2 CCT6A PPP3R1 U2AF1 PRKAR2A TLN1"
0.0164994965355996	4	77	149425837320574	Receptor internalization	http://amigo.geneontology.org/amigo/term/GO:0031623	GRB2 PPP3R1 CD9 ARRB1	0.0164994965355996,4,77,14.9425837320574,"Receptor internalization "," http://amigo.geneontology.org/amigo/term/GO:0031623"," GRB2 PPP3R1 CD9 ARRB1"
0.0173442829814844	2	6	958815789473684	Transcriptional activation of mitochondrial biogenesis	https://reactome.org/download/current	IDH2 GABPA	0.0173442829814844,2,6,95.8815789473684,"Transcriptional activation of mitochondrial biogenesis","https://reactome.org/download/current"," IDH2 GABPA"
0.0173442829814844	9	577	448665967344705	Actin cytoskeleton organization	http://amigo.geneontology.org/amigo/term/GO:0030036	WIPF1 MCU GRB2 ACTC1 PLEK PDLIM1 GSN ARRB1 TLN1	0.0173442829814844,9,577,4.48665967344705,"Actin cytoskeleton organization "," http://amigo.geneontology.org/amigo/term/GO:0030036"," WIPF1 MCU GRB2 ACTC1 PLEK PDLIM1 GSN ARRB1 TLN1"
0.0173442829814844	4	80	143822368421053	I band	http://amigo.geneontology.org/amigo/term/GO:0031674	ACTC1 PDLIM1 MYL9 PPP1R12A	0.0173442829814844,4,80,14.3822368421053,"I band "," http://amigo.geneontology.org/amigo/term/GO:0031674"," ACTC1 PDLIM1 MYL9 PPP1R12A"
0.0178419681794052	5	152	946199792243767	Protein folding	http://amigo.geneontology.org/amigo/term/GO:0006457	CCT6A PDCD5 FKBP2 PPIB CCT2	0.0178419681794052,5,152,9.46199792243767,"Protein folding "," http://amigo.geneontology.org/amigo/term/GO:0006457"," CCT6A PDCD5 FKBP2 PPIB CCT2"
0.0201874090812115	10	734	391886562455184	Positive regulation of cellular component organization	http://amigo.geneontology.org/amigo/term/GO:0051130	MCU GRB2 MAPRE2 CCT6A PDCD5 PLEK RAB3GAP1 CCT2 GSN ARRB1	0.0201874090812115,10,734,3.91886562455184,"Positive regulation of cellular component organization "," http://amigo.geneontology.org/amigo/term/GO:0051130"," MCU GRB2 MAPRE2 CCT6A PDCD5 PLEK RAB3GAP1 CCT2 GSN ARRB1"
0.0218826764544815	2	7	821842105263158	Association of TriC/CCT with target proteins during biosynthesis	https://reactome.org/download/current	CCT6A CCT2	0.0218826764544815,2,7,82.1842105263158,"Association of TriC/CCT with target proteins during biosynthesis","https://reactome.org/download/current"," CCT6A CCT2"
0.0272316502797036	7	374	538372502110892	Actin filament organization	http://amigo.geneontology.org/amigo/term/GO:0007015	WIPF1 MCU GRB2 ACTC1 PLEK GSN ARRB1	0.0272316502797036,7,374,5.38372502110892,"Actin filament organization "," http://amigo.geneontology.org/amigo/term/GO:0007015"," WIPF1 MCU GRB2 ACTC1 PLEK GSN ARRB1"
0.0272316502797036	9	632	409620669553631	Actin filament-based process	http://amigo.geneontology.org/amigo/term/GO:0030029	WIPF1 MCU GRB2 ACTC1 PLEK PDLIM1 GSN ARRB1 TLN1	0.0272316502797036,9,632,4.09620669553631,"Actin filament-based process "," http://amigo.geneontology.org/amigo/term/GO:0030029"," WIPF1 MCU GRB2 ACTC1 PLEK PDLIM1 GSN ARRB1 TLN1"
0.0272316502797036	2	8	719111842105263	3-hydroxyacyl-CoA dehydrogenase activity	http://amigo.geneontology.org/amigo/term/GO:0003857	HADHA HSD17B10	0.0272316502797036,2,8,71.9111842105263,"3-hydroxyacyl-CoA dehydrogenase activity "," http://amigo.geneontology.org/amigo/term/GO:0003857"," HADHA HSD17B10"
0.0290339360466325	4	99	11622009569378	WP2912 Vascular smooth muscle contraction	http://www.wikipathways.org/instance/WP2912_r87857	MYL6 MYL9 KCNMA1 PPP1R12A	0.0290339360466325,4,99,11.622009569378,"WP2912 Vascular smooth muscle contraction","http://www.wikipathways.org/instance/WP2912_r87857"," MYL6 MYL9 KCNMA1 PPP1R12A"
0.0290339360466325	8	509	452093888946334	Positive regulation of hydrolase activity	http://amigo.geneontology.org/amigo/term/GO:0051345	ADAP2 MAPRE2 PDCD5 PLEK RAB3GAP1 PPP1R12A RASA3 ARRB1	0.0290339360466325,8,509,4.52093888946334,"Positive regulation of hydrolase activity "," http://amigo.geneontology.org/amigo/term/GO:0051345"," ADAP2 MAPRE2 PDCD5 PLEK RAB3GAP1 PPP1R12A RASA3 ARRB1"
0.0290339360466325	2	9	639210526315789	Thrombin-activated receptor signaling pathway	http://amigo.geneontology.org/amigo/term/GO:0070493	PLEK F2RL3	0.0290339360466325,2,9,63.9210526315789,"Thrombin-activated receptor signaling pathway "," http://amigo.geneontology.org/amigo/term/GO:0070493"," PLEK F2RL3"
0.0290339360466325	2	9	639210526315789	Positive regulation of establishment of protein localization to telomere	http://amigo.geneontology.org/amigo/term/GO:1904851	CCT6A CCT2	0.0290339360466325,2,9,63.9210526315789,"Positive regulation of establishment of protein localization to telomere "," http://amigo.geneontology.org/amigo/term/GO:1904851"," CCT6A CCT2"
0.0290339360466325	9	652	397055618340329	Supramolecular fiber	http://amigo.geneontology.org/amigo/term/GO:0099512	WIPF1 ACTC1 CCT6A PDLIM1 MYL9 PPP1R12A CCT2 TUBA4A KRT78	0.0290339360466325,9,652,3.97055618340329,"Supramolecular fiber "," http://amigo.geneontology.org/amigo/term/GO:0099512"," WIPF1 ACTC1 CCT6A PDLIM1 MYL9 PPP1R12A CCT2 TUBA4A KRT78"
0.0290339360466325	6	274	629878985785632	Prion disease	http://www.genome.jp/kegg-bin/show_pathway?bta05020	PSMB3 MCU PPP3R1 STIP1 HSPA1A TUBA4A	0.0290339360466325,6,274,6.29878985785632,"Prion disease","http://www.genome.jp/kegg-bin/show_pathway?bta05020 "," PSMB3 MCU PPP3R1 STIP1 HSPA1A TUBA4A"
0.0301203315740645	3	43	200682374541004	Protein peptidyl-prolyl isomerization	http://amigo.geneontology.org/amigo/term/GO:0000413	FKBP1A FKBP2 PPIB	0.0301203315740645,3,43,20.0682374541004,"Protein peptidyl-prolyl isomerization "," http://amigo.geneontology.org/amigo/term/GO:0000413"," FKBP1A FKBP2 PPIB"
0.0302013065718004	9	660	392242822966507	Supramolecular polymer	http://amigo.geneontology.org/amigo/term/GO:0099081	WIPF1 ACTC1 CCT6A PDLIM1 MYL9 PPP1R12A CCT2 TUBA4A KRT78	0.0302013065718004,9,660,3.92242822966507,"Supramolecular polymer "," http://amigo.geneontology.org/amigo/term/GO:0099081"," WIPF1 ACTC1 CCT6A PDLIM1 MYL9 PPP1R12A CCT2 TUBA4A KRT78"
0.0335774345815249	2	10	575289473684211	Regulation of establishment of protein localization to telomere	http://amigo.geneontology.org/amigo/term/GO:0070203	CCT6A CCT2	0.0335774345815249,2,10,57.5289473684211,"Regulation of establishment of protein localization to telomere "," http://amigo.geneontology.org/amigo/term/GO:0070203"," CCT6A CCT2"
0.0344109710024106	7	411	489905877833269	Signaling by Rho GTPases	https://reactome.org/download/current	YWHAZ WIPF1 GRB2 SEH1L MYL6 MYL9 TUBA4A	0.0344109710024106,7,411,4.89905877833269,"Signaling by Rho GTPases","https://reactome.org/download/current"," YWHAZ WIPF1 GRB2 SEH1L MYL6 MYL9 TUBA4A"
0.0344109710024106	6	294	58703007518797	Establishment of protein localization to organelle	http://amigo.geneontology.org/amigo/term/GO:0072594	PMPCB CCT6A PDCD5 PPP3R1 RAB3GAP1 CCT2	0.0344109710024106,6,294,5.8703007518797,"Establishment of protein localization to organelle "," http://amigo.geneontology.org/amigo/term/GO:0072594"," PMPCB CCT6A PDCD5 PPP3R1 RAB3GAP1 CCT2"
0.0349236604603473	3	47	183603023516237	Sperm-egg recognition	http://amigo.geneontology.org/amigo/term/GO:0035036	ALDOA CD9 CCT2	0.0349236604603473,3,47,18.3603023516237,"Sperm-egg recognition "," http://amigo.geneontology.org/amigo/term/GO:0035036"," ALDOA CD9 CCT2"
0.0359327750252978	2	11	52299043062201	Regulation of establishment of protein localization to chromosome	http://amigo.geneontology.org/amigo/term/GO:0070202	CCT6A CCT2	0.0359327750252978,2,11,52.299043062201,"Regulation of establishment of protein localization to chromosome "," http://amigo.geneontology.org/amigo/term/GO:0070202"," CCT6A CCT2"
0.0359327750252978	2	11	52299043062201	Positive regulation of protein localization to chromosome, telomeric region	http://amigo.geneontology.org/amigo/term/GO:1904816	CCT6A CCT2	0.0359327750252978,2,11,52.299043062201,"Positive regulation of protein localization to chromosome, telomeric region "," http://amigo.geneontology.org/amigo/term/GO:1904816"," CCT6A CCT2"
0.0359327750252978	2	11	52299043062201	Chaperonin-containing T-complex	http://amigo.geneontology.org/amigo/term/GO:0005832	CCT6A CCT2	0.0359327750252978,2,11,52.299043062201,"Chaperonin-containing T-complex "," http://amigo.geneontology.org/amigo/term/GO:0005832"," CCT6A CCT2"
0.0360676545187972	12	1169	295272612669398	Cytoskeleton organization	http://amigo.geneontology.org/amigo/term/GO:0007010	WIPF1 MCU GRB2 ACTC1 PLEK PDLIM1 PPP1R12A GSN ARRB1 TLN1 TUBA4A PRPF40A	0.0360676545187972,12,1169,2.95272612669398,"Cytoskeleton organization "," http://amigo.geneontology.org/amigo/term/GO:0007010"," WIPF1 MCU GRB2 ACTC1 PLEK PDLIM1 PPP1R12A GSN ARRB1 TLN1 TUBA4A PRPF40A"
0.0360676545187972	3	49	176109022556391	Positive regulation of Ras protein signal transduction	http://amigo.geneontology.org/amigo/term/GO:0046579	MAPRE2 ARRB1 F2RL3	0.0360676545187972,3,49,17.6109022556391,"Positive regulation of Ras protein signal transduction "," http://amigo.geneontology.org/amigo/term/GO:0046579"," MAPRE2 ARRB1 F2RL3"
0.0372831402708663	2	12	479407894736842	Activation of BAD and translocation to mitochondria	https://reactome.org/download/current	YWHAZ PPP3R1	0.0372831402708663,2,12,47.9407894736842,"Activation of BAD and translocation to mitochondria","https://reactome.org/download/current"," YWHAZ PPP3R1"
0.0372831402708663	3	52	165948886639676	HSP90 chaperone cycle for steroid hormone receptors SHR	https://reactome.org/download/current	STIP1 HSPA1A TUBA4A	0.0372831402708663,3,52,16.5948886639676,"HSP90 chaperone cycle for steroid hormone receptors SHR","https://reactome.org/download/current"," STIP1 HSPA1A TUBA4A"
0.0372831402708663	5	205	701572528883183	Organelle biogenesis and maintenance	https://reactome.org/download/current	DYNLRB1 IDH2 GABPA CCT2 TUBA4A	0.0372831402708663,5,205,7.01572528883183,"Organelle biogenesis and maintenance","https://reactome.org/download/current"," DYNLRB1 IDH2 GABPA CCT2 TUBA4A"
0.0372831402708663	3	52	165948886639676	WP3151 Semaphorin interactions	http://www.wikipathways.org/instance/WP3151_r87654	MYL6 MYL9 TLN1	0.0372831402708663,3,52,16.5948886639676,"WP3151 Semaphorin interactions","http://www.wikipathways.org/instance/WP3151_r87654"," MYL6 MYL9 TLN1"
0.0372831402708663	3	52	165948886639676	Positive regulation of small GTPase mediated signal transduction	http://amigo.geneontology.org/amigo/term/GO:0051057	MAPRE2 ARRB1 F2RL3	0.0372831402708663,3,52,16.5948886639676,"Positive regulation of small GTPase mediated signal transduction "," http://amigo.geneontology.org/amigo/term/GO:0051057"," MAPRE2 ARRB1 F2RL3"
0.0372831402708663	4	117	983400809716599	Sarcomere	http://amigo.geneontology.org/amigo/term/GO:0030017	ACTC1 PDLIM1 MYL9 PPP1R12A	0.0372831402708663,4,117,9.83400809716599,"Sarcomere "," http://amigo.geneontology.org/amigo/term/GO:0030017"," ACTC1 PDLIM1 MYL9 PPP1R12A"
0.0372831402708663	3	51	169202786377709	Peptidyl-prolyl cis-trans isomerase activity	http://amigo.geneontology.org/amigo/term/GO:0003755	FKBP1A FKBP2 PPIB	0.0372831402708663,3,51,16.9202786377709,"Peptidyl-prolyl cis-trans isomerase activity "," http://amigo.geneontology.org/amigo/term/GO:0003755"," FKBP1A FKBP2 PPIB"
0.0379167361414919	4	120	958815789473684	Receptor metabolic process	http://amigo.geneontology.org/amigo/term/GO:0043112	GRB2 PPP3R1 CD9 ARRB1	0.0379167361414919,4,120,9.58815789473684,"Receptor metabolic process "," http://amigo.geneontology.org/amigo/term/GO:0043112"," GRB2 PPP3R1 CD9 ARRB1"
0.0402489677865169	3	54	159802631578947	Cis-trans isomerase activity	http://amigo.geneontology.org/amigo/term/GO:0016859	FKBP1A FKBP2 PPIB	0.0402489677865169,3,54,15.9802631578947,"Cis-trans isomerase activity "," http://amigo.geneontology.org/amigo/term/GO:0016859"," FKBP1A FKBP2 PPIB"
0.0404429710756823	4	124	927886247877759	Cell recognition	http://amigo.geneontology.org/amigo/term/GO:0008037	YWHAZ ALDOA CD9 CCT2	0.0404429710756823,4,124,9.27886247877759,"Cell recognition "," http://amigo.geneontology.org/amigo/term/GO:0008037"," YWHAZ ALDOA CD9 CCT2"
0.0404429710756823	3	55	156897129186603	Cell-cell recognition	http://amigo.geneontology.org/amigo/term/GO:0009988	ALDOA CD9 CCT2	0.0404429710756823,3,55,15.6897129186603,"Cell-cell recognition "," http://amigo.geneontology.org/amigo/term/GO:0009988"," ALDOA CD9 CCT2"
0.0404429710756823	2	13	44253036437247	Regulation of protein localization to chromosome, telomeric region	http://amigo.geneontology.org/amigo/term/GO:1904814	CCT6A CCT2	0.0404429710756823,2,13,44.253036437247,"Regulation of protein localization to chromosome, telomeric region "," http://amigo.geneontology.org/amigo/term/GO:1904814"," CCT6A CCT2"
0.0419598758099532	3	56	154095394736842	P00049 Parkinson disease	ftp://ftp.pantherdb.org/pathway/current_release	YWHAZ PSMB3 HSPA1A	0.0419598758099532,3,56,15.4095394736842,"P00049 Parkinson disease","ftp://ftp.pantherdb.org/pathway/current_release"," YWHAZ PSMB3 HSPA1A"
0.0425520206361637	2	14	410921052631579	Integrin alphaIIb beta3 signaling	https://reactome.org/download/current	ITGA2B TLN1	0.0425520206361637,2,14,41.0921052631579,"Integrin alphaIIb beta3 signaling","https://reactome.org/download/current"," ITGA2B TLN1"
0.0425520206361637	2	14	410921052631579	Platelet Aggregation Plug Formation	https://reactome.org/download/current	ITGA2B TLN1	0.0425520206361637,2,14,41.0921052631579,"Platelet Aggregation Plug Formation","https://reactome.org/download/current"," ITGA2B TLN1"
0.0425520206361637	2	14	410921052631579	Integrin signaling	https://reactome.org/download/current	ITGA2B TLN1	0.0425520206361637,2,14,41.0921052631579,"Integrin signaling","https://reactome.org/download/current"," ITGA2B TLN1"
0.0425520206361637	2	14	410921052631579	Establishment of protein localization to telomere	http://amigo.geneontology.org/amigo/term/GO:0070200	CCT6A CCT2	0.0425520206361637,2,14,41.0921052631579,"Establishment of protein localization to telomere "," http://amigo.geneontology.org/amigo/term/GO:0070200"," CCT6A CCT2"
0.0437916499247307	6	338	510611958891311	Cellular responses to stress	https://reactome.org/download/current	GSR NOX5 SEH1L STIP1 HSPA1A TUBA4A	0.0437916499247307,6,338,5.10611958891311,"Cellular responses to stress","https://reactome.org/download/current"," GSR NOX5 SEH1L STIP1 HSPA1A TUBA4A"
0.0437916499247307	3	59	146260035682426	Peptidyl-proline modification	http://amigo.geneontology.org/amigo/term/GO:0018208	FKBP1A FKBP2 PPIB	0.0437916499247307,3,59,14.6260035682426,"Peptidyl-proline modification "," http://amigo.geneontology.org/amigo/term/GO:0018208"," FKBP1A FKBP2 PPIB"
0.0437916499247307	5	226	6363821611551	Regulation of body fluid levels	http://amigo.geneontology.org/amigo/term/GO:0050878	PLEK MMRN1 VWF CD9 F2RL3	0.0437916499247307,5,226,6.363821611551,"Regulation of body fluid levels "," http://amigo.geneontology.org/amigo/term/GO:0050878"," PLEK MMRN1 VWF CD9 F2RL3"
0.0437916499247307	3	59	146260035682426	Regulation of response to endoplasmic reticulum stress	http://amigo.geneontology.org/amigo/term/GO:1905897	SGTA OPA1 MANF	0.0437916499247307,3,59,14.6260035682426,"Regulation of response to endoplasmic reticulum stress "," http://amigo.geneontology.org/amigo/term/GO:1905897"," SGTA OPA1 MANF"
0.0438693740678996	4	133	865096952908587	WP3130 SIDS Susceptibility Pathways	http://www.wikipathways.org/instance/WP3130_r101986	YWHAZ ALDOA PRKAR2A HADHA	0.0438693740678996,4,133,8.65096952908587,"WP3130 SIDS Susceptibility Pathways","http://www.wikipathways.org/instance/WP3130_r101986"," YWHAZ ALDOA PRKAR2A HADHA"
0.0438693740678996	13	1424	262597020993495	Protein-containing complex subunit organization	http://amigo.geneontology.org/amigo/term/GO:0043933	MCU GRB2 KCNA10 PLEK SEH1L TFG HSD17B10 CCT2 OPA1 GSN NAP1L4 TLN1 NAP1L1	0.0438693740678996,13,1424,2.62597020993495,"Protein-containing complex subunit organization "," http://amigo.geneontology.org/amigo/term/GO:0043933"," MCU GRB2 KCNA10 PLEK SEH1L TFG HSD17B10 CCT2 OPA1 GSN NAP1L4 TLN1 NAP1L1"
0.0438693740678996	11	1080	29297149122807	Establishment of protein localization	http://amigo.geneontology.org/amigo/term/GO:0045184	YWHAZ MCU PMPCB CCT6A PDCD5 PLEK PPP3R1 SEH1L RAB3GAP1 SGTA CCT2	0.0438693740678996,11,1080,2.9297149122807,"Establishment of protein localization "," http://amigo.geneontology.org/amigo/term/GO:0045184"," YWHAZ MCU PMPCB CCT6A PDCD5 PLEK PPP3R1 SEH1L RAB3GAP1 SGTA CCT2"
0.0438693740678996	10	917	313680192848534	Supramolecular complex	http://amigo.geneontology.org/amigo/term/GO:0099080	WIPF1 ACTC1 CCT6A SEH1L PDLIM1 MYL9 PPP1R12A CCT2 TUBA4A KRT78	0.0438693740678996,10,917,3.13680192848534,"Supramolecular complex "," http://amigo.geneontology.org/amigo/term/GO:0099080"," WIPF1 ACTC1 CCT6A SEH1L PDLIM1 MYL9 PPP1R12A CCT2 TUBA4A KRT78"
0.0438693740678996	8	610	377238999137187	Calcium ion binding	http://amigo.geneontology.org/amigo/term/GO:0005509	CPNE1 NOX5 MMRN1 PPP3R1 MYL6 MYL9 GSN CRELD2	0.0438693740678996,8,610,3.77238999137187,"Calcium ion binding "," http://amigo.geneontology.org/amigo/term/GO:0005509"," CPNE1 NOX5 MMRN1 PPP3R1 MYL6 MYL9 GSN CRELD2"
0.0438693740678996	2	15	383526315789474	Cyclosporin A binding	http://amigo.geneontology.org/amigo/term/GO:0016018	PPP3R1 PPIB	0.0438693740678996,2,15,38.3526315789474,"Cyclosporin A binding "," http://amigo.geneontology.org/amigo/term/GO:0016018"," PPP3R1 PPIB"
0.043961200027903	4	136	846013931888545	Focal adhesion	http://amigo.geneontology.org/amigo/term/GO:0005925	MAPRE2 ITGA2B GSN TLN1	0.043961200027903,4,136,8.46013931888545,"Focal adhesion "," http://amigo.geneontology.org/amigo/term/GO:0005925"," MAPRE2 ITGA2B GSN TLN1"
0.043961200027903	4	136	846013931888545	Myofibril	http://amigo.geneontology.org/amigo/term/GO:0030016	ACTC1 PDLIM1 MYL9 PPP1R12A	0.043961200027903,4,136,8.46013931888545,"Myofibril "," http://amigo.geneontology.org/amigo/term/GO:0030016"," ACTC1 PDLIM1 MYL9 PPP1R12A"
0.043961200027903	13	1437	260221404241292	Identical protein binding	http://amigo.geneontology.org/amigo/term/GO:0042802	CACYBP ESD XPNPEP1 GRB2 CPNE1 MAPRE2 ITGA2B PLEK VWF ENO1 SGTA TFG PUF60	0.043961200027903,13,1437,2.60221404241292,"Identical protein binding "," http://amigo.geneontology.org/amigo/term/GO:0042802"," CACYBP ESD XPNPEP1 GRB2 CPNE1 MAPRE2 ITGA2B PLEK VWF ENO1 SGTA TFG PUF60"
0.0446144298045112	4	137	839838647714176	Vascular smooth muscle contraction	http://www.genome.jp/kegg-bin/show_pathway?bta04270	MYL6 MYL9 KCNMA1 PPP1R12A	0.0446144298045112,4,137,8.39838647714176,"Vascular smooth muscle contraction","http://www.genome.jp/kegg-bin/show_pathway?bta04270 "," MYL6 MYL9 KCNMA1 PPP1R12A"
0.0451709418382012	9	772	335337128442869	Innate Immune System	https://reactome.org/download/current	WIPF1 GRB2 CPNE1 PPP3R1 RAB27A ALDOA COTL1 CCT2 HSPA1A	0.0451709418382012,9,772,3.35337128442869,"Innate Immune System","https://reactome.org/download/current"," WIPF1 GRB2 CPNE1 PPP3R1 RAB27A ALDOA COTL1 CCT2 HSPA1A"
0.0451709418382012	2	16	359555921052632	RHO GTPases activate PAKs	https://reactome.org/download/current	MYL6 MYL9	0.0451709418382012,2,16,35.9555921052632,"RHO GTPases activate PAKs","https://reactome.org/download/current"," MYL6 MYL9"
0.0451709418382012	12	1272	271362959285005	Protein-containing complex assembly	http://amigo.geneontology.org/amigo/term/GO:0065003	MCU GRB2 KCNA10 PLEK TFG HSD17B10 CCT2 OPA1 GSN NAP1L4 TLN1 NAP1L1	0.0451709418382012,12,1272,2.71362959285005,"Protein-containing complex assembly "," http://amigo.geneontology.org/amigo/term/GO:0065003"," MCU GRB2 KCNA10 PLEK TFG HSD17B10 CCT2 OPA1 GSN NAP1L4 TLN1 NAP1L1"
0.0460082927488802	3	64	134833470394737	Platelet activation	http://amigo.geneontology.org/amigo/term/GO:0030168	PLEK VWF CD9	0.0460082927488802,3,64,13.4833470394737,"Platelet activation "," http://amigo.geneontology.org/amigo/term/GO:0030168"," PLEK VWF CD9"
0.0466849897558361	10	940	306005039193729	Regulation of hydrolase activity	http://amigo.geneontology.org/amigo/term/GO:0051336	ADAP2 MAPRE2 PDCD5 PLEK RAB3GAP1 PPP1R12A RASA3 ARRB1 SERPINB2 OAS1Z	0.0466849897558361,10,940,3.06005039193729,"Regulation of hydrolase activity "," http://amigo.geneontology.org/amigo/term/GO:0051336"," ADAP2 MAPRE2 PDCD5 PLEK RAB3GAP1 PPP1R12A RASA3 ARRB1 SERPINB2 OAS1Z"
0.0466849897558361	4	141	816013437849944	Cell-substrate junction	http://amigo.geneontology.org/amigo/term/GO:0030055	MAPRE2 ITGA2B GSN TLN1	0.0466849897558361,4,141,8.16013437849944,"Cell-substrate junction "," http://amigo.geneontology.org/amigo/term/GO:0030055"," MAPRE2 ITGA2B GSN TLN1"
0.0475179723366556	2	17	338405572755418	WP999 TCA Cycle	http://www.wikipathways.org/instance/WP999_r80665	OGDH IDH2	0.0475179723366556,2,17,33.8405572755418,"WP999 TCA Cycle","http://www.wikipathways.org/instance/WP999_r80665"," OGDH IDH2"
0.0475179723366556	3	66	130747607655502	Purine ribonucleoside triphosphate metabolic process	http://amigo.geneontology.org/amigo/term/GO:0009205	ALDOA ENO1 OPA1	0.0475179723366556,3,66,13.0747607655502,"Purine ribonucleoside triphosphate metabolic process "," http://amigo.geneontology.org/amigo/term/GO:0009205"," ALDOA ENO1 OPA1"
0.0475179723366556	4	143	804600662495399	Contractile fiber	http://amigo.geneontology.org/amigo/term/GO:0043292	ACTC1 PDLIM1 MYL9 PPP1R12A	0.0475179723366556,4,143,8.04600662495399,"Contractile fiber "," http://amigo.geneontology.org/amigo/term/GO:0043292"," ACTC1 PDLIM1 MYL9 PPP1R12A"
0.048744419081447	6	363	475445846020009	Actin binding	http://amigo.geneontology.org/amigo/term/GO:0003779	WIPF1 PDLIM1 KCNMA1 COTL1 GSN TLN1	0.048744419081447,6,363,4.75445846020009,"Actin binding "," http://amigo.geneontology.org/amigo/term/GO:0003779"," WIPF1 PDLIM1 KCNMA1 COTL1 GSN TLN1"
0.048744419081447	10	952	302147832817337	Enzyme regulator activity	http://amigo.geneontology.org/amigo/term/GO:0030234	ADAP2 PDCD5 PPP3R1 RAB3GAP1 PRKAR2A PPP1R12A EEF1D RASA3 ARRB1 SERPINB2	0.048744419081447,10,952,3.02147832817337,"Enzyme regulator activity "," http://amigo.geneontology.org/amigo/term/GO:0030234"," ADAP2 PDCD5 PPP3R1 RAB3GAP1 PRKAR2A PPP1R12A EEF1D RASA3 ARRB1 SERPINB2"
0.0491675341548548	4	146	788067772170151	Oxytocin signaling pathway	http://www.genome.jp/kegg-bin/show_pathway?bta04921	PPP3R1 MYL6 MYL9 PPP1R12A	0.0491675341548548,4,146,7.88067772170151,"Oxytocin signaling pathway","http://www.genome.jp/kegg-bin/show_pathway?bta04921 "," PPP3R1 MYL6 MYL9 PPP1R12A"
0.0499283769491383	5	248	579928904923599	Wound healing	http://amigo.geneontology.org/amigo/term/GO:0042060	PLEK MMRN1 VWF CD9 F2RL3	0.0499283769491383,5,248,5.79928904923599,"Wound healing "," http://amigo.geneontology.org/amigo/term/GO:0042060"," PLEK MMRN1 VWF CD9 F2RL3"
0.0502222419618044	2	18	319605263157895	Activation of BH3-only proteins	https://reactome.org/download/current	YWHAZ PPP3R1	0.0502222419618044,2,18,31.9605263157895,"Activation of BH3-only proteins","https://reactome.org/download/current"," YWHAZ PPP3R1"
0.0506621639666807	3	69	125062929061785	Bta-mir-2406 target gene	https://www.mirnet.ca	OGDH COTL1 ARRB1	0.0506621639666807,3,69,12.5062929061785,"Bta-mir-2406 target gene","https://www.mirnet.ca"," OGDH COTL1 ARRB1"
0.0517325669237323	3	70	123276315789474	Purine nucleoside triphosphate metabolic process	http://amigo.geneontology.org/amigo/term/GO:0009144	ALDOA ENO1 OPA1	0.0517325669237323,3,70,12.3276315789474,"Purine nucleoside triphosphate metabolic process "," http://amigo.geneontology.org/amigo/term/GO:0009144"," ALDOA ENO1 OPA1"
0.0517325669237323	3	70	123276315789474	Z disc	http://amigo.geneontology.org/amigo/term/GO:0030018	PDLIM1 MYL9 PPP1R12A	0.0517325669237323,3,70,12.3276315789474,"Z disc "," http://amigo.geneontology.org/amigo/term/GO:0030018"," PDLIM1 MYL9 PPP1R12A"
0.0523753651951967	2	19	302783933518006	WP3251 Blood Clotting Cascade	http://www.wikipathways.org/instance/WP3251_r86998	VWF SERPINB2	0.0523753651951967,2,19,30.2783933518006,"WP3251 Blood Clotting Cascade","http://www.wikipathways.org/instance/WP3251_r86998"," VWF SERPINB2"
0.0523753651951967	2	19	302783933518006	Positive regulation of protein processing	http://amigo.geneontology.org/amigo/term/GO:0010954	ENO1 GSN	0.0523753651951967,2,19,30.2783933518006,"Positive regulation of protein processing "," http://amigo.geneontology.org/amigo/term/GO:0010954"," ENO1 GSN"
0.0523753651951967	7	510	394806501547988	Polymeric cytoskeletal fiber	http://amigo.geneontology.org/amigo/term/GO:0099513	WIPF1 ACTC1 CCT6A PDLIM1 CCT2 TUBA4A KRT78	0.0523753651951967,7,510,3.94806501547988,"Polymeric cytoskeletal fiber "," http://amigo.geneontology.org/amigo/term/GO:0099513"," WIPF1 ACTC1 CCT6A PDLIM1 CCT2 TUBA4A KRT78"
0.0523753651951967	3	71	121540029651594	Biosynthesis of amino acids	http://www.genome.jp/kegg-bin/show_pathway?bta01230	ALDOA ENO1 IDH2	0.0523753651951967,3,71,12.1540029651594,"Biosynthesis of amino acids","http://www.genome.jp/kegg-bin/show_pathway?bta01230 "," ALDOA ENO1 IDH2"
0.052726083792154	4	153	752012383900929	Isomerase activity	http://amigo.geneontology.org/amigo/term/GO:0016853	FKBP1A FKBP2 PPIB CRELD2	0.052726083792154,4,153,7.52012383900929,"Isomerase activity "," http://amigo.geneontology.org/amigo/term/GO:0016853"," FKBP1A FKBP2 PPIB CRELD2"
0.0528791237933103	3	72	119851973684211	Apoptosis	https://reactome.org/download/current	YWHAZ PPP3R1 OPA1	0.0528791237933103,3,72,11.9851973684211,"Apoptosis","https://reactome.org/download/current"," YWHAZ PPP3R1 OPA1"
0.0544895817230983	3	73	118210165825523	Ribonucleoside triphosphate metabolic process	http://amigo.geneontology.org/amigo/term/GO:0009199	ALDOA ENO1 OPA1	0.0544895817230983,3,73,11.8210165825523,"Ribonucleoside triphosphate metabolic process "," http://amigo.geneontology.org/amigo/term/GO:0009199"," ALDOA ENO1 OPA1"
0.0551888465986536	2	20	287644736842105	Positive regulation of phosphatase activity	http://amigo.geneontology.org/amigo/term/GO:0010922	PLEK PPP1R12A	0.0551888465986536,2,20,28.7644736842105,"Positive regulation of phosphatase activity "," http://amigo.geneontology.org/amigo/term/GO:0010922"," PLEK PPP1R12A"
0.0551888465986536	2	20	287644736842105	Integrin activation	http://amigo.geneontology.org/amigo/term/GO:0033622	PLEK TLN1	0.0551888465986536,2,20,28.7644736842105,"Integrin activation "," http://amigo.geneontology.org/amigo/term/GO:0033622"," PLEK TLN1"
0.0565431350191996	4	158	728214523650899	Regulation of Ras protein signal transduction	http://amigo.geneontology.org/amigo/term/GO:0046578	MAPRE2 RASA3 ARRB1 F2RL3	0.0565431350191996,4,158,7.28214523650899,"Regulation of Ras protein signal transduction "," http://amigo.geneontology.org/amigo/term/GO:0046578"," MAPRE2 RASA3 ARRB1 F2RL3"
0.0573253821095615	4	159	723634558093346	Receptor-mediated endocytosis	http://amigo.geneontology.org/amigo/term/GO:0006898	GRB2 PPP3R1 CD9 ARRB1	0.0573253821095615,4,159,7.23634558093346,"Receptor-mediated endocytosis "," http://amigo.geneontology.org/amigo/term/GO:0006898"," GRB2 PPP3R1 CD9 ARRB1"
0.0586875394717176	2	21	273947368421053	Establishment of protein localization to chromosome	http://amigo.geneontology.org/amigo/term/GO:0070199	CCT6A CCT2	0.0586875394717176,2,21,27.3947368421053,"Establishment of protein localization to chromosome "," http://amigo.geneontology.org/amigo/term/GO:0070199"," CCT6A CCT2"
0.0586875394717176	2	21	273947368421053	Positive regulation of protein maturation	http://amigo.geneontology.org/amigo/term/GO:1903319	ENO1 GSN	0.0586875394717176,2,21,27.3947368421053,"Positive regulation of protein maturation "," http://amigo.geneontology.org/amigo/term/GO:1903319"," ENO1 GSN"
0.0607995137584443	3	79	109232178547635	Programmed Cell Death	https://reactome.org/download/current	YWHAZ PPP3R1 OPA1	0.0607995137584443,3,79,10.9232178547635,"Programmed Cell Death","https://reactome.org/download/current"," YWHAZ PPP3R1 OPA1"
0.0607995137584443	2	22	261495215311005	FCERI mediated Ca+2 mobilization	https://reactome.org/download/current	GRB2 PPP3R1	0.0607995137584443,2,22,26.1495215311005,"FCERI mediated Ca+2 mobilization","https://reactome.org/download/current"," GRB2 PPP3R1"
0.0607995137584443	9	847	30564375815572	Regulation of organelle organization	http://amigo.geneontology.org/amigo/term/GO:0033043	MCU GRB2 CCT6A PDCD5 PLEK RAB3GAP1 CCT2 OPA1 GSN	0.0607995137584443,9,847,3.0564375815572,"Regulation of organelle organization "," http://amigo.geneontology.org/amigo/term/GO:0033043"," MCU GRB2 CCT6A PDCD5 PLEK RAB3GAP1 CCT2 OPA1 GSN"
0.0607995137584443	15	1947	221606114670343	Intracellular signal transduction	http://amigo.geneontology.org/amigo/term/GO:0035556	YWHAZ ADAP2 MCU GRB2 CPNE1 MAPRE2 PLEK PPP3R1 SEH1L VWF ENO1 OPA1 RASA3 ARRB1 F2RL3	0.0607995137584443,15,1947,2.21606114670343,"Intracellular signal transduction "," http://amigo.geneontology.org/amigo/term/GO:0035556"," YWHAZ ADAP2 MCU GRB2 CPNE1 MAPRE2 PLEK PPP3R1 SEH1L VWF ENO1 OPA1 RASA3 ARRB1 F2RL3"
0.0607995137584443	14	1746	230642973412914	Cytoskeleton	http://amigo.geneontology.org/amigo/term/GO:0005856	WIPF1 ACTC1 DYNLRB1 MAPRE2 CCT6A PDLIM1 MYL9 ALDOA PRKAR2A PPP1R12A CCT2 TLN1 TUBA4A KRT78	0.0607995137584443,14,1746,2.30642973412914,"Cytoskeleton "," http://amigo.geneontology.org/amigo/term/GO:0005856"," WIPF1 ACTC1 DYNLRB1 MAPRE2 CCT6A PDLIM1 MYL9 ALDOA PRKAR2A PPP1R12A CCT2 TLN1 TUBA4A KRT78"
0.0607995137584443	6	396	435825358851675	Actin cytoskeleton	http://amigo.geneontology.org/amigo/term/GO:0015629	WIPF1 ACTC1 PDLIM1 MYL9 ALDOA PPP1R12A	0.0607995137584443,6,396,4.35825358851675,"Actin cytoskeleton "," http://amigo.geneontology.org/amigo/term/GO:0015629"," WIPF1 ACTC1 PDLIM1 MYL9 ALDOA PPP1R12A"
0.0607995137584443	4	164	701572528883183	CGMP-PKG signaling pathway	http://www.genome.jp/kegg-bin/show_pathway?bta04022	PPP3R1 MYL9 KCNMA1 PPP1R12A	0.0607995137584443,4,164,7.01572528883183,"CGMP-PKG signaling pathway","http://www.genome.jp/kegg-bin/show_pathway?bta04022 "," PPP3R1 MYL9 KCNMA1 PPP1R12A"
0.0614017858050771	4	166	693119847812302	Muscle contraction	https://reactome.org/download/current	ACTC1 MYL6 MYL9 TLN1	0.0614017858050771,4,166,6.93119847812302,"Muscle contraction","https://reactome.org/download/current"," ACTC1 MYL6 MYL9 TLN1"
0.0637260260020283	2	23	25012585812357	Gluconeogenesis	https://reactome.org/download/current	ALDOA ENO1	0.0637260260020283,2,23,25.012585812357,"Gluconeogenesis","https://reactome.org/download/current"," ALDOA ENO1"
0.0637260260020283	5	279	515492359932088	Purine ribonucleotide metabolic process	http://amigo.geneontology.org/amigo/term/GO:0009150	OGDH GART ALDOA ENO1 OPA1	0.0637260260020283,5,279,5.15492359932088,"Purine ribonucleotide metabolic process "," http://amigo.geneontology.org/amigo/term/GO:0009150"," OGDH GART ALDOA ENO1 OPA1"
0.0637260260020283	2	23	25012585812357	Chaperone complex	http://amigo.geneontology.org/amigo/term/GO:0101031	CCT6A CCT2	0.0637260260020283,2,23,25.012585812357,"Chaperone complex "," http://amigo.geneontology.org/amigo/term/GO:0101031"," CCT6A CCT2"
0.0637260260020283	2	23	25012585812357	Protein folding chaperone	http://amigo.geneontology.org/amigo/term/GO:0044183	CCT6A CCT2	0.0637260260020283,2,23,25.012585812357,"Protein folding chaperone "," http://amigo.geneontology.org/amigo/term/GO:0044183"," CCT6A CCT2"
0.0638292186353205	3	82	105235879332478	Integrin-mediated signaling pathway	http://amigo.geneontology.org/amigo/term/GO:0007229	ITGA2B PLEK TLN1	0.0638292186353205,3,82,10.5235879332478,"Integrin-mediated signaling pathway "," http://amigo.geneontology.org/amigo/term/GO:0007229"," ITGA2B PLEK TLN1"
0.0638292186353205	3	82	105235879332478	Complement and coagulation cascades	http://www.genome.jp/kegg-bin/show_pathway?bta04610	VWF SERPINB2 F2RL3	0.0638292186353205,3,82,10.5235879332478,"Complement and coagulation cascades","http://www.genome.jp/kegg-bin/show_pathway?bta04610 "," VWF SERPINB2 F2RL3"
0.0658371697396253	6	413	417885816235504	Cellular responses to external stimuli	https://reactome.org/download/current	GSR NOX5 SEH1L STIP1 HSPA1A TUBA4A	0.0658371697396253,6,413,4.17885816235504,"Cellular responses to external stimuli","https://reactome.org/download/current"," GSR NOX5 SEH1L STIP1 HSPA1A TUBA4A"
0.0658371697396253	3	84	102730263157895	WP1069 Integrin-mediated Cell Adhesion	http://www.wikipathways.org/instance/WP1069_r80667	GRB2 ITGA2B TLN1	0.0658371697396253,3,84,10.2730263157895,"WP1069 Integrin-mediated Cell Adhesion","http://www.wikipathways.org/instance/WP1069_r80667"," GRB2 ITGA2B TLN1"
0.0658371697396253	2	24	239703947368421	WP3181 Nanoparticle-mediated activation of receptor signaling	http://www.wikipathways.org/instance/WP3181_r102085	GRB2 TLN1	0.0658371697396253,2,24,23.9703947368421,"WP3181 Nanoparticle-mediated activation of receptor signaling","http://www.wikipathways.org/instance/WP3181_r102085"," GRB2 TLN1"
0.0658371697396253	3	84	102730263157895	Actin cytoskeleton reorganization	http://amigo.geneontology.org/amigo/term/GO:0031532	MCU GRB2 PLEK	0.0658371697396253,3,84,10.2730263157895,"Actin cytoskeleton reorganization "," http://amigo.geneontology.org/amigo/term/GO:0031532"," MCU GRB2 PLEK"
0.0658371697396253	7	553	36410726182545	Kinase binding	http://amigo.geneontology.org/amigo/term/GO:0019900	GRB2 MAPRE2 PLEK PRKAR2A PPP1R12A GSN TUBA4A	0.0658371697396253,7,553,3.6410726182545,"Kinase binding "," http://amigo.geneontology.org/amigo/term/GO:0019900"," GRB2 MAPRE2 PLEK PRKAR2A PPP1R12A GSN TUBA4A"
0.0674483814472579	3	85	101521671826625	Actin filament-based movement	http://amigo.geneontology.org/amigo/term/GO:0030048	WIPF1 ACTC1 GSN	0.0674483814472579,3,85,10.1521671826625,"Actin filament-based movement "," http://amigo.geneontology.org/amigo/term/GO:0030048"," WIPF1 ACTC1 GSN"
0.0691890131923663	3	86	100341187270502	Actin filament	http://amigo.geneontology.org/amigo/term/GO:0005884	WIPF1 ACTC1 PDLIM1	0.0691890131923663,3,86,10.0341187270502,"Actin filament "," http://amigo.geneontology.org/amigo/term/GO:0005884"," WIPF1 ACTC1 PDLIM1"
0.06922571028161	4	177	650044603033006	Bta-mir-2316 target gene	https://www.mirnet.ca	IDH2 ATP6V1D RASA3 NAP1L4	0.06922571028161,4,177,6.50044603033006,"Bta-mir-2316 target gene","https://www.mirnet.ca"," IDH2 ATP6V1D RASA3 NAP1L4"
0.0704235776401795	3	87	991878402903811	Regulation of mitochondrion organization	http://amigo.geneontology.org/amigo/term/GO:0010821	MCU PDCD5 OPA1	0.0704235776401795,3,87,9.91878402903811,"Regulation of mitochondrion organization "," http://amigo.geneontology.org/amigo/term/GO:0010821"," MCU PDCD5 OPA1"
0.0731668204448112	2	26	221265182186235	Mitochondrial biogenesis	https://reactome.org/download/current	IDH2 GABPA	0.0731668204448112,2,26,22.1265182186235,"Mitochondrial biogenesis","https://reactome.org/download/current"," IDH2 GABPA"
0.0731668204448112	5	295	487533452274755	Ribonucleotide metabolic process	http://amigo.geneontology.org/amigo/term/GO:0009259	OGDH GART ALDOA ENO1 OPA1	0.0731668204448112,5,295,4.87533452274755,"Ribonucleotide metabolic process "," http://amigo.geneontology.org/amigo/term/GO:0009259"," OGDH GART ALDOA ENO1 OPA1"
0.0731668204448112	9	892	290224510266698	Positive regulation of catalytic activity	http://amigo.geneontology.org/amigo/term/GO:0043085	ADAP2 MAPRE2 PDCD5 PLEK RAB3GAP1 PPP1R12A CCT2 RASA3 ARRB1	0.0731668204448112,9,892,2.90224510266698,"Positive regulation of catalytic activity "," http://amigo.geneontology.org/amigo/term/GO:0043085"," ADAP2 MAPRE2 PDCD5 PLEK RAB3GAP1 PPP1R12A CCT2 RASA3 ARRB1"
0.0731668204448112	5	296	485886379800854	Positive regulation of GTPase activity	http://amigo.geneontology.org/amigo/term/GO:0043547	ADAP2 MAPRE2 RAB3GAP1 RASA3 ARRB1	0.0731668204448112,5,296,4.85886379800854,"Positive regulation of GTPase activity "," http://amigo.geneontology.org/amigo/term/GO:0043547"," ADAP2 MAPRE2 RAB3GAP1 RASA3 ARRB1"
0.0731681815580256	5	297	484250398724083	Purine nucleotide metabolic process	http://amigo.geneontology.org/amigo/term/GO:0006163	OGDH GART ALDOA ENO1 OPA1	0.0731681815580256,5,297,4.84250398724083,"Purine nucleotide metabolic process "," http://amigo.geneontology.org/amigo/term/GO:0006163"," OGDH GART ALDOA ENO1 OPA1"
0.0731681815580256	4	182	632186234817814	Positive regulation of establishment of protein localization	http://amigo.geneontology.org/amigo/term/GO:1904951	MCU CCT6A PDCD5 CCT2	0.0731681815580256,4,182,6.32186234817814,"Positive regulation of establishment of protein localization "," http://amigo.geneontology.org/amigo/term/GO:1904951"," MCU CCT6A PDCD5 CCT2"
0.0735705370448886	4	183	628731665228645	Actin polymerization or depolymerization	http://amigo.geneontology.org/amigo/term/GO:0008154	WIPF1 GRB2 PLEK GSN	0.0735705370448886,4,183,6.28731665228645,"Actin polymerization or depolymerization "," http://amigo.geneontology.org/amigo/term/GO:0008154"," WIPF1 GRB2 PLEK GSN"
0.0740923652224773	13	1631	22926925683307	Regulation of cellular component organization	http://amigo.geneontology.org/amigo/term/GO:0051128	MCU GRB2 MAPRE2 CCT6A PDCD5 PLEK PPP3R1 ENO1 RAB3GAP1 CCT2 OPA1 GSN ARRB1	0.0740923652224773,13,1631,2.2926925683307,"Regulation of cellular component organization "," http://amigo.geneontology.org/amigo/term/GO:0051128"," MCU GRB2 MAPRE2 CCT6A PDCD5 PLEK PPP3R1 ENO1 RAB3GAP1 CCT2 OPA1 GSN ARRB1"
0.0742408660867835	2	27	213070175438596	Regulation of platelet activation	http://amigo.geneontology.org/amigo/term/GO:0010543	PLEK CD9	0.0742408660867835,2,27,21.3070175438596,"Regulation of platelet activation "," http://amigo.geneontology.org/amigo/term/GO:0010543"," PLEK CD9"
0.0742408660867835	5	300	479407894736842	Ribose phosphate metabolic process	http://amigo.geneontology.org/amigo/term/GO:0019693	OGDH GART ALDOA ENO1 OPA1	0.0742408660867835,5,300,4.79407894736842,"Ribose phosphate metabolic process "," http://amigo.geneontology.org/amigo/term/GO:0019693"," OGDH GART ALDOA ENO1 OPA1"
0.0742408660867835	2	27	213070175438596	Protein localization to chromosome, telomeric region	http://amigo.geneontology.org/amigo/term/GO:0070198	CCT6A CCT2	0.0742408660867835,2,27,21.3070175438596,"Protein localization to chromosome, telomeric region "," http://amigo.geneontology.org/amigo/term/GO:0070198"," CCT6A CCT2"
0.0752950063357274	4	186	618590831918506	Regulation of small GTPase mediated signal transduction	http://amigo.geneontology.org/amigo/term/GO:0051056	MAPRE2 RASA3 ARRB1 F2RL3	0.0752950063357274,4,186,6.18590831918506,"Regulation of small GTPase mediated signal transduction "," http://amigo.geneontology.org/amigo/term/GO:0051056"," MAPRE2 RASA3 ARRB1 F2RL3"
0.0757108917015802	4	187	615282859555305	Protein complex oligomerization	http://amigo.geneontology.org/amigo/term/GO:0051259	MCU KCNA10 HSD17B10 OPA1	0.0757108917015802,4,187,6.15282859555305,"Protein complex oligomerization "," http://amigo.geneontology.org/amigo/term/GO:0051259"," MCU KCNA10 HSD17B10 OPA1"
0.0757108917015802	4	187	615282859555305	Bta-mir-2381 target gene	https://www.mirnet.ca	SEH1L COTL1 RASA3 F2RL3	0.0757108917015802,4,187,6.15282859555305,"Bta-mir-2381 target gene","https://www.mirnet.ca"," SEH1L COTL1 RASA3 F2RL3"
0.0771309201149397	2	28	205460526315789	Positive regulation of telomere maintenance via telomerase	http://amigo.geneontology.org/amigo/term/GO:0032212	CCT6A CCT2	0.0771309201149397,2,28,20.5460526315789,"Positive regulation of telomere maintenance via telomerase "," http://amigo.geneontology.org/amigo/term/GO:0032212"," CCT6A CCT2"
0.0771309201149397	2	28	205460526315789	Positive regulation of Rho protein signal transduction	http://amigo.geneontology.org/amigo/term/GO:0035025	ARRB1 F2RL3	0.0771309201149397,2,28,20.5460526315789,"Positive regulation of Rho protein signal transduction "," http://amigo.geneontology.org/amigo/term/GO:0035025"," ARRB1 F2RL3"
0.0791457683746545	5	308	466955741626794	Response to wounding	http://amigo.geneontology.org/amigo/term/GO:0009611	PLEK MMRN1 VWF CD9 F2RL3	0.0791457683746545,5,308,4.66955741626794,"Response to wounding "," http://amigo.geneontology.org/amigo/term/GO:0009611"," PLEK MMRN1 VWF CD9 F2RL3"
0.0795515445593279	3	95	908351800554017	Nucleoside triphosphate metabolic process	http://amigo.geneontology.org/amigo/term/GO:0009141	ALDOA ENO1 OPA1	0.0795515445593279,3,95,9.08351800554017,"Nucleoside triphosphate metabolic process "," http://amigo.geneontology.org/amigo/term/GO:0009141"," ALDOA ENO1 OPA1"
0.0835696979271517	7	597	337271885744512	Supramolecular fiber organization	http://amigo.geneontology.org/amigo/term/GO:0097435	WIPF1 MCU GRB2 ACTC1 PLEK GSN ARRB1	0.0835696979271517,7,597,3.37271885744512,"Supramolecular fiber organization "," http://amigo.geneontology.org/amigo/term/GO:0097435"," WIPF1 MCU GRB2 ACTC1 PLEK GSN ARRB1"
0.0844493587159933	2	30	191763157894737	Detoxification of Reactive Oxygen Species	https://reactome.org/download/current	GSR NOX5	0.0844493587159933,2,30,19.1763157894737,"Detoxification of Reactive Oxygen Species","https://reactome.org/download/current"," GSR NOX5"
0.0844493587159933	2	30	191763157894737	Mitochondrial fission	http://amigo.geneontology.org/amigo/term/GO:0000266	MCU OPA1	0.0844493587159933,2,30,19.1763157894737,"Mitochondrial fission "," http://amigo.geneontology.org/amigo/term/GO:0000266"," MCU OPA1"
0.0844493587159933	2	30	191763157894737	Positive regulation of telomere maintenance via telomere lengthening	http://amigo.geneontology.org/amigo/term/GO:1904358	CCT6A CCT2	0.0844493587159933,2,30,19.1763157894737,"Positive regulation of telomere maintenance via telomere lengthening "," http://amigo.geneontology.org/amigo/term/GO:1904358"," CCT6A CCT2"
0.0844493587159933	2	30	191763157894737	Citrate cycle (TCA cycle)	http://www.genome.jp/kegg-bin/show_pathway?bta00020	OGDH IDH2	0.0844493587159933,2,30,19.1763157894737,"Citrate cycle (TCA cycle)","http://www.genome.jp/kegg-bin/show_pathway?bta00020 "," OGDH IDH2"
0.0853846556654027	5	317	453698323094803	Purine-containing compound metabolic process	http://amigo.geneontology.org/amigo/term/GO:0072521	OGDH GART ALDOA ENO1 OPA1	0.0853846556654027,5,317,4.53698323094803,"Purine-containing compound metabolic process "," http://amigo.geneontology.org/amigo/term/GO:0072521"," OGDH GART ALDOA ENO1 OPA1"
0.087271073747696	4	199	578180375562021	Muscle contraction	http://amigo.geneontology.org/amigo/term/GO:0006936	ALDOA KCNMA1 ENO1 GSN	0.087271073747696,4,199,5.78180375562021,"Muscle contraction "," http://amigo.geneontology.org/amigo/term/GO:0006936"," ALDOA KCNMA1 ENO1 GSN"
0.087271073747696	3	100	862934210526316	Integrin binding	http://amigo.geneontology.org/amigo/term/GO:0005178	VWF CD9 TLN1	0.087271073747696,3,100,8.62934210526316,"Integrin binding "," http://amigo.geneontology.org/amigo/term/GO:0005178"," VWF CD9 TLN1"
0.0878471669932002	2	31	185577249575552	WP969 Striated Muscle Contraction	http://www.wikipathways.org/instance/WP969_r87848	ACTC1 MYL9	0.0878471669932002,2,31,18.5577249575552,"WP969 Striated Muscle Contraction","http://www.wikipathways.org/instance/WP969_r87848"," ACTC1 MYL9"
0.0892804316393807	4	201	572427336999214	WP998 MAPK Signaling Pathway	http://www.wikipathways.org/instance/WP998_r96305	GRB2 PPP3R1 ARRB1 HSPA1A	0.0892804316393807,4,201,5.72427336999214,"WP998 MAPK Signaling Pathway","http://www.wikipathways.org/instance/WP998_r96305"," GRB2 PPP3R1 ARRB1 HSPA1A"
0.0906944919184902	2	32	179777960526316	Regulation of mRNA stability by proteins that bind AU-rich elements	https://reactome.org/download/current	YWHAZ HSPA1A	0.0906944919184902,2,32,17.9777960526316,"Regulation of mRNA stability by proteins that bind AU-rich elements","https://reactome.org/download/current"," YWHAZ HSPA1A"
0.0906944919184902	2	32	179777960526316	Negative regulation of G protein-coupled receptor signaling pathway	http://amigo.geneontology.org/amigo/term/GO:0045744	PLEK ARRB1	0.0906944919184902,2,32,17.9777960526316,"Negative regulation of G protein-coupled receptor signaling pathway "," http://amigo.geneontology.org/amigo/term/GO:0045744"," PLEK ARRB1"
0.0906944919184902	2	32	179777960526316	Regulation of release of cytochrome c from mitochondria	http://amigo.geneontology.org/amigo/term/GO:0090199	PDCD5 OPA1	0.0906944919184902,2,32,17.9777960526316,"Regulation of release of cytochrome c from mitochondria "," http://amigo.geneontology.org/amigo/term/GO:0090199"," PDCD5 OPA1"
0.0906944919184902	2	32	179777960526316	Negative regulation of response to endoplasmic reticulum stress	http://amigo.geneontology.org/amigo/term/GO:1903573	SGTA OPA1	0.0906944919184902,2,32,17.9777960526316,"Negative regulation of response to endoplasmic reticulum stress "," http://amigo.geneontology.org/amigo/term/GO:1903573"," SGTA OPA1"
0.092179661484776	12	1509	228743329496704	Immune System	https://reactome.org/download/current	YWHAZ WIPF1 GRB2 CPNE1 PPP3R1 RAB27A ALDOA COTL1 CCT2 RASA3 ARRB1 HSPA1A	0.092179661484776,12,1509,2.28743329496704,"Immune System","https://reactome.org/download/current"," YWHAZ WIPF1 GRB2 CPNE1 PPP3R1 RAB27A ALDOA COTL1 CCT2 RASA3 ARRB1 HSPA1A"
0.0925051094860295	6	467	369564972388144	Neutrophil degranulation	https://reactome.org/download/current	CPNE1 RAB27A ALDOA COTL1 CCT2 HSPA1A	0.0925051094860295,6,467,3.69564972388144,"Neutrophil degranulation","https://reactome.org/download/current"," CPNE1 RAB27A ALDOA COTL1 CCT2 HSPA1A"
0.0940761753065618	2	33	17433014354067	Thrombin signalling through proteinase activated receptors PARs	https://reactome.org/download/current	ARRB1 F2RL3	0.0940761753065618,2,33,17.433014354067,"Thrombin signalling through proteinase activated receptors PARs","https://reactome.org/download/current"," ARRB1 F2RL3"
0.0940761753065618	2	33	17433014354067	Intrinsic Pathway for Apoptosis	https://reactome.org/download/current	YWHAZ PPP3R1	0.0940761753065618,2,33,17.433014354067,"Intrinsic Pathway for Apoptosis","https://reactome.org/download/current"," YWHAZ PPP3R1"
0.0979769839608785	2	34	169202786377709	RHO GTPases Activate WASPs and WAVEs	https://reactome.org/download/current	WIPF1 GRB2	0.0979769839608785,2,34,16.9202786377709,"RHO GTPases Activate WASPs and WAVEs","https://reactome.org/download/current"," WIPF1 GRB2"
0.0979769839608785	2	34	169202786377709	Regulation of receptor internalization	http://amigo.geneontology.org/amigo/term/GO:0002090	PPP3R1 ARRB1	0.0979769839608785,2,34,16.9202786377709,"Regulation of receptor internalization "," http://amigo.geneontology.org/amigo/term/GO:0002090"," PPP3R1 ARRB1"
0.0979769839608785	2	34	169202786377709	Cortical actin cytoskeleton organization	http://amigo.geneontology.org/amigo/term/GO:0030866	PLEK TLN1	0.0979769839608785,2,34,16.9202786377709,"Cortical actin cytoskeleton organization "," http://amigo.geneontology.org/amigo/term/GO:0030866"," PLEK TLN1"
0.0979769839608785	11	1336	236833241411913	Cell junction	http://amigo.geneontology.org/amigo/term/GO:0030054	YWHAZ GRB2 ACTC1 MAPRE2 ITGA2B PPP3R1 PDLIM1 SYPL1 GSN TLN1 PUF60	0.0979769839608785,11,1336,2.36833241411913,"Cell junction "," http://amigo.geneontology.org/amigo/term/GO:0030054"," YWHAZ GRB2 ACTC1 MAPRE2 ITGA2B PPP3R1 PDLIM1 SYPL1 GSN TLN1 PUF60"
0.0979769839608785	4	211	545298079321527	Regulation of actin cytoskeleton	http://www.genome.jp/kegg-bin/show_pathway?bta04810	ITGA2B MYL9 PPP1R12A GSN	0.0979769839608785,4,211,5.45298079321527,"Regulation of actin cytoskeleton","http://www.genome.jp/kegg-bin/show_pathway?bta04810 "," ITGA2B MYL9 PPP1R12A GSN"
0.0983933856050723	13	1732	215899629269479	Regulation of catalytic activity	http://amigo.geneontology.org/amigo/term/GO:0050790	ADAP2 MAPRE2 PDCD5 PLEK RAB3GAP1 PRKAR2A PPP1R12A EEF1D CCT2 RASA3 ARRB1 SERPINB2 OAS1Z	0.0983933856050723,13,1732,2.15899629269479,"Regulation of catalytic activity "," http://amigo.geneontology.org/amigo/term/GO:0050790"," ADAP2 MAPRE2 PDCD5 PLEK RAB3GAP1 PRKAR2A PPP1R12A EEF1D CCT2 RASA3 ARRB1 SERPINB2 OAS1Z"
0.0983933856050723	6	478	36106033913235	Anchoring junction	http://amigo.geneontology.org/amigo/term/GO:0070161	GRB2 MAPRE2 ITGA2B PDLIM1 GSN TLN1	0.0983933856050723,6,478,3.6106033913235,"Anchoring junction "," http://amigo.geneontology.org/amigo/term/GO:0070161"," GRB2 MAPRE2 ITGA2B PDLIM1 GSN TLN1"
0.0985185960945757	3	109	791682761950748	WP1023 mRNA Processing	http://www.wikipathways.org/instance/WP1023_r95764	U2AF1 SNRNP40 PRPF40A	0.0985185960945757,3,109,7.91682761950748,"WP1023 mRNA Processing","http://www.wikipathways.org/instance/WP1023_r95764"," U2AF1 SNRNP40 PRPF40A"
0.0985185960945757	10	1154	249258870747058	Regulation of intracellular signal transduction	http://amigo.geneontology.org/amigo/term/GO:1902531	GRB2 CPNE1 MAPRE2 SEH1L VWF ENO1 OPA1 RASA3 ARRB1 F2RL3	0.0985185960945757,10,1154,2.49258870747058,"Regulation of intracellular signal transduction "," http://amigo.geneontology.org/amigo/term/GO:1902531"," GRB2 CPNE1 MAPRE2 SEH1L VWF ENO1 OPA1 RASA3 ARRB1 F2RL3"
0.0985185960945757	6	480	359555921052632	Membrane Trafficking	https://reactome.org/download/current	GRB2 RAB27A RAB3GAP1 TFG ARRB1 TUBA4A	0.0985185960945757,6,480,3.59555921052632,"Membrane Trafficking","https://reactome.org/download/current"," GRB2 RAB27A RAB3GAP1 TFG ARRB1 TUBA4A"
0.102779455073889	4	216	532675438596491	Processing of Capped Intron-Containing Pre-mRNA	https://reactome.org/download/current	SEH1L U2AF1 PUF60 PRPF40A	0.102779455073889,4,216,5.32675438596491,"Processing of Capped Intron-Containing Pre-mRNA","https://reactome.org/download/current"," SEH1L U2AF1 PUF60 PRPF40A"
0.105008840980029	3	112	770476973684211	Single fertilization	http://amigo.geneontology.org/amigo/term/GO:0007338	ALDOA CD9 CCT2	0.105008840980029,3,112,7.70476973684211,"Single fertilization "," http://amigo.geneontology.org/amigo/term/GO:0007338"," ALDOA CD9 CCT2"
0.107095682518452	2	37	155483641536273	Cooperation of PDCL PhLP1 and TRiC/CCT in G-protein beta folding	https://reactome.org/download/current	CCT6A CCT2	0.107095682518452,2,37,15.5483641536273,"Cooperation of PDCL PhLP1 and TRiC/CCT in G-protein beta folding","https://reactome.org/download/current"," CCT6A CCT2"
0.107095682518452	7	650	309771255060729	Protein localization to organelle	http://amigo.geneontology.org/amigo/term/GO:0033365	PMPCB CCT6A PDCD5 PPP3R1 RAB3GAP1 SGTA CCT2	0.107095682518452,7,650,3.09771255060729,"Protein localization to organelle "," http://amigo.geneontology.org/amigo/term/GO:0033365"," PMPCB CCT6A PDCD5 PPP3R1 RAB3GAP1 SGTA CCT2"
0.107095682518452	2	37	155483641536273	Positive regulation of dephosphorylation	http://amigo.geneontology.org/amigo/term/GO:0035306	PLEK PPP1R12A	0.107095682518452,2,37,15.5483641536273,"Positive regulation of dephosphorylation "," http://amigo.geneontology.org/amigo/term/GO:0035306"," PLEK PPP1R12A"
0.107095682518452	2	37	155483641536273	Protein insertion into membrane	http://amigo.geneontology.org/amigo/term/GO:0051205	PDCD5 SGTA	0.107095682518452,2,37,15.5483641536273,"Protein insertion into membrane "," http://amigo.geneontology.org/amigo/term/GO:0051205"," PDCD5 SGTA"
0.107095682518452	2	37	155483641536273	Platelet aggregation	http://amigo.geneontology.org/amigo/term/GO:0070527	PLEK CD9	0.107095682518452,2,37,15.5483641536273,"Platelet aggregation "," http://amigo.geneontology.org/amigo/term/GO:0070527"," PLEK CD9"
0.107095682518452	6	493	350074730436639	Protein kinase binding	http://amigo.geneontology.org/amigo/term/GO:0019901	GRB2 MAPRE2 PLEK PRKAR2A PPP1R12A TUBA4A	0.107095682518452,6,493,3.50074730436639,"Protein kinase binding "," http://amigo.geneontology.org/amigo/term/GO:0019901"," GRB2 MAPRE2 PLEK PRKAR2A PPP1R12A TUBA4A"
0.107783027520514	6	495	34866028708134	Metabolism of RNA	https://reactome.org/download/current	YWHAZ SEH1L U2AF1 HSPA1A PUF60 PRPF40A	0.107783027520514,6,495,3.4866028708134,"Metabolism of RNA","https://reactome.org/download/current"," YWHAZ SEH1L U2AF1 HSPA1A PUF60 PRPF40A"
0.107783027520514	4	222	51827880512091	Ubiquitin protein ligase binding	http://amigo.geneontology.org/amigo/term/GO:0031625	CACYBP PRKAR2A CCT2 ARRB1	0.107783027520514,4,222,5.1827880512091,"Ubiquitin protein ligase binding "," http://amigo.geneontology.org/amigo/term/GO:0031625"," CACYBP PRKAR2A CCT2 ARRB1"
0.108647459994846	2	38	151391966759003	Chaperonin-mediated protein folding	https://reactome.org/download/current	CCT6A CCT2	0.108647459994846,2,38,15.1391966759003,"Chaperonin-mediated protein folding","https://reactome.org/download/current"," CCT6A CCT2"
0.108647459994846	2	38	151391966759003	Protein folding	https://reactome.org/download/current	CCT6A CCT2	0.108647459994846,2,38,15.1391966759003,"Protein folding","https://reactome.org/download/current"," CCT6A CCT2"
0.108647459994846	2	38	151391966759003	Interleukin-3 Interleukin-5 and GM-CSF signaling	https://reactome.org/download/current	YWHAZ GRB2	0.108647459994846,2,38,15.1391966759003,"Interleukin-3 Interleukin-5 and GM-CSF signaling","https://reactome.org/download/current"," YWHAZ GRB2"
0.108647459994846	5	353	407428805725362	Regulation of GTPase activity	http://amigo.geneontology.org/amigo/term/GO:0043087	ADAP2 MAPRE2 RAB3GAP1 RASA3 ARRB1	0.108647459994846,5,353,4.07428805725362,"Regulation of GTPase activity "," http://amigo.geneontology.org/amigo/term/GO:0043087"," ADAP2 MAPRE2 RAB3GAP1 RASA3 ARRB1"
0.113649104218474	2	39	14751012145749	Release of cytochrome c from mitochondria	http://amigo.geneontology.org/amigo/term/GO:0001836	PDCD5 OPA1	0.113649104218474,2,39,14.751012145749,"Release of cytochrome c from mitochondria "," http://amigo.geneontology.org/amigo/term/GO:0001836"," PDCD5 OPA1"
0.115804617497759	6	506	34108071562305	Vesicle-mediated transport	https://reactome.org/download/current	GRB2 RAB27A RAB3GAP1 TFG ARRB1 TUBA4A	0.115804617497759,6,506,3.4108071562305,"Vesicle-mediated transport","https://reactome.org/download/current"," GRB2 RAB27A RAB3GAP1 TFG ARRB1 TUBA4A"
0.116571187096933	2	41	140314505776637	TP53 Regulates Metabolic Genes	https://reactome.org/download/current	YWHAZ GSR	0.116571187096933,2,41,14.0314505776637,"TP53 Regulates Metabolic Genes","https://reactome.org/download/current"," YWHAZ GSR"
0.116571187096933	2	43	133788249694002	Glucose metabolism	https://reactome.org/download/current	ALDOA ENO1	0.116571187096933,2,43,13.3788249694002,"Glucose metabolism","https://reactome.org/download/current"," ALDOA ENO1"
0.116571187096933	2	42	136973684210526	WP3248 Tryptophan metabolism	http://www.wikipathways.org/instance/WP3248_r97841	OGDH HSD17B10	0.116571187096933,2,42,13.6973684210526,"WP3248 Tryptophan metabolism","http://www.wikipathways.org/instance/WP3248_r97841"," OGDH HSD17B10"
0.116571187096933	1	3	958815789473684	WP3122 Pilocytic astrocytoma	http://www.wikipathways.org/instance/WP3122_r97038	GRB2	0.116571187096933,1,3,95.8815789473684,"WP3122 Pilocytic astrocytoma","http://www.wikipathways.org/instance/WP3122_r97038"," GRB2"
0.116571187096933	2	43	133788249694002	WP1027 Glycolysis and Gluconeogenesis	http://www.wikipathways.org/instance/WP1027_r89816	ALDOA ENO1	0.116571187096933,2,43,13.3788249694002,"WP1027 Glycolysis and Gluconeogenesis","http://www.wikipathways.org/instance/WP1027_r89816"," ALDOA ENO1"
0.116571187096933	4	243	473489278752437	Muscle system process	http://amigo.geneontology.org/amigo/term/GO:0003012	ALDOA KCNMA1 ENO1 GSN	0.116571187096933,4,243,4.73489278752437,"Muscle system process "," http://amigo.geneontology.org/amigo/term/GO:0003012"," ALDOA KCNMA1 ENO1 GSN"
0.116571187096933	1	3	958815789473684	SHC-related events triggered by IGF1R	https://reactome.org/download/current	GRB2	0.116571187096933,1,3,95.8815789473684,"SHC-related events triggered by IGF1R","https://reactome.org/download/current"," GRB2"
0.116571187096933	1	3	958815789473684	Succinyl-CoA metabolic process	http://amigo.geneontology.org/amigo/term/GO:0006104	OGDH	0.116571187096933,1,3,95.8815789473684,"Succinyl-CoA metabolic process "," http://amigo.geneontology.org/amigo/term/GO:0006104"," OGDH"
0.116571187096933	2	40	143822368421053	Binding of sperm to zona pellucida	http://amigo.geneontology.org/amigo/term/GO:0007339	ALDOA CCT2	0.116571187096933,2,40,14.3822368421053,"Binding of sperm to zona pellucida "," http://amigo.geneontology.org/amigo/term/GO:0007339"," ALDOA CCT2"
0.116571187096933	5	374	384551787222066	Nucleotide metabolic process	http://amigo.geneontology.org/amigo/term/GO:0009117	OGDH GART ALDOA ENO1 OPA1	0.116571187096933,5,374,3.84551787222066,"Nucleotide metabolic process "," http://amigo.geneontology.org/amigo/term/GO:0009117"," OGDH GART ALDOA ENO1 OPA1"
0.116571187096933	2	44	130747607655502	Positive regulation of telomere maintenance	http://amigo.geneontology.org/amigo/term/GO:0032206	CCT6A CCT2	0.116571187096933,2,44,13.0747607655502,"Positive regulation of telomere maintenance "," http://amigo.geneontology.org/amigo/term/GO:0032206"," CCT6A CCT2"
0.116571187096933	2	42	136973684210526	Regulation of telomere maintenance via telomerase	http://amigo.geneontology.org/amigo/term/GO:0032210	CCT6A CCT2	0.116571187096933,2,42,13.6973684210526,"Regulation of telomere maintenance via telomerase "," http://amigo.geneontology.org/amigo/term/GO:0032210"," CCT6A CCT2"
0.116571187096933	1	3	958815789473684	Negative regulation of megakaryocyte differentiation	http://amigo.geneontology.org/amigo/term/GO:0045653	GABPA	0.116571187096933,1,3,95.8815789473684,"Negative regulation of megakaryocyte differentiation "," http://amigo.geneontology.org/amigo/term/GO:0045653"," GABPA"
0.116571187096933	1	3	958815789473684	Formaldehyde catabolic process	http://amigo.geneontology.org/amigo/term/GO:0046294	ESD	0.116571187096933,1,3,95.8815789473684,"Formaldehyde catabolic process "," http://amigo.geneontology.org/amigo/term/GO:0046294"," ESD"
0.116571187096933	1	3	958815789473684	Positive regulation of lipoprotein metabolic process	http://amigo.geneontology.org/amigo/term/GO:0050747	RAB3GAP1	0.116571187096933,1,3,95.8815789473684,"Positive regulation of lipoprotein metabolic process "," http://amigo.geneontology.org/amigo/term/GO:0050747"," RAB3GAP1"
0.116571187096933	2	41	140314505776637	Regulation of protein processing	http://amigo.geneontology.org/amigo/term/GO:0070613	ENO1 GSN	0.116571187096933,2,41,14.0314505776637,"Regulation of protein processing "," http://amigo.geneontology.org/amigo/term/GO:0070613"," ENO1 GSN"
0.116571187096933	1	3	958815789473684	Mitochondrial tRNA methylation	http://amigo.geneontology.org/amigo/term/GO:0070901	HSD17B10	0.116571187096933,1,3,95.8815789473684,"Mitochondrial tRNA methylation "," http://amigo.geneontology.org/amigo/term/GO:0070901"," HSD17B10"
0.116571187096933	1	3	958815789473684	Establishment of protein localization to endoplasmic reticulum membrane	http://amigo.geneontology.org/amigo/term/GO:0097051	RAB3GAP1	0.116571187096933,1,3,95.8815789473684,"Establishment of protein localization to endoplasmic reticulum membrane "," http://amigo.geneontology.org/amigo/term/GO:0097051"," RAB3GAP1"
0.116571187096933	1	3	958815789473684	Mitochondrial tRNA 5 -end processing	http://amigo.geneontology.org/amigo/term/GO:0097745	HSD17B10	0.116571187096933,1,3,95.8815789473684,"Mitochondrial tRNA 5 -end processing "," http://amigo.geneontology.org/amigo/term/GO:0097745"," HSD17B10"
0.116571187096933	1	3	958815789473684	Membrane tubulation	http://amigo.geneontology.org/amigo/term/GO:0097749	OPA1	0.116571187096933,1,3,95.8815789473684,"Membrane tubulation "," http://amigo.geneontology.org/amigo/term/GO:0097749"," OPA1"
0.116571187096933	1	3	958815789473684	ENSBTAG00000025088	https://www.innatedb.com	TUBA4A	0.116571187096933,1,3,95.8815789473684,"ENSBTAG00000025088","https://www.innatedb.com"," TUBA4A"
0.116571187096933	1	3	958815789473684	Regulation of focal adhesion disassembly	http://amigo.geneontology.org/amigo/term/GO:0120182	MAPRE2	0.116571187096933,1,3,95.8815789473684,"Regulation of focal adhesion disassembly "," http://amigo.geneontology.org/amigo/term/GO:0120182"," MAPRE2"
0.116571187096933	1	3	958815789473684	Positive regulation of focal adhesion disassembly	http://amigo.geneontology.org/amigo/term/GO:0120183	MAPRE2	0.116571187096933,1,3,95.8815789473684,"Positive regulation of focal adhesion disassembly "," http://amigo.geneontology.org/amigo/term/GO:0120183"," MAPRE2"
0.116571187096933	1	3	958815789473684	Positive regulation of protein lipidation	http://amigo.geneontology.org/amigo/term/GO:1903061	RAB3GAP1	0.116571187096933,1,3,95.8815789473684,"Positive regulation of protein lipidation "," http://amigo.geneontology.org/amigo/term/GO:1903061"," RAB3GAP1"
0.116571187096933	2	43	133788249694002	Regulation of protein maturation	http://amigo.geneontology.org/amigo/term/GO:1903317	ENO1 GSN	0.116571187096933,2,43,13.3788249694002,"Regulation of protein maturation "," http://amigo.geneontology.org/amigo/term/GO:1903317"," ENO1 GSN"
0.116571187096933	1	3	958815789473684	Positive regulation of protein targeting to mitochondrion	http://amigo.geneontology.org/amigo/term/GO:1903955	PDCD5	0.116571187096933,1,3,95.8815789473684,"Positive regulation of protein targeting to mitochondrion "," http://amigo.geneontology.org/amigo/term/GO:1903955"," PDCD5"
0.116571187096933	1	3	958815789473684	Mitochondrial tRNA 3 -end processing	http://amigo.geneontology.org/amigo/term/GO:1990180	HSD17B10	0.116571187096933,1,3,95.8815789473684,"Mitochondrial tRNA 3 -end processing "," http://amigo.geneontology.org/amigo/term/GO:1990180"," HSD17B10"
0.116571187096933	2	42	136973684210526	Nucleoid	http://amigo.geneontology.org/amigo/term/GO:0009295	HADHA HSD17B10	0.116571187096933,2,42,13.6973684210526,"Nucleoid "," http://amigo.geneontology.org/amigo/term/GO:0009295"," HADHA HSD17B10"
0.116571187096933	1	3	958815789473684	Mitochondrial crista	http://amigo.geneontology.org/amigo/term/GO:0030061	OPA1	0.116571187096933,1,3,95.8815789473684,"Mitochondrial crista "," http://amigo.geneontology.org/amigo/term/GO:0030061"," OPA1"
0.116571187096933	1	3	958815789473684	Mitochondrial ribonuclease P complex	http://amigo.geneontology.org/amigo/term/GO:0030678	HSD17B10	0.116571187096933,1,3,95.8815789473684,"Mitochondrial ribonuclease P complex "," http://amigo.geneontology.org/amigo/term/GO:0030678"," HSD17B10"
0.116571187096933	1	3	958815789473684	Weibel-Palade body	http://amigo.geneontology.org/amigo/term/GO:0033093	VWF	0.116571187096933,1,3,95.8815789473684,"Weibel-Palade body "," http://amigo.geneontology.org/amigo/term/GO:0033093"," VWF"
0.116571187096933	2	42	136973684210526	Mitochondrial nucleoid	http://amigo.geneontology.org/amigo/term/GO:0042645	HADHA HSD17B10	0.116571187096933,2,42,13.6973684210526,"Mitochondrial nucleoid "," http://amigo.geneontology.org/amigo/term/GO:0042645"," HADHA HSD17B10"
0.116571187096933	1	3	958815789473684	Fructose-bisphosphate aldolase activity	http://amigo.geneontology.org/amigo/term/GO:0004332	ALDOA	0.116571187096933,1,3,95.8815789473684,"Fructose-bisphosphate aldolase activity "," http://amigo.geneontology.org/amigo/term/GO:0004332"," ALDOA"
0.116571187096933	1	3	958815789473684	Oxoglutarate dehydrogenase (succinyl-transferring) activity	http://amigo.geneontology.org/amigo/term/GO:0004591	OGDH	0.116571187096933,1,3,95.8815789473684,"Oxoglutarate dehydrogenase (succinyl-transferring) activity "," http://amigo.geneontology.org/amigo/term/GO:0004591"," OGDH"
0.116571187096933	5	366	392957290767903	GTPase activator activity	http://amigo.geneontology.org/amigo/term/GO:0005096	ADAP2 RAB3GAP1 EEF1D RASA3 ARRB1	0.116571187096933,5,366,3.92957290767903,"GTPase activator activity "," http://amigo.geneontology.org/amigo/term/GO:0005096"," ADAP2 RAB3GAP1 EEF1D RASA3 ARRB1"
0.116571187096933	3	121	713168769030013	Oxidoreductase activity, acting on the CH-OH group of donors, NAD or NADP as acceptor	http://amigo.geneontology.org/amigo/term/GO:0016616	IDH2 HADHA HSD17B10	0.116571187096933,3,121,7.13168769030013,"Oxidoreductase activity, acting on the CH-OH group of donors, NAD or NADP as acceptor "," http://amigo.geneontology.org/amigo/term/GO:0016616"," IDH2 HADHA HSD17B10"
0.116571187096933	1	3	958815789473684	Cyclo-ligase activity	http://amigo.geneontology.org/amigo/term/GO:0016882	GART	0.116571187096933,1,3,95.8815789473684,"Cyclo-ligase activity "," http://amigo.geneontology.org/amigo/term/GO:0016882"," GART"
0.116571187096933	5	380	378479916897507	GTPase regulator activity	http://amigo.geneontology.org/amigo/term/GO:0030695	ADAP2 RAB3GAP1 EEF1D RASA3 ARRB1	0.116571187096933,5,380,3.78479916897507,"GTPase regulator activity "," http://amigo.geneontology.org/amigo/term/GO:0030695"," ADAP2 RAB3GAP1 EEF1D RASA3 ARRB1"
0.116571187096933	1	3	958815789473684	Angiotensin receptor binding	http://amigo.geneontology.org/amigo/term/GO:0031701	ARRB1	0.116571187096933,1,3,95.8815789473684,"Angiotensin receptor binding "," http://amigo.geneontology.org/amigo/term/GO:0031701"," ARRB1"
0.116571187096933	1	3	958815789473684	Phosphatidylinositol 3-kinase catalytic subunit binding	http://amigo.geneontology.org/amigo/term/GO:0036313	GSN	0.116571187096933,1,3,95.8815789473684,"Phosphatidylinositol 3-kinase catalytic subunit binding "," http://amigo.geneontology.org/amigo/term/GO:0036313"," GSN"
0.116571187096933	4	243	473489278752437	Ubiquitin-like protein ligase binding	http://amigo.geneontology.org/amigo/term/GO:0044389	CACYBP PRKAR2A CCT2 ARRB1	0.116571187096933,4,243,4.73489278752437,"Ubiquitin-like protein ligase binding "," http://amigo.geneontology.org/amigo/term/GO:0044389"," CACYBP PRKAR2A CCT2 ARRB1"
0.116571187096933	1	3	958815789473684	17-beta-hydroxysteroid dehydrogenase (NAD+) activity	http://amigo.geneontology.org/amigo/term/GO:0044594	HSD17B10	0.116571187096933,1,3,95.8815789473684,"17-beta-hydroxysteroid dehydrogenase (NAD+) activity "," http://amigo.geneontology.org/amigo/term/GO:0044594"," HSD17B10"
0.116571187096933	5	380	378479916897507	Nucleoside-triphosphatase regulator activity	http://amigo.geneontology.org/amigo/term/GO:0060589	ADAP2 RAB3GAP1 EEF1D RASA3 ARRB1	0.116571187096933,5,380,3.78479916897507,"Nucleoside-triphosphatase regulator activity "," http://amigo.geneontology.org/amigo/term/GO:0060589"," ADAP2 RAB3GAP1 EEF1D RASA3 ARRB1"
0.116571187096933	5	363	396204871683341	Amyotrophic lateral sclerosis	http://www.genome.jp/kegg-bin/show_pathway?bta05014	PSMB3 MCU PPP3R1 SEH1L TUBA4A	0.116571187096933,5,363,3.96204871683341,"Amyotrophic lateral sclerosis","http://www.genome.jp/kegg-bin/show_pathway?bta05014 "," PSMB3 MCU PPP3R1 SEH1L TUBA4A"
0.116571187096933	1	3	958815789473684	ENSBTAG00000017512	https://www.innatedb.com	YWHAZ	0.116571187096933,1,3,95.8815789473684,"ENSBTAG00000017512","https://www.innatedb.com"," YWHAZ"
0.116571187096933	1	3	958815789473684	ENSBTAG00000047116	https://www.innatedb.com	TUBA4A	0.116571187096933,1,3,95.8815789473684,"ENSBTAG00000047116","https://www.innatedb.com"," TUBA4A"
0.116571187096933	1	3	958815789473684	P00058 mRNA splicing	ftp://ftp.pantherdb.org/pathway/current_release	SNRNP40	0.116571187096933,1,3,95.8815789473684,"P00058 mRNA splicing","ftp://ftp.pantherdb.org/pathway/current_release"," SNRNP40"
0.116571187096933	1	3	958815789473684	P02744 Fructose galactose metabolism	ftp://ftp.pantherdb.org/pathway/current_release	ALDOA	0.116571187096933,1,3,95.8815789473684,"P02744 Fructose galactose metabolism","ftp://ftp.pantherdb.org/pathway/current_release"," ALDOA"
0.117290836841102	3	130	663795546558704	Oxidoreductase activity, acting on CH-OH group of donors	http://amigo.geneontology.org/amigo/term/GO:0016614	IDH2 HADHA HSD17B10	0.117290836841102,3,130,6.63795546558704,"Oxidoreductase activity, acting on CH-OH group of donors "," http://amigo.geneontology.org/amigo/term/GO:0016614"," IDH2 HADHA HSD17B10"
0.118778774490838	3	131	65872840498192	WP1043 Calcium Regulation in the Cardiac Cell	http://www.wikipathways.org/instance/WP1043_r95757	YWHAZ PRKAR2A ARRB1	0.118778774490838,3,131,6.5872840498192,"WP1043 Calcium Regulation in the Cardiac Cell","http://www.wikipathways.org/instance/WP1043_r95757"," YWHAZ PRKAR2A ARRB1"
0.118778774490838	2	45	127842105263158	Phosphatidylserine binding	http://amigo.geneontology.org/amigo/term/GO:0001786	CPNE1 TLN1	0.118778774490838,2,45,12.7842105263158,"Phosphatidylserine binding "," http://amigo.geneontology.org/amigo/term/GO:0001786"," CPNE1 TLN1"
0.120255215085757	2	49	117406015037594	Intraflagellar transport	https://reactome.org/download/current	DYNLRB1 TUBA4A	0.120255215085757,2,49,11.7406015037594,"Intraflagellar transport","https://reactome.org/download/current"," DYNLRB1 TUBA4A"
0.120255215085757	2	47	122402015677492	Signaling by the B Cell Receptor BCR	https://reactome.org/download/current	GRB2 PPP3R1	0.120255215085757,2,47,12.2402015677492,"Signaling by the B Cell Receptor BCR","https://reactome.org/download/current"," GRB2 PPP3R1"
0.120255215085757	1	4	719111842105263	Mitochondrial RNA 5 -end processing	http://amigo.geneontology.org/amigo/term/GO:0000964	HSD17B10	0.120255215085757,1,4,71.9111842105263,"Mitochondrial RNA 5 -end processing "," http://amigo.geneontology.org/amigo/term/GO:0000964"," HSD17B10"
0.120255215085757	1	4	719111842105263	SOS-mediated signalling	https://reactome.org/download/current	GRB2	0.120255215085757,1,4,71.9111842105263,"SOS-mediated signalling","https://reactome.org/download/current"," GRB2"
0.120255215085757	1	4	719111842105263	Isoleucine catabolic process	http://amigo.geneontology.org/amigo/term/GO:0006550	HSD17B10	0.120255215085757,1,4,71.9111842105263,"Isoleucine catabolic process "," http://amigo.geneontology.org/amigo/term/GO:0006550"," HSD17B10"
0.120255215085757	5	385	373564593301435	Nucleoside phosphate metabolic process	http://amigo.geneontology.org/amigo/term/GO:0006753	OGDH GART ALDOA ENO1 OPA1	0.120255215085757,5,385,3.73564593301435,"Nucleoside phosphate metabolic process "," http://amigo.geneontology.org/amigo/term/GO:0006753"," OGDH GART ALDOA ENO1 OPA1"
0.120255215085757	2	48	119851973684211	ATP biosynthetic process	http://amigo.geneontology.org/amigo/term/GO:0006754	ALDOA ENO1	0.120255215085757,2,48,11.9851973684211,"ATP biosynthetic process "," http://amigo.geneontology.org/amigo/term/GO:0006754"," ALDOA ENO1"
0.120255215085757	5	392	366893796992481	Mitochondrion organization	http://amigo.geneontology.org/amigo/term/GO:0007005	MCU PMPCB PDCD5 HSD17B10 OPA1	0.120255215085757,5,392,3.66893796992481,"Mitochondrion organization "," http://amigo.geneontology.org/amigo/term/GO:0007005"," MCU PMPCB PDCD5 HSD17B10 OPA1"
0.120255215085757	1	4	719111842105263	Outer mitochondrial membrane organization	http://amigo.geneontology.org/amigo/term/GO:0007008	PDCD5	0.120255215085757,1,4,71.9111842105263,"Outer mitochondrial membrane organization "," http://amigo.geneontology.org/amigo/term/GO:0007008"," PDCD5"
0.120255215085757	4	264	435825358851675	Ras protein signal transduction	http://amigo.geneontology.org/amigo/term/GO:0007265	MAPRE2 RASA3 ARRB1 F2RL3	0.120255215085757,4,264,4.35825358851675,"Ras protein signal transduction "," http://amigo.geneontology.org/amigo/term/GO:0007265"," MAPRE2 RASA3 ARRB1 F2RL3"
0.120255215085757	3	135	639210526315789	Purine ribonucleotide biosynthetic process	http://amigo.geneontology.org/amigo/term/GO:0009152	GART ALDOA ENO1	0.120255215085757,3,135,6.39210526315789,"Purine ribonucleotide biosynthetic process "," http://amigo.geneontology.org/amigo/term/GO:0009152"," GART ALDOA ENO1"
0.120255215085757	3	144	599259868421053	Fertilization	http://amigo.geneontology.org/amigo/term/GO:0009566	ALDOA CD9 CCT2	0.120255215085757,3,144,5.99259868421053,"Fertilization "," http://amigo.geneontology.org/amigo/term/GO:0009566"," ALDOA CD9 CCT2"
0.120255215085757	1	4	719111842105263	Positive regulation of platelet activation	http://amigo.geneontology.org/amigo/term/GO:0010572	PLEK	0.120255215085757,1,4,71.9111842105263,"Positive regulation of platelet activation "," http://amigo.geneontology.org/amigo/term/GO:0010572"," PLEK"
0.120255215085757	1	4	719111842105263	Bradykinin catabolic process	http://amigo.geneontology.org/amigo/term/GO:0010815	XPNPEP1	0.120255215085757,1,4,71.9111842105263,"Bradykinin catabolic process "," http://amigo.geneontology.org/amigo/term/GO:0010815"," XPNPEP1"
0.120255215085757	2	48	119851973684211	Positive regulation of mitochondrion organization	http://amigo.geneontology.org/amigo/term/GO:0010822	MCU PDCD5	0.120255215085757,2,48,11.9851973684211,"Positive regulation of mitochondrion organization "," http://amigo.geneontology.org/amigo/term/GO:0010822"," MCU PDCD5"
0.120255215085757	1	4	719111842105263	Protein succinylation	http://amigo.geneontology.org/amigo/term/GO:0018335	OGDH	0.120255215085757,1,4,71.9111842105263,"Protein succinylation "," http://amigo.geneontology.org/amigo/term/GO:0018335"," OGDH"
0.120255215085757	2	50	115057894736842	Diencephalon development	http://amigo.geneontology.org/amigo/term/GO:0021536	OGDH RAB3GAP1	0.120255215085757,2,50,11.5057894736842,"Diencephalon development "," http://amigo.geneontology.org/amigo/term/GO:0021536"," OGDH RAB3GAP1"
0.120255215085757	2	50	115057894736842	Actin filament depolymerization	http://amigo.geneontology.org/amigo/term/GO:0030042	PLEK GSN	0.120255215085757,2,50,11.5057894736842,"Actin filament depolymerization "," http://amigo.geneontology.org/amigo/term/GO:0030042"," PLEK GSN"
0.120255215085757	3	144	599259868421053	Respiratory tube development	http://amigo.geneontology.org/amigo/term/GO:0030323	YWHAZ PPP3R1 SIM2	0.120255215085757,3,144,5.99259868421053,"Respiratory tube development "," http://amigo.geneontology.org/amigo/term/GO:0030323"," YWHAZ PPP3R1 SIM2"
0.120255215085757	3	142	607700148257969	Lung development	http://amigo.geneontology.org/amigo/term/GO:0030324	YWHAZ PPP3R1 SIM2	0.120255215085757,3,142,6.07700148257969,"Lung development "," http://amigo.geneontology.org/amigo/term/GO:0030324"," YWHAZ PPP3R1 SIM2"
0.120255215085757	2	46	125062929061785	Regulation of actin filament depolymerization	http://amigo.geneontology.org/amigo/term/GO:0030834	PLEK GSN	0.120255215085757,2,46,12.5062929061785,"Regulation of actin filament depolymerization "," http://amigo.geneontology.org/amigo/term/GO:0030834"," PLEK GSN"
0.120255215085757	1	4	719111842105263	Paranodal junction assembly	http://amigo.geneontology.org/amigo/term/GO:0030913	CD9	0.120255215085757,1,4,71.9111842105263,"Paranodal junction assembly "," http://amigo.geneontology.org/amigo/term/GO:0030913"," CD9"
0.120255215085757	2	49	117406015037594	Homotypic cell-cell adhesion	http://amigo.geneontology.org/amigo/term/GO:0034109	PLEK CD9	0.120255215085757,2,49,11.7406015037594,"Homotypic cell-cell adhesion "," http://amigo.geneontology.org/amigo/term/GO:0034109"," PLEK CD9"
0.120255215085757	1	4	719111842105263	Cardiolipin acyl-chain remodeling	http://amigo.geneontology.org/amigo/term/GO:0035965	HADHA	0.120255215085757,1,4,71.9111842105263,"Cardiolipin acyl-chain remodeling "," http://amigo.geneontology.org/amigo/term/GO:0035965"," HADHA"
0.120255215085757	4	253	4547742874974	Small molecule catabolic process	http://amigo.geneontology.org/amigo/term/GO:0044282	ESD ENO1 HADHA HSD17B10	0.120255215085757,4,253,4.547742874974,"Small molecule catabolic process "," http://amigo.geneontology.org/amigo/term/GO:0044282"," ESD ENO1 HADHA HSD17B10"
0.120255215085757	1	4	719111842105263	Protein insertion into mitochondrial outer membrane	http://amigo.geneontology.org/amigo/term/GO:0045040	PDCD5	0.120255215085757,1,4,71.9111842105263,"Protein insertion into mitochondrial outer membrane "," http://amigo.geneontology.org/amigo/term/GO:0045040"," PDCD5"
0.120255215085757	1	4	719111842105263	Negative regulation of cell volume	http://amigo.geneontology.org/amigo/term/GO:0045794	KCNMA1	0.120255215085757,1,4,71.9111842105263,"Negative regulation of cell volume "," http://amigo.geneontology.org/amigo/term/GO:0045794"," KCNMA1"
0.120255215085757	4	254	452983837546622	Positive regulation of proteolysis	http://amigo.geneontology.org/amigo/term/GO:0045862	PDCD5 ENO1 SGTA GSN	0.120255215085757,4,254,4.52983837546622,"Positive regulation of proteolysis "," http://amigo.geneontology.org/amigo/term/GO:0045862"," PDCD5 ENO1 SGTA GSN"
0.120255215085757	1	4	719111842105263	Formaldehyde metabolic process	http://amigo.geneontology.org/amigo/term/GO:0046292	ESD	0.120255215085757,1,4,71.9111842105263,"Formaldehyde metabolic process "," http://amigo.geneontology.org/amigo/term/GO:0046292"," ESD"
0.120255215085757	3	132	653738038277512	Protein stabilization	http://amigo.geneontology.org/amigo/term/GO:0050821	CCT6A PPIB CCT2	0.120255215085757,3,132,6.53738038277512,"Protein stabilization "," http://amigo.geneontology.org/amigo/term/GO:0050821"," CCT6A PPIB CCT2"
0.120255215085757	1	4	719111842105263	Histone succinylation	http://amigo.geneontology.org/amigo/term/GO:0106077	OGDH	0.120255215085757,1,4,71.9111842105263,"Histone succinylation "," http://amigo.geneontology.org/amigo/term/GO:0106077"," OGDH"
0.120255215085757	1	4	719111842105263	Cell-substrate junction disassembly	http://amigo.geneontology.org/amigo/term/GO:0120180	MAPRE2	0.120255215085757,1,4,71.9111842105263,"Cell-substrate junction disassembly "," http://amigo.geneontology.org/amigo/term/GO:0120180"," MAPRE2"
0.120255215085757	1	4	719111842105263	Focal adhesion disassembly	http://amigo.geneontology.org/amigo/term/GO:0120181	MAPRE2	0.120255215085757,1,4,71.9111842105263,"Focal adhesion disassembly "," http://amigo.geneontology.org/amigo/term/GO:0120181"," MAPRE2"
0.120255215085757	1	4	719111842105263	Negative regulation of ER-associated ubiquitin-dependent protein catabolic process	http://amigo.geneontology.org/amigo/term/GO:1903070	SGTA	0.120255215085757,1,4,71.9111842105263,"Negative regulation of ER-associated ubiquitin-dependent protein catabolic process "," http://amigo.geneontology.org/amigo/term/GO:1903070"," SGTA"
0.120255215085757	1	4	719111842105263	Regulation of hypoxia-induced intrinsic apoptotic signaling pathway	http://amigo.geneontology.org/amigo/term/GO:1903297	ENO1	0.120255215085757,1,4,71.9111842105263,"Regulation of hypoxia-induced intrinsic apoptotic signaling pathway "," http://amigo.geneontology.org/amigo/term/GO:1903297"," ENO1"
0.120255215085757	1	4	719111842105263	Negative regulation of hypoxia-induced intrinsic apoptotic signaling pathway	http://amigo.geneontology.org/amigo/term/GO:1903298	ENO1	0.120255215085757,1,4,71.9111842105263,"Negative regulation of hypoxia-induced intrinsic apoptotic signaling pathway "," http://amigo.geneontology.org/amigo/term/GO:1903298"," ENO1"
0.120255215085757	1	4	719111842105263	Regulation of protein folding	http://amigo.geneontology.org/amigo/term/GO:1903332	PDCD5	0.120255215085757,1,4,71.9111842105263,"Regulation of protein folding "," http://amigo.geneontology.org/amigo/term/GO:1903332"," PDCD5"
0.120255215085757	1	4	719111842105263	Positive regulation of endoplasmic reticulum tubular network organization	http://amigo.geneontology.org/amigo/term/GO:1903373	RAB3GAP1	0.120255215085757,1,4,71.9111842105263,"Positive regulation of endoplasmic reticulum tubular network organization "," http://amigo.geneontology.org/amigo/term/GO:1903373"," RAB3GAP1"
0.120255215085757	1	4	719111842105263	Regulation of chaperone-mediated protein folding	http://amigo.geneontology.org/amigo/term/GO:1903644	PDCD5	0.120255215085757,1,4,71.9111842105263,"Regulation of chaperone-mediated protein folding "," http://amigo.geneontology.org/amigo/term/GO:1903644"," PDCD5"
0.120255215085757	1	4	719111842105263	Positive regulation of establishment of protein localization to mitochondrion	http://amigo.geneontology.org/amigo/term/GO:1903749	PDCD5	0.120255215085757,1,4,71.9111842105263,"Positive regulation of establishment of protein localization to mitochondrion "," http://amigo.geneontology.org/amigo/term/GO:1903749"," PDCD5"
0.120255215085757	2	47	122402015677492	Regulation of telomere maintenance via telomere lengthening	http://amigo.geneontology.org/amigo/term/GO:1904356	CCT6A CCT2	0.120255215085757,2,47,12.2402015677492,"Regulation of telomere maintenance via telomere lengthening "," http://amigo.geneontology.org/amigo/term/GO:1904356"," CCT6A CCT2"
0.120255215085757	1	4	719111842105263	Positive regulation of telomerase RNA localization to Cajal body	http://amigo.geneontology.org/amigo/term/GO:1904874	CCT2	0.120255215085757,1,4,71.9111842105263,"Positive regulation of telomerase RNA localization to Cajal body "," http://amigo.geneontology.org/amigo/term/GO:1904874"," CCT2"
0.120255215085757	2	50	115057894736842	Positive regulation of DNA biosynthetic process	http://amigo.geneontology.org/amigo/term/GO:2000573	CCT6A CCT2	0.120255215085757,2,50,11.5057894736842,"Positive regulation of DNA biosynthetic process "," http://amigo.geneontology.org/amigo/term/GO:2000573"," CCT6A CCT2"
0.120255215085757	1	4	719111842105263	Phosphopyruvate hydratase complex	http://amigo.geneontology.org/amigo/term/GO:0000015	ENO1	0.120255215085757,1,4,71.9111842105263,"Phosphopyruvate hydratase complex "," http://amigo.geneontology.org/amigo/term/GO:0000015"," ENO1"
0.120255215085757	2	48	119851973684211	Stress fiber	http://amigo.geneontology.org/amigo/term/GO:0001725	PDLIM1 MYL9	0.120255215085757,2,48,11.9851973684211,"Stress fiber "," http://amigo.geneontology.org/amigo/term/GO:0001725"," PDLIM1 MYL9"
0.120255215085757	1	4	719111842105263	Eukaryotic translation elongation factor 1 complex	http://amigo.geneontology.org/amigo/term/GO:0005853	EEF1D	0.120255215085757,1,4,71.9111842105263,"Eukaryotic translation elongation factor 1 complex "," http://amigo.geneontology.org/amigo/term/GO:0005853"," EEF1D"
0.120255215085757	2	46	125062929061785	Protein serine/threonine phosphatase complex	http://amigo.geneontology.org/amigo/term/GO:0008287	PPP3R1 PPP1R12A	0.120255215085757,2,46,12.5062929061785,"Protein serine/threonine phosphatase complex "," http://amigo.geneontology.org/amigo/term/GO:0008287"," PPP3R1 PPP1R12A"
0.120255215085757	1	4	719111842105263	Nucleotide-activated protein kinase complex	http://amigo.geneontology.org/amigo/term/GO:0031588	PRKAR2A	0.120255215085757,1,4,71.9111842105263,"Nucleotide-activated protein kinase complex "," http://amigo.geneontology.org/amigo/term/GO:0031588"," PRKAR2A"
0.120255215085757	1	4	719111842105263	U2AF complex	http://amigo.geneontology.org/amigo/term/GO:0089701	U2AF1	0.120255215085757,1,4,71.9111842105263,"U2AF complex "," http://amigo.geneontology.org/amigo/term/GO:0089701"," U2AF1"
0.120255215085757	2	48	119851973684211	Contractile actin filament bundle	http://amigo.geneontology.org/amigo/term/GO:0097517	PDLIM1 MYL9	0.120255215085757,2,48,11.9851973684211,"Contractile actin filament bundle "," http://amigo.geneontology.org/amigo/term/GO:0097517"," PDLIM1 MYL9"
0.120255215085757	4	266	432548476454294	Mitochondrial protein-containing complex	http://amigo.geneontology.org/amigo/term/GO:0098798	MCU PMPCB HADHA HSD17B10	0.120255215085757,4,266,4.32548476454294,"Mitochondrial protein-containing complex "," http://amigo.geneontology.org/amigo/term/GO:0098798"," MCU PMPCB HADHA HSD17B10"
0.120255215085757	10	1256	229016510224606	Catalytic complex	http://amigo.geneontology.org/amigo/term/GO:1902494	CACYBP PSMB3 OGDH DYNLRB1 PPP3R1 ENO1 PRKAR2A PPP1R12A SNRNP40 HSD17B10	0.120255215085757,10,1256,2.29016510224606,"Catalytic complex "," http://amigo.geneontology.org/amigo/term/GO:1902494"," CACYBP PSMB3 OGDH DYNLRB1 PPP3R1 ENO1 PRKAR2A PPP1R12A SNRNP40 HSD17B10"
0.120255215085757	2	46	125062929061785	Phosphatase complex	http://amigo.geneontology.org/amigo/term/GO:1903293	PPP3R1 PPP1R12A	0.120255215085757,2,46,12.5062929061785,"Phosphatase complex "," http://amigo.geneontology.org/amigo/term/GO:1903293"," PPP3R1 PPP1R12A"
0.120255215085757	1	4	719111842105263	Phosphopyruvate hydratase activity	http://amigo.geneontology.org/amigo/term/GO:0004634	ENO1	0.120255215085757,1,4,71.9111842105263,"Phosphopyruvate hydratase activity "," http://amigo.geneontology.org/amigo/term/GO:0004634"," ENO1"
0.120255215085757	2	49	117406015037594	Structural constituent of cytoskeleton	http://amigo.geneontology.org/amigo/term/GO:0005200	TLN1 TUBA4A	0.120255215085757,2,49,11.7406015037594,"Structural constituent of cytoskeleton "," http://amigo.geneontology.org/amigo/term/GO:0005200"," TLN1 TUBA4A"
0.120255215085757	5	404	355995961438249	Ion channel activity	http://amigo.geneontology.org/amigo/term/GO:0005216	MCU KCNA10 NOX5 KCNMA1 CLIC1	0.120255215085757,5,404,3.55995961438249,"Ion channel activity "," http://amigo.geneontology.org/amigo/term/GO:0005216"," MCU KCNA10 NOX5 KCNMA1 CLIC1"
0.120255215085757	1	4	719111842105263	Acetyltransferase activator activity	http://amigo.geneontology.org/amigo/term/GO:0010698	PDCD5	0.120255215085757,1,4,71.9111842105263,"Acetyltransferase activator activity "," http://amigo.geneontology.org/amigo/term/GO:0010698"," PDCD5"
0.120255215085757	1	4	719111842105263	Glutathione disulfide oxidoreductase activity	http://amigo.geneontology.org/amigo/term/GO:0015038	GSR	0.120255215085757,1,4,71.9111842105263,"Glutathione disulfide oxidoreductase activity "," http://amigo.geneontology.org/amigo/term/GO:0015038"," GSR"
0.120255215085757	1	4	719111842105263	Thrombin-activated receptor activity	http://amigo.geneontology.org/amigo/term/GO:0015057	F2RL3	0.120255215085757,1,4,71.9111842105263,"Thrombin-activated receptor activity "," http://amigo.geneontology.org/amigo/term/GO:0015057"," F2RL3"
0.120255215085757	2	50	115057894736842	Myosin binding	http://amigo.geneontology.org/amigo/term/GO:0017022	ACTC1 MYL9	0.120255215085757,2,50,11.5057894736842,"Myosin binding "," http://amigo.geneontology.org/amigo/term/GO:0017022"," ACTC1 MYL9"
0.120255215085757	1	4	719111842105263	Testosterone dehydrogenase (NAD+) activity	http://amigo.geneontology.org/amigo/term/GO:0047035	HSD17B10	0.120255215085757,1,4,71.9111842105263,"Testosterone dehydrogenase (NAD+) activity "," http://amigo.geneontology.org/amigo/term/GO:0047035"," HSD17B10"
0.120255215085757	2	49	117406015037594	NAD binding	http://amigo.geneontology.org/amigo/term/GO:0051287	IDH2 HADHA	0.120255215085757,2,49,11.7406015037594,"NAD binding "," http://amigo.geneontology.org/amigo/term/GO:0051287"," IDH2 HADHA"
0.120255215085757	1	4	719111842105263	WD40-repeat domain binding	http://amigo.geneontology.org/amigo/term/GO:0071987	CCT6A	0.120255215085757,1,4,71.9111842105263,"WD40-repeat domain binding "," http://amigo.geneontology.org/amigo/term/GO:0071987"," CCT6A"
0.120255215085757	1	4	719111842105263	BAT3 complex binding	http://amigo.geneontology.org/amigo/term/GO:1904288	SGTA	0.120255215085757,1,4,71.9111842105263,"BAT3 complex binding "," http://amigo.geneontology.org/amigo/term/GO:1904288"," SGTA"
0.120255215085757	2	48	119851973684211	Valine, leucine and isoleucine degradation	http://www.genome.jp/kegg-bin/show_pathway?bta00280	HADHA HSD17B10	0.120255215085757,2,48,11.9851973684211,"Valine, leucine and isoleucine degradation","http://www.genome.jp/kegg-bin/show_pathway?bta00280 "," HADHA HSD17B10"
0.120255215085757	5	386	372596809380965	Alzheimer disease	http://www.genome.jp/kegg-bin/show_pathway?bta05010	PSMB3 MCU PPP3R1 HSD17B10 TUBA4A	0.120255215085757,5,386,3.72596809380965,"Alzheimer disease","http://www.genome.jp/kegg-bin/show_pathway?bta05010 "," PSMB3 MCU PPP3R1 HSD17B10 TUBA4A"
0.120255215085757	3	142	607700148257969	Spinocerebellar ataxia	http://www.genome.jp/kegg-bin/show_pathway?bta05017	PSMB3 MCU OPA1	0.120255215085757,3,142,6.07700148257969,"Spinocerebellar ataxia","http://www.genome.jp/kegg-bin/show_pathway?bta05017 "," PSMB3 MCU OPA1"
0.120255215085757	1	4	719111842105263	P00024 Glycolysis	ftp://ftp.pantherdb.org/pathway/current_release	ALDOA	0.120255215085757,1,4,71.9111842105263,"P00024 Glycolysis","ftp://ftp.pantherdb.org/pathway/current_release"," ALDOA"
0.121759346057912	2	52	110632591093117	Telomere maintenance via telomerase	http://amigo.geneontology.org/amigo/term/GO:0007004	CCT6A CCT2	0.121759346057912,2,52,11.0632591093117,"Telomere maintenance via telomerase "," http://amigo.geneontology.org/amigo/term/GO:0007004"," CCT6A CCT2"
0.121759346057912	6	568	303850074128984	Membrane organization	http://amigo.geneontology.org/amigo/term/GO:0061024	PDCD5 CD9 SGTA TFG OPA1 GSN	0.121759346057912,6,568,3.03850074128984,"Membrane organization "," http://amigo.geneontology.org/amigo/term/GO:0061024"," PDCD5 CD9 SGTA TFG OPA1 GSN"
0.122403102052354	2	53	108545183714002	Hedgehog 'off' state	https://reactome.org/download/current	PRKAR2A TUBA4A	0.122403102052354,2,53,10.8545183714002,"Hedgehog 'off' state","https://reactome.org/download/current"," PRKAR2A TUBA4A"
0.122403102052354	2	53	108545183714002	Regulation of actin dynamics for phagocytic cup formation	https://reactome.org/download/current	WIPF1 GRB2	0.122403102052354,2,53,10.8545183714002,"Regulation of actin dynamics for phagocytic cup formation","https://reactome.org/download/current"," WIPF1 GRB2"
0.122403102052354	2	53	108545183714002	WP3157 Pathogenic Escherichia coli infection	http://www.wikipathways.org/instance/WP3157_r80723	YWHAZ TUBA4A	0.122403102052354,2,53,10.8545183714002,"WP3157 Pathogenic Escherichia coli infection","http://www.wikipathways.org/instance/WP3157_r80723"," YWHAZ TUBA4A"
0.122403102052354	3	147	58703007518797	Purine nucleotide biosynthetic process	http://amigo.geneontology.org/amigo/term/GO:0006164	GART ALDOA ENO1	0.122403102052354,3,147,5.8703007518797,"Purine nucleotide biosynthetic process "," http://amigo.geneontology.org/amigo/term/GO:0006164"," GART ALDOA ENO1"
0.122403102052354	2	53	108545183714002	Glutathione metabolic process	http://amigo.geneontology.org/amigo/term/GO:0006749	GSR CLIC1	0.122403102052354,2,53,10.8545183714002,"Glutathione metabolic process "," http://amigo.geneontology.org/amigo/term/GO:0006749"," GSR CLIC1"
0.122403102052354	3	146	591050829127614	Ribonucleotide biosynthetic process	http://amigo.geneontology.org/amigo/term/GO:0009260	GART ALDOA ENO1	0.122403102052354,3,146,5.91050829127614,"Ribonucleotide biosynthetic process "," http://amigo.geneontology.org/amigo/term/GO:0009260"," GART ALDOA ENO1"
0.122403102052354	7	742	271362959285005	Organophosphate metabolic process	http://amigo.geneontology.org/amigo/term/GO:0019637	OGDH GART PLEK ALDOA ENO1 HADHA OPA1	0.122403102052354,7,742,2.71362959285005,"Organophosphate metabolic process "," http://amigo.geneontology.org/amigo/term/GO:0019637"," OGDH GART PLEK ALDOA ENO1 HADHA OPA1"
0.122403102052354	2	53	108545183714002	Cortical cytoskeleton organization	http://amigo.geneontology.org/amigo/term/GO:0030865	PLEK TLN1	0.122403102052354,2,53,10.8545183714002,"Cortical cytoskeleton organization "," http://amigo.geneontology.org/amigo/term/GO:0030865"," PLEK TLN1"
0.122403102052354	2	53	108545183714002	Actin filament bundle	http://amigo.geneontology.org/amigo/term/GO:0032432	PDLIM1 MYL9	0.122403102052354,2,53,10.8545183714002,"Actin filament bundle "," http://amigo.geneontology.org/amigo/term/GO:0032432"," PDLIM1 MYL9"
0.122403102052354	2	53	108545183714002	Actomyosin	http://amigo.geneontology.org/amigo/term/GO:0042641	PDLIM1 MYL9	0.122403102052354,2,53,10.8545183714002,"Actomyosin "," http://amigo.geneontology.org/amigo/term/GO:0042641"," PDLIM1 MYL9"
0.128266140859023	3	150	575289473684211	Ribose phosphate biosynthetic process	http://amigo.geneontology.org/amigo/term/GO:0046390	GART ALDOA ENO1	0.128266140859023,3,150,5.75289473684211,"Ribose phosphate biosynthetic process "," http://amigo.geneontology.org/amigo/term/GO:0046390"," GART ALDOA ENO1"
0.128266140859023	3	150	575289473684211	Myeloid leukocyte migration	http://amigo.geneontology.org/amigo/term/GO:0097529	MCU CD9 PPIB	0.128266140859023,3,150,5.75289473684211,"Myeloid leukocyte migration "," http://amigo.geneontology.org/amigo/term/GO:0097529"," MCU CD9 PPIB"
0.128720496761022	1	5	575289473684211	Mitochondrial RNA 3 -end processing	http://amigo.geneontology.org/amigo/term/GO:0000965	HSD17B10	0.128720496761022,1,5,57.5289473684211,"Mitochondrial RNA 3 -end processing "," http://amigo.geneontology.org/amigo/term/GO:0000965"," HSD17B10"
0.128720496761022	1	5	575289473684211	Dynamin family protein polymerization involved in membrane fission	http://amigo.geneontology.org/amigo/term/GO:0003373	OPA1	0.128720496761022,1,5,57.5289473684211,"Dynamin family protein polymerization involved in membrane fission "," http://amigo.geneontology.org/amigo/term/GO:0003373"," OPA1"
0.128720496761022	1	5	575289473684211	Dynamin family protein polymerization involved in mitochondrial fission	http://amigo.geneontology.org/amigo/term/GO:0003374	OPA1	0.128720496761022,1,5,57.5289473684211,"Dynamin family protein polymerization involved in mitochondrial fission "," http://amigo.geneontology.org/amigo/term/GO:0003374"," OPA1"
0.128720496761022	2	56	102730263157895	RNA-dependent DNA biosynthetic process	http://amigo.geneontology.org/amigo/term/GO:0006278	CCT6A CCT2	0.128720496761022,2,56,10.2730263157895,"RNA-dependent DNA biosynthetic process "," http://amigo.geneontology.org/amigo/term/GO:0006278"," CCT6A CCT2"
0.128720496761022	1	5	575289473684211	Acyl chain remodeling of CL	https://reactome.org/download/current	HADHA	0.128720496761022,1,5,57.5289473684211,"Acyl chain remodeling of CL","https://reactome.org/download/current"," HADHA"
0.128720496761022	2	58	991878402903811	Protein targeting to mitochondrion	http://amigo.geneontology.org/amigo/term/GO:0006626	PMPCB PDCD5	0.128720496761022,2,58,9.91878402903811,"Protein targeting to mitochondrion "," http://amigo.geneontology.org/amigo/term/GO:0006626"," PMPCB PDCD5"
0.128720496761022	1	5	575289473684211	Protein processing involved in protein targeting to mitochondrion	http://amigo.geneontology.org/amigo/term/GO:0006627	PMPCB	0.128720496761022,1,5,57.5289473684211,"Protein processing involved in protein targeting to mitochondrion "," http://amigo.geneontology.org/amigo/term/GO:0006627"," PMPCB"
0.128720496761022	2	56	102730263157895	Fatty acid beta-oxidation	http://amigo.geneontology.org/amigo/term/GO:0006635	HADHA HSD17B10	0.128720496761022,2,56,10.2730263157895,"Fatty acid beta-oxidation "," http://amigo.geneontology.org/amigo/term/GO:0006635"," HADHA HSD17B10"
0.128720496761022	1	5	575289473684211	NADH regeneration	http://amigo.geneontology.org/amigo/term/GO:0006735	ENO1	0.128720496761022,1,5,57.5289473684211,"NADH regeneration "," http://amigo.geneontology.org/amigo/term/GO:0006735"," ENO1"
0.128720496761022	5	426	337611193476649	Endocytosis	http://amigo.geneontology.org/amigo/term/GO:0006897	GRB2 PPP3R1 CD9 GSN ARRB1	0.128720496761022,5,426,3.37611193476649,"Endocytosis "," http://amigo.geneontology.org/amigo/term/GO:0006897"," GRB2 PPP3R1 CD9 GSN ARRB1"
0.128720496761022	2	57	100927977839335	Purine nucleoside triphosphate biosynthetic process	http://amigo.geneontology.org/amigo/term/GO:0009145	ALDOA ENO1	0.128720496761022,2,57,10.0927977839335,"Purine nucleoside triphosphate biosynthetic process "," http://amigo.geneontology.org/amigo/term/GO:0009145"," ALDOA ENO1"
0.128720496761022	1	5	575289473684211	PKA activation in glucagon signalling	https://reactome.org/download/current	PRKAR2A	0.128720496761022,1,5,57.5289473684211,"PKA activation in glucagon signalling","https://reactome.org/download/current"," PRKAR2A"
0.128720496761022	1	5	575289473684211	CREB1 phosphorylation through the activation of Adenylate Cyclase	https://reactome.org/download/current	PRKAR2A	0.128720496761022,1,5,57.5289473684211,"CREB1 phosphorylation through the activation of Adenylate Cyclase","https://reactome.org/download/current"," PRKAR2A"
0.128720496761022	2	57	100927977839335	Purine ribonucleoside triphosphate biosynthetic process	http://amigo.geneontology.org/amigo/term/GO:0009206	ALDOA ENO1	0.128720496761022,2,57,10.0927977839335,"Purine ribonucleoside triphosphate biosynthetic process "," http://amigo.geneontology.org/amigo/term/GO:0009206"," ALDOA ENO1"
0.128720496761022	1	5	575289473684211	Positive regulation of plasminogen activation	http://amigo.geneontology.org/amigo/term/GO:0010756	ENO1	0.128720496761022,1,5,57.5289473684211,"Positive regulation of plasminogen activation "," http://amigo.geneontology.org/amigo/term/GO:0010756"," ENO1"
0.128720496761022	1	5	575289473684211	Urinary bladder smooth muscle contraction	http://amigo.geneontology.org/amigo/term/GO:0014832	KCNMA1	0.128720496761022,1,5,57.5289473684211,"Urinary bladder smooth muscle contraction "," http://amigo.geneontology.org/amigo/term/GO:0014832"," KCNMA1"
0.128720496761022	1	5	575289473684211	Skeletal myofibril assembly	http://amigo.geneontology.org/amigo/term/GO:0014866	ACTC1	0.128720496761022,1,5,57.5289473684211,"Skeletal myofibril assembly "," http://amigo.geneontology.org/amigo/term/GO:0014866"," ACTC1"
0.128720496761022	1	5	575289473684211	Myoblast fusion involved in skeletal muscle regeneration	http://amigo.geneontology.org/amigo/term/GO:0014905	CD9	0.128720496761022,1,5,57.5289473684211,"Myoblast fusion involved in skeletal muscle regeneration "," http://amigo.geneontology.org/amigo/term/GO:0014905"," CD9"
0.128720496761022	1	5	575289473684211	Acrosome Reaction and Sperm:Oocyte Membrane Binding	https://reactome.org/download/current	CD9	0.128720496761022,1,5,57.5289473684211,"Acrosome Reaction and Sperm:Oocyte Membrane Binding","https://reactome.org/download/current"," CD9"
0.128720496761022	1	5	575289473684211	Skeletal muscle thin filament assembly	http://amigo.geneontology.org/amigo/term/GO:0030240	ACTC1	0.128720496761022,1,5,57.5289473684211,"Skeletal muscle thin filament assembly "," http://amigo.geneontology.org/amigo/term/GO:0030240"," ACTC1"
0.128720496761022	2	58	991878402903811	Regulation of receptor-mediated endocytosis	http://amigo.geneontology.org/amigo/term/GO:0048259	PPP3R1 ARRB1	0.128720496761022,2,58,9.91878402903811,"Regulation of receptor-mediated endocytosis "," http://amigo.geneontology.org/amigo/term/GO:0048259"," PPP3R1 ARRB1"
0.128720496761022	11	1531	20666832823404	Establishment of localization in cell	http://amigo.geneontology.org/amigo/term/GO:0051649	YWHAZ PMPCB NOX5 PDCD5 PLEK PPP3R1 SEH1L RAB27A PPP1R12A TFG F2RL3	0.128720496761022,11,1531,2.0666832823404,"Establishment of localization in cell "," http://amigo.geneontology.org/amigo/term/GO:0051649"," YWHAZ PMPCB NOX5 PDCD5 PLEK PPP3R1 SEH1L RAB27A PPP1R12A TFG F2RL3"
0.128720496761022	1	5	575289473684211	Micturition	http://amigo.geneontology.org/amigo/term/GO:0060073	KCNMA1	0.128720496761022,1,5,57.5289473684211,"Micturition "," http://amigo.geneontology.org/amigo/term/GO:0060073"," KCNMA1"
0.128720496761022	1	5	575289473684211	Canonical glycolysis	http://amigo.geneontology.org/amigo/term/GO:0061621	ENO1	0.128720496761022,1,5,57.5289473684211,"Canonical glycolysis "," http://amigo.geneontology.org/amigo/term/GO:0061621"," ENO1"
0.128720496761022	1	5	575289473684211	Glucose catabolic process to pyruvate	http://amigo.geneontology.org/amigo/term/GO:0061718	ENO1	0.128720496761022,1,5,57.5289473684211,"Glucose catabolic process to pyruvate "," http://amigo.geneontology.org/amigo/term/GO:0061718"," ENO1"
0.128720496761022	3	155	556731748726655	Purine-containing compound biosynthetic process	http://amigo.geneontology.org/amigo/term/GO:0072522	GART ALDOA ENO1	0.128720496761022,3,155,5.56731748726655,"Purine-containing compound biosynthetic process "," http://amigo.geneontology.org/amigo/term/GO:0072522"," GART ALDOA ENO1"
0.128720496761022	1	5	575289473684211	ScaRNA localization to Cajal body	http://amigo.geneontology.org/amigo/term/GO:0090666	CCT2	0.128720496761022,1,5,57.5289473684211,"ScaRNA localization to Cajal body "," http://amigo.geneontology.org/amigo/term/GO:0090666"," CCT2"
0.128720496761022	1	5	575289473684211	Calcineurin complex	http://amigo.geneontology.org/amigo/term/GO:0005955	PPP3R1	0.128720496761022,1,5,57.5289473684211,"Calcineurin complex "," http://amigo.geneontology.org/amigo/term/GO:0005955"," PPP3R1"
0.128720496761022	2	58	991878402903811	Organelle envelope lumen	http://amigo.geneontology.org/amigo/term/GO:0031970	CACYBP OPA1	0.128720496761022,2,58,9.91878402903811,"Organelle envelope lumen "," http://amigo.geneontology.org/amigo/term/GO:0031970"," CACYBP OPA1"
0.128720496761022	1	5	575289473684211	Oxoglutarate dehydrogenase complex	http://amigo.geneontology.org/amigo/term/GO:0045252	OGDH	0.128720496761022,1,5,57.5289473684211,"Oxoglutarate dehydrogenase complex "," http://amigo.geneontology.org/amigo/term/GO:0045252"," OGDH"
0.128720496761022	1	5	575289473684211	2 -5 -oligoadenylate synthetase activity	http://amigo.geneontology.org/amigo/term/GO:0001730	OAS1Z	0.128720496761022,1,5,57.5289473684211,"2 -5 -oligoadenylate synthetase activity "," http://amigo.geneontology.org/amigo/term/GO:0001730"," OAS1Z"
0.128720496761022	1	5	575289473684211	Isocitrate dehydrogenase activity	http://amigo.geneontology.org/amigo/term/GO:0004448	IDH2	0.128720496761022,1,5,57.5289473684211,"Isocitrate dehydrogenase activity "," http://amigo.geneontology.org/amigo/term/GO:0004448"," IDH2"
0.128720496761022	1	5	575289473684211	Neurotrophin TRKA receptor binding	http://amigo.geneontology.org/amigo/term/GO:0005168	GRB2	0.128720496761022,1,5,57.5289473684211,"Neurotrophin TRKA receptor binding "," http://amigo.geneontology.org/amigo/term/GO:0005168"," GRB2"
0.128720496761022	1	5	575289473684211	LIM domain binding	http://amigo.geneontology.org/amigo/term/GO:0030274	TLN1	0.128720496761022,1,5,57.5289473684211,"LIM domain binding "," http://amigo.geneontology.org/amigo/term/GO:0030274"," TLN1"
0.128720496761022	1	5	575289473684211	Fructose binding	http://amigo.geneontology.org/amigo/term/GO:0070061	ALDOA	0.128720496761022,1,5,57.5289473684211,"Fructose binding "," http://amigo.geneontology.org/amigo/term/GO:0070061"," ALDOA"
0.128720496761022	11	1527	207209699100403	Molecular function regulator	http://amigo.geneontology.org/amigo/term/GO:0098772	ADAP2 PDCD5 PPP3R1 RAB27A RAB3GAP1 PRKAR2A PPP1R12A EEF1D RASA3 ARRB1 SERPINB2	0.128720496761022,11,1527,2.07209699100403,"Molecular function regulator "," http://amigo.geneontology.org/amigo/term/GO:0098772"," ADAP2 PDCD5 PPP3R1 RAB27A RAB3GAP1 PRKAR2A PPP1R12A EEF1D RASA3 ARRB1 SERPINB2"
0.128720496761022	2	56	102730263157895	Glutathione metabolism	http://www.genome.jp/kegg-bin/show_pathway?bta00480	GSR IDH2	0.128720496761022,2,56,10.2730263157895,"Glutathione metabolism","http://www.genome.jp/kegg-bin/show_pathway?bta00480 "," GSR IDH2"
0.128720496761022	3	153	564009287925697	MTOR signaling pathway	http://www.genome.jp/kegg-bin/show_pathway?bta04150	GRB2 SEH1L ATP6V1D	0.128720496761022,3,153,5.64009287925697,"MTOR signaling pathway","http://www.genome.jp/kegg-bin/show_pathway?bta04150 "," GRB2 SEH1L ATP6V1D"
0.128720496761022	3	153	564009287925697	Cellular senescence	http://www.genome.jp/kegg-bin/show_pathway?bta04218	MCU PPP3R1 HIPK3	0.128720496761022,3,153,5.64009287925697,"Cellular senescence","http://www.genome.jp/kegg-bin/show_pathway?bta04218 "," MCU PPP3R1 HIPK3"
0.128720496761022	3	155	556731748726655	Hepatitis C	http://www.genome.jp/kegg-bin/show_pathway?bta05160	YWHAZ GRB2 OAS1Z	0.128720496761022,3,155,5.56731748726655,"Hepatitis C","http://www.genome.jp/kegg-bin/show_pathway?bta05160 "," YWHAZ GRB2 OAS1Z"
0.131711023951658	4	287	400898587933248	MAPK signaling pathway	http://www.genome.jp/kegg-bin/show_pathway?bta04010	GRB2 PPP3R1 ARRB1 HSPA1A	0.131711023951658,4,287,4.00898587933248,"MAPK signaling pathway","http://www.genome.jp/kegg-bin/show_pathway?bta04010 "," GRB2 PPP3R1 ARRB1 HSPA1A"
0.131716268019125	6	599	288124945083912	Response to organonitrogen compound	http://amigo.geneontology.org/amigo/term/GO:0010243	GRB2 PPP1R12A CD9 HADHA SGTA GABPA	0.131716268019125,6,599,2.88124945083912,"Response to organonitrogen compound "," http://amigo.geneontology.org/amigo/term/GO:0010243"," GRB2 PPP1R12A CD9 HADHA SGTA GABPA"
0.131716268019125	10	1348	21338630329533	Small molecule metabolic process	http://amigo.geneontology.org/amigo/term/GO:0044281	ESD OGDH GART PLEK ALDOA ENO1 IDH2 HADHA HSD17B10 OPA1	0.131716268019125,10,1348,2.1338630329533,"Small molecule metabolic process "," http://amigo.geneontology.org/amigo/term/GO:0044281"," ESD OGDH GART PLEK ALDOA ENO1 IDH2 HADHA HSD17B10 OPA1"
0.131716268019125	2	59	975066904549509	Glycolysis / Gluconeogenesis	http://www.genome.jp/kegg-bin/show_pathway?bta00010	ALDOA ENO1	0.131716268019125,2,59,9.75066904549509,"Glycolysis / Gluconeogenesis","http://www.genome.jp/kegg-bin/show_pathway?bta00010 "," ALDOA ENO1"
0.131823598598752	3	161	535983981693364	RAF/MAP kinase cascade	https://reactome.org/download/current	GRB2 RASA3 ARRB1	0.131823598598752,3,161,5.35983981693364,"RAF/MAP kinase cascade","https://reactome.org/download/current"," GRB2 RASA3 ARRB1"
0.131823598598752	3	161	535983981693364	MRNA Splicing-Major Pathway	https://reactome.org/download/current	U2AF1 PUF60 PRPF40A	0.131823598598752,3,161,5.35983981693364,"MRNA Splicing-Major Pathway","https://reactome.org/download/current"," U2AF1 PUF60 PRPF40A"
0.131823598598752	3	161	535983981693364	Mitochondrial transport	http://amigo.geneontology.org/amigo/term/GO:0006839	MCU PMPCB PDCD5	0.131823598598752,3,161,5.35983981693364,"Mitochondrial transport "," http://amigo.geneontology.org/amigo/term/GO:0006839"," MCU PMPCB PDCD5"
0.131823598598752	3	161	535983981693364	Regulation of actin polymerization or depolymerization	http://amigo.geneontology.org/amigo/term/GO:0008064	GRB2 PLEK GSN	0.131823598598752,3,161,5.35983981693364,"Regulation of actin polymerization or depolymerization "," http://amigo.geneontology.org/amigo/term/GO:0008064"," GRB2 PLEK GSN"
0.131823598598752	6	604	285739804810038	Cellular homeostasis	http://amigo.geneontology.org/amigo/term/GO:0019725	MCU GSR NOX5 ALDOA KCNMA1 F2RL3	0.131823598598752,6,604,2.85739804810038,"Cellular homeostasis "," http://amigo.geneontology.org/amigo/term/GO:0019725"," MCU GSR NOX5 ALDOA KCNMA1 F2RL3"
0.131823598598752	3	161	535983981693364	Regulation of actin filament length	http://amigo.geneontology.org/amigo/term/GO:0030832	GRB2 PLEK GSN	0.131823598598752,3,161,5.35983981693364,"Regulation of actin filament length "," http://amigo.geneontology.org/amigo/term/GO:0030832"," GRB2 PLEK GSN"
0.131823598598752	3	160	539333881578947	Respiratory system development	http://amigo.geneontology.org/amigo/term/GO:0060541	YWHAZ PPP3R1 SIM2	0.131823598598752,3,160,5.39333881578947,"Respiratory system development "," http://amigo.geneontology.org/amigo/term/GO:0060541"," YWHAZ PPP3R1 SIM2"
0.131823598598752	2	60	958815789473684	Actin-mediated cell contraction	http://amigo.geneontology.org/amigo/term/GO:0070252	ACTC1 GSN	0.131823598598752,2,60,9.58815789473684,"Actin-mediated cell contraction "," http://amigo.geneontology.org/amigo/term/GO:0070252"," ACTC1 GSN"
0.131823598598752	3	161	535983981693364	Positive regulation of supramolecular fiber organization	http://amigo.geneontology.org/amigo/term/GO:1902905	GRB2 PLEK GSN	0.131823598598752,3,161,5.35983981693364,"Positive regulation of supramolecular fiber organization "," http://amigo.geneontology.org/amigo/term/GO:1902905"," GRB2 PLEK GSN"
0.131823598598752	10	1349	213228122195779	Vesicle	http://amigo.geneontology.org/amigo/term/GO:0031982	GRB2 ITGA2B VWF RAB27A ALDOA CLIC1 CD9 SYPL1 GSN ARRB1	0.131823598598752,10,1349,2.13228122195779,"Vesicle "," http://amigo.geneontology.org/amigo/term/GO:0031982"," GRB2 ITGA2B VWF RAB27A ALDOA CLIC1 CD9 SYPL1 GSN ARRB1"
0.131823598598752	5	438	328361571737563	Channel activity	http://amigo.geneontology.org/amigo/term/GO:0015267	MCU KCNA10 NOX5 KCNMA1 CLIC1	0.131823598598752,5,438,3.28361571737563,"Channel activity "," http://amigo.geneontology.org/amigo/term/GO:0015267"," MCU KCNA10 NOX5 KCNMA1 CLIC1"
0.131823598598752	2	60	958815789473684	Hydro-lyase activity	http://amigo.geneontology.org/amigo/term/GO:0016836	ENO1 HADHA	0.131823598598752,2,60,9.58815789473684,"Hydro-lyase activity "," http://amigo.geneontology.org/amigo/term/GO:0016836"," ENO1 HADHA"
0.131823598598752	5	438	328361571737563	Passive transmembrane transporter activity	http://amigo.geneontology.org/amigo/term/GO:0022803	MCU KCNA10 NOX5 KCNMA1 CLIC1	0.131823598598752,5,438,3.28361571737563,"Passive transmembrane transporter activity "," http://amigo.geneontology.org/amigo/term/GO:0022803"," MCU KCNA10 NOX5 KCNMA1 CLIC1"
0.132348447908569	2	63	913157894736842	Regulation of HSF1-mediated heat shock response	https://reactome.org/download/current	SEH1L HSPA1A	0.132348447908569,2,63,9.13157894736842,"Regulation of HSF1-mediated heat shock response","https://reactome.org/download/current"," SEH1L HSPA1A"
0.132348447908569	3	167	516727072171447	MAPK1/MAPK3 signaling	https://reactome.org/download/current	GRB2 RASA3 ARRB1	0.132348447908569,3,167,5.16727072171447,"MAPK1/MAPK3 signaling","https://reactome.org/download/current"," GRB2 RASA3 ARRB1"
0.132348447908569	3	167	516727072171447	MRNA Splicing	https://reactome.org/download/current	U2AF1 PUF60 PRPF40A	0.132348447908569,3,167,5.16727072171447,"MRNA Splicing","https://reactome.org/download/current"," U2AF1 PUF60 PRPF40A"
0.132348447908569	1	6	479407894736842	Activated NTRK2 signals through FRS2 and FRS3	https://reactome.org/download/current	GRB2	0.132348447908569,1,6,47.9407894736842,"Activated NTRK2 signals through FRS2 and FRS3","https://reactome.org/download/current"," GRB2"
0.132348447908569	1	6	479407894736842	de novo IMP biosynthetic process	http://amigo.geneontology.org/amigo/term/GO:0006189	GART	0.132348447908569,1,6,47.9407894736842," de novo IMP biosynthetic process "," http://amigo.geneontology.org/amigo/term/GO:0006189"," GART"
0.132348447908569	1	6	479407894736842	Isoleucine metabolic process	http://amigo.geneontology.org/amigo/term/GO:0006549	HSD17B10	0.132348447908569,1,6,47.9407894736842,"Isoleucine metabolic process "," http://amigo.geneontology.org/amigo/term/GO:0006549"," HSD17B10"
0.132348447908569	2	63	913157894736842	Ribonucleoside triphosphate biosynthetic process	http://amigo.geneontology.org/amigo/term/GO:0009201	ALDOA ENO1	0.132348447908569,2,63,9.13157894736842,"Ribonucleoside triphosphate biosynthetic process "," http://amigo.geneontology.org/amigo/term/GO:0009201"," ALDOA ENO1"
0.132348447908569	2	61	943097497842968	Telomere maintenance via telomere lengthening	http://amigo.geneontology.org/amigo/term/GO:0010833	CCT6A CCT2	0.132348447908569,2,61,9.43097497842968,"Telomere maintenance via telomere lengthening "," http://amigo.geneontology.org/amigo/term/GO:0010833"," CCT6A CCT2"
0.132348447908569	1	6	479407894736842	COPI-independent Golgi-to-ER retrograde traffic	https://reactome.org/download/current	RAB3GAP1	0.132348447908569,1,6,47.9407894736842,"COPI-independent Golgi-to-ER retrograde traffic","https://reactome.org/download/current"," RAB3GAP1"
0.132348447908569	1	6	479407894736842	Pyramidal neuron development	http://amigo.geneontology.org/amigo/term/GO:0021860	OGDH	0.132348447908569,1,6,47.9407894736842,"Pyramidal neuron development "," http://amigo.geneontology.org/amigo/term/GO:0021860"," OGDH"
0.132348447908569	4	298	386100317908866	Regulation of cellular component size	http://amigo.geneontology.org/amigo/term/GO:0032535	GRB2 PLEK KCNMA1 GSN	0.132348447908569,4,298,3.86100317908866,"Regulation of cellular component size "," http://amigo.geneontology.org/amigo/term/GO:0032535"," GRB2 PLEK KCNMA1 GSN"
0.132348447908569	3	164	526179396662388	Response to insulin	http://amigo.geneontology.org/amigo/term/GO:0032868	GRB2 PPP1R12A HADHA	0.132348447908569,3,164,5.26179396662388,"Response to insulin "," http://amigo.geneontology.org/amigo/term/GO:0032868"," GRB2 PPP1R12A HADHA"
0.132348447908569	1	6	479407894736842	Regulation of myosin-light-chain-phosphatase activity	http://amigo.geneontology.org/amigo/term/GO:0035507	PPP1R12A	0.132348447908569,1,6,47.9407894736842,"Regulation of myosin-light-chain-phosphatase activity "," http://amigo.geneontology.org/amigo/term/GO:0035507"," PPP1R12A"
0.132348447908569	9	1161	222980416156671	Positive regulation of molecular function	http://amigo.geneontology.org/amigo/term/GO:0044093	ADAP2 MAPRE2 PDCD5 PLEK RAB3GAP1 PPP1R12A CCT2 RASA3 ARRB1	0.132348447908569,9,1161,2.22980416156671,"Positive regulation of molecular function "," http://amigo.geneontology.org/amigo/term/GO:0044093"," ADAP2 MAPRE2 PDCD5 PLEK RAB3GAP1 PPP1R12A CCT2 RASA3 ARRB1"
0.132348447908569	1	6	479407894736842	Positive regulation by host of viral genome replication	http://amigo.geneontology.org/amigo/term/GO:0044829	PPIB	0.132348447908569,1,6,47.9407894736842,"Positive regulation by host of viral genome replication "," http://amigo.geneontology.org/amigo/term/GO:0044829"," PPIB"
0.132348447908569	5	447	321750264924055	Nucleobase-containing small molecule metabolic process	http://amigo.geneontology.org/amigo/term/GO:0055086	OGDH GART ALDOA ENO1 OPA1	0.132348447908569,5,447,3.21750264924055,"Nucleobase-containing small molecule metabolic process "," http://amigo.geneontology.org/amigo/term/GO:0055086"," OGDH GART ALDOA ENO1 OPA1"
0.132348447908569	1	6	479407894736842	Regulation of ribonuclease activity	http://amigo.geneontology.org/amigo/term/GO:0060700	OAS1Z	0.132348447908569,1,6,47.9407894736842,"Regulation of ribonuclease activity "," http://amigo.geneontology.org/amigo/term/GO:0060700"," OAS1Z"
0.132348447908569	1	6	479407894736842	Glycolytic process through glucose-6-phosphate	http://amigo.geneontology.org/amigo/term/GO:0061620	ENO1	0.132348447908569,1,6,47.9407894736842,"Glycolytic process through glucose-6-phosphate "," http://amigo.geneontology.org/amigo/term/GO:0061620"," ENO1"
0.132348447908569	1	6	479407894736842	Mitochondrial tRNA modification	http://amigo.geneontology.org/amigo/term/GO:0070900	HSD17B10	0.132348447908569,1,6,47.9407894736842,"Mitochondrial tRNA modification "," http://amigo.geneontology.org/amigo/term/GO:0070900"," HSD17B10"
0.132348447908569	3	163	529407491120439	Establishment of protein localization to membrane	http://amigo.geneontology.org/amigo/term/GO:0090150	PDCD5 RAB3GAP1 SGTA	0.132348447908569,3,163,5.29407491120439,"Establishment of protein localization to membrane "," http://amigo.geneontology.org/amigo/term/GO:0090150"," PDCD5 RAB3GAP1 SGTA"
0.132348447908569	1	6	479407894736842	Positive regulation of histone H4 acetylation	http://amigo.geneontology.org/amigo/term/GO:0090240	ARRB1	0.132348447908569,1,6,47.9407894736842,"Positive regulation of histone H4 acetylation "," http://amigo.geneontology.org/amigo/term/GO:0090240"," ARRB1"
0.132348447908569	1	6	479407894736842	Negative regulation of cellular response to hypoxia	http://amigo.geneontology.org/amigo/term/GO:1900038	ENO1	0.132348447908569,1,6,47.9407894736842,"Negative regulation of cellular response to hypoxia "," http://amigo.geneontology.org/amigo/term/GO:1900038"," ENO1"
0.132348447908569	1	6	479407894736842	Mitochondrial RNA modification	http://amigo.geneontology.org/amigo/term/GO:1900864	HSD17B10	0.132348447908569,1,6,47.9407894736842,"Mitochondrial RNA modification "," http://amigo.geneontology.org/amigo/term/GO:1900864"," HSD17B10"
0.132348447908569	1	6	479407894736842	Regulation of protein lipidation	http://amigo.geneontology.org/amigo/term/GO:1903059	RAB3GAP1	0.132348447908569,1,6,47.9407894736842,"Regulation of protein lipidation "," http://amigo.geneontology.org/amigo/term/GO:1903059"," RAB3GAP1"
0.132348447908569	1	6	479407894736842	Positive regulation of ER-associated ubiquitin-dependent protein catabolic process	http://amigo.geneontology.org/amigo/term/GO:1903071	SGTA	0.132348447908569,1,6,47.9407894736842,"Positive regulation of ER-associated ubiquitin-dependent protein catabolic process "," http://amigo.geneontology.org/amigo/term/GO:1903071"," SGTA"
0.132348447908569	1	6	479407894736842	Regulation of endoplasmic reticulum tubular network organization	http://amigo.geneontology.org/amigo/term/GO:1903371	RAB3GAP1	0.132348447908569,1,6,47.9407894736842,"Regulation of endoplasmic reticulum tubular network organization "," http://amigo.geneontology.org/amigo/term/GO:1903371"," RAB3GAP1"
0.132348447908569	1	6	479407894736842	Intrinsic apoptotic signaling pathway in response to hypoxia	http://amigo.geneontology.org/amigo/term/GO:1990144	ENO1	0.132348447908569,1,6,47.9407894736842,"Intrinsic apoptotic signaling pathway in response to hypoxia "," http://amigo.geneontology.org/amigo/term/GO:1990144"," ENO1"
0.132348447908569	1	6	479407894736842	Positive regulation of ATP biosynthetic process	http://amigo.geneontology.org/amigo/term/GO:2001171	ENO1	0.132348447908569,1,6,47.9407894736842,"Positive regulation of ATP biosynthetic process "," http://amigo.geneontology.org/amigo/term/GO:2001171"," ENO1"
0.132348447908569	4	297	387400318979266	Nuclear envelope	http://amigo.geneontology.org/amigo/term/GO:0005635	CACYBP CPNE1 SEH1L CLIC1	0.132348447908569,4,297,3.87400318979266,"Nuclear envelope "," http://amigo.geneontology.org/amigo/term/GO:0005635"," CACYBP CPNE1 SEH1L CLIC1"
0.132348447908569	1	6	479407894736842	Myosin II complex	http://amigo.geneontology.org/amigo/term/GO:0016460	MYL9	0.132348447908569,1,6,47.9407894736842,"Myosin II complex "," http://amigo.geneontology.org/amigo/term/GO:0016460"," MYL9"
0.132348447908569	1	6	479407894736842	Endoplasmic reticulum chaperone complex	http://amigo.geneontology.org/amigo/term/GO:0034663	PPIB	0.132348447908569,1,6,47.9407894736842,"Endoplasmic reticulum chaperone complex "," http://amigo.geneontology.org/amigo/term/GO:0034663"," PPIB"
0.132348447908569	1	6	479407894736842	Ferric-chelate reductase activity	http://amigo.geneontology.org/amigo/term/GO:0000293	NOX5	0.132348447908569,1,6,47.9407894736842,"Ferric-chelate reductase activity "," http://amigo.geneontology.org/amigo/term/GO:0000293"," NOX5"
0.132348447908569	1	6	479407894736842	Neurotrophin TRK receptor binding	http://amigo.geneontology.org/amigo/term/GO:0005167	GRB2	0.132348447908569,1,6,47.9407894736842,"Neurotrophin TRK receptor binding "," http://amigo.geneontology.org/amigo/term/GO:0005167"," GRB2"
0.132348447908569	1	6	479407894736842	Testosterone dehydrogenase [NAD(P)] activity	http://amigo.geneontology.org/amigo/term/GO:0030283	HSD17B10	0.132348447908569,1,6,47.9407894736842,"Testosterone dehydrogenase [NAD(P)] activity "," http://amigo.geneontology.org/amigo/term/GO:0030283"," HSD17B10"
0.132348447908569	1	6	479407894736842	Thiamine pyrophosphate binding	http://amigo.geneontology.org/amigo/term/GO:0030976	OGDH	0.132348447908569,1,6,47.9407894736842,"Thiamine pyrophosphate binding "," http://amigo.geneontology.org/amigo/term/GO:0030976"," OGDH"
0.132348447908569	1	6	479407894736842	Myosin heavy chain binding	http://amigo.geneontology.org/amigo/term/GO:0032036	MYL9	0.132348447908569,1,6,47.9407894736842,"Myosin heavy chain binding "," http://amigo.geneontology.org/amigo/term/GO:0032036"," MYL9"
0.132348447908569	1	6	479407894736842	Sulfatide binding	http://amigo.geneontology.org/amigo/term/GO:0120146	MANF	0.132348447908569,1,6,47.9407894736842,"Sulfatide binding "," http://amigo.geneontology.org/amigo/term/GO:0120146"," MANF"
0.132348447908569	1	6	479407894736842	Arrestin family protein binding	http://amigo.geneontology.org/amigo/term/GO:1990763	ARRB1	0.132348447908569,1,6,47.9407894736842,"Arrestin family protein binding "," http://amigo.geneontology.org/amigo/term/GO:1990763"," ARRB1"
0.132348447908569	1	6	479407894736842	Bta-mir-2478 target gene	https://www.mirnet.ca	PLEK	0.132348447908569,1,6,47.9407894736842,"Bta-mir-2478 target gene","https://www.mirnet.ca"," PLEK"
0.132348447908569	1	6	479407894736842	P00051 TCA cycle	ftp://ftp.pantherdb.org/pathway/current_release	OGDH	0.132348447908569,1,6,47.9407894736842,"P00051 TCA cycle","ftp://ftp.pantherdb.org/pathway/current_release"," OGDH"
0.132348447908569	3	167	516727072171447	P00057 Wnt signaling pathway	ftp://ftp.pantherdb.org/pathway/current_release	ACTC1 PPP3R1 ARRB1	0.132348447908569,3,167,5.16727072171447,"P00057 Wnt signaling pathway","ftp://ftp.pantherdb.org/pathway/current_release"," ACTC1 PPP3R1 ARRB1"
0.133290268030947	2	64	898889802631579	Voltage-gated potassium channel complex	http://amigo.geneontology.org/amigo/term/GO:0008076	KCNA10 KCNMA1	0.133290268030947,2,64,8.98889802631579,"Voltage-gated potassium channel complex "," http://amigo.geneontology.org/amigo/term/GO:0008076"," KCNA10 KCNMA1"
0.133290268030947	2	64	898889802631579	Modified amino acid binding	http://amigo.geneontology.org/amigo/term/GO:0072341	CPNE1 TLN1	0.133290268030947,2,64,8.98889802631579,"Modified amino acid binding "," http://amigo.geneontology.org/amigo/term/GO:0072341"," CPNE1 TLN1"
0.136088500108389	2	65	885060728744939	Glycolytic process	http://amigo.geneontology.org/amigo/term/GO:0006096	ALDOA ENO1	0.136088500108389,2,65,8.85060728744939,"Glycolytic process "," http://amigo.geneontology.org/amigo/term/GO:0006096"," ALDOA ENO1"
0.136088500108389	2	65	885060728744939	ATP generation from ADP	http://amigo.geneontology.org/amigo/term/GO:0006757	ALDOA ENO1	0.136088500108389,2,65,8.85060728744939,"ATP generation from ADP "," http://amigo.geneontology.org/amigo/term/GO:0006757"," ALDOA ENO1"
0.136088500108389	6	625	276138947368421	Nuclear body	http://amigo.geneontology.org/amigo/term/GO:0016604	U2AF1 HIPK3 SNRNP40 ARRB1 SIM2 PRPF40A	0.136088500108389,6,625,2.76138947368421,"Nuclear body "," http://amigo.geneontology.org/amigo/term/GO:0016604"," U2AF1 HIPK3 SNRNP40 ARRB1 SIM2 PRPF40A"
0.136088500108389	3	170	507608359133127	Tight junction	http://www.genome.jp/kegg-bin/show_pathway?bta04530	MYL6 MYL9 TUBA4A	0.136088500108389,3,170,5.07608359133127,"Tight junction","http://www.genome.jp/kegg-bin/show_pathway?bta04530 "," MYL6 MYL9 TUBA4A"
0.137733541127105	3	173	498805902038333	FLT3 Signaling	https://reactome.org/download/current	GRB2 RASA3 ARRB1	0.137733541127105,3,173,4.98805902038333,"FLT3 Signaling","https://reactome.org/download/current"," GRB2 RASA3 ARRB1"
0.137733541127105	1	7	410921052631579	Regulation of localization of FOXO transcription factors	https://reactome.org/download/current	YWHAZ	0.137733541127105,1,7,41.0921052631579,"Regulation of localization of FOXO transcription factors","https://reactome.org/download/current"," YWHAZ"
0.137733541127105	1	7	410921052631579	Glucagon signaling in metabolic regulation	https://reactome.org/download/current	PRKAR2A	0.137733541127105,1,7,41.0921052631579,"Glucagon signaling in metabolic regulation","https://reactome.org/download/current"," PRKAR2A"
0.137733541127105	2	68	846013931888545	Fcgamma receptor FCGR dependent phagocytosis	https://reactome.org/download/current	WIPF1 GRB2	0.137733541127105,2,68,8.46013931888545,"Fcgamma receptor FCGR dependent phagocytosis","https://reactome.org/download/current"," WIPF1 GRB2"
0.137733541127105	1	7	410921052631579	G protein-coupled receptor internalization	http://amigo.geneontology.org/amigo/term/GO:0002031	ARRB1	0.137733541127105,1,7,41.0921052631579,"G protein-coupled receptor internalization "," http://amigo.geneontology.org/amigo/term/GO:0002031"," ARRB1"
0.137733541127105	1	7	410921052631579	Signal attenuation	https://reactome.org/download/current	GRB2	0.137733541127105,1,7,41.0921052631579,"Signal attenuation","https://reactome.org/download/current"," GRB2"
0.137733541127105	1	7	410921052631579	2-oxoglutarate metabolic process	http://amigo.geneontology.org/amigo/term/GO:0006103	OGDH	0.137733541127105,1,7,41.0921052631579,"2-oxoglutarate metabolic process "," http://amigo.geneontology.org/amigo/term/GO:0006103"," OGDH"
0.137733541127105	2	69	833752860411899	Apoptotic mitochondrial changes	http://amigo.geneontology.org/amigo/term/GO:0008637	PDCD5 OPA1	0.137733541127105,2,69,8.33752860411899,"Apoptotic mitochondrial changes "," http://amigo.geneontology.org/amigo/term/GO:0008637"," PDCD5 OPA1"
0.137733541127105	1	7	410921052631579	Regulation of inositol phosphate biosynthetic process	http://amigo.geneontology.org/amigo/term/GO:0010919	PLEK	0.137733541127105,1,7,41.0921052631579,"Regulation of inositol phosphate biosynthetic process "," http://amigo.geneontology.org/amigo/term/GO:0010919"," PLEK"
0.137733541127105	1	7	410921052631579	Urinary tract smooth muscle contraction	http://amigo.geneontology.org/amigo/term/GO:0014848	KCNMA1	0.137733541127105,1,7,41.0921052631579,"Urinary tract smooth muscle contraction "," http://amigo.geneontology.org/amigo/term/GO:0014848"," KCNMA1"
0.137733541127105	3	178	484794500295683	Protein processing	http://amigo.geneontology.org/amigo/term/GO:0016485	PMPCB ENO1 GSN	0.137733541127105,3,178,4.84794500295683,"Protein processing "," http://amigo.geneontology.org/amigo/term/GO:0016485"," PMPCB ENO1 GSN"
0.137733541127105	2	67	858641005498822	Limbic system development	http://amigo.geneontology.org/amigo/term/GO:0021761	OGDH RAB3GAP1	0.137733541127105,2,67,8.58641005498822,"Limbic system development "," http://amigo.geneontology.org/amigo/term/GO:0021761"," OGDH RAB3GAP1"
0.137733541127105	1	7	410921052631579	Pyramidal neuron differentiation	http://amigo.geneontology.org/amigo/term/GO:0021859	OGDH	0.137733541127105,1,7,41.0921052631579,"Pyramidal neuron differentiation "," http://amigo.geneontology.org/amigo/term/GO:0021859"," OGDH"
0.137733541127105	1	7	410921052631579	Tangential migration from the subventricular zone to the olfactory bulb	http://amigo.geneontology.org/amigo/term/GO:0022028	OGDH	0.137733541127105,1,7,41.0921052631579,"Tangential migration from the subventricular zone to the olfactory bulb "," http://amigo.geneontology.org/amigo/term/GO:0022028"," OGDH"
0.137733541127105	1	7	410921052631579	Fructose 1,6-bisphosphate metabolic process	http://amigo.geneontology.org/amigo/term/GO:0030388	ALDOA	0.137733541127105,1,7,41.0921052631579,"Fructose 1,6-bisphosphate metabolic process "," http://amigo.geneontology.org/amigo/term/GO:0030388"," ALDOA"
0.137733541127105	2	66	871650717703349	Neutrophil chemotaxis	http://amigo.geneontology.org/amigo/term/GO:0030593	MCU PPIB	0.137733541127105,2,66,8.71650717703349,"Neutrophil chemotaxis "," http://amigo.geneontology.org/amigo/term/GO:0030593"," MCU PPIB"
0.137733541127105	3	175	493105263157895	Positive regulation of protein-containing complex assembly	http://amigo.geneontology.org/amigo/term/GO:0031334	GRB2 PLEK GSN	0.137733541127105,3,175,4.93105263157895,"Positive regulation of protein-containing complex assembly "," http://amigo.geneontology.org/amigo/term/GO:0031334"," GRB2 PLEK GSN"
0.137733541127105	2	66	871650717703349	Regulation of telomere maintenance	http://amigo.geneontology.org/amigo/term/GO:0032204	CCT6A CCT2	0.137733541127105,2,66,8.71650717703349,"Regulation of telomere maintenance "," http://amigo.geneontology.org/amigo/term/GO:0032204"," CCT6A CCT2"
0.137733541127105	1	7	410921052631579	Actin-myosin filament sliding	http://amigo.geneontology.org/amigo/term/GO:0033275	ACTC1	0.137733541127105,1,7,41.0921052631579,"Actin-myosin filament sliding "," http://amigo.geneontology.org/amigo/term/GO:0033275"," ACTC1"
0.137733541127105	1	7	410921052631579	Positive regulation of integrin activation	http://amigo.geneontology.org/amigo/term/GO:0033625	PLEK	0.137733541127105,1,7,41.0921052631579,"Positive regulation of integrin activation "," http://amigo.geneontology.org/amigo/term/GO:0033625"," PLEK"
0.137733541127105	1	7	410921052631579	TRNA 3 -end processing	http://amigo.geneontology.org/amigo/term/GO:0042780	HSD17B10	0.137733541127105,1,7,41.0921052631579,"TRNA 3 -end processing "," http://amigo.geneontology.org/amigo/term/GO:0042780"," HSD17B10"
0.137733541127105	3	177	487533452274755	Positive regulation of cytoskeleton organization	http://amigo.geneontology.org/amigo/term/GO:0051495	GRB2 PLEK GSN	0.137733541127105,3,177,4.87533452274755,"Positive regulation of cytoskeleton organization "," http://amigo.geneontology.org/amigo/term/GO:0051495"," GRB2 PLEK GSN"
0.137733541127105	1	7	410921052631579	Relaxation of cardiac muscle	http://amigo.geneontology.org/amigo/term/GO:0055119	GSN	0.137733541127105,1,7,41.0921052631579,"Relaxation of cardiac muscle "," http://amigo.geneontology.org/amigo/term/GO:0055119"," GSN"
0.137733541127105	2	67	858641005498822	Establishment of protein localization to mitochondrion	http://amigo.geneontology.org/amigo/term/GO:0072655	PMPCB PDCD5	0.137733541127105,2,67,8.58641005498822,"Establishment of protein localization to mitochondrion "," http://amigo.geneontology.org/amigo/term/GO:0072655"," PMPCB PDCD5"
0.137733541127105	1	7	410921052631579	Actin filament reorganization	http://amigo.geneontology.org/amigo/term/GO:0090527	MCU	0.137733541127105,1,7,41.0921052631579,"Actin filament reorganization "," http://amigo.geneontology.org/amigo/term/GO:0090527"," MCU"
0.137733541127105	6	639	270088954781319	Inorganic cation transmembrane transport	http://amigo.geneontology.org/amigo/term/GO:0098662	MCU KCNA10 NOX5 KCNMA1 ATP6V1D F2RL3	0.137733541127105,6,639,2.70088954781319,"Inorganic cation transmembrane transport "," http://amigo.geneontology.org/amigo/term/GO:0098662"," MCU KCNA10 NOX5 KCNMA1 ATP6V1D F2RL3"
0.137733541127105	1	7	410921052631579	Regulation of postsynaptic neurotransmitter receptor internalization	http://amigo.geneontology.org/amigo/term/GO:0099149	PPP3R1	0.137733541127105,1,7,41.0921052631579,"Regulation of postsynaptic neurotransmitter receptor internalization "," http://amigo.geneontology.org/amigo/term/GO:0099149"," PPP3R1"
0.137733541127105	1	7	410921052631579	Cellular detoxification of aldehyde	http://amigo.geneontology.org/amigo/term/GO:0110095	ESD	0.137733541127105,1,7,41.0921052631579,"Cellular detoxification of aldehyde "," http://amigo.geneontology.org/amigo/term/GO:0110095"," ESD"
0.137733541127105	1	7	410921052631579	Negative regulation of ERAD pathway	http://amigo.geneontology.org/amigo/term/GO:1904293	SGTA	0.137733541127105,1,7,41.0921052631579,"Negative regulation of ERAD pathway "," http://amigo.geneontology.org/amigo/term/GO:1904293"," SGTA"
0.137733541127105	1	7	410921052631579	Regulation of telomerase RNA localization to Cajal body	http://amigo.geneontology.org/amigo/term/GO:1904872	CCT2	0.137733541127105,1,7,41.0921052631579,"Regulation of telomerase RNA localization to Cajal body "," http://amigo.geneontology.org/amigo/term/GO:1904872"," CCT2"
0.137733541127105	2	67	858641005498822	Cellular detoxification	http://amigo.geneontology.org/amigo/term/GO:1990748	ESD GSR	0.137733541127105,2,67,8.58641005498822,"Cellular detoxification "," http://amigo.geneontology.org/amigo/term/GO:1990748"," ESD GSR"
0.137733541127105	2	67	858641005498822	Positive regulation of chromosome organization	http://amigo.geneontology.org/amigo/term/GO:2001252	CCT6A CCT2	0.137733541127105,2,67,8.58641005498822,"Positive regulation of chromosome organization "," http://amigo.geneontology.org/amigo/term/GO:2001252"," CCT6A CCT2"
0.137733541127105	1	7	410921052631579	Zona pellucida receptor complex	http://amigo.geneontology.org/amigo/term/GO:0002199	CCT2	0.137733541127105,1,7,41.0921052631579,"Zona pellucida receptor complex "," http://amigo.geneontology.org/amigo/term/GO:0002199"," CCT2"
0.137733541127105	1	7	410921052631579	CAMP-dependent protein kinase complex	http://amigo.geneontology.org/amigo/term/GO:0005952	PRKAR2A	0.137733541127105,1,7,41.0921052631579,"CAMP-dependent protein kinase complex "," http://amigo.geneontology.org/amigo/term/GO:0005952"," PRKAR2A"
0.137733541127105	1	7	410921052631579	Dihydrolipoyl dehydrogenase complex	http://amigo.geneontology.org/amigo/term/GO:0045240	OGDH	0.137733541127105,1,7,41.0921052631579,"Dihydrolipoyl dehydrogenase complex "," http://amigo.geneontology.org/amigo/term/GO:0045240"," OGDH"
0.137733541127105	1	7	410921052631579	PTW/PP1 phosphatase complex	http://amigo.geneontology.org/amigo/term/GO:0072357	PPP1R12A	0.137733541127105,1,7,41.0921052631579,"PTW/PP1 phosphatase complex "," http://amigo.geneontology.org/amigo/term/GO:0072357"," PPP1R12A"
0.137733541127105	1	7	410921052631579	Uniplex complex	http://amigo.geneontology.org/amigo/term/GO:1990246	MCU	0.137733541127105,1,7,41.0921052631579,"Uniplex complex "," http://amigo.geneontology.org/amigo/term/GO:1990246"," MCU"
0.137733541127105	4	309	372355646397547	Cation channel activity	http://amigo.geneontology.org/amigo/term/GO:0005261	MCU KCNA10 NOX5 KCNMA1	0.137733541127105,4,309,3.72355646397547,"Cation channel activity "," http://amigo.geneontology.org/amigo/term/GO:0005261"," MCU KCNA10 NOX5 KCNMA1"
0.137733541127105	4	308	373564593301435	Tubulin binding	http://amigo.geneontology.org/amigo/term/GO:0015631	CACYBP MAPRE2 PDCD5 OPA1	0.137733541127105,4,308,3.73564593301435,"Tubulin binding "," http://amigo.geneontology.org/amigo/term/GO:0015631"," CACYBP MAPRE2 PDCD5 OPA1"
0.137733541127105	1	7	410921052631579	Oxidoreductase activity, acting on the aldehyde or oxo group of donors, disulfide as acceptor	http://amigo.geneontology.org/amigo/term/GO:0016624	OGDH	0.137733541127105,1,7,41.0921052631579,"Oxidoreductase activity, acting on the aldehyde or oxo group of donors, disulfide as acceptor "," http://amigo.geneontology.org/amigo/term/GO:0016624"," OGDH"
0.137733541127105	3	178	484794500295683	Lyase activity	http://amigo.geneontology.org/amigo/term/GO:0016829	ALDOA ENO1 HADHA	0.137733541127105,3,178,4.84794500295683,"Lyase activity "," http://amigo.geneontology.org/amigo/term/GO:0016829"," ALDOA ENO1 HADHA"
0.137733541127105	1	7	410921052631579	Immunoglobulin binding	http://amigo.geneontology.org/amigo/term/GO:0019865	VWF	0.137733541127105,1,7,41.0921052631579,"Immunoglobulin binding "," http://amigo.geneontology.org/amigo/term/GO:0019865"," VWF"
0.137733541127105	1	7	410921052631579	Insulin receptor substrate binding	http://amigo.geneontology.org/amigo/term/GO:0043560	GRB2	0.137733541127105,1,7,41.0921052631579,"Insulin receptor substrate binding "," http://amigo.geneontology.org/amigo/term/GO:0043560"," GRB2"
0.137733541127105	1	7	410921052631579	Muscle alpha-actinin binding	http://amigo.geneontology.org/amigo/term/GO:0051371	PDLIM1	0.137733541127105,1,7,41.0921052631579,"Muscle alpha-actinin binding "," http://amigo.geneontology.org/amigo/term/GO:0051371"," PDLIM1"
0.137733541127105	2	69	833752860411899	Renin secretion	http://www.genome.jp/kegg-bin/show_pathway?bta04924	PPP3R1 KCNMA1	0.137733541127105,2,69,8.33752860411899,"Renin secretion","http://www.genome.jp/kegg-bin/show_pathway?bta04924 "," PPP3R1 KCNMA1"
0.137733541127105	4	315	365263157894737	Bta-mir-2389 target gene	https://www.mirnet.ca	XPNPEP1 MYL9 ALDOA OAS1Z	0.137733541127105,4,315,3.65263157894737,"Bta-mir-2389 target gene","https://www.mirnet.ca"," XPNPEP1 MYL9 ALDOA OAS1Z"
0.137733541127105	2	69	833752860411899	Bta-mir-2450a target gene	https://www.mirnet.ca	LGALS3BP OGDH	0.137733541127105,2,69,8.33752860411899,"Bta-mir-2450a target gene","https://www.mirnet.ca"," LGALS3BP OGDH"
0.137963531295369	5	472	304708407671722	Pathways of neurodegeneration	http://www.genome.jp/kegg-bin/show_pathway?bta05022	PSMB3 MCU PPP3R1 HSD17B10 TUBA4A	0.137963531295369,5,472,3.04708407671722,"Pathways of neurodegeneration","http://www.genome.jp/kegg-bin/show_pathway?bta05022 "," PSMB3 MCU PPP3R1 HSD17B10 TUBA4A"
0.13916045717609	3	179	48208615113202	Cilium Assembly	https://reactome.org/download/current	DYNLRB1 CCT2 TUBA4A	0.13916045717609,3,179,4.8208615113202,"Cilium Assembly","https://reactome.org/download/current"," DYNLRB1 CCT2 TUBA4A"
0.139688517747231	2	70	821842105263158	Fc epsilon receptor FCERI signaling	https://reactome.org/download/current	GRB2 PPP3R1	0.139688517747231,2,70,8.21842105263158,"Fc epsilon receptor FCERI signaling","https://reactome.org/download/current"," GRB2 PPP3R1"
0.139688517747231	2	70	821842105263158	Endoplasmic reticulum organization	http://amigo.geneontology.org/amigo/term/GO:0007029	RAB3GAP1 SGTA	0.139688517747231,2,70,8.21842105263158,"Endoplasmic reticulum organization "," http://amigo.geneontology.org/amigo/term/GO:0007029"," RAB3GAP1 SGTA"
0.139727016310957	4	318	361817279046673	Regulation of establishment of protein localization	http://amigo.geneontology.org/amigo/term/GO:0070201	MCU CCT6A PDCD5 CCT2	0.139727016310957,4,318,3.61817279046673,"Regulation of establishment of protein localization "," http://amigo.geneontology.org/amigo/term/GO:0070201"," MCU CCT6A PDCD5 CCT2"
0.139727016310957	3	180	479407894736842	Cation channel complex	http://amigo.geneontology.org/amigo/term/GO:0034703	MCU KCNA10 KCNMA1	0.139727016310957,3,180,4.79407894736842,"Cation channel complex "," http://amigo.geneontology.org/amigo/term/GO:0034703"," MCU KCNA10 KCNMA1"
0.139727016310957	5	475	302783933518005	Bta-mir-6535 target gene	https://www.mirnet.ca	OGDH FKBP1A MYL9 HSD17B10 ARRB1	0.139727016310957,5,475,3.02783933518005,"Bta-mir-6535 target gene","https://www.mirnet.ca"," OGDH FKBP1A MYL9 HSD17B10 ARRB1"
0.141030515427053	7	830	242591946734306	Anatomical structure formation involved in morphogenesis	http://amigo.geneontology.org/amigo/term/GO:0048646	YWHAZ GRB2 ACTC1 PPP3R1 CD9 GABPA OPA1	0.141030515427053,7,830,2.42591946734306,"Anatomical structure formation involved in morphogenesis "," http://amigo.geneontology.org/amigo/term/GO:0048646"," YWHAZ GRB2 ACTC1 PPP3R1 CD9 GABPA OPA1"
0.141666097224809	2	71	810266864343958	ADP metabolic process	http://amigo.geneontology.org/amigo/term/GO:0046031	ALDOA ENO1	0.141666097224809,2,71,8.10266864343958,"ADP metabolic process "," http://amigo.geneontology.org/amigo/term/GO:0046031"," ALDOA ENO1"
0.141666097224809	2	71	810266864343958	Protein localization to mitochondrion	http://amigo.geneontology.org/amigo/term/GO:0070585	PMPCB PDCD5	0.141666097224809,2,71,8.10266864343958,"Protein localization to mitochondrion "," http://amigo.geneontology.org/amigo/term/GO:0070585"," PMPCB PDCD5"
0.141748992226354	3	183	471548748921484	Other interleukin signaling	https://reactome.org/download/current	GRB2 RASA3 ARRB1	0.141748992226354,3,183,4.71548748921484,"Other interleukin signaling","https://reactome.org/download/current"," GRB2 RASA3 ARRB1"
0.141748992226354	3	187	461462144666479	MAPK family signaling cascades	https://reactome.org/download/current	GRB2 RASA3 ARRB1	0.141748992226354,3,187,4.61462144666479,"MAPK family signaling cascades","https://reactome.org/download/current"," GRB2 RASA3 ARRB1"
0.141748992226354	2	74	777418207681366	RAB GEFs exchange GTP for GDP on RABs	https://reactome.org/download/current	RAB27A RAB3GAP1	0.141748992226354,2,74,7.77418207681366,"RAB GEFs exchange GTP for GDP on RABs","https://reactome.org/download/current"," RAB27A RAB3GAP1"
0.141748992226354	1	8	359555921052632	EGFR Transactivation by Gastrin	https://reactome.org/download/current	GRB2	0.141748992226354,1,8,35.9555921052632,"EGFR Transactivation by Gastrin","https://reactome.org/download/current"," GRB2"
0.141748992226354	1	8	359555921052632	Calcineurin activates NFAT	https://reactome.org/download/current	PPP3R1	0.141748992226354,1,8,35.9555921052632,"Calcineurin activates NFAT","https://reactome.org/download/current"," PPP3R1"
0.141748992226354	1	8	359555921052632	CLEC7A Dectin-1 induces NFAT activation	https://reactome.org/download/current	PPP3R1	0.141748992226354,1,8,35.9555921052632,"CLEC7A Dectin-1 induces NFAT activation","https://reactome.org/download/current"," PPP3R1"
0.141748992226354	1	8	359555921052632	Mitochondrial fatty acid beta-oxidation of saturated fatty acids	https://reactome.org/download/current	HADHA	0.141748992226354,1,8,35.9555921052632,"Mitochondrial fatty acid beta-oxidation of saturated fatty acids","https://reactome.org/download/current"," HADHA"
0.141748992226354	1	8	359555921052632	WP1021 Phase I biotransformations non P450	http://www.wikipathways.org/instance/WP1021_r95737	ESD	0.141748992226354,1,8,35.9555921052632,"WP1021 Phase I biotransformations non P450","http://www.wikipathways.org/instance/WP1021_r95737"," ESD"
0.141748992226354	1	8	359555921052632	Platelet degranulation	http://amigo.geneontology.org/amigo/term/GO:0002576	PLEK	0.141748992226354,1,8,35.9555921052632,"Platelet degranulation "," http://amigo.geneontology.org/amigo/term/GO:0002576"," PLEK"
0.141748992226354	1	8	359555921052632	Fructose metabolic process	http://amigo.geneontology.org/amigo/term/GO:0006000	ALDOA	0.141748992226354,1,8,35.9555921052632,"Fructose metabolic process "," http://amigo.geneontology.org/amigo/term/GO:0006000"," ALDOA"
0.141748992226354	2	72	799013157894737	Fatty acid catabolic process	http://amigo.geneontology.org/amigo/term/GO:0009062	HADHA HSD17B10	0.141748992226354,2,72,7.99013157894737,"Fatty acid catabolic process "," http://amigo.geneontology.org/amigo/term/GO:0009062"," HADHA HSD17B10"
0.141748992226354	1	8	359555921052632	Purine nucleobase biosynthetic process	http://amigo.geneontology.org/amigo/term/GO:0009113	GART	0.141748992226354,1,8,35.9555921052632,"Purine nucleobase biosynthetic process "," http://amigo.geneontology.org/amigo/term/GO:0009113"," GART"
0.141748992226354	2	72	799013157894737	Nucleoside triphosphate biosynthetic process	http://amigo.geneontology.org/amigo/term/GO:0009142	ALDOA ENO1	0.141748992226354,2,72,7.99013157894737,"Nucleoside triphosphate biosynthetic process "," http://amigo.geneontology.org/amigo/term/GO:0009142"," ALDOA ENO1"
0.141748992226354	1	8	359555921052632	AUF1 hnRNP D0 binds and destabilizes mRNA	https://reactome.org/download/current	HSPA1A	0.141748992226354,1,8,35.9555921052632,"AUF1 hnRNP D0 binds and destabilizes mRNA","https://reactome.org/download/current"," HSPA1A"
0.141748992226354	1	8	359555921052632	Regulation of plasminogen activation	http://amigo.geneontology.org/amigo/term/GO:0010755	ENO1	0.141748992226354,1,8,35.9555921052632,"Regulation of plasminogen activation "," http://amigo.geneontology.org/amigo/term/GO:0010755"," ENO1"
0.141748992226354	1	8	359555921052632	Myotube differentiation involved in skeletal muscle regeneration	http://amigo.geneontology.org/amigo/term/GO:0014908	CD9	0.141748992226354,1,8,35.9555921052632,"Myotube differentiation involved in skeletal muscle regeneration "," http://amigo.geneontology.org/amigo/term/GO:0014908"," CD9"
0.141748992226354	2	73	788067772170151	Regulation of Rho protein signal transduction	http://amigo.geneontology.org/amigo/term/GO:0035023	ARRB1 F2RL3	0.141748992226354,2,73,7.88067772170151,"Regulation of Rho protein signal transduction "," http://amigo.geneontology.org/amigo/term/GO:0035023"," ARRB1 F2RL3"
0.141748992226354	1	8	359555921052632	Glycolytic process through fructose-6-phosphate	http://amigo.geneontology.org/amigo/term/GO:0061615	ENO1	0.141748992226354,1,8,35.9555921052632,"Glycolytic process through fructose-6-phosphate "," http://amigo.geneontology.org/amigo/term/GO:0061615"," ENO1"
0.141748992226354	1	8	359555921052632	RNA localization to Cajal body	http://amigo.geneontology.org/amigo/term/GO:0090670	CCT2	0.141748992226354,1,8,35.9555921052632,"RNA localization to Cajal body "," http://amigo.geneontology.org/amigo/term/GO:0090670"," CCT2"
0.141748992226354	1	8	359555921052632	Telomerase RNA localization to Cajal body	http://amigo.geneontology.org/amigo/term/GO:0090671	CCT2	0.141748992226354,1,8,35.9555921052632,"Telomerase RNA localization to Cajal body "," http://amigo.geneontology.org/amigo/term/GO:0090671"," CCT2"
0.141748992226354	1	8	359555921052632	Telomerase RNA localization	http://amigo.geneontology.org/amigo/term/GO:0090672	CCT2	0.141748992226354,1,8,35.9555921052632,"Telomerase RNA localization "," http://amigo.geneontology.org/amigo/term/GO:0090672"," CCT2"
0.141748992226354	1	8	359555921052632	RNA localization to nucleus	http://amigo.geneontology.org/amigo/term/GO:0090685	CCT2	0.141748992226354,1,8,35.9555921052632,"RNA localization to nucleus "," http://amigo.geneontology.org/amigo/term/GO:0090685"," CCT2"
0.141748992226354	2	72	799013157894737	Cellular response to toxic substance	http://amigo.geneontology.org/amigo/term/GO:0097237	ESD GSR	0.141748992226354,2,72,7.99013157894737,"Cellular response to toxic substance "," http://amigo.geneontology.org/amigo/term/GO:0097237"," ESD GSR"
0.141748992226354	2	72	799013157894737	Cell-substrate junction organization	http://amigo.geneontology.org/amigo/term/GO:0150115	MAPRE2 TLN1	0.141748992226354,2,72,7.99013157894737,"Cell-substrate junction organization "," http://amigo.geneontology.org/amigo/term/GO:0150115"," MAPRE2 TLN1"
0.141748992226354	1	8	359555921052632	Regulation of cellular response to hypoxia	http://amigo.geneontology.org/amigo/term/GO:1900037	ENO1	0.141748992226354,1,8,35.9555921052632,"Regulation of cellular response to hypoxia "," http://amigo.geneontology.org/amigo/term/GO:1900037"," ENO1"
0.141748992226354	2	73	788067772170151	Regulation of protein depolymerization	http://amigo.geneontology.org/amigo/term/GO:1901879	PLEK GSN	0.141748992226354,2,73,7.88067772170151,"Regulation of protein depolymerization "," http://amigo.geneontology.org/amigo/term/GO:1901879"," PLEK GSN"
0.141748992226354	6	655	263491361992768	Positive regulation of intracellular signal transduction	http://amigo.geneontology.org/amigo/term/GO:1902533	CPNE1 MAPRE2 SEH1L VWF ARRB1 F2RL3	0.141748992226354,6,655,2.63491361992768,"Positive regulation of intracellular signal transduction "," http://amigo.geneontology.org/amigo/term/GO:1902533"," CPNE1 MAPRE2 SEH1L VWF ARRB1 F2RL3"
0.141748992226354	1	8	359555921052632	Positive regulation of tumor necrosis factor-mediated signaling pathway	http://amigo.geneontology.org/amigo/term/GO:1903265	CPNE1	0.141748992226354,1,8,35.9555921052632,"Positive regulation of tumor necrosis factor-mediated signaling pathway "," http://amigo.geneontology.org/amigo/term/GO:1903265"," CPNE1"
0.141748992226354	3	183	471548748921484	Positive regulation of cellular protein localization	http://amigo.geneontology.org/amigo/term/GO:1903829	CCT6A PDCD5 CCT2	0.141748992226354,3,183,4.71548748921484,"Positive regulation of cellular protein localization "," http://amigo.geneontology.org/amigo/term/GO:1903829"," CCT6A PDCD5 CCT2"
0.141748992226354	1	8	359555921052632	Positive regulation of autophagosome assembly	http://amigo.geneontology.org/amigo/term/GO:2000786	RAB3GAP1	0.141748992226354,1,8,35.9555921052632,"Positive regulation of autophagosome assembly "," http://amigo.geneontology.org/amigo/term/GO:2000786"," RAB3GAP1"
0.141748992226354	2	73	788067772170151	Potassium channel complex	http://amigo.geneontology.org/amigo/term/GO:0034705	KCNA10 KCNMA1	0.141748992226354,2,73,7.88067772170151,"Potassium channel complex "," http://amigo.geneontology.org/amigo/term/GO:0034705"," KCNA10 KCNMA1"
0.141748992226354	1	8	359555921052632	G protein activity	http://amigo.geneontology.org/amigo/term/GO:0003925	RAB27A	0.141748992226354,1,8,35.9555921052632,"G protein activity "," http://amigo.geneontology.org/amigo/term/GO:0003925"," RAB27A"
0.141748992226354	1	8	359555921052632	Enoyl-CoA hydratase activity	http://amigo.geneontology.org/amigo/term/GO:0004300	HADHA	0.141748992226354,1,8,35.9555921052632,"Enoyl-CoA hydratase activity "," http://amigo.geneontology.org/amigo/term/GO:0004300"," HADHA"
0.141748992226354	1	8	359555921052632	CAMP-dependent protein kinase inhibitor activity	http://amigo.geneontology.org/amigo/term/GO:0004862	PRKAR2A	0.141748992226354,1,8,35.9555921052632,"CAMP-dependent protein kinase inhibitor activity "," http://amigo.geneontology.org/amigo/term/GO:0004862"," PRKAR2A"
0.141748992226354	1	8	359555921052632	Hydroxymethyl-, formyl- and related transferase activity	http://amigo.geneontology.org/amigo/term/GO:0016742	GART	0.141748992226354,1,8,35.9555921052632,"Hydroxymethyl-, formyl- and related transferase activity "," http://amigo.geneontology.org/amigo/term/GO:0016742"," GART"
0.141748992226354	1	8	359555921052632	Aldehyde-lyase activity	http://amigo.geneontology.org/amigo/term/GO:0016832	ALDOA	0.141748992226354,1,8,35.9555921052632,"Aldehyde-lyase activity "," http://amigo.geneontology.org/amigo/term/GO:0016832"," ALDOA"
0.141748992226354	1	8	359555921052632	Protein-disulfide reductase (NAD(P)) activity	http://amigo.geneontology.org/amigo/term/GO:0047134	GSR	0.141748992226354,1,8,35.9555921052632,"Protein-disulfide reductase (NAD(P)) activity "," http://amigo.geneontology.org/amigo/term/GO:0047134"," GSR"
0.141748992226354	1	8	359555921052632	Cardiolipin binding	http://amigo.geneontology.org/amigo/term/GO:1901612	OPA1	0.141748992226354,1,8,35.9555921052632,"Cardiolipin binding "," http://amigo.geneontology.org/amigo/term/GO:1901612"," OPA1"
0.141748992226354	2	72	799013157894737	B cell receptor signaling pathway	http://www.genome.jp/kegg-bin/show_pathway?bta04662	GRB2 PPP3R1	0.141748992226354,2,72,7.99013157894737,"B cell receptor signaling pathway","http://www.genome.jp/kegg-bin/show_pathway?bta04662 "," GRB2 PPP3R1"
0.141748992226354	4	324	355116959064327	Human papillomavirus infection	http://www.genome.jp/kegg-bin/show_pathway?bta05165	GRB2 ITGA2B VWF ATP6V1D	0.141748992226354,4,324,3.55116959064327,"Human papillomavirus infection","http://www.genome.jp/kegg-bin/show_pathway?bta05165 "," GRB2 ITGA2B VWF ATP6V1D"
0.142763801607156	4	329	349720044792833	Bta-mir-760-3p target gene	https://www.mirnet.ca	MYL9 ENO1 PRKAR2A RASA3	0.142763801607156,4,329,3.49720044792833,"Bta-mir-760-3p target gene","https://www.mirnet.ca"," MYL9 ENO1 PRKAR2A RASA3"
0.143368965106963	2	75	767052631578947	Signaling by Hedgehog	https://reactome.org/download/current	PRKAR2A TUBA4A	0.143368965106963,2,75,7.67052631578947,"Signaling by Hedgehog","https://reactome.org/download/current"," PRKAR2A TUBA4A"
0.143368965106963	2	75	767052631578947	Mitochondrial membrane organization	http://amigo.geneontology.org/amigo/term/GO:0007006	PDCD5 OPA1	0.143368965106963,2,75,7.67052631578947,"Mitochondrial membrane organization "," http://amigo.geneontology.org/amigo/term/GO:0007006"," PDCD5 OPA1"
0.143368965106963	2	75	767052631578947	Cellular component assembly involved in morphogenesis	http://amigo.geneontology.org/amigo/term/GO:0010927	ACTC1 CD9	0.143368965106963,2,75,7.67052631578947,"Cellular component assembly involved in morphogenesis "," http://amigo.geneontology.org/amigo/term/GO:0010927"," ACTC1 CD9"
0.143368965106963	2	75	767052631578947	Fatty acid oxidation	http://amigo.geneontology.org/amigo/term/GO:0019395	HADHA HSD17B10	0.143368965106963,2,75,7.67052631578947,"Fatty acid oxidation "," http://amigo.geneontology.org/amigo/term/GO:0019395"," HADHA HSD17B10"
0.143368965106963	2	75	767052631578947	P00047 PDGF signaling pathway	ftp://ftp.pantherdb.org/pathway/current_release	GRB2 GABPA	0.143368965106963,2,75,7.67052631578947,"P00047 PDGF signaling pathway","ftp://ftp.pantherdb.org/pathway/current_release"," GRB2 GABPA"
0.146101455789413	2	76	756959833795014	Regulation of G protein-coupled receptor signaling pathway	http://amigo.geneontology.org/amigo/term/GO:0008277	PLEK ARRB1	0.146101455789413,2,76,7.56959833795014,"Regulation of G protein-coupled receptor signaling pathway "," http://amigo.geneontology.org/amigo/term/GO:0008277"," PLEK ARRB1"
0.146101455789413	2	76	756959833795014	Carbon-oxygen lyase activity	http://amigo.geneontology.org/amigo/term/GO:0016835	ENO1 HADHA	0.146101455789413,2,76,7.56959833795014,"Carbon-oxygen lyase activity "," http://amigo.geneontology.org/amigo/term/GO:0016835"," ENO1 HADHA"
0.146101455789413	2	76	756959833795014	Phosphatase regulator activity	http://amigo.geneontology.org/amigo/term/GO:0019208	PPP3R1 PPP1R12A	0.146101455789413,2,76,7.56959833795014,"Phosphatase regulator activity "," http://amigo.geneontology.org/amigo/term/GO:0019208"," PPP3R1 PPP1R12A"
0.147526344222752	4	336	342434210526316	Signaling by Interleukins	https://reactome.org/download/current	YWHAZ GRB2 RASA3 ARRB1	0.147526344222752,4,336,3.42434210526316,"Signaling by Interleukins","https://reactome.org/download/current"," YWHAZ GRB2 RASA3 ARRB1"
0.147526344222752	1	9	319605263157895	GP1b-IX-V activation signalling	https://reactome.org/download/current	YWHAZ	0.147526344222752,1,9,31.9605263157895,"GP1b-IX-V activation signalling","https://reactome.org/download/current"," YWHAZ"
0.147526344222752	1	9	319605263157895	Citric acid cycle TCA cycle	https://reactome.org/download/current	IDH2	0.147526344222752,1,9,31.9605263157895,"Citric acid cycle TCA cycle","https://reactome.org/download/current"," IDH2"
0.147526344222752	1	9	319605263157895	Dissolution of Fibrin Clot	https://reactome.org/download/current	SERPINB2	0.147526344222752,1,9,31.9605263157895,"Dissolution of Fibrin Clot","https://reactome.org/download/current"," SERPINB2"
0.147526344222752	1	9	319605263157895	Ca2+ activated K+ channels	https://reactome.org/download/current	KCNMA1	0.147526344222752,1,9,31.9605263157895,"Ca2+ activated K+ channels","https://reactome.org/download/current"," KCNMA1"
0.147526344222752	1	9	319605263157895	Branched-chain amino acid catabolic process	http://amigo.geneontology.org/amigo/term/GO:0009083	HSD17B10	0.147526344222752,1,9,31.9605263157895,"Branched-chain amino acid catabolic process "," http://amigo.geneontology.org/amigo/term/GO:0009083"," HSD17B10"
0.147526344222752	2	77	747129186602871	Purine nucleoside diphosphate metabolic process	http://amigo.geneontology.org/amigo/term/GO:0009135	ALDOA ENO1	0.147526344222752,2,77,7.47129186602871,"Purine nucleoside diphosphate metabolic process "," http://amigo.geneontology.org/amigo/term/GO:0009135"," ALDOA ENO1"
0.147526344222752	2	77	747129186602871	Purine ribonucleoside diphosphate metabolic process	http://amigo.geneontology.org/amigo/term/GO:0009179	ALDOA ENO1	0.147526344222752,2,77,7.47129186602871,"Purine ribonucleoside diphosphate metabolic process "," http://amigo.geneontology.org/amigo/term/GO:0009179"," ALDOA ENO1"
0.147526344222752	6	676	255305979445656	Carboxylic acid metabolic process	http://amigo.geneontology.org/amigo/term/GO:0019752	OGDH ALDOA ENO1 IDH2 HADHA HSD17B10	0.147526344222752,6,676,2.55305979445656,"Carboxylic acid metabolic process "," http://amigo.geneontology.org/amigo/term/GO:0019752"," OGDH ALDOA ENO1 IDH2 HADHA HSD17B10"
0.147526344222752	1	9	319605263157895	Thalamus development	http://amigo.geneontology.org/amigo/term/GO:0021794	OGDH	0.147526344222752,1,9,31.9605263157895,"Thalamus development "," http://amigo.geneontology.org/amigo/term/GO:0021794"," OGDH"
0.147526344222752	1	9	319605263157895	Attenuation phase	https://reactome.org/download/current	HSPA1A	0.147526344222752,1,9,31.9605263157895,"Attenuation phase","https://reactome.org/download/current"," HSPA1A"
0.147526344222752	1	9	319605263157895	Regulation of keratinocyte migration	http://amigo.geneontology.org/amigo/term/GO:0051547	MAPRE2	0.147526344222752,1,9,31.9605263157895,"Regulation of keratinocyte migration "," http://amigo.geneontology.org/amigo/term/GO:0051547"," MAPRE2"
0.147526344222752	1	9	319605263157895	Positive regulation of keratinocyte migration	http://amigo.geneontology.org/amigo/term/GO:0051549	MAPRE2	0.147526344222752,1,9,31.9605263157895,"Positive regulation of keratinocyte migration "," http://amigo.geneontology.org/amigo/term/GO:0051549"," MAPRE2"
0.147526344222752	1	9	319605263157895	Branching involved in labyrinthine layer morphogenesis	http://amigo.geneontology.org/amigo/term/GO:0060670	GRB2	0.147526344222752,1,9,31.9605263157895,"Branching involved in labyrinthine layer morphogenesis "," http://amigo.geneontology.org/amigo/term/GO:0060670"," GRB2"
0.147526344222752	1	9	319605263157895	Tricarboxylic acid metabolic process	http://amigo.geneontology.org/amigo/term/GO:0072350	IDH2	0.147526344222752,1,9,31.9605263157895,"Tricarboxylic acid metabolic process "," http://amigo.geneontology.org/amigo/term/GO:0072350"," IDH2"
0.147526344222752	1	9	319605263157895	Negative regulation of platelet aggregation	http://amigo.geneontology.org/amigo/term/GO:0090331	CD9	0.147526344222752,1,9,31.9605263157895,"Negative regulation of platelet aggregation "," http://amigo.geneontology.org/amigo/term/GO:0090331"," CD9"
0.147526344222752	1	9	319605263157895	Mitochondrial tRNA processing	http://amigo.geneontology.org/amigo/term/GO:0090646	HSD17B10	0.147526344222752,1,9,31.9605263157895,"Mitochondrial tRNA processing "," http://amigo.geneontology.org/amigo/term/GO:0090646"," HSD17B10"
0.147526344222752	2	78	737550607287449	Detoxification	http://amigo.geneontology.org/amigo/term/GO:0098754	ESD GSR	0.147526344222752,2,78,7.37550607287449,"Detoxification "," http://amigo.geneontology.org/amigo/term/GO:0098754"," ESD GSR"
0.147526344222752	1	9	319605263157895	Postsynaptic modulation of chemical synaptic transmission	http://amigo.geneontology.org/amigo/term/GO:0099170	PPP3R1	0.147526344222752,1,9,31.9605263157895,"Postsynaptic modulation of chemical synaptic transmission "," http://amigo.geneontology.org/amigo/term/GO:0099170"," PPP3R1"
0.147526344222752	1	9	319605263157895	Cellular response to aldehyde	http://amigo.geneontology.org/amigo/term/GO:0110096	ESD	0.147526344222752,1,9,31.9605263157895,"Cellular response to aldehyde "," http://amigo.geneontology.org/amigo/term/GO:0110096"," ESD"
0.147526344222752	6	677	254928865738941	Response to nitrogen compound	http://amigo.geneontology.org/amigo/term/GO:1901698	GRB2 PPP1R12A CD9 HADHA SGTA GABPA	0.147526344222752,6,677,2.54928865738941,"Response to nitrogen compound "," http://amigo.geneontology.org/amigo/term/GO:1901698"," GRB2 PPP1R12A CD9 HADHA SGTA GABPA"
0.147526344222752	1	9	319605263157895	Negative regulation of alcohol biosynthetic process	http://amigo.geneontology.org/amigo/term/GO:1902931	PLEK	0.147526344222752,1,9,31.9605263157895,"Negative regulation of alcohol biosynthetic process "," http://amigo.geneontology.org/amigo/term/GO:1902931"," PLEK"
0.147526344222752	1	9	319605263157895	Regulation of ER-associated ubiquitin-dependent protein catabolic process	http://amigo.geneontology.org/amigo/term/GO:1903069	SGTA	0.147526344222752,1,9,31.9605263157895,"Regulation of ER-associated ubiquitin-dependent protein catabolic process "," http://amigo.geneontology.org/amigo/term/GO:1903069"," SGTA"
0.147526344222752	1	9	319605263157895	Regulation of protein targeting to mitochondrion	http://amigo.geneontology.org/amigo/term/GO:1903214	PDCD5	0.147526344222752,1,9,31.9605263157895,"Regulation of protein targeting to mitochondrion "," http://amigo.geneontology.org/amigo/term/GO:1903214"," PDCD5"
0.147526344222752	1	9	319605263157895	Negative regulation of cAMP-dependent protein kinase activity	http://amigo.geneontology.org/amigo/term/GO:2000480	PRKAR2A	0.147526344222752,1,9,31.9605263157895,"Negative regulation of cAMP-dependent protein kinase activity "," http://amigo.geneontology.org/amigo/term/GO:2000480"," PRKAR2A"
0.147526344222752	2	77	747129186602871	Negative regulation of intrinsic apoptotic signaling pathway	http://amigo.geneontology.org/amigo/term/GO:2001243	ENO1 OPA1	0.147526344222752,2,77,7.47129186602871,"Negative regulation of intrinsic apoptotic signaling pathway "," http://amigo.geneontology.org/amigo/term/GO:2001243"," ENO1 OPA1"
0.147526344222752	1	9	319605263157895	Beta-catenin destruction complex	http://amigo.geneontology.org/amigo/term/GO:0030877	CACYBP	0.147526344222752,1,9,31.9605263157895,"Beta-catenin destruction complex "," http://amigo.geneontology.org/amigo/term/GO:0030877"," CACYBP"
0.147526344222752	2	78	737550607287449	Plasma membrane raft	http://amigo.geneontology.org/amigo/term/GO:0044853	KCNMA1 PRKAR2A	0.147526344222752,2,78,7.37550607287449,"Plasma membrane raft "," http://amigo.geneontology.org/amigo/term/GO:0044853"," KCNMA1 PRKAR2A"
0.147526344222752	1	9	319605263157895	Neurotrophin receptor binding	http://amigo.geneontology.org/amigo/term/GO:0005165	GRB2	0.147526344222752,1,9,31.9605263157895,"Neurotrophin receptor binding "," http://amigo.geneontology.org/amigo/term/GO:0005165"," GRB2"
0.147526344222752	1	9	319605263157895	CAMP-dependent protein kinase regulator activity	http://amigo.geneontology.org/amigo/term/GO:0008603	PRKAR2A	0.147526344222752,1,9,31.9605263157895,"CAMP-dependent protein kinase regulator activity "," http://amigo.geneontology.org/amigo/term/GO:0008603"," PRKAR2A"
0.147526344222752	1	9	319605263157895	Oxidoreductase activity, acting on a sulfur group of donors, NAD(P) as acceptor	http://amigo.geneontology.org/amigo/term/GO:0016668	GSR	0.147526344222752,1,9,31.9605263157895,"Oxidoreductase activity, acting on a sulfur group of donors, NAD(P) as acceptor "," http://amigo.geneontology.org/amigo/term/GO:0016668"," GSR"
0.147526344222752	2	77	747129186602871	Unfolded protein binding	http://amigo.geneontology.org/amigo/term/GO:0051082	CCT6A CCT2	0.147526344222752,2,77,7.47129186602871,"Unfolded protein binding "," http://amigo.geneontology.org/amigo/term/GO:0051082"," CCT6A CCT2"
0.147526344222752	1	9	319605263157895	P00025 Hedgehog signaling pathway	ftp://ftp.pantherdb.org/pathway/current_release	PRKAR2A	0.147526344222752,1,9,31.9605263157895,"P00025 Hedgehog signaling pathway","ftp://ftp.pantherdb.org/pathway/current_release"," PRKAR2A"
0.149353415398027	3	197	438037670317927	Protein targeting	http://amigo.geneontology.org/amigo/term/GO:0006605	YWHAZ PMPCB PDCD5	0.149353415398027,3,197,4.38037670317927,"Protein targeting "," http://amigo.geneontology.org/amigo/term/GO:0006605"," YWHAZ PMPCB PDCD5"
0.149353415398027	3	197	438037670317927	Bta-mir-214 target gene	https://www.mirnet.ca	ENO1 SGTA RASA3	0.149353415398027,3,197,4.38037670317927,"Bta-mir-214 target gene","https://www.mirnet.ca"," ENO1 SGTA RASA3"
0.149490320840619	2	80	719111842105263	Cargo recognition for clathrin-mediated endocytosis	https://reactome.org/download/current	GRB2 ARRB1	0.149490320840619,2,80,7.19111842105263,"Cargo recognition for clathrin-mediated endocytosis","https://reactome.org/download/current"," GRB2 ARRB1"
0.149490320840619	2	80	719111842105263	Ribonucleoside diphosphate metabolic process	http://amigo.geneontology.org/amigo/term/GO:0009185	ALDOA ENO1	0.149490320840619,2,80,7.19111842105263,"Ribonucleoside diphosphate metabolic process "," http://amigo.geneontology.org/amigo/term/GO:0009185"," ALDOA ENO1"
0.149490320840619	2	80	719111842105263	Protein localization to chromosome	http://amigo.geneontology.org/amigo/term/GO:0034502	CCT6A CCT2	0.149490320840619,2,80,7.19111842105263,"Protein localization to chromosome "," http://amigo.geneontology.org/amigo/term/GO:0034502"," CCT6A CCT2"
0.149490320840619	2	80	719111842105263	Regulation of DNA biosynthetic process	http://amigo.geneontology.org/amigo/term/GO:2000278	CCT6A CCT2	0.149490320840619,2,80,7.19111842105263,"Regulation of DNA biosynthetic process "," http://amigo.geneontology.org/amigo/term/GO:2000278"," CCT6A CCT2"
0.149490320840619	2	80	719111842105263	ECM-receptor interaction	http://www.genome.jp/kegg-bin/show_pathway?bta04512	ITGA2B VWF	0.149490320840619,2,80,7.19111842105263,"ECM-receptor interaction","http://www.genome.jp/kegg-bin/show_pathway?bta04512 "," ITGA2B VWF"
0.151640999966712	3	199	433635281671515	Extracellular matrix organization	https://reactome.org/download/current	ITGA2B PPIB CRELD2	0.151640999966712,3,199,4.33635281671515,"Extracellular matrix organization","https://reactome.org/download/current"," ITGA2B PPIB CRELD2"
0.151888336299742	2	81	710233918128655	Lipid oxidation	http://amigo.geneontology.org/amigo/term/GO:0034440	HADHA HSD17B10	0.151888336299742,2,81,7.10233918128655,"Lipid oxidation "," http://amigo.geneontology.org/amigo/term/GO:0034440"," HADHA HSD17B10"
0.151888336299742	2	81	710233918128655	Neutrophil migration	http://amigo.geneontology.org/amigo/term/GO:1990266	MCU PPIB	0.151888336299742,2,81,7.10233918128655,"Neutrophil migration "," http://amigo.geneontology.org/amigo/term/GO:1990266"," MCU PPIB"
0.151888336299742	2	81	710233918128655	Voltage-gated potassium channel activity	http://amigo.geneontology.org/amigo/term/GO:0005249	KCNA10 KCNMA1	0.151888336299742,2,81,7.10233918128655,"Voltage-gated potassium channel activity "," http://amigo.geneontology.org/amigo/term/GO:0005249"," KCNA10 KCNMA1"
0.151951969023871	6	688	250852968176255	Oxoacid metabolic process	http://amigo.geneontology.org/amigo/term/GO:0043436	OGDH ALDOA ENO1 IDH2 HADHA HSD17B10	0.151951969023871,6,688,2.50852968176255,"Oxoacid metabolic process "," http://amigo.geneontology.org/amigo/term/GO:0043436"," OGDH ALDOA ENO1 IDH2 HADHA HSD17B10"
0.152215390099089	2	82	701572528883183	Cellular response to heat stress	https://reactome.org/download/current	SEH1L HSPA1A	0.152215390099089,2,82,7.01572528883183,"Cellular response to heat stress","https://reactome.org/download/current"," SEH1L HSPA1A"
0.152215390099089	1	10	287644736842105	SEMA3A-Plexin repulsion signaling by inhibiting Integrin adhesion	https://reactome.org/download/current	TLN1	0.152215390099089,1,10,28.7644736842105,"SEMA3A-Plexin repulsion signaling by inhibiting Integrin adhesion","https://reactome.org/download/current"," TLN1"
0.152215390099089	1	10	287644736842105	GRB2 events in EGFR signaling	https://reactome.org/download/current	GRB2	0.152215390099089,1,10,28.7644736842105,"GRB2 events in EGFR signaling","https://reactome.org/download/current"," GRB2"
0.152215390099089	1	10	287644736842105	Role of LAT2/NTAL/LAB on calcium mobilization	https://reactome.org/download/current	GRB2	0.152215390099089,1,10,28.7644736842105,"Role of LAT2/NTAL/LAB on calcium mobilization","https://reactome.org/download/current"," GRB2"
0.152215390099089	1	10	287644736842105	Interleukin-15 signaling	https://reactome.org/download/current	GRB2	0.152215390099089,1,10,28.7644736842105,"Interleukin-15 signaling","https://reactome.org/download/current"," GRB2"
0.152215390099089	1	10	287644736842105	Glucose catabolic process	http://amigo.geneontology.org/amigo/term/GO:0006007	ENO1	0.152215390099089,1,10,28.7644736842105,"Glucose catabolic process "," http://amigo.geneontology.org/amigo/term/GO:0006007"," ENO1"
0.152215390099089	2	83	693119847812302	Nucleoside diphosphate phosphorylation	http://amigo.geneontology.org/amigo/term/GO:0006165	ALDOA ENO1	0.152215390099089,2,83,6.93119847812302,"Nucleoside diphosphate phosphorylation "," http://amigo.geneontology.org/amigo/term/GO:0006165"," ALDOA ENO1"
0.152215390099089	3	201	429320502749411	Nucleotide biosynthetic process	http://amigo.geneontology.org/amigo/term/GO:0009165	GART ALDOA ENO1	0.152215390099089,3,201,4.29320502749411,"Nucleotide biosynthetic process "," http://amigo.geneontology.org/amigo/term/GO:0009165"," GART ALDOA ENO1"
0.152215390099089	1	10	287644736842105	Positive regulation of actin filament depolymerization	http://amigo.geneontology.org/amigo/term/GO:0030836	PLEK	0.152215390099089,1,10,28.7644736842105,"Positive regulation of actin filament depolymerization "," http://amigo.geneontology.org/amigo/term/GO:0030836"," PLEK"
0.152215390099089	1	10	287644736842105	Iron import into cell	http://amigo.geneontology.org/amigo/term/GO:0033212	NOX5	0.152215390099089,1,10,28.7644736842105,"Iron import into cell "," http://amigo.geneontology.org/amigo/term/GO:0033212"," NOX5"
0.152215390099089	1	10	287644736842105	Negative regulation of homotypic cell-cell adhesion	http://amigo.geneontology.org/amigo/term/GO:0034111	CD9	0.152215390099089,1,10,28.7644736842105,"Negative regulation of homotypic cell-cell adhesion "," http://amigo.geneontology.org/amigo/term/GO:0034111"," CD9"
0.152215390099089	1	10	287644736842105	Vesicle targeting, rough ER to cis-Golgi	http://amigo.geneontology.org/amigo/term/GO:0048207	TFG	0.152215390099089,1,10,28.7644736842105,"Vesicle targeting, rough ER to cis-Golgi "," http://amigo.geneontology.org/amigo/term/GO:0048207"," TFG"
0.152215390099089	1	10	287644736842105	COPII vesicle coating	http://amigo.geneontology.org/amigo/term/GO:0048208	TFG	0.152215390099089,1,10,28.7644736842105,"COPII vesicle coating "," http://amigo.geneontology.org/amigo/term/GO:0048208"," TFG"
0.152215390099089	1	10	287644736842105	Regulation of lipoprotein metabolic process	http://amigo.geneontology.org/amigo/term/GO:0050746	RAB3GAP1	0.152215390099089,1,10,28.7644736842105,"Regulation of lipoprotein metabolic process "," http://amigo.geneontology.org/amigo/term/GO:0050746"," RAB3GAP1"
0.152215390099089	1	10	287644736842105	Positive regulation of mitochondrial calcium ion concentration	http://amigo.geneontology.org/amigo/term/GO:0051561	MCU	0.152215390099089,1,10,28.7644736842105,"Positive regulation of mitochondrial calcium ion concentration "," http://amigo.geneontology.org/amigo/term/GO:0051561"," MCU"
0.152215390099089	1	10	287644736842105	Cellular response to low-density lipoprotein particle stimulus	http://amigo.geneontology.org/amigo/term/GO:0071404	CD9	0.152215390099089,1,10,28.7644736842105,"Cellular response to low-density lipoprotein particle stimulus "," http://amigo.geneontology.org/amigo/term/GO:0071404"," CD9"
0.152215390099089	1	10	287644736842105	Membrane fission	http://amigo.geneontology.org/amigo/term/GO:0090148	OPA1	0.152215390099089,1,10,28.7644736842105,"Membrane fission "," http://amigo.geneontology.org/amigo/term/GO:0090148"," OPA1"
0.152215390099089	6	693	249043062200957	Inorganic ion transmembrane transport	http://amigo.geneontology.org/amigo/term/GO:0098660	MCU KCNA10 NOX5 KCNMA1 ATP6V1D F2RL3	0.152215390099089,6,693,2.49043062200957,"Inorganic ion transmembrane transport "," http://amigo.geneontology.org/amigo/term/GO:0098660"," MCU KCNA10 NOX5 KCNMA1 ATP6V1D F2RL3"
0.152215390099089	1	10	287644736842105	Postsynaptic neurotransmitter receptor internalization	http://amigo.geneontology.org/amigo/term/GO:0098884	PPP3R1	0.152215390099089,1,10,28.7644736842105,"Postsynaptic neurotransmitter receptor internalization "," http://amigo.geneontology.org/amigo/term/GO:0098884"," PPP3R1"
0.152215390099089	1	10	287644736842105	Postsynaptic endocytosis	http://amigo.geneontology.org/amigo/term/GO:0140239	PPP3R1	0.152215390099089,1,10,28.7644736842105,"Postsynaptic endocytosis "," http://amigo.geneontology.org/amigo/term/GO:0140239"," PPP3R1"
0.152215390099089	1	10	287644736842105	Nuclear envelope lumen	http://amigo.geneontology.org/amigo/term/GO:0005641	CACYBP	0.152215390099089,1,10,28.7644736842105,"Nuclear envelope lumen "," http://amigo.geneontology.org/amigo/term/GO:0005641"," CACYBP"
0.152215390099089	3	203	425090744101633	Secretory granule	http://amigo.geneontology.org/amigo/term/GO:0030141	VWF RAB27A SYPL1	0.152215390099089,3,203,4.25090744101633,"Secretory granule "," http://amigo.geneontology.org/amigo/term/GO:0030141"," VWF RAB27A SYPL1"
0.152215390099089	1	10	287644736842105	Nuclear pore outer ring	http://amigo.geneontology.org/amigo/term/GO:0031080	SEH1L	0.152215390099089,1,10,28.7644736842105,"Nuclear pore outer ring "," http://amigo.geneontology.org/amigo/term/GO:0031080"," SEH1L"
0.152215390099089	1	10	287644736842105	Tricarboxylic acid cycle enzyme complex	http://amigo.geneontology.org/amigo/term/GO:0045239	OGDH	0.152215390099089,1,10,28.7644736842105,"Tricarboxylic acid cycle enzyme complex "," http://amigo.geneontology.org/amigo/term/GO:0045239"," OGDH"
0.152215390099089	1	10	287644736842105	Parallel fiber to Purkinje cell synapse	http://amigo.geneontology.org/amigo/term/GO:0098688	PPP3R1	0.152215390099089,1,10,28.7644736842105,"Parallel fiber to Purkinje cell synapse "," http://amigo.geneontology.org/amigo/term/GO:0098688"," PPP3R1"
0.152215390099089	1	10	287644736842105	Estradiol 17-beta-dehydrogenase activity	http://amigo.geneontology.org/amigo/term/GO:0004303	HSD17B10	0.152215390099089,1,10,28.7644736842105,"Estradiol 17-beta-dehydrogenase activity "," http://amigo.geneontology.org/amigo/term/GO:0004303"," HSD17B10"
0.152215390099089	1	10	287644736842105	Insulin-like growth factor receptor binding	http://amigo.geneontology.org/amigo/term/GO:0005159	ARRB1	0.152215390099089,1,10,28.7644736842105,"Insulin-like growth factor receptor binding "," http://amigo.geneontology.org/amigo/term/GO:0005159"," ARRB1"
0.152215390099089	1	10	287644736842105	Vinculin binding	http://amigo.geneontology.org/amigo/term/GO:0017166	TLN1	0.152215390099089,1,10,28.7644736842105,"Vinculin binding "," http://amigo.geneontology.org/amigo/term/GO:0017166"," TLN1"
0.152215390099089	1	10	287644736842105	Phosphatidylglycerol binding	http://amigo.geneontology.org/amigo/term/GO:1901611	OPA1	0.152215390099089,1,10,28.7644736842105,"Phosphatidylglycerol binding "," http://amigo.geneontology.org/amigo/term/GO:1901611"," OPA1"
0.152215390099089	4	350	328736842105263	PI3K-Akt signaling pathway	http://www.genome.jp/kegg-bin/show_pathway?bta04151	YWHAZ GRB2 ITGA2B VWF	0.152215390099089,4,350,3.28736842105263,"PI3K-Akt signaling pathway","http://www.genome.jp/kegg-bin/show_pathway?bta04151 "," YWHAZ GRB2 ITGA2B VWF"
0.152215390099089	3	200	431467105263158	Viral carcinogenesis	http://www.genome.jp/kegg-bin/show_pathway?bta05203	YWHAZ GRB2 GSN	0.152215390099089,3,200,4.31467105263158,"Viral carcinogenesis","http://www.genome.jp/kegg-bin/show_pathway?bta05203 "," YWHAZ GRB2 GSN"
0.15316000419608	2	84	684868421052632	Positive regulation of actin filament polymerization	http://amigo.geneontology.org/amigo/term/GO:0030838	GRB2 GSN	0.15316000419608,2,84,6.84868421052632,"Positive regulation of actin filament polymerization "," http://amigo.geneontology.org/amigo/term/GO:0030838"," GRB2 GSN"
0.15316000419608	2	84	684868421052632	Nucleotide phosphorylation	http://amigo.geneontology.org/amigo/term/GO:0046939	ALDOA ENO1	0.15316000419608,2,84,6.84868421052632,"Nucleotide phosphorylation "," http://amigo.geneontology.org/amigo/term/GO:0046939"," ALDOA ENO1"
0.15316000419608	2	84	684868421052632	Bta-mir-2388-5p target gene	https://www.mirnet.ca	COTL1 RASA3	0.15316000419608,2,84,6.84868421052632,"Bta-mir-2388-5p target gene","https://www.mirnet.ca"," COTL1 RASA3"
0.153160675292155	3	205	42094351732991	Nucleoside phosphate biosynthetic process	http://amigo.geneontology.org/amigo/term/GO:1901293	GART ALDOA ENO1	0.153160675292155,3,205,4.2094351732991,"Nucleoside phosphate biosynthetic process "," http://amigo.geneontology.org/amigo/term/GO:1901293"," GART ALDOA ENO1"
0.154796418210015	3	206	418900102197241	Rap1 signaling pathway	http://www.genome.jp/kegg-bin/show_pathway?bta04015	ITGA2B TLN1 F2RL3	0.154796418210015,3,206,4.18900102197241,"Rap1 signaling pathway","http://www.genome.jp/kegg-bin/show_pathway?bta04015 "," ITGA2B TLN1 F2RL3"
0.155173547895875	10	1509	190619441247253	Metabolism	https://reactome.org/download/current	ESD CPNE1 GSR GART ALDOA ENO1 IDH2 PRKAR2A HADHA HSD17B10	0.155173547895875,10,1509,1.90619441247253,"Metabolism","https://reactome.org/download/current"," ESD CPNE1 GSR GART ALDOA ENO1 IDH2 PRKAR2A HADHA HSD17B10"
0.155173547895875	2	86	668941248470012	Metabolism of nucleotides	https://reactome.org/download/current	GSR GART	0.155173547895875,2,86,6.68941248470012,"Metabolism of nucleotides","https://reactome.org/download/current"," GSR GART"
0.155173547895875	1	11	261495215311005	Chk1/Chk2Cds1 mediated inactivation of Cyclin B:Cdk1 complex	https://reactome.org/download/current	YWHAZ	0.155173547895875,1,11,26.1495215311005,"Chk1/Chk2Cds1 mediated inactivation of Cyclin B:Cdk1 complex","https://reactome.org/download/current"," YWHAZ"
0.155173547895875	1	11	261495215311005	SHC1 events in EGFR signaling	https://reactome.org/download/current	GRB2	0.155173547895875,1,11,26.1495215311005,"SHC1 events in EGFR signaling","https://reactome.org/download/current"," GRB2"
0.155173547895875	1	11	261495215311005	Signaling by NTRK2 TRKB	https://reactome.org/download/current	GRB2	0.155173547895875,1,11,26.1495215311005,"Signaling by NTRK2 TRKB","https://reactome.org/download/current"," GRB2"
0.155173547895875	2	88	653738038277512	WP3231 Senescence and Autophagy in Cancer	http://www.wikipathways.org/instance/WP3231_r81192	GSN SERPINB2	0.155173547895875,2,88,6.53738038277512,"WP3231 Senescence and Autophagy in Cancer","http://www.wikipathways.org/instance/WP3231_r81192"," GSN SERPINB2"
0.155173547895875	1	11	261495215311005	Processing of SMDT1	https://reactome.org/download/current	MCU	0.155173547895875,1,11,26.1495215311005,"Processing of SMDT1","https://reactome.org/download/current"," MCU"
0.155173547895875	1	11	261495215311005	Desensitization of G protein-coupled receptor signaling pathway	http://amigo.geneontology.org/amigo/term/GO:0002029	ARRB1	0.155173547895875,1,11,26.1495215311005,"Desensitization of G protein-coupled receptor signaling pathway "," http://amigo.geneontology.org/amigo/term/GO:0002029"," ARRB1"
0.155173547895875	1	11	261495215311005	SHC1 events in ERBB4 signaling	https://reactome.org/download/current	GRB2	0.155173547895875,1,11,26.1495215311005,"SHC1 events in ERBB4 signaling","https://reactome.org/download/current"," GRB2"
0.155173547895875	1	11	261495215311005	GRB2 events in ERBB2 signaling	https://reactome.org/download/current	GRB2	0.155173547895875,1,11,26.1495215311005,"GRB2 events in ERBB2 signaling","https://reactome.org/download/current"," GRB2"
0.155173547895875	6	712	242397250147842	Organic acid metabolic process	http://amigo.geneontology.org/amigo/term/GO:0006082	OGDH ALDOA ENO1 IDH2 HADHA HSD17B10	0.155173547895875,6,712,2.42397250147842,"Organic acid metabolic process "," http://amigo.geneontology.org/amigo/term/GO:0006082"," OGDH ALDOA ENO1 IDH2 HADHA HSD17B10"
0.155173547895875	2	85	676811145510836	Pyruvate metabolic process	http://amigo.geneontology.org/amigo/term/GO:0006090	ALDOA ENO1	0.155173547895875,2,85,6.76811145510836,"Pyruvate metabolic process "," http://amigo.geneontology.org/amigo/term/GO:0006090"," ALDOA ENO1"
0.155173547895875	1	11	261495215311005	NADH metabolic process	http://amigo.geneontology.org/amigo/term/GO:0006734	ENO1	0.155173547895875,1,11,26.1495215311005,"NADH metabolic process "," http://amigo.geneontology.org/amigo/term/GO:0006734"," ENO1"
0.155173547895875	4	358	321390767421347	Small GTPase mediated signal transduction	http://amigo.geneontology.org/amigo/term/GO:0007264	MAPRE2 RASA3 ARRB1 F2RL3	0.155173547895875,4,358,3.21390767421347,"Small GTPase mediated signal transduction "," http://amigo.geneontology.org/amigo/term/GO:0007264"," MAPRE2 RASA3 ARRB1 F2RL3"
0.155173547895875	2	88	653738038277512	Ensheathment of neurons	http://amigo.geneontology.org/amigo/term/GO:0007272	PPP3R1 CD9	0.155173547895875,2,88,6.53738038277512,"Ensheathment of neurons "," http://amigo.geneontology.org/amigo/term/GO:0007272"," PPP3R1 CD9"
0.155173547895875	2	88	653738038277512	Axon ensheathment	http://amigo.geneontology.org/amigo/term/GO:0008366	PPP3R1 CD9	0.155173547895875,2,88,6.53738038277512,"Axon ensheathment "," http://amigo.geneontology.org/amigo/term/GO:0008366"," PPP3R1 CD9"
0.155173547895875	8	1099	209386523633926	Regulation of cell death	http://amigo.geneontology.org/amigo/term/GO:0010941	YWHAZ ACTC1 PDCD5 KCNMA1 ENO1 HIPK3 OPA1 SERPINB2	0.155173547895875,8,1099,2.09386523633926,"Regulation of cell death "," http://amigo.geneontology.org/amigo/term/GO:0010941"," YWHAZ ACTC1 PDCD5 KCNMA1 ENO1 HIPK3 OPA1 SERPINB2"
0.155173547895875	1	11	261495215311005	Purine ribonucleoside monophosphate biosynthesis	https://reactome.org/download/current	GART	0.155173547895875,1,11,26.1495215311005,"Purine ribonucleoside monophosphate biosynthesis","https://reactome.org/download/current"," GART"
0.155173547895875	1	11	261495215311005	Negative adaptation of signaling pathway	http://amigo.geneontology.org/amigo/term/GO:0022401	ARRB1	0.155173547895875,1,11,26.1495215311005,"Negative adaptation of signaling pathway "," http://amigo.geneontology.org/amigo/term/GO:0022401"," ARRB1"
0.155173547895875	1	11	261495215311005	Positive regulation of nucleotide biosynthetic process	http://amigo.geneontology.org/amigo/term/GO:0030810	ENO1	0.155173547895875,1,11,26.1495215311005,"Positive regulation of nucleotide biosynthetic process "," http://amigo.geneontology.org/amigo/term/GO:0030810"," ENO1"
0.155173547895875	12	1946	177375993941689	Regulation of localization	http://amigo.geneontology.org/amigo/term/GO:0032879	MCU MAPRE2 CCT6A KCNA10 PDCD5 PPP3R1 RAB27A PPP1R12A CD9 CCT2 ARRB1 F2RL3	0.155173547895875,12,1946,1.77375993941689,"Regulation of localization "," http://amigo.geneontology.org/amigo/term/GO:0032879"," MCU MAPRE2 CCT6A KCNA10 PDCD5 PPP3R1 RAB27A PPP1R12A CD9 CCT2 ARRB1 F2RL3"
0.155173547895875	9	1297	199599277685347	Cellular protein localization	http://amigo.geneontology.org/amigo/term/GO:0034613	YWHAZ PMPCB CCT6A PDCD5 PPP3R1 SEH1L RAB3GAP1 SGTA CCT2	0.155173547895875,9,1297,1.99599277685347,"Cellular protein localization "," http://amigo.geneontology.org/amigo/term/GO:0034613"," YWHAZ PMPCB CCT6A PDCD5 PPP3R1 SEH1L RAB3GAP1 SGTA CCT2"
0.155173547895875	3	210	410921052631579	Response to endoplasmic reticulum stress	http://amigo.geneontology.org/amigo/term/GO:0034976	SGTA OPA1 MANF	0.155173547895875,3,210,4.10921052631579,"Response to endoplasmic reticulum stress "," http://amigo.geneontology.org/amigo/term/GO:0034976"," SGTA OPA1 MANF"
0.155173547895875	2	86	668941248470012	Myelination	http://amigo.geneontology.org/amigo/term/GO:0042552	PPP3R1 CD9	0.155173547895875,2,86,6.68941248470012,"Myelination "," http://amigo.geneontology.org/amigo/term/GO:0042552"," PPP3R1 CD9"
0.155173547895875	3	207	41687643020595	Response to peptide hormone	http://amigo.geneontology.org/amigo/term/GO:0043434	GRB2 PPP1R12A HADHA	0.155173547895875,3,207,4.1687643020595,"Response to peptide hormone "," http://amigo.geneontology.org/amigo/term/GO:0043434"," GRB2 PPP1R12A HADHA"
0.155173547895875	1	11	261495215311005	Positive regulation of vacuole organization	http://amigo.geneontology.org/amigo/term/GO:0044090	RAB3GAP1	0.155173547895875,1,11,26.1495215311005,"Positive regulation of vacuole organization "," http://amigo.geneontology.org/amigo/term/GO:0044090"," RAB3GAP1"
0.155173547895875	1	11	261495215311005	Positive regulation by host of viral process	http://amigo.geneontology.org/amigo/term/GO:0044794	PPIB	0.155173547895875,1,11,26.1495215311005,"Positive regulation by host of viral process "," http://amigo.geneontology.org/amigo/term/GO:0044794"," PPIB"
0.155173547895875	1	11	261495215311005	Aldehyde catabolic process	http://amigo.geneontology.org/amigo/term/GO:0046185	ESD	0.155173547895875,1,11,26.1495215311005,"Aldehyde catabolic process "," http://amigo.geneontology.org/amigo/term/GO:0046185"," ESD"
0.155173547895875	1	11	261495215311005	Actin filament severing	http://amigo.geneontology.org/amigo/term/GO:0051014	GSN	0.155173547895875,1,11,26.1495215311005,"Actin filament severing "," http://amigo.geneontology.org/amigo/term/GO:0051014"," GSN"
0.155173547895875	9	1303	198680171264693	Cellular macromolecule localization	http://amigo.geneontology.org/amigo/term/GO:0070727	YWHAZ PMPCB CCT6A PDCD5 PPP3R1 SEH1L RAB3GAP1 SGTA CCT2	0.155173547895875,9,1303,1.98680171264693,"Cellular macromolecule localization "," http://amigo.geneontology.org/amigo/term/GO:0070727"," YWHAZ PMPCB CCT6A PDCD5 PPP3R1 SEH1L RAB3GAP1 SGTA CCT2"
0.155173547895875	2	85	676811145510836	Granulocyte chemotaxis	http://amigo.geneontology.org/amigo/term/GO:0071621	MCU PPIB	0.155173547895875,2,85,6.76811145510836,"Granulocyte chemotaxis "," http://amigo.geneontology.org/amigo/term/GO:0071621"," MCU PPIB"
0.155173547895875	2	85	676811145510836	Monocarboxylic acid catabolic process	http://amigo.geneontology.org/amigo/term/GO:0072329	HADHA HSD17B10	0.155173547895875,2,85,6.76811145510836,"Monocarboxylic acid catabolic process "," http://amigo.geneontology.org/amigo/term/GO:0072329"," HADHA HSD17B10"
0.155173547895875	1	11	261495215311005	Positive regulation of purine nucleotide biosynthetic process	http://amigo.geneontology.org/amigo/term/GO:1900373	ENO1	0.155173547895875,1,11,26.1495215311005,"Positive regulation of purine nucleotide biosynthetic process "," http://amigo.geneontology.org/amigo/term/GO:1900373"," ENO1"
0.155173547895875	1	11	261495215311005	Regulation of establishment of protein localization to mitochondrion	http://amigo.geneontology.org/amigo/term/GO:1903747	PDCD5	0.155173547895875,1,11,26.1495215311005,"Regulation of establishment of protein localization to mitochondrion "," http://amigo.geneontology.org/amigo/term/GO:1903747"," PDCD5"
0.155173547895875	1	11	261495215311005	Regulation of ATP biosynthetic process	http://amigo.geneontology.org/amigo/term/GO:2001169	ENO1	0.155173547895875,1,11,26.1495215311005,"Regulation of ATP biosynthetic process "," http://amigo.geneontology.org/amigo/term/GO:2001169"," ENO1"
0.155173547895875	2	87	661252268602541	U2-type spliceosomal complex	http://amigo.geneontology.org/amigo/term/GO:0005684	SNRNP40 PRPF40A	0.155173547895875,2,87,6.61252268602541,"U2-type spliceosomal complex "," http://amigo.geneontology.org/amigo/term/GO:0005684"," SNRNP40 PRPF40A"
0.155173547895875	1	11	261495215311005	GATOR2 complex	http://amigo.geneontology.org/amigo/term/GO:0061700	SEH1L	0.155173547895875,1,11,26.1495215311005,"GATOR2 complex "," http://amigo.geneontology.org/amigo/term/GO:0061700"," SEH1L"
0.155173547895875	1	11	261495215311005	Calcium-activated potassium channel activity	http://amigo.geneontology.org/amigo/term/GO:0015269	KCNMA1	0.155173547895875,1,11,26.1495215311005,"Calcium-activated potassium channel activity "," http://amigo.geneontology.org/amigo/term/GO:0015269"," KCNMA1"
0.155173547895875	6	708	243766726137377	Inorganic molecular entity transmembrane transporter activity	http://amigo.geneontology.org/amigo/term/GO:0015318	MCU KCNA10 NOX5 KCNMA1 CLIC1 ATP6V1D	0.155173547895875,6,708,2.43766726137377,"Inorganic molecular entity transmembrane transporter activity "," http://amigo.geneontology.org/amigo/term/GO:0015318"," MCU KCNA10 NOX5 KCNMA1 CLIC1 ATP6V1D"
0.155173547895875	1	11	261495215311005	Superoxide-generating NAD(P)H oxidase activity	http://amigo.geneontology.org/amigo/term/GO:0016175	NOX5	0.155173547895875,1,11,26.1495215311005,"Superoxide-generating NAD(P)H oxidase activity "," http://amigo.geneontology.org/amigo/term/GO:0016175"," NOX5"
0.155173547895875	1	11	261495215311005	Protein kinase A catalytic subunit binding	http://amigo.geneontology.org/amigo/term/GO:0034236	PRKAR2A	0.155173547895875,1,11,26.1495215311005,"Protein kinase A catalytic subunit binding "," http://amigo.geneontology.org/amigo/term/GO:0034236"," PRKAR2A"
0.155173547895875	3	211	408973559491145	Cell adhesion molecule binding	http://amigo.geneontology.org/amigo/term/GO:0050839	VWF CD9 TLN1	0.155173547895875,3,211,4.08973559491145,"Cell adhesion molecule binding "," http://amigo.geneontology.org/amigo/term/GO:0050839"," VWF CD9 TLN1"
0.155173547895875	2	87	661252268602541	Gap junction	http://www.genome.jp/kegg-bin/show_pathway?bta04540	GRB2 TUBA4A	0.155173547895875,2,87,6.61252268602541,"Gap junction","http://www.genome.jp/kegg-bin/show_pathway?bta04540 "," GRB2 TUBA4A"
0.155173547895875	2	88	653738038277512	Hypertrophic cardiomyopathy	http://www.genome.jp/kegg-bin/show_pathway?bta05410	ACTC1 ITGA2B	0.155173547895875,2,88,6.53738038277512,"Hypertrophic cardiomyopathy","http://www.genome.jp/kegg-bin/show_pathway?bta05410 "," ACTC1 ITGA2B"
0.156232321048368	11	1743	181531388712746	Protein localization	http://amigo.geneontology.org/amigo/term/GO:0008104	YWHAZ MCU PMPCB CCT6A PDCD5 PLEK PPP3R1 SEH1L RAB3GAP1 SGTA CCT2	0.156232321048368,11,1743,1.81531388712746,"Protein localization "," http://amigo.geneontology.org/amigo/term/GO:0008104"," YWHAZ MCU PMPCB CCT6A PDCD5 PLEK PPP3R1 SEH1L RAB3GAP1 SGTA CCT2"
0.156232321048368	5	533	269835588031994	Nucleoside-triphosphatase activity	http://amigo.geneontology.org/amigo/term/GO:0017111	CCT6A RAB27A CCT2 OPA1 TUBA4A	0.156232321048368,5,533,2.69835588031994,"Nucleoside-triphosphatase activity "," http://amigo.geneontology.org/amigo/term/GO:0017111"," CCT6A RAB27A CCT2 OPA1 TUBA4A"
0.157205496977675	10	1528	188249173325985	Metabolic pathways	http://www.genome.jp/kegg-bin/show_pathway?bta01100	ESD OGDH GSR GART ALDOA ENO1 IDH2 HADHA ATP6V1D HSD17B10	0.157205496977675,10,1528,1.88249173325985,"Metabolic pathways","http://www.genome.jp/kegg-bin/show_pathway?bta01100 "," ESD OGDH GSR GART ALDOA ENO1 IDH2 HADHA ATP6V1D HSD17B10"
0.157443345329617	2	89	646392667060911	Viral genome replication	http://amigo.geneontology.org/amigo/term/GO:0019079	PPIB OAS1Z	0.157443345329617,2,89,6.46392667060911,"Viral genome replication "," http://amigo.geneontology.org/amigo/term/GO:0019079"," PPIB OAS1Z"
0.158717940870146	5	536	268325314218382	Positive regulation of transport	http://amigo.geneontology.org/amigo/term/GO:0051050	MCU PDCD5 RAB27A ARRB1 F2RL3	0.158717940870146,5,536,2.68325314218382,"Positive regulation of transport "," http://amigo.geneontology.org/amigo/term/GO:0051050"," MCU PDCD5 RAB27A ARRB1 F2RL3"
0.159203553807789	3	215	401364749082007	Regulation of protein stability	http://amigo.geneontology.org/amigo/term/GO:0031647	CCT6A PPIB CCT2	0.159203553807789,3,215,4.01364749082007,"Regulation of protein stability "," http://amigo.geneontology.org/amigo/term/GO:0031647"," CCT6A PPIB CCT2"
0.159203553807789	4	367	313509249964147	Bta-mir-2453 target gene	https://www.mirnet.ca	MYL9 RASA3 MANF KRT78	0.159203553807789,4,367,3.13509249964147,"Bta-mir-2453 target gene","https://www.mirnet.ca"," MYL9 RASA3 MANF KRT78"
0.16122118075556	5	539	266831852358168	Regulation of cellular localization	http://amigo.geneontology.org/amigo/term/GO:0060341	CCT6A PDCD5 PPP1R12A CCT2 F2RL3	0.16122118075556,5,539,2.66831852358168,"Regulation of cellular localization "," http://amigo.geneontology.org/amigo/term/GO:0060341"," CCT6A PDCD5 PPP1R12A CCT2 F2RL3"
0.161343733603521	1	12	239703947368421	KSRP KHSRP binds and destabilizes mRNA	https://reactome.org/download/current	YWHAZ	0.161343733603521,1,12,23.9703947368421,"KSRP KHSRP binds and destabilizes mRNA","https://reactome.org/download/current"," YWHAZ"
0.161343733603521	1	12	239703947368421	DARPP-32 events	https://reactome.org/download/current	PRKAR2A	0.161343733603521,1,12,23.9703947368421,"DARPP-32 events","https://reactome.org/download/current"," PRKAR2A"
0.161343733603521	2	91	632186234817814	Golgi-to-ER retrograde transport	https://reactome.org/download/current	RAB3GAP1 TUBA4A	0.161343733603521,2,91,6.32186234817814,"Golgi-to-ER retrograde transport","https://reactome.org/download/current"," RAB3GAP1 TUBA4A"
0.161343733603521	1	12	239703947368421	PI3K events in ERBB2 signaling	https://reactome.org/download/current	GRB2	0.161343733603521,1,12,23.9703947368421,"PI3K events in ERBB2 signaling","https://reactome.org/download/current"," GRB2"
0.161343733603521	1	12	239703947368421	Mitochondrial calcium ion transport	https://reactome.org/download/current	MCU	0.161343733603521,1,12,23.9703947368421,"Mitochondrial calcium ion transport","https://reactome.org/download/current"," MCU"
0.161343733603521	1	12	239703947368421	Signalling to RAS	https://reactome.org/download/current	GRB2	0.161343733603521,1,12,23.9703947368421,"Signalling to RAS","https://reactome.org/download/current"," GRB2"
0.161343733603521	1	12	239703947368421	Negative regulation of platelet activation	http://amigo.geneontology.org/amigo/term/GO:0010544	CD9	0.161343733603521,1,12,23.9703947368421,"Negative regulation of platelet activation "," http://amigo.geneontology.org/amigo/term/GO:0010544"," CD9"
0.161343733603521	1	12	239703947368421	Striatum development	http://amigo.geneontology.org/amigo/term/GO:0021756	OGDH	0.161343733603521,1,12,23.9703947368421,"Striatum development "," http://amigo.geneontology.org/amigo/term/GO:0021756"," OGDH"
0.161343733603521	1	12	239703947368421	Hypothalamus development	http://amigo.geneontology.org/amigo/term/GO:0021854	RAB3GAP1	0.161343733603521,1,12,23.9703947368421,"Hypothalamus development "," http://amigo.geneontology.org/amigo/term/GO:0021854"," RAB3GAP1"
0.161343733603521	1	12	239703947368421	Cellular potassium ion homeostasis	http://amigo.geneontology.org/amigo/term/GO:0030007	KCNMA1	0.161343733603521,1,12,23.9703947368421,"Cellular potassium ion homeostasis "," http://amigo.geneontology.org/amigo/term/GO:0030007"," KCNMA1"
0.161343733603521	1	12	239703947368421	Myelin assembly	http://amigo.geneontology.org/amigo/term/GO:0032288	CD9	0.161343733603521,1,12,23.9703947368421,"Myelin assembly "," http://amigo.geneontology.org/amigo/term/GO:0032288"," CD9"
0.161343733603521	1	12	239703947368421	Melanosome transport	http://amigo.geneontology.org/amigo/term/GO:0032402	RAB27A	0.161343733603521,1,12,23.9703947368421,"Melanosome transport "," http://amigo.geneontology.org/amigo/term/GO:0032402"," RAB27A"
0.161343733603521	1	12	239703947368421	Positive regulation of phosphoprotein phosphatase activity	http://amigo.geneontology.org/amigo/term/GO:0032516	PPP1R12A	0.161343733603521,1,12,23.9703947368421,"Positive regulation of phosphoprotein phosphatase activity "," http://amigo.geneontology.org/amigo/term/GO:0032516"," PPP1R12A"
0.161343733603521	1	12	239703947368421	Negative regulation of interleukin-8 production	http://amigo.geneontology.org/amigo/term/GO:0032717	ARRB1	0.161343733603521,1,12,23.9703947368421,"Negative regulation of interleukin-8 production "," http://amigo.geneontology.org/amigo/term/GO:0032717"," ARRB1"
0.161343733603521	1	12	239703947368421	Calcium import into the mitochondrion	http://amigo.geneontology.org/amigo/term/GO:0036444	MCU	0.161343733603521,1,12,23.9703947368421,"Calcium import into the mitochondrion "," http://amigo.geneontology.org/amigo/term/GO:0036444"," MCU"
0.161343733603521	8	1117	2060123450973	Regulation of transport	http://amigo.geneontology.org/amigo/term/GO:0051049	MCU KCNA10 PDCD5 PPP3R1 RAB27A PPP1R12A ARRB1 F2RL3	0.161343733603521,8,1117,2.060123450973,"Regulation of transport "," http://amigo.geneontology.org/amigo/term/GO:0051049"," MCU KCNA10 PDCD5 PPP3R1 RAB27A PPP1R12A ARRB1 F2RL3"
0.161343733603521	1	12	239703947368421	Pigment granule transport	http://amigo.geneontology.org/amigo/term/GO:0051904	RAB27A	0.161343733603521,1,12,23.9703947368421,"Pigment granule transport "," http://amigo.geneontology.org/amigo/term/GO:0051904"," RAB27A"
0.161343733603521	1	12	239703947368421	Regulation of histone H4 acetylation	http://amigo.geneontology.org/amigo/term/GO:0090239	ARRB1	0.161343733603521,1,12,23.9703947368421,"Regulation of histone H4 acetylation "," http://amigo.geneontology.org/amigo/term/GO:0090239"," ARRB1"
0.161343733603521	1	12	239703947368421	Positive regulation of ERAD pathway	http://amigo.geneontology.org/amigo/term/GO:1904294	SGTA	0.161343733603521,1,12,23.9703947368421,"Positive regulation of ERAD pathway "," http://amigo.geneontology.org/amigo/term/GO:1904294"," SGTA"
0.161343733603521	9	1327	195086859953199	Mitochondrion	http://amigo.geneontology.org/amigo/term/GO:0005739	MCU OGDH PMPCB GSR CLIC1 IDH2 HADHA HSD17B10 OPA1	0.161343733603521,9,1327,1.95086859953199,"Mitochondrion "," http://amigo.geneontology.org/amigo/term/GO:0005739"," MCU OGDH PMPCB GSR CLIC1 IDH2 HADHA HSD17B10 OPA1"
0.161343733603521	1	12	239703947368421	Ribonuclease P complex	http://amigo.geneontology.org/amigo/term/GO:0030677	HSD17B10	0.161343733603521,1,12,23.9703947368421,"Ribonuclease P complex "," http://amigo.geneontology.org/amigo/term/GO:0030677"," HSD17B10"
0.161343733603521	2	91	632186234817814	Bta-mir-296-5p target gene	https://www.mirnet.ca	RASA3 NAP1L4	0.161343733603521,2,91,6.32186234817814,"Bta-mir-296-5p target gene","https://www.mirnet.ca"," RASA3 NAP1L4"
0.16363631088619	2	93	618590831918506	Response to calcium ion	http://amigo.geneontology.org/amigo/term/GO:0051592	CPNE1 KCNMA1	0.16363631088619,2,93,6.18590831918506,"Response to calcium ion "," http://amigo.geneontology.org/amigo/term/GO:0051592"," CPNE1 KCNMA1"
0.16363631088619	2	93	618590831918506	Dilated cardiomyopathy	http://www.genome.jp/kegg-bin/show_pathway?bta05414	ACTC1 ITGA2B	0.16363631088619,2,93,6.18590831918506,"Dilated cardiomyopathy","http://www.genome.jp/kegg-bin/show_pathway?bta05414 "," ACTC1 ITGA2B"
0.16411974426251	3	221	390467968563944	Bta-mir-2454-3p target gene	https://www.mirnet.ca	LGALS3BP ATP6V1D SERPINB2	0.16411974426251,3,221,3.90467968563944,"Bta-mir-2454-3p target gene","https://www.mirnet.ca"," LGALS3BP ATP6V1D SERPINB2"
0.165538261400032	10	1554	185099573257468	Proteolysis	http://amigo.geneontology.org/amigo/term/GO:0006508	PSMB3 XPNPEP1 PMPCB CPNE1 PDCD5 ENO1 SGTA GSN ARRB1 SERPINB2	0.165538261400032,10,1554,1.85099573257468,"Proteolysis "," http://amigo.geneontology.org/amigo/term/GO:0006508"," PSMB3 XPNPEP1 PMPCB CPNE1 PDCD5 ENO1 SGTA GSN ARRB1 SERPINB2"
0.166110113396485	2	94	612010078387458	Potassium Channels	https://reactome.org/download/current	KCNA10 KCNMA1	0.166110113396485,2,94,6.12010078387458,"Potassium Channels","https://reactome.org/download/current"," KCNA10 KCNMA1"
0.166810507046259	1	13	221265182186235	FOXO-mediated transcription	https://reactome.org/download/current	YWHAZ	0.166810507046259,1,13,22.1265182186235,"FOXO-mediated transcription","https://reactome.org/download/current"," YWHAZ"
0.166810507046259	2	96	599259868421053	Rab regulation of trafficking	https://reactome.org/download/current	RAB27A RAB3GAP1	0.166810507046259,2,96,5.99259868421053,"Rab regulation of trafficking","https://reactome.org/download/current"," RAB27A RAB3GAP1"
0.166810507046259	1	13	221265182186235	Insertion of tail-anchored proteins into the endoplasmic reticulum membrane	https://reactome.org/download/current	SGTA	0.166810507046259,1,13,22.1265182186235,"Insertion of tail-anchored proteins into the endoplasmic reticulum membrane","https://reactome.org/download/current"," SGTA"
0.166810507046259	1	13	221265182186235	Vesicle coating	http://amigo.geneontology.org/amigo/term/GO:0006901	TFG	0.166810507046259,1,13,22.1265182186235,"Vesicle coating "," http://amigo.geneontology.org/amigo/term/GO:0006901"," TFG"
0.166810507046259	4	382	301198677321576	Heart development	http://amigo.geneontology.org/amigo/term/GO:0007507	ADAP2 ACTC1 PPP3R1 PDLIM1	0.166810507046259,4,382,3.01198677321576,"Heart development "," http://amigo.geneontology.org/amigo/term/GO:0007507"," ADAP2 ACTC1 PPP3R1 PDLIM1"
0.166810507046259	1	13	221265182186235	Branched-chain amino acid metabolic process	http://amigo.geneontology.org/amigo/term/GO:0009081	HSD17B10	0.166810507046259,1,13,22.1265182186235,"Branched-chain amino acid metabolic process "," http://amigo.geneontology.org/amigo/term/GO:0009081"," HSD17B10"
0.166810507046259	1	13	221265182186235	MRNA transcription	http://amigo.geneontology.org/amigo/term/GO:0009299	HIPK3	0.166810507046259,1,13,22.1265182186235,"MRNA transcription "," http://amigo.geneontology.org/amigo/term/GO:0009299"," HIPK3"
0.166810507046259	1	13	221265182186235	Hexose catabolic process	http://amigo.geneontology.org/amigo/term/GO:0019320	ENO1	0.166810507046259,1,13,22.1265182186235,"Hexose catabolic process "," http://amigo.geneontology.org/amigo/term/GO:0019320"," ENO1"
0.166810507046259	1	13	221265182186235	NAD metabolic process	http://amigo.geneontology.org/amigo/term/GO:0019674	ENO1	0.166810507046259,1,13,22.1265182186235,"NAD metabolic process "," http://amigo.geneontology.org/amigo/term/GO:0019674"," ENO1"
0.166810507046259	1	13	221265182186235	Adaptation of signaling pathway	http://amigo.geneontology.org/amigo/term/GO:0023058	ARRB1	0.166810507046259,1,13,22.1265182186235,"Adaptation of signaling pathway "," http://amigo.geneontology.org/amigo/term/GO:0023058"," ARRB1"
0.166810507046259	1	13	221265182186235	Melanosome localization	http://amigo.geneontology.org/amigo/term/GO:0032400	RAB27A	0.166810507046259,1,13,22.1265182186235,"Melanosome localization "," http://amigo.geneontology.org/amigo/term/GO:0032400"," RAB27A"
0.166810507046259	1	13	221265182186235	Establishment of melanosome localization	http://amigo.geneontology.org/amigo/term/GO:0032401	RAB27A	0.166810507046259,1,13,22.1265182186235,"Establishment of melanosome localization "," http://amigo.geneontology.org/amigo/term/GO:0032401"," RAB27A"
0.166810507046259	1	13	221265182186235	Regulation of integrin activation	http://amigo.geneontology.org/amigo/term/GO:0033623	PLEK	0.166810507046259,1,13,22.1265182186235,"Regulation of integrin activation "," http://amigo.geneontology.org/amigo/term/GO:0033623"," PLEK"
0.166810507046259	1	13	221265182186235	Modulation by host of viral genome replication	http://amigo.geneontology.org/amigo/term/GO:0044827	PPIB	0.166810507046259,1,13,22.1265182186235,"Modulation by host of viral genome replication "," http://amigo.geneontology.org/amigo/term/GO:0044827"," PPIB"
0.166810507046259	1	13	221265182186235	Regulation of megakaryocyte differentiation	http://amigo.geneontology.org/amigo/term/GO:0045652	GABPA	0.166810507046259,1,13,22.1265182186235,"Regulation of megakaryocyte differentiation "," http://amigo.geneontology.org/amigo/term/GO:0045652"," GABPA"
0.166810507046259	1	13	221265182186235	Protein insertion into mitochondrial membrane	http://amigo.geneontology.org/amigo/term/GO:0051204	PDCD5	0.166810507046259,1,13,22.1265182186235,"Protein insertion into mitochondrial membrane "," http://amigo.geneontology.org/amigo/term/GO:0051204"," PDCD5"
0.166810507046259	2	95	605567867036011	Protein depolymerization	http://amigo.geneontology.org/amigo/term/GO:0051261	PLEK GSN	0.166810507046259,2,95,6.05567867036011,"Protein depolymerization "," http://amigo.geneontology.org/amigo/term/GO:0051261"," PLEK GSN"
0.166810507046259	1	13	221265182186235	Attachment of mitotic spindle microtubules to kinetochore	http://amigo.geneontology.org/amigo/term/GO:0051315	SEH1L	0.166810507046259,1,13,22.1265182186235,"Attachment of mitotic spindle microtubules to kinetochore "," http://amigo.geneontology.org/amigo/term/GO:0051315"," SEH1L"
0.166810507046259	1	13	221265182186235	Pigment granule localization	http://amigo.geneontology.org/amigo/term/GO:0051875	RAB27A	0.166810507046259,1,13,22.1265182186235,"Pigment granule localization "," http://amigo.geneontology.org/amigo/term/GO:0051875"," RAB27A"
0.166810507046259	1	13	221265182186235	Establishment of pigment granule localization	http://amigo.geneontology.org/amigo/term/GO:0051905	RAB27A	0.166810507046259,1,13,22.1265182186235,"Establishment of pigment granule localization "," http://amigo.geneontology.org/amigo/term/GO:0051905"," RAB27A"
0.166810507046259	1	13	221265182186235	Cardiac myofibril assembly	http://amigo.geneontology.org/amigo/term/GO:0055003	ACTC1	0.166810507046259,1,13,22.1265182186235,"Cardiac myofibril assembly "," http://amigo.geneontology.org/amigo/term/GO:0055003"," ACTC1"
0.166810507046259	4	380	302783933518006	Regulation of anatomical structure size	http://amigo.geneontology.org/amigo/term/GO:0090066	GRB2 PLEK KCNMA1 GSN	0.166810507046259,4,380,3.02783933518006,"Regulation of anatomical structure size "," http://amigo.geneontology.org/amigo/term/GO:0090066"," GRB2 PLEK KCNMA1 GSN"
0.166810507046259	3	225	383526315789474	Regulation of actin filament organization	http://amigo.geneontology.org/amigo/term/GO:0110053	GRB2 PLEK GSN	0.166810507046259,3,225,3.83526315789474,"Regulation of actin filament organization "," http://amigo.geneontology.org/amigo/term/GO:0110053"," GRB2 PLEK GSN"
0.166810507046259	1	13	221265182186235	Cell junction disassembly	http://amigo.geneontology.org/amigo/term/GO:0150146	MAPRE2	0.166810507046259,1,13,22.1265182186235,"Cell junction disassembly "," http://amigo.geneontology.org/amigo/term/GO:0150146"," MAPRE2"
0.166810507046259	3	224	385238486842105	Mitochondrial matrix	http://amigo.geneontology.org/amigo/term/GO:0005759	PMPCB HADHA HSD17B10	0.166810507046259,3,224,3.85238486842105,"Mitochondrial matrix "," http://amigo.geneontology.org/amigo/term/GO:0005759"," PMPCB HADHA HSD17B10"
0.166810507046259	1	13	221265182186235	S100 protein binding	http://amigo.geneontology.org/amigo/term/GO:0044548	CACYBP	0.166810507046259,1,13,22.1265182186235,"S100 protein binding "," http://amigo.geneontology.org/amigo/term/GO:0044548"," CACYBP"
0.166810507046259	1	13	221265182186235	P00020 FAS signaling pathway	ftp://ftp.pantherdb.org/pathway/current_release	GSN	0.166810507046259,1,13,22.1265182186235,"P00020 FAS signaling pathway","ftp://ftp.pantherdb.org/pathway/current_release"," GSN"
0.171329182319555	4	386	298077447504772	Negative regulation of intracellular signal transduction	http://amigo.geneontology.org/amigo/term/GO:1902532	CPNE1 ENO1 OPA1 RASA3	0.171329182319555,4,386,2.98077447504772,"Negative regulation of intracellular signal transduction "," http://amigo.geneontology.org/amigo/term/GO:1902532"," CPNE1 ENO1 OPA1 RASA3"
0.172228818546245	1	14	205460526315789	Gastrin-CREB signalling pathway via PKC and MAPK	https://reactome.org/download/current	GRB2	0.172228818546245,1,14,20.5460526315789,"Gastrin-CREB signalling pathway via PKC and MAPK","https://reactome.org/download/current"," GRB2"
0.172228818546245	1	14	205460526315789	Regulation of KIT signaling	https://reactome.org/download/current	GRB2	0.172228818546245,1,14,20.5460526315789,"Regulation of KIT signaling","https://reactome.org/download/current"," GRB2"
0.172228818546245	1	14	205460526315789	Tie2 Signaling	https://reactome.org/download/current	GRB2	0.172228818546245,1,14,20.5460526315789,"Tie2 Signaling","https://reactome.org/download/current"," GRB2"
0.172228818546245	1	14	205460526315789	WP974 IL-9 Signaling Pathway	http://www.wikipathways.org/instance/WP974_r80917	GRB2	0.172228818546245,1,14,20.5460526315789,"WP974 IL-9 Signaling Pathway","http://www.wikipathways.org/instance/WP974_r80917"," GRB2"
0.172228818546245	1	14	205460526315789	Mitochondrial RNA processing	http://amigo.geneontology.org/amigo/term/GO:0000963	HSD17B10	0.172228818546245,1,14,20.5460526315789,"Mitochondrial RNA processing "," http://amigo.geneontology.org/amigo/term/GO:0000963"," HSD17B10"
0.172228818546245	1	14	205460526315789	IMP biosynthetic process	http://amigo.geneontology.org/amigo/term/GO:0006188	GART	0.172228818546245,1,14,20.5460526315789,"IMP biosynthetic process "," http://amigo.geneontology.org/amigo/term/GO:0006188"," GART"
0.172228818546245	10	1584	181593899521531	Movement of cell or subcellular component	http://amigo.geneontology.org/amigo/term/GO:0006928	WIPF1 MCU ACTC1 OGDH DYNLRB1 MAPRE2 CD9 PPIB GSN PRPF40A	0.172228818546245,10,1584,1.81593899521531,"Movement of cell or subcellular component "," http://amigo.geneontology.org/amigo/term/GO:0006928"," WIPF1 MCU ACTC1 OGDH DYNLRB1 MAPRE2 CD9 PPIB GSN PRPF40A"
0.172228818546245	1	14	205460526315789	Nuclear pore organization	http://amigo.geneontology.org/amigo/term/GO:0006999	SEH1L	0.172228818546245,1,14,20.5460526315789,"Nuclear pore organization "," http://amigo.geneontology.org/amigo/term/GO:0006999"," SEH1L"
0.172228818546245	1	14	205460526315789	Estrogen metabolic process	http://amigo.geneontology.org/amigo/term/GO:0008210	HSD17B10	0.172228818546245,1,14,20.5460526315789,"Estrogen metabolic process "," http://amigo.geneontology.org/amigo/term/GO:0008210"," HSD17B10"
0.172228818546245	2	100	575289473684211	Nucleoside diphosphate metabolic process	http://amigo.geneontology.org/amigo/term/GO:0009132	ALDOA ENO1	0.172228818546245,2,100,5.75289473684211,"Nucleoside diphosphate metabolic process "," http://amigo.geneontology.org/amigo/term/GO:0009132"," ALDOA ENO1"
0.172228818546245	1	14	205460526315789	Nucleobase biosynthesis	https://reactome.org/download/current	GART	0.172228818546245,1,14,20.5460526315789,"Nucleobase biosynthesis","https://reactome.org/download/current"," GART"
0.172228818546245	1	14	205460526315789	Forebrain neuron development	http://amigo.geneontology.org/amigo/term/GO:0021884	OGDH	0.172228818546245,1,14,20.5460526315789,"Forebrain neuron development "," http://amigo.geneontology.org/amigo/term/GO:0021884"," OGDH"
0.172228818546245	5	566	254103124418821	Regulation of proteolysis	http://amigo.geneontology.org/amigo/term/GO:0030162	PDCD5 ENO1 SGTA GSN SERPINB2	0.172228818546245,5,566,2.54103124418821,"Regulation of proteolysis "," http://amigo.geneontology.org/amigo/term/GO:0030162"," PDCD5 ENO1 SGTA GSN SERPINB2"
0.172228818546245	1	14	205460526315789	Cardiolipin metabolic process	http://amigo.geneontology.org/amigo/term/GO:0032048	HADHA	0.172228818546245,1,14,20.5460526315789,"Cardiolipin metabolic process "," http://amigo.geneontology.org/amigo/term/GO:0032048"," HADHA"
0.172228818546245	2	99	581100478468899	Regulation of protein-containing complex disassembly	http://amigo.geneontology.org/amigo/term/GO:0043244	PLEK GSN	0.172228818546245,2,99,5.81100478468899,"Regulation of protein-containing complex disassembly "," http://amigo.geneontology.org/amigo/term/GO:0043244"," PLEK GSN"
0.172228818546245	4	387	297307221542228	Positive regulation of cellular component biogenesis	http://amigo.geneontology.org/amigo/term/GO:0044089	GRB2 PLEK RAB3GAP1 GSN	0.172228818546245,4,387,2.97307221542228,"Positive regulation of cellular component biogenesis "," http://amigo.geneontology.org/amigo/term/GO:0044089"," GRB2 PLEK RAB3GAP1 GSN"
0.172228818546245	1	14	205460526315789	Keratinocyte migration	http://amigo.geneontology.org/amigo/term/GO:0051546	MAPRE2	0.172228818546245,1,14,20.5460526315789,"Keratinocyte migration "," http://amigo.geneontology.org/amigo/term/GO:0051546"," MAPRE2"
0.172228818546245	4	389	295778649709106	Organelle localization	http://amigo.geneontology.org/amigo/term/GO:0051640	PLEK SEH1L RAB27A TFG	0.172228818546245,4,389,2.95778649709106,"Organelle localization "," http://amigo.geneontology.org/amigo/term/GO:0051640"," PLEK SEH1L RAB27A TFG"
0.172228818546245	1	14	205460526315789	Endoplasmic reticulum tubular network organization	http://amigo.geneontology.org/amigo/term/GO:0071786	RAB3GAP1	0.172228818546245,1,14,20.5460526315789,"Endoplasmic reticulum tubular network organization "," http://amigo.geneontology.org/amigo/term/GO:0071786"," RAB3GAP1"
0.172228818546245	1	14	205460526315789	Establishment of protein localization to mitochondrial membrane	http://amigo.geneontology.org/amigo/term/GO:0090151	PDCD5	0.172228818546245,1,14,20.5460526315789,"Establishment of protein localization to mitochondrial membrane "," http://amigo.geneontology.org/amigo/term/GO:0090151"," PDCD5"
0.172228818546245	1	14	205460526315789	Negative regulation of release of cytochrome c from mitochondria	http://amigo.geneontology.org/amigo/term/GO:0090201	OPA1	0.172228818546245,1,14,20.5460526315789,"Negative regulation of release of cytochrome c from mitochondria "," http://amigo.geneontology.org/amigo/term/GO:0090201"," OPA1"
0.172228818546245	6	755	228591843848031	Cation transmembrane transport	http://amigo.geneontology.org/amigo/term/GO:0098655	MCU KCNA10 NOX5 KCNMA1 ATP6V1D F2RL3	0.172228818546245,6,755,2.28591843848031,"Cation transmembrane transport "," http://amigo.geneontology.org/amigo/term/GO:0098655"," MCU KCNA10 NOX5 KCNMA1 ATP6V1D F2RL3"
0.172228818546245	1	14	205460526315789	TRNA 5 -end processing	http://amigo.geneontology.org/amigo/term/GO:0099116	HSD17B10	0.172228818546245,1,14,20.5460526315789,"TRNA 5 -end processing "," http://amigo.geneontology.org/amigo/term/GO:0099116"," HSD17B10"
0.172228818546245	1	14	205460526315789	Positive regulation of protein depolymerization	http://amigo.geneontology.org/amigo/term/GO:1901881	PLEK	0.172228818546245,1,14,20.5460526315789,"Positive regulation of protein depolymerization "," http://amigo.geneontology.org/amigo/term/GO:1901881"," PLEK"
0.172228818546245	1	14	205460526315789	Protein disulfide isomerase activity	http://amigo.geneontology.org/amigo/term/GO:0003756	CRELD2	0.172228818546245,1,14,20.5460526315789,"Protein disulfide isomerase activity "," http://amigo.geneontology.org/amigo/term/GO:0003756"," CRELD2"
0.172228818546245	1	14	205460526315789	Threonine-type endopeptidase activity	http://amigo.geneontology.org/amigo/term/GO:0004298	PSMB3	0.172228818546245,1,14,20.5460526315789,"Threonine-type endopeptidase activity "," http://amigo.geneontology.org/amigo/term/GO:0004298"," PSMB3"
0.172228818546245	4	389	295778649709106	Phospholipid binding	http://amigo.geneontology.org/amigo/term/GO:0005543	ADAP2 CPNE1 OPA1 TLN1	0.172228818546245,4,389,2.95778649709106,"Phospholipid binding "," http://amigo.geneontology.org/amigo/term/GO:0005543"," ADAP2 CPNE1 OPA1 TLN1"
0.172228818546245	1	14	205460526315789	Intramolecular oxidoreductase activity, transposing S-S bonds	http://amigo.geneontology.org/amigo/term/GO:0016864	CRELD2	0.172228818546245,1,14,20.5460526315789,"Intramolecular oxidoreductase activity, transposing S-S bonds "," http://amigo.geneontology.org/amigo/term/GO:0016864"," CRELD2"
0.172228818546245	2	99	581100478468899	P00026 Heterotrimeric G-protein signaling pathway-Gi alpha and Gs alpha mediated pathway	ftp://ftp.pantherdb.org/pathway/current_release	PRKAR2A ARRB1	0.172228818546245,2,99,5.81100478468899,"P00026 Heterotrimeric G-protein signaling pathway-Gi alpha and Gs alpha mediated pathway","ftp://ftp.pantherdb.org/pathway/current_release"," PRKAR2A ARRB1"
0.172399292396516	8	1159	198546841651151	Negative regulation of response to stimulus	http://amigo.geneontology.org/amigo/term/GO:0048585	CPNE1 PLEK ENO1 CD9 SGTA OPA1 RASA3 ARRB1	0.172399292396516,8,1159,1.98546841651151,"Negative regulation of response to stimulus "," http://amigo.geneontology.org/amigo/term/GO:0048585"," CPNE1 PLEK ENO1 CD9 SGTA OPA1 RASA3 ARRB1"
0.174285632319601	2	101	569593538301199	Hematopoietic cell lineage	http://www.genome.jp/kegg-bin/show_pathway?bta04640	ITGA2B CD9	0.174285632319601,2,101,5.69593538301199,"Hematopoietic cell lineage","http://www.genome.jp/kegg-bin/show_pathway?bta04640 "," ITGA2B CD9"
0.176295640322694	8	1165	197524282810029	Vesicle-mediated transport	http://amigo.geneontology.org/amigo/term/GO:0016192	GRB2 PLEK PPP3R1 RAB27A CD9 TFG GSN ARRB1	0.176295640322694,8,1165,1.97524282810029,"Vesicle-mediated transport "," http://amigo.geneontology.org/amigo/term/GO:0016192"," GRB2 PLEK PPP3R1 RAB27A CD9 TFG GSN ARRB1"
0.176681985143628	2	102	564009287925697	Granulocyte migration	http://amigo.geneontology.org/amigo/term/GO:0097530	MCU PPIB	0.176681985143628,2,102,5.64009287925697,"Granulocyte migration "," http://amigo.geneontology.org/amigo/term/GO:0097530"," MCU PPIB"
0.176681985143628	2	102	564009287925697	Kinetochore	http://amigo.geneontology.org/amigo/term/GO:0000776	SEH1L PPP1R12A	0.176681985143628,2,102,5.64009287925697,"Kinetochore "," http://amigo.geneontology.org/amigo/term/GO:0000776"," SEH1L PPP1R12A"
0.176969457043534	2	104	553162955465587	Glycerophospholipid biosynthesis	https://reactome.org/download/current	CPNE1 HADHA	0.176969457043534,2,104,5.53162955465587,"Glycerophospholipid biosynthesis","https://reactome.org/download/current"," CPNE1 HADHA"
0.176969457043534	1	15	191763157894737	Rap1 signalling	https://reactome.org/download/current	YWHAZ	0.176969457043534,1,15,19.1763157894737,"Rap1 signalling","https://reactome.org/download/current"," YWHAZ"
0.176969457043534	1	15	191763157894737	Fertilization	https://reactome.org/download/current	CD9	0.176969457043534,1,15,19.1763157894737,"Fertilization","https://reactome.org/download/current"," CD9"
0.176969457043534	1	15	191763157894737	Reproduction	https://reactome.org/download/current	CD9	0.176969457043534,1,15,19.1763157894737,"Reproduction","https://reactome.org/download/current"," CD9"
0.176969457043534	1	15	191763157894737	GAB1 signalosome	https://reactome.org/download/current	GRB2	0.176969457043534,1,15,19.1763157894737,"GAB1 signalosome","https://reactome.org/download/current"," GRB2"
0.176969457043534	1	15	191763157894737	Microtubule-dependent trafficking of connexons from Golgi to the plasma membrane	https://reactome.org/download/current	TUBA4A	0.176969457043534,1,15,19.1763157894737,"Microtubule-dependent trafficking of connexons from Golgi to the plasma membrane","https://reactome.org/download/current"," TUBA4A"
0.176969457043534	1	15	191763157894737	Antigen activates B Cell Receptor BCR leading to generation of second messengers	https://reactome.org/download/current	GRB2	0.176969457043534,1,15,19.1763157894737,"Antigen activates B Cell Receptor BCR leading to generation of second messengers","https://reactome.org/download/current"," GRB2"
0.176969457043534	1	15	191763157894737	WP3149 TCA Cycle and Deficiency of Pyruvate Dehydrogenase complex (PDHc)	http://www.wikipathways.org/instance/WP3149_r87730	OGDH	0.176969457043534,1,15,19.1763157894737,"WP3149 TCA Cycle and Deficiency of Pyruvate Dehydrogenase complex (PDHc)","http://www.wikipathways.org/instance/WP3149_r87730"," OGDH"
0.176969457043534	1	15	191763157894737	Bile acid biosynthetic process	http://amigo.geneontology.org/amigo/term/GO:0006699	HSD17B10	0.176969457043534,1,15,19.1763157894737,"Bile acid biosynthetic process "," http://amigo.geneontology.org/amigo/term/GO:0006699"," HSD17B10"
0.176969457043534	1	15	191763157894737	Androgen metabolic process	http://amigo.geneontology.org/amigo/term/GO:0008209	HSD17B10	0.176969457043534,1,15,19.1763157894737,"Androgen metabolic process "," http://amigo.geneontology.org/amigo/term/GO:0008209"," HSD17B10"
0.176969457043534	2	103	558533469596321	Carbohydrate catabolic process	http://amigo.geneontology.org/amigo/term/GO:0016052	ALDOA ENO1	0.176969457043534,2,103,5.58533469596321,"Carbohydrate catabolic process "," http://amigo.geneontology.org/amigo/term/GO:0016052"," ALDOA ENO1"
0.176969457043534	1	15	191763157894737	Mitochondrial protein processing	http://amigo.geneontology.org/amigo/term/GO:0034982	PMPCB	0.176969457043534,1,15,19.1763157894737,"Mitochondrial protein processing "," http://amigo.geneontology.org/amigo/term/GO:0034982"," PMPCB"
0.176969457043534	1	15	191763157894737	Response to muscle stretch	http://amigo.geneontology.org/amigo/term/GO:0035994	GSN	0.176969457043534,1,15,19.1763157894737,"Response to muscle stretch "," http://amigo.geneontology.org/amigo/term/GO:0035994"," GSN"
0.176969457043534	1	15	191763157894737	Nucleobase biosynthetic process	http://amigo.geneontology.org/amigo/term/GO:0046112	GART	0.176969457043534,1,15,19.1763157894737,"Nucleobase biosynthetic process "," http://amigo.geneontology.org/amigo/term/GO:0046112"," GART"
0.176969457043534	1	15	191763157894737	Muscle cell cellular homeostasis	http://amigo.geneontology.org/amigo/term/GO:0046716	ALDOA	0.176969457043534,1,15,19.1763157894737,"Muscle cell cellular homeostasis "," http://amigo.geneontology.org/amigo/term/GO:0046716"," ALDOA"
0.176969457043534	3	239	36106033913235	Protein polymerization	http://amigo.geneontology.org/amigo/term/GO:0051258	GRB2 OPA1 GSN	0.176969457043534,3,239,3.6106033913235,"Protein polymerization "," http://amigo.geneontology.org/amigo/term/GO:0051258"," GRB2 OPA1 GSN"
0.176969457043534	3	238	362577399380805	Protein maturation	http://amigo.geneontology.org/amigo/term/GO:0051604	PMPCB ENO1 GSN	0.176969457043534,3,238,3.62577399380805,"Protein maturation "," http://amigo.geneontology.org/amigo/term/GO:0051604"," PMPCB ENO1 GSN"
0.176969457043534	1	15	191763157894737	Labyrinthine layer morphogenesis	http://amigo.geneontology.org/amigo/term/GO:0060713	GRB2	0.176969457043534,1,15,19.1763157894737,"Labyrinthine layer morphogenesis "," http://amigo.geneontology.org/amigo/term/GO:0060713"," GRB2"
0.176969457043534	1	15	191763157894737	TRNA threonylcarbamoyladenosine metabolic process	http://amigo.geneontology.org/amigo/term/GO:0070525	HSD17B10	0.176969457043534,1,15,19.1763157894737,"TRNA threonylcarbamoyladenosine metabolic process "," http://amigo.geneontology.org/amigo/term/GO:0070525"," HSD17B10"
0.176969457043534	1	15	191763157894737	Tail-anchored membrane protein insertion into ER membrane	http://amigo.geneontology.org/amigo/term/GO:0071816	SGTA	0.176969457043534,1,15,19.1763157894737,"Tail-anchored membrane protein insertion into ER membrane "," http://amigo.geneontology.org/amigo/term/GO:0071816"," SGTA"
0.176969457043534	1	15	191763157894737	Positive regulation of mitochondrial fission	http://amigo.geneontology.org/amigo/term/GO:0090141	MCU	0.176969457043534,1,15,19.1763157894737,"Positive regulation of mitochondrial fission "," http://amigo.geneontology.org/amigo/term/GO:0090141"," MCU"
0.176969457043534	3	237	36410726182545	Ion channel complex	http://amigo.geneontology.org/amigo/term/GO:0034702	MCU KCNA10 KCNMA1	0.176969457043534,3,237,3.6410726182545,"Ion channel complex "," http://amigo.geneontology.org/amigo/term/GO:0034702"," MCU KCNA10 KCNMA1"
0.176969457043534	6	764	225899007991182	Oxidoreductase activity	http://amigo.geneontology.org/amigo/term/GO:0016491	OGDH GSR NOX5 IDH2 HADHA HSD17B10	0.176969457043534,6,764,2.25899007991182,"Oxidoreductase activity "," http://amigo.geneontology.org/amigo/term/GO:0016491"," OGDH GSR NOX5 IDH2 HADHA HSD17B10"
0.176969457043534	1	15	191763157894737	Phosphatidic acid binding	http://amigo.geneontology.org/amigo/term/GO:0070300	OPA1	0.176969457043534,1,15,19.1763157894737,"Phosphatidic acid binding "," http://amigo.geneontology.org/amigo/term/GO:0070300"," OPA1"
0.176969457043534	1	15	191763157894737	NAD+ binding	http://amigo.geneontology.org/amigo/term/GO:0070403	HADHA	0.176969457043534,1,15,19.1763157894737,"NAD+ binding "," http://amigo.geneontology.org/amigo/term/GO:0070403"," HADHA"
0.176969457043534	1	15	191763157894737	Bta-mir-2463 target gene	https://www.mirnet.ca	ESD	0.176969457043534,1,15,19.1763157894737,"Bta-mir-2463 target gene","https://www.mirnet.ca"," ESD"
0.177325947792984	4	401	286927418296364	Cellular metal ion homeostasis	http://amigo.geneontology.org/amigo/term/GO:0006875	MCU NOX5 KCNMA1 F2RL3	0.177325947792984,4,401,2.86927418296364,"Cellular metal ion homeostasis "," http://amigo.geneontology.org/amigo/term/GO:0006875"," MCU NOX5 KCNMA1 F2RL3"
0.178101653635218	2	105	547894736842105	Telomere maintenance	http://amigo.geneontology.org/amigo/term/GO:0000723	CCT6A CCT2	0.178101653635218,2,105,5.47894736842105,"Telomere maintenance "," http://amigo.geneontology.org/amigo/term/GO:0000723"," CCT6A CCT2"
0.178101653635218	2	105	547894736842105	Ruffle	http://amigo.geneontology.org/amigo/term/GO:0001726	PLEK TLN1	0.178101653635218,2,105,5.47894736842105,"Ruffle "," http://amigo.geneontology.org/amigo/term/GO:0001726"," PLEK TLN1"
0.178101653635218	2	105	547894736842105	HIF-1 signaling pathway	http://www.genome.jp/kegg-bin/show_pathway?bta04066	ALDOA ENO1	0.178101653635218,2,105,5.47894736842105,"HIF-1 signaling pathway","http://www.genome.jp/kegg-bin/show_pathway?bta04066 "," ALDOA ENO1"
0.178101653635218	3	241	358063987770256	Endocytosis	http://www.genome.jp/kegg-bin/show_pathway?bta04144	WIPF1 ARRB1 HSPA1A	0.178101653635218,3,241,3.58063987770256,"Endocytosis","http://www.genome.jp/kegg-bin/show_pathway?bta04144 "," WIPF1 ARRB1 HSPA1A"
0.178101653635218	2	105	547894736842105	T cell receptor signaling pathway	http://www.genome.jp/kegg-bin/show_pathway?bta04660	GRB2 PPP3R1	0.178101653635218,2,105,5.47894736842105,"T cell receptor signaling pathway","http://www.genome.jp/kegg-bin/show_pathway?bta04660 "," GRB2 PPP3R1"
0.178101653635218	2	105	547894736842105	Bta-mir-2898 target gene	https://www.mirnet.ca	OGDH GART	0.178101653635218,2,105,5.47894736842105,"Bta-mir-2898 target gene","https://www.mirnet.ca"," OGDH GART"
0.178101653635218	2	105	547894736842105	P00034 Integrin signalling pathway	ftp://ftp.pantherdb.org/pathway/current_release	ACTC1 TLN1	0.178101653635218,2,105,5.47894736842105,"P00034 Integrin signalling pathway","ftp://ftp.pantherdb.org/pathway/current_release"," ACTC1 TLN1"
0.179574400641425	5	583	246693599350005	Inorganic cation transmembrane transporter activity	http://amigo.geneontology.org/amigo/term/GO:0022890	MCU KCNA10 NOX5 KCNMA1 ATP6V1D	0.179574400641425,5,583,2.46693599350005,"Inorganic cation transmembrane transporter activity "," http://amigo.geneontology.org/amigo/term/GO:0022890"," MCU KCNA10 NOX5 KCNMA1 ATP6V1D"
0.179574400641425	5	583	246693599350005	Bta-mir-2449 target gene	https://www.mirnet.ca	MYL9 ENO1 HADHA SGTA ARRB1	0.179574400641425,5,583,2.46693599350005,"Bta-mir-2449 target gene","https://www.mirnet.ca"," MYL9 ENO1 HADHA SGTA ARRB1"
0.179997212394586	2	106	54272591857001	Rho protein signal transduction	http://amigo.geneontology.org/amigo/term/GO:0007266	ARRB1 F2RL3	0.179997212394586,2,106,5.4272591857001,"Rho protein signal transduction "," http://amigo.geneontology.org/amigo/term/GO:0007266"," ARRB1 F2RL3"
0.179997212394586	2	106	54272591857001	Telomere organization	http://amigo.geneontology.org/amigo/term/GO:0032200	CCT6A CCT2	0.179997212394586,2,106,5.4272591857001,"Telomere organization "," http://amigo.geneontology.org/amigo/term/GO:0032200"," CCT6A CCT2"
0.179997212394586	2	106	54272591857001	Adherens junction	http://amigo.geneontology.org/amigo/term/GO:0005912	PDLIM1 TLN1	0.179997212394586,2,106,5.4272591857001,"Adherens junction "," http://amigo.geneontology.org/amigo/term/GO:0005912"," PDLIM1 TLN1"
0.180872997217437	2	107	537653713723561	Resolution of Sister Chromatid Cohesion	https://reactome.org/download/current	SEH1L TUBA4A	0.180872997217437,2,107,5.37653713723561,"Resolution of Sister Chromatid Cohesion","https://reactome.org/download/current"," SEH1L TUBA4A"
0.180872997217437	1	16	179777960526316	Transport of connexons to the plasma membrane	https://reactome.org/download/current	TUBA4A	0.180872997217437,1,16,17.9777960526316,"Transport of connexons to the plasma membrane","https://reactome.org/download/current"," TUBA4A"
0.180872997217437	1	16	179777960526316	SHC-mediated cascade:FGFR3	https://reactome.org/download/current	GRB2	0.180872997217437,1,16,17.9777960526316,"SHC-mediated cascade:FGFR3","https://reactome.org/download/current"," GRB2"
0.180872997217437	1	16	179777960526316	PKA-mediated phosphorylation of CREB	https://reactome.org/download/current	PRKAR2A	0.180872997217437,1,16,17.9777960526316,"PKA-mediated phosphorylation of CREB","https://reactome.org/download/current"," PRKAR2A"
0.180872997217437	1	16	179777960526316	PKA activation	https://reactome.org/download/current	PRKAR2A	0.180872997217437,1,16,17.9777960526316,"PKA activation","https://reactome.org/download/current"," PRKAR2A"
0.180872997217437	3	246	350786264441592	Sulfur compound metabolic process	http://amigo.geneontology.org/amigo/term/GO:0006790	OGDH GSR CLIC1	0.180872997217437,3,246,3.50786264441592,"Sulfur compound metabolic process "," http://amigo.geneontology.org/amigo/term/GO:0006790"," OGDH GSR CLIC1"
0.180872997217437	2	108	532675438596491	Striated muscle contraction	http://amigo.geneontology.org/amigo/term/GO:0006941	ALDOA GSN	0.180872997217437,2,108,5.32675438596491,"Striated muscle contraction "," http://amigo.geneontology.org/amigo/term/GO:0006941"," ALDOA GSN"
0.180872997217437	1	16	179777960526316	Fusion of sperm to egg plasma membrane involved in single fertilization	http://amigo.geneontology.org/amigo/term/GO:0007342	CD9	0.180872997217437,1,16,17.9777960526316,"Fusion of sperm to egg plasma membrane involved in single fertilization "," http://amigo.geneontology.org/amigo/term/GO:0007342"," CD9"
0.180872997217437	2	108	532675438596491	Bta-mir-423-3p target gene	https://www.mirnet.ca	IDH2 KRT78	0.180872997217437,2,108,5.32675438596491,"Bta-mir-423-3p target gene","https://www.mirnet.ca"," IDH2 KRT78"
0.180872997217437	2	108	532675438596491	Positive regulation of protein polymerization	http://amigo.geneontology.org/amigo/term/GO:0032273	GRB2 GSN	0.180872997217437,2,108,5.32675438596491,"Positive regulation of protein polymerization "," http://amigo.geneontology.org/amigo/term/GO:0032273"," GRB2 GSN"
0.180872997217437	1	16	179777960526316	NcRNA 5 -end processing	http://amigo.geneontology.org/amigo/term/GO:0034471	HSD17B10	0.180872997217437,1,16,17.9777960526316,"NcRNA 5 -end processing "," http://amigo.geneontology.org/amigo/term/GO:0034471"," HSD17B10"
0.180872997217437	1	16	179777960526316	IMP metabolic process	http://amigo.geneontology.org/amigo/term/GO:0046040	GART	0.180872997217437,1,16,17.9777960526316,"IMP metabolic process "," http://amigo.geneontology.org/amigo/term/GO:0046040"," GART"
0.180872997217437	1	16	179777960526316	Monosaccharide catabolic process	http://amigo.geneontology.org/amigo/term/GO:0046365	ENO1	0.180872997217437,1,16,17.9777960526316,"Monosaccharide catabolic process "," http://amigo.geneontology.org/amigo/term/GO:0046365"," ENO1"
0.180872997217437	1	16	179777960526316	Chaperone-mediated protein complex assembly	http://amigo.geneontology.org/amigo/term/GO:0051131	CCT2	0.180872997217437,1,16,17.9777960526316,"Chaperone-mediated protein complex assembly "," http://amigo.geneontology.org/amigo/term/GO:0051131"," CCT2"
0.180872997217437	4	408	282004643962848	Organophosphate biosynthetic process	http://amigo.geneontology.org/amigo/term/GO:0090407	GART PLEK ALDOA ENO1	0.180872997217437,4,408,2.82004643962848,"Organophosphate biosynthetic process "," http://amigo.geneontology.org/amigo/term/GO:0090407"," GART PLEK ALDOA ENO1"
0.180872997217437	1	16	179777960526316	Neurotransmitter receptor internalization	http://amigo.geneontology.org/amigo/term/GO:0099590	PPP3R1	0.180872997217437,1,16,17.9777960526316,"Neurotransmitter receptor internalization "," http://amigo.geneontology.org/amigo/term/GO:0099590"," PPP3R1"
0.180872997217437	1	16	179777960526316	Negative regulation of endoplasmic reticulum stress-induced intrinsic apoptotic signaling pathway	http://amigo.geneontology.org/amigo/term/GO:1902236	OPA1	0.180872997217437,1,16,17.9777960526316,"Negative regulation of endoplasmic reticulum stress-induced intrinsic apoptotic signaling pathway "," http://amigo.geneontology.org/amigo/term/GO:1902236"," OPA1"
0.180872997217437	1	16	179777960526316	Regulation of cAMP-dependent protein kinase activity	http://amigo.geneontology.org/amigo/term/GO:2000479	PRKAR2A	0.180872997217437,1,16,17.9777960526316,"Regulation of cAMP-dependent protein kinase activity "," http://amigo.geneontology.org/amigo/term/GO:2000479"," PRKAR2A"
0.180872997217437	1	16	179777960526316	Seh1-associated complex	http://amigo.geneontology.org/amigo/term/GO:0035859	SEH1L	0.180872997217437,1,16,17.9777960526316,"Seh1-associated complex "," http://amigo.geneontology.org/amigo/term/GO:0035859"," SEH1L"
0.180872997217437	1	16	179777960526316	U2-type prespliceosome	http://amigo.geneontology.org/amigo/term/GO:0071004	PRPF40A	0.180872997217437,1,16,17.9777960526316,"U2-type prespliceosome "," http://amigo.geneontology.org/amigo/term/GO:0071004"," PRPF40A"
0.180872997217437	1	16	179777960526316	Prespliceosome	http://amigo.geneontology.org/amigo/term/GO:0071010	PRPF40A	0.180872997217437,1,16,17.9777960526316,"Prespliceosome "," http://amigo.geneontology.org/amigo/term/GO:0071010"," PRPF40A"
0.180872997217437	1	16	179777960526316	Oxidoreductase activity, acting on NAD(P)H, oxygen as acceptor	http://amigo.geneontology.org/amigo/term/GO:0050664	NOX5	0.180872997217437,1,16,17.9777960526316,"Oxidoreductase activity, acting on NAD(P)H, oxygen as acceptor "," http://amigo.geneontology.org/amigo/term/GO:0050664"," NOX5"
0.180872997217437	1	16	179777960526316	Microtubule plus-end binding	http://amigo.geneontology.org/amigo/term/GO:0051010	MAPRE2	0.180872997217437,1,16,17.9777960526316,"Microtubule plus-end binding "," http://amigo.geneontology.org/amigo/term/GO:0051010"," MAPRE2"
0.181062684670521	5	590	243766726137377	Pyrophosphatase activity	http://amigo.geneontology.org/amigo/term/GO:0016462	CCT6A RAB27A CCT2 OPA1 TUBA4A	0.181062684670521,5,590,2.43766726137377,"Pyrophosphatase activity "," http://amigo.geneontology.org/amigo/term/GO:0016462"," CCT6A RAB27A CCT2 OPA1 TUBA4A"
0.183404147748355	2	109	527788507967166	WP1045 TGF beta Signaling Pathway	http://www.wikipathways.org/instance/WP1045_r90030	GRB2 PRKAR2A	0.183404147748355,2,109,5.27788507967166,"WP1045 TGF beta Signaling Pathway","http://www.wikipathways.org/instance/WP1045_r90030"," GRB2 PRKAR2A"
0.184713973467989	4	413	278590544157003	Bta-mir-2443 target gene	https://www.mirnet.ca	CPNE1 ENO1 IDH2 COTL1	0.184713973467989,4,413,2.78590544157003,"Bta-mir-2443 target gene","https://www.mirnet.ca"," CPNE1 ENO1 IDH2 COTL1"
0.184868552653332	1	17	169202786377709	NCAM signaling for neurite out-growth	https://reactome.org/download/current	GRB2	0.184868552653332,1,17,16.9202786377709,"NCAM signaling for neurite out-growth","https://reactome.org/download/current"," GRB2"
0.184868552653332	1	17	169202786377709	Branched-chain amino acid catabolism	https://reactome.org/download/current	HSD17B10	0.184868552653332,1,17,16.9202786377709,"Branched-chain amino acid catabolism","https://reactome.org/download/current"," HSD17B10"
0.184868552653332	1	17	169202786377709	Post NMDA receptor activation events	https://reactome.org/download/current	PRKAR2A	0.184868552653332,1,17,16.9202786377709,"Post NMDA receptor activation events","https://reactome.org/download/current"," PRKAR2A"
0.184868552653332	1	17	169202786377709	PI-3K cascade:FGFR3	https://reactome.org/download/current	GRB2	0.184868552653332,1,17,16.9202786377709,"PI-3K cascade:FGFR3","https://reactome.org/download/current"," GRB2"
0.184868552653332	1	17	169202786377709	WP989 Mitochondrial LC-Fatty Acid Beta-Oxidation	http://www.wikipathways.org/instance/WP989_r80896	HADHA	0.184868552653332,1,17,16.9202786377709,"WP989 Mitochondrial LC-Fatty Acid Beta-Oxidation","http://www.wikipathways.org/instance/WP989_r80896"," HADHA"
0.184868552653332	1	17	169202786377709	WP3134 Mitochondrial Gene Expression	http://www.wikipathways.org/instance/WP3134_r80692	GABPA	0.184868552653332,1,17,16.9202786377709,"WP3134 Mitochondrial Gene Expression","http://www.wikipathways.org/instance/WP3134_r80692"," GABPA"
0.184868552653332	1	17	169202786377709	Mitochondrial calcium ion transmembrane transport	http://amigo.geneontology.org/amigo/term/GO:0006851	MCU	0.184868552653332,1,17,16.9202786377709,"Mitochondrial calcium ion transmembrane transport "," http://amigo.geneontology.org/amigo/term/GO:0006851"," MCU"
0.184868552653332	2	110	52299043062201	Response to toxic substance	http://amigo.geneontology.org/amigo/term/GO:0009636	ESD GSR	0.184868552653332,2,110,5.2299043062201,"Response to toxic substance "," http://amigo.geneontology.org/amigo/term/GO:0009636"," ESD GSR"
0.184868552653332	7	991	203179935206331	Protein transport	http://amigo.geneontology.org/amigo/term/GO:0015031	YWHAZ MCU PMPCB PDCD5 PLEK PPP3R1 SEH1L	0.184868552653332,7,991,2.03179935206331,"Protein transport "," http://amigo.geneontology.org/amigo/term/GO:0015031"," YWHAZ MCU PMPCB PDCD5 PLEK PPP3R1 SEH1L"
0.184868552653332	1	17	169202786377709	Plasminogen activation	http://amigo.geneontology.org/amigo/term/GO:0031639	ENO1	0.184868552653332,1,17,16.9202786377709,"Plasminogen activation "," http://amigo.geneontology.org/amigo/term/GO:0031639"," ENO1"
0.184868552653332	7	990	203385167464115	Regulation of apoptotic process	http://amigo.geneontology.org/amigo/term/GO:0042981	ACTC1 PDCD5 KCNMA1 ENO1 HIPK3 OPA1 SERPINB2	0.184868552653332,7,990,2.03385167464115,"Regulation of apoptotic process "," http://amigo.geneontology.org/amigo/term/GO:0042981"," ACTC1 PDCD5 KCNMA1 ENO1 HIPK3 OPA1 SERPINB2"
0.184868552653332	2	111	51827880512091	Cellular protein complex disassembly	http://amigo.geneontology.org/amigo/term/GO:0043624	PLEK GSN	0.184868552653332,2,111,5.1827880512091,"Cellular protein complex disassembly "," http://amigo.geneontology.org/amigo/term/GO:0043624"," PLEK GSN"
0.184868552653332	1	17	169202786377709	Vesicle targeting, to, from or within Golgi	http://amigo.geneontology.org/amigo/term/GO:0048199	TFG	0.184868552653332,1,17,16.9202786377709,"Vesicle targeting, to, from or within Golgi "," http://amigo.geneontology.org/amigo/term/GO:0048199"," TFG"
0.184868552653332	2	110	52299043062201	Establishment of vesicle localization	http://amigo.geneontology.org/amigo/term/GO:0051650	RAB27A TFG	0.184868552653332,2,110,5.2299043062201,"Establishment of vesicle localization "," http://amigo.geneontology.org/amigo/term/GO:0051650"," RAB27A TFG"
0.184868552653332	1	17	169202786377709	Response to lipoprotein particle	http://amigo.geneontology.org/amigo/term/GO:0055094	CD9	0.184868552653332,1,17,16.9202786377709,"Response to lipoprotein particle "," http://amigo.geneontology.org/amigo/term/GO:0055094"," CD9"
0.184868552653332	1	17	169202786377709	Embryonic placenta morphogenesis	http://amigo.geneontology.org/amigo/term/GO:0060669	GRB2	0.184868552653332,1,17,16.9202786377709,"Embryonic placenta morphogenesis "," http://amigo.geneontology.org/amigo/term/GO:0060669"," GRB2"
0.184868552653332	1	17	169202786377709	Positive regulation of neutrophil chemotaxis	http://amigo.geneontology.org/amigo/term/GO:0090023	MCU	0.184868552653332,1,17,16.9202786377709,"Positive regulation of neutrophil chemotaxis "," http://amigo.geneontology.org/amigo/term/GO:0090023"," MCU"
0.184868552653332	1	17	169202786377709	Relaxation of muscle	http://amigo.geneontology.org/amigo/term/GO:0090075	GSN	0.184868552653332,1,17,16.9202786377709,"Relaxation of muscle "," http://amigo.geneontology.org/amigo/term/GO:0090075"," GSN"
0.184868552653332	3	249	346559923906151	Response to peptide	http://amigo.geneontology.org/amigo/term/GO:1901652	GRB2 PPP1R12A HADHA	0.184868552653332,3,249,3.46559923906151,"Response to peptide "," http://amigo.geneontology.org/amigo/term/GO:1901652"," GRB2 PPP1R12A HADHA"
0.184868552653332	1	17	169202786377709	Translation elongation factor activity	http://amigo.geneontology.org/amigo/term/GO:0003746	EEF1D	0.184868552653332,1,17,16.9202786377709,"Translation elongation factor activity "," http://amigo.geneontology.org/amigo/term/GO:0003746"," EEF1D"
0.184868552653332	5	599	24010412090326	Hydrolase activity, acting on acid anhydrides	http://amigo.geneontology.org/amigo/term/GO:0016817	CCT6A RAB27A CCT2 OPA1 TUBA4A	0.184868552653332,5,599,2.4010412090326,"Hydrolase activity, acting on acid anhydrides "," http://amigo.geneontology.org/amigo/term/GO:0016817"," CCT6A RAB27A CCT2 OPA1 TUBA4A"
0.184868552653332	5	599	24010412090326	Hydrolase activity, acting on acid anhydrides, in phosphorus-containing anhydrides	http://amigo.geneontology.org/amigo/term/GO:0016818	CCT6A RAB27A CCT2 OPA1 TUBA4A	0.184868552653332,5,599,2.4010412090326,"Hydrolase activity, acting on acid anhydrides, in phosphorus-containing anhydrides "," http://amigo.geneontology.org/amigo/term/GO:0016818"," CCT6A RAB27A CCT2 OPA1 TUBA4A"
0.184868552653332	1	17	169202786377709	Alpha-actinin binding	http://amigo.geneontology.org/amigo/term/GO:0051393	PDLIM1	0.184868552653332,1,17,16.9202786377709,"Alpha-actinin binding "," http://amigo.geneontology.org/amigo/term/GO:0051393"," PDLIM1"
0.184868552653332	1	17	169202786377709	14-3-3 protein binding	http://amigo.geneontology.org/amigo/term/GO:0071889	PPP1R12A	0.184868552653332,1,17,16.9202786377709,"14-3-3 protein binding "," http://amigo.geneontology.org/amigo/term/GO:0071889"," PPP1R12A"
0.184868552653332	3	250	345173684210526	Salmonella infection	http://www.genome.jp/kegg-bin/show_pathway?bta05132	DYNLRB1 MYL9 TUBA4A	0.184868552653332,3,250,3.45173684210526,"Salmonella infection","http://www.genome.jp/kegg-bin/show_pathway?bta05132 "," DYNLRB1 MYL9 TUBA4A"
0.18610594520843	2	112	513651315789474	Condensed chromosome, centromeric region	http://amigo.geneontology.org/amigo/term/GO:0000779	SEH1L PPP1R12A	0.18610594520843,2,112,5.13651315789474,"Condensed chromosome, centromeric region "," http://amigo.geneontology.org/amigo/term/GO:0000779"," SEH1L PPP1R12A"
0.18610594520843	2	112	513651315789474	Potassium channel activity	http://amigo.geneontology.org/amigo/term/GO:0005267	KCNA10 KCNMA1	0.18610594520843,2,112,5.13651315789474,"Potassium channel activity "," http://amigo.geneontology.org/amigo/term/GO:0005267"," KCNA10 KCNMA1"
0.187226376237281	7	999	201552868658132	Positive regulation of cellular protein metabolic process	http://amigo.geneontology.org/amigo/term/GO:0032270	PDCD5 ENO1 RAB3GAP1 PPP1R12A SGTA GSN ARRB1	0.187226376237281,7,999,2.01552868658132,"Positive regulation of cellular protein metabolic process "," http://amigo.geneontology.org/amigo/term/GO:0032270"," PDCD5 ENO1 RAB3GAP1 PPP1R12A SGTA GSN ARRB1"
0.18942245434794	2	114	504639889196676	Clathrin-mediated endocytosis	https://reactome.org/download/current	GRB2 ARRB1	0.18942245434794,2,114,5.04639889196676,"Clathrin-mediated endocytosis","https://reactome.org/download/current"," GRB2 ARRB1"
0.18942245434794	1	18	159802631578947	FRS-mediated FGFR3 signaling	https://reactome.org/download/current	GRB2	0.18942245434794,1,18,15.9802631578947,"FRS-mediated FGFR3 signaling","https://reactome.org/download/current"," GRB2"
0.18942245434794	1	18	159802631578947	SHC-mediated cascade:FGFR4	https://reactome.org/download/current	GRB2	0.18942245434794,1,18,15.9802631578947,"SHC-mediated cascade:FGFR4","https://reactome.org/download/current"," GRB2"
0.18942245434794	1	18	159802631578947	TGF-beta receptor signaling activates SMADs	https://reactome.org/download/current	FKBP1A	0.18942245434794,1,18,15.9802631578947,"TGF-beta receptor signaling activates SMADs","https://reactome.org/download/current"," FKBP1A"
0.18942245434794	1	18	159802631578947	Mitochondrial genome maintenance	http://amigo.geneontology.org/amigo/term/GO:0000002	OPA1	0.18942245434794,1,18,15.9802631578947,"Mitochondrial genome maintenance "," http://amigo.geneontology.org/amigo/term/GO:0000002"," OPA1"
0.18942245434794	1	18	159802631578947	RNA 5 -end processing	http://amigo.geneontology.org/amigo/term/GO:0000966	HSD17B10	0.18942245434794,1,18,15.9802631578947,"RNA 5 -end processing "," http://amigo.geneontology.org/amigo/term/GO:0000966"," HSD17B10"
0.18942245434794	1	18	159802631578947	Positive regulation of receptor internalization	http://amigo.geneontology.org/amigo/term/GO:0002092	ARRB1	0.18942245434794,1,18,15.9802631578947,"Positive regulation of receptor internalization "," http://amigo.geneontology.org/amigo/term/GO:0002092"," ARRB1"
0.18942245434794	2	115	50025171624714	Regulation of cell shape	http://amigo.geneontology.org/amigo/term/GO:0008360	ALDOA PRPF40A	0.18942245434794,2,115,5.0025171624714,"Regulation of cell shape "," http://amigo.geneontology.org/amigo/term/GO:0008360"," ALDOA PRPF40A"
0.18942245434794	1	18	159802631578947	Subpallium development	http://amigo.geneontology.org/amigo/term/GO:0021544	OGDH	0.18942245434794,1,18,15.9802631578947,"Subpallium development "," http://amigo.geneontology.org/amigo/term/GO:0021544"," OGDH"
0.18942245434794	1	18	159802631578947	ARF protein signal transduction	http://amigo.geneontology.org/amigo/term/GO:0032011	MAPRE2	0.18942245434794,1,18,15.9802631578947,"ARF protein signal transduction "," http://amigo.geneontology.org/amigo/term/GO:0032011"," MAPRE2"
0.18942245434794	1	18	159802631578947	Regulation of ARF protein signal transduction	http://amigo.geneontology.org/amigo/term/GO:0032012	MAPRE2	0.18942245434794,1,18,15.9802631578947,"Regulation of ARF protein signal transduction "," http://amigo.geneontology.org/amigo/term/GO:0032012"," MAPRE2"
0.18942245434794	1	18	159802631578947	Regulation of nuclease activity	http://amigo.geneontology.org/amigo/term/GO:0032069	OAS1Z	0.18942245434794,1,18,15.9802631578947,"Regulation of nuclease activity "," http://amigo.geneontology.org/amigo/term/GO:0032069"," OAS1Z"
0.18942245434794	4	422	272649039660763	Monocarboxylic acid metabolic process	http://amigo.geneontology.org/amigo/term/GO:0032787	ALDOA ENO1 HADHA HSD17B10	0.18942245434794,4,422,2.72649039660763,"Monocarboxylic acid metabolic process "," http://amigo.geneontology.org/amigo/term/GO:0032787"," ALDOA ENO1 HADHA HSD17B10"
0.18942245434794	1	18	159802631578947	Inositol phosphate biosynthetic process	http://amigo.geneontology.org/amigo/term/GO:0032958	PLEK	0.18942245434794,1,18,15.9802631578947,"Inositol phosphate biosynthetic process "," http://amigo.geneontology.org/amigo/term/GO:0032958"," PLEK"
0.18942245434794	1	18	159802631578947	Protein insertion into ER membrane	http://amigo.geneontology.org/amigo/term/GO:0045048	SGTA	0.18942245434794,1,18,15.9802631578947,"Protein insertion into ER membrane "," http://amigo.geneontology.org/amigo/term/GO:0045048"," SGTA"
0.18942245434794	1	18	159802631578947	GTP metabolic process	http://amigo.geneontology.org/amigo/term/GO:0046039	OPA1	0.18942245434794,1,18,15.9802631578947,"GTP metabolic process "," http://amigo.geneontology.org/amigo/term/GO:0046039"," OPA1"
0.18942245434794	2	114	504639889196676	Membrane fusion	http://amigo.geneontology.org/amigo/term/GO:0061025	CD9 OPA1	0.18942245434794,2,114,5.04639889196676,"Membrane fusion "," http://amigo.geneontology.org/amigo/term/GO:0061025"," CD9 OPA1"
0.18942245434794	1	18	159802631578947	Cellular response to lipoprotein particle stimulus	http://amigo.geneontology.org/amigo/term/GO:0071402	CD9	0.18942245434794,1,18,15.9802631578947,"Cellular response to lipoprotein particle stimulus "," http://amigo.geneontology.org/amigo/term/GO:0071402"," CD9"
0.18942245434794	1	18	159802631578947	Positive regulation of release of cytochrome c from mitochondria	http://amigo.geneontology.org/amigo/term/GO:0090200	PDCD5	0.18942245434794,1,18,15.9802631578947,"Positive regulation of release of cytochrome c from mitochondria "," http://amigo.geneontology.org/amigo/term/GO:0090200"," PDCD5"
0.18942245434794	1	18	159802631578947	Regulation of platelet aggregation	http://amigo.geneontology.org/amigo/term/GO:0090330	CD9	0.18942245434794,1,18,15.9802631578947,"Regulation of platelet aggregation "," http://amigo.geneontology.org/amigo/term/GO:0090330"," CD9"
0.18942245434794	1	18	159802631578947	Positive regulation of TORC1 signaling	http://amigo.geneontology.org/amigo/term/GO:1904263	SEH1L	0.18942245434794,1,18,15.9802631578947,"Positive regulation of TORC1 signaling "," http://amigo.geneontology.org/amigo/term/GO:1904263"," SEH1L"
0.18942245434794	1	18	159802631578947	Glycolipid binding	http://amigo.geneontology.org/amigo/term/GO:0051861	MANF	0.18942245434794,1,18,15.9802631578947,"Glycolipid binding "," http://amigo.geneontology.org/amigo/term/GO:0051861"," MANF"
0.18942245434794	1	18	159802631578947	Threonine-type peptidase activity	http://amigo.geneontology.org/amigo/term/GO:0070003	PSMB3	0.18942245434794,1,18,15.9802631578947,"Threonine-type peptidase activity "," http://amigo.geneontology.org/amigo/term/GO:0070003"," PSMB3"
0.18942245434794	1	18	159802631578947	One carbon pool by folate	http://www.genome.jp/kegg-bin/show_pathway?bta00670	GART	0.18942245434794,1,18,15.9802631578947,"One carbon pool by folate","http://www.genome.jp/kegg-bin/show_pathway?bta00670 "," GART"
0.192104778172615	2	116	495939201451906	Oocyte meiosis	http://www.genome.jp/kegg-bin/show_pathway?bta04114	YWHAZ PPP3R1	0.192104778172615,2,116,4.95939201451906,"Oocyte meiosis","http://www.genome.jp/kegg-bin/show_pathway?bta04114 "," YWHAZ PPP3R1"
0.194796245301518	2	117	4917004048583	P00031 Inflammation mediated by chemokine and cytokine signaling pathway	ftp://ftp.pantherdb.org/pathway/current_release	ACTC1 ARRB1	0.194796245301518,2,117,4.917004048583,"P00031 Inflammation mediated by chemokine and cytokine signaling pathway","ftp://ftp.pantherdb.org/pathway/current_release"," ACTC1 ARRB1"
0.194933672928896	4	432	266337719298246	Cytokine Signaling in Immune system	https://reactome.org/download/current	YWHAZ GRB2 RASA3 ARRB1	0.194933672928896,4,432,2.66337719298246,"Cytokine Signaling in Immune system","https://reactome.org/download/current"," YWHAZ GRB2 RASA3 ARRB1"
0.194933672928896	1	19	151391966759003	Regulation of signaling by CBL	https://reactome.org/download/current	GRB2	0.194933672928896,1,19,15.1391966759003,"Regulation of signaling by CBL","https://reactome.org/download/current"," GRB2"
0.194933672928896	1	19	151391966759003	SHC-mediated cascade:FGFR1	https://reactome.org/download/current	GRB2	0.194933672928896,1,19,15.1391966759003,"SHC-mediated cascade:FGFR1","https://reactome.org/download/current"," GRB2"
0.194933672928896	1	19	151391966759003	PI-3K cascade:FGFR4	https://reactome.org/download/current	GRB2	0.194933672928896,1,19,15.1391966759003,"PI-3K cascade:FGFR4","https://reactome.org/download/current"," GRB2"
0.194933672928896	1	19	151391966759003	Lipid droplet organization	http://amigo.geneontology.org/amigo/term/GO:0034389	RAB3GAP1	0.194933672928896,1,19,15.1391966759003,"Lipid droplet organization "," http://amigo.geneontology.org/amigo/term/GO:0034389"," RAB3GAP1"
0.194933672928896	5	618	232722278998467	Negative regulation of apoptotic process	http://amigo.geneontology.org/amigo/term/GO:0043066	ACTC1 ENO1 HIPK3 OPA1 SERPINB2	0.194933672928896,5,618,2.32722278998467,"Negative regulation of apoptotic process "," http://amigo.geneontology.org/amigo/term/GO:0043066"," ACTC1 ENO1 HIPK3 OPA1 SERPINB2"
0.194933672928896	7	1017	197985561248253	Regulation of programmed cell death	http://amigo.geneontology.org/amigo/term/GO:0043067	ACTC1 PDCD5 KCNMA1 ENO1 HIPK3 OPA1 SERPINB2	0.194933672928896,7,1017,1.97985561248253,"Regulation of programmed cell death "," http://amigo.geneontology.org/amigo/term/GO:0043067"," ACTC1 PDCD5 KCNMA1 ENO1 HIPK3 OPA1 SERPINB2"
0.194933672928896	1	19	151391966759003	Plasma membrane fusion	http://amigo.geneontology.org/amigo/term/GO:0045026	CD9	0.194933672928896,1,19,15.1391966759003,"Plasma membrane fusion "," http://amigo.geneontology.org/amigo/term/GO:0045026"," CD9"
0.194933672928896	1	19	151391966759003	Positive regulation of granulocyte chemotaxis	http://amigo.geneontology.org/amigo/term/GO:0071624	MCU	0.194933672928896,1,19,15.1391966759003,"Positive regulation of granulocyte chemotaxis "," http://amigo.geneontology.org/amigo/term/GO:0071624"," MCU"
0.194933672928896	1	19	151391966759003	Negative regulation of NIK/NF-kappaB signaling	http://amigo.geneontology.org/amigo/term/GO:1901223	CPNE1	0.194933672928896,1,19,15.1391966759003,"Negative regulation of NIK/NF-kappaB signaling "," http://amigo.geneontology.org/amigo/term/GO:1901223"," CPNE1"
0.194933672928896	1	19	151391966759003	Regulation of ERAD pathway	http://amigo.geneontology.org/amigo/term/GO:1904292	SGTA	0.194933672928896,1,19,15.1391966759003,"Regulation of ERAD pathway "," http://amigo.geneontology.org/amigo/term/GO:1904292"," SGTA"
0.194933672928896	1	19	151391966759003	Cytoplasmic dynein complex	http://amigo.geneontology.org/amigo/term/GO:0005868	DYNLRB1	0.194933672928896,1,19,15.1391966759003,"Cytoplasmic dynein complex "," http://amigo.geneontology.org/amigo/term/GO:0005868"," DYNLRB1"
0.194933672928896	7	1016	198180428926647	Microtubule cytoskeleton	http://amigo.geneontology.org/amigo/term/GO:0015630	DYNLRB1 MAPRE2 CCT6A PRKAR2A PPP1R12A CCT2 TUBA4A	0.194933672928896,7,1016,1.98180428926647,"Microtubule cytoskeleton "," http://amigo.geneontology.org/amigo/term/GO:0015630"," DYNLRB1 MAPRE2 CCT6A PRKAR2A PPP1R12A CCT2 TUBA4A"
0.194933672928896	1	19	151391966759003	A band	http://amigo.geneontology.org/amigo/term/GO:0031672	PPP1R12A	0.194933672928896,1,19,15.1391966759003,"A band "," http://amigo.geneontology.org/amigo/term/GO:0031672"," PPP1R12A"
0.194933672928896	1	19	151391966759003	Endoplasmic reticulum tubular network	http://amigo.geneontology.org/amigo/term/GO:0071782	RAB3GAP1	0.194933672928896,1,19,15.1391966759003,"Endoplasmic reticulum tubular network "," http://amigo.geneontology.org/amigo/term/GO:0071782"," RAB3GAP1"
0.194933672928896	6	815	211762996448176	Ion transmembrane transporter activity	http://amigo.geneontology.org/amigo/term/GO:0015075	MCU KCNA10 NOX5 KCNMA1 CLIC1 ATP6V1D	0.194933672928896,6,815,2.11762996448176,"Ion transmembrane transporter activity "," http://amigo.geneontology.org/amigo/term/GO:0015075"," MCU KCNA10 NOX5 KCNMA1 CLIC1 ATP6V1D"
0.194933672928896	1	19	151391966759003	Syntaxin-1 binding	http://amigo.geneontology.org/amigo/term/GO:0017075	SYPL1	0.194933672928896,1,19,15.1391966759003,"Syntaxin-1 binding "," http://amigo.geneontology.org/amigo/term/GO:0017075"," SYPL1"
0.194933672928896	1	19	151391966759003	2-Oxocarboxylic acid metabolism	http://www.genome.jp/kegg-bin/show_pathway?bta01210	IDH2	0.194933672928896,1,19,15.1391966759003,"2-Oxocarboxylic acid metabolism","http://www.genome.jp/kegg-bin/show_pathway?bta01210 "," IDH2"
0.194933672928896	1	19	151391966759003	P04386 Histamine H2 receptor mediated signaling pathway	ftp://ftp.pantherdb.org/pathway/current_release	PRKAR2A	0.194933672928896,1,19,15.1391966759003,"P04386 Histamine H2 receptor mediated signaling pathway","ftp://ftp.pantherdb.org/pathway/current_release"," PRKAR2A"
0.195771696583492	2	119	48343653250774	WP1062 Regulation of Actin Cytoskeleton	http://www.wikipathways.org/instance/WP1062_r80894	PPP1R12A GSN	0.195771696583492,2,119,4.8343653250774,"WP1062 Regulation of Actin Cytoskeleton","http://www.wikipathways.org/instance/WP1062_r80894"," PPP1R12A GSN"
0.195771696583492	2	119	48343653250774	Actin filament bundle assembly	http://amigo.geneontology.org/amigo/term/GO:0051017	PLEK ARRB1	0.195771696583492,2,119,4.8343653250774,"Actin filament bundle assembly "," http://amigo.geneontology.org/amigo/term/GO:0051017"," PLEK ARRB1"
0.195771696583492	2	119	48343653250774	Vesicle localization	http://amigo.geneontology.org/amigo/term/GO:0051648	RAB27A TFG	0.195771696583492,2,119,4.8343653250774,"Vesicle localization "," http://amigo.geneontology.org/amigo/term/GO:0051648"," RAB27A TFG"
0.195912449495117	5	620	23197156196944	Lipid binding	http://amigo.geneontology.org/amigo/term/GO:0008289	ADAP2 CPNE1 OPA1 TLN1 MANF	0.195912449495117,5,620,2.3197156196944,"Lipid binding "," http://amigo.geneontology.org/amigo/term/GO:0008289"," ADAP2 CPNE1 OPA1 TLN1 MANF"
0.196202518299462	3	265	325635551142006	RNA splicing, via transesterification reactions	http://amigo.geneontology.org/amigo/term/GO:0000375	U2AF1 PUF60 PRPF40A	0.196202518299462,3,265,3.25635551142006,"RNA splicing, via transesterification reactions "," http://amigo.geneontology.org/amigo/term/GO:0000375"," U2AF1 PUF60 PRPF40A"
0.196202518299462	3	265	325635551142006	RNA splicing, via transesterification reactions with bulged adenosine as nucleophile	http://amigo.geneontology.org/amigo/term/GO:0000377	U2AF1 PUF60 PRPF40A	0.196202518299462,3,265,3.25635551142006,"RNA splicing, via transesterification reactions with bulged adenosine as nucleophile "," http://amigo.geneontology.org/amigo/term/GO:0000377"," U2AF1 PUF60 PRPF40A"
0.196202518299462	3	265	325635551142006	MRNA splicing, via spliceosome	http://amigo.geneontology.org/amigo/term/GO:0000398	U2AF1 PUF60 PRPF40A	0.196202518299462,3,265,3.25635551142006,"MRNA splicing, via spliceosome "," http://amigo.geneontology.org/amigo/term/GO:0000398"," U2AF1 PUF60 PRPF40A"
0.197560202681972	2	120	479407894736842	RHO GTPases Activate Formins	https://reactome.org/download/current	SEH1L TUBA4A	0.197560202681972,2,120,4.79407894736842,"RHO GTPases Activate Formins","https://reactome.org/download/current"," SEH1L TUBA4A"
0.199740304344384	1	20	143822368421053	PI-3K cascade:FGFR1	https://reactome.org/download/current	GRB2	0.199740304344384,1,20,14.3822368421053,"PI-3K cascade:FGFR1","https://reactome.org/download/current"," GRB2"
0.199740304344384	1	20	143822368421053	SHC-mediated cascade:FGFR2	https://reactome.org/download/current	GRB2	0.199740304344384,1,20,14.3822368421053,"SHC-mediated cascade:FGFR2","https://reactome.org/download/current"," GRB2"
0.199740304344384	1	20	143822368421053	FRS-mediated FGFR4 signaling	https://reactome.org/download/current	GRB2	0.199740304344384,1,20,14.3822368421053,"FRS-mediated FGFR4 signaling","https://reactome.org/download/current"," GRB2"
0.199740304344384	1	20	143822368421053	WP996 EPO Receptor Signaling	http://www.wikipathways.org/instance/WP996_r80789	GRB2	0.199740304344384,1,20,14.3822368421053,"WP996 EPO Receptor Signaling","http://www.wikipathways.org/instance/WP996_r80789"," GRB2"
0.199740304344384	1	20	143822368421053	Purine nucleobase metabolic process	http://amigo.geneontology.org/amigo/term/GO:0006144	GART	0.199740304344384,1,20,14.3822368421053,"Purine nucleobase metabolic process "," http://amigo.geneontology.org/amigo/term/GO:0006144"," GART"
0.199740304344384	1	20	143822368421053	Myelination in peripheral nervous system	http://amigo.geneontology.org/amigo/term/GO:0022011	PPP3R1	0.199740304344384,1,20,14.3822368421053,"Myelination in peripheral nervous system "," http://amigo.geneontology.org/amigo/term/GO:0022011"," PPP3R1"
0.199740304344384	2	121	475445846020009	Regulation of endocytosis	http://amigo.geneontology.org/amigo/term/GO:0030100	PPP3R1 ARRB1	0.199740304344384,2,121,4.75445846020009,"Regulation of endocytosis "," http://amigo.geneontology.org/amigo/term/GO:0030100"," PPP3R1 ARRB1"
0.199740304344384	1	20	143822368421053	Peripheral nervous system axon ensheathment	http://amigo.geneontology.org/amigo/term/GO:0032292	PPP3R1	0.199740304344384,1,20,14.3822368421053,"Peripheral nervous system axon ensheathment "," http://amigo.geneontology.org/amigo/term/GO:0032292"," PPP3R1"
0.199740304344384	1	20	143822368421053	Cellular protein-containing complex localization	http://amigo.geneontology.org/amigo/term/GO:0034629	SEH1L	0.199740304344384,1,20,14.3822368421053,"Cellular protein-containing complex localization "," http://amigo.geneontology.org/amigo/term/GO:0034629"," SEH1L"
0.199740304344384	1	20	143822368421053	MRNA cis splicing, via spliceosome	http://amigo.geneontology.org/amigo/term/GO:0045292	PRPF40A	0.199740304344384,1,20,14.3822368421053,"MRNA cis splicing, via spliceosome "," http://amigo.geneontology.org/amigo/term/GO:0045292"," PRPF40A"
0.199740304344384	3	268	321990377062058	Leukocyte migration	http://amigo.geneontology.org/amigo/term/GO:0050900	MCU CD9 PPIB	0.199740304344384,3,268,3.21990377062058,"Leukocyte migration "," http://amigo.geneontology.org/amigo/term/GO:0050900"," MCU CD9 PPIB"
0.199740304344384	2	121	475445846020009	Actin filament bundle organization	http://amigo.geneontology.org/amigo/term/GO:0061572	PLEK ARRB1	0.199740304344384,2,121,4.75445846020009,"Actin filament bundle organization "," http://amigo.geneontology.org/amigo/term/GO:0061572"," PLEK ARRB1"
0.199740304344384	1	20	143822368421053	Regulation of mitochondrial fission	http://amigo.geneontology.org/amigo/term/GO:0090140	MCU	0.199740304344384,1,20,14.3822368421053,"Regulation of mitochondrial fission "," http://amigo.geneontology.org/amigo/term/GO:0090140"," MCU"
0.199740304344384	1	20	143822368421053	Sperm head	http://amigo.geneontology.org/amigo/term/GO:0061827	ALDOA	0.199740304344384,1,20,14.3822368421053,"Sperm head "," http://amigo.geneontology.org/amigo/term/GO:0061827"," ALDOA"
0.199740304344384	1	20	143822368421053	Proton channel activity	http://amigo.geneontology.org/amigo/term/GO:0015252	NOX5	0.199740304344384,1,20,14.3822368421053,"Proton channel activity "," http://amigo.geneontology.org/amigo/term/GO:0015252"," NOX5"
0.19981494125102	2	122	471548748921484	Tube formation	http://amigo.geneontology.org/amigo/term/GO:0035148	YWHAZ OPA1	0.19981494125102,2,122,4.71548748921484,"Tube formation "," http://amigo.geneontology.org/amigo/term/GO:0035148"," YWHAZ OPA1"
