# Supplementary material for: Mycobacterium avium subsp. paratuberculosis Infected Cows Reveal Divergent Immune Response in Bovine Peripheral Blood Derived Lymphocyte Proteome
Source: Metabolites. 2022 Sep 29;12(10):924. doi: 10.3390/metabo12100924 (PMC9608910; doi:10.3390/metabo12100924)
Supplement: Supplementary file 1 [file metabolites-12-00924-s001.zip › Supplementary Table S5_Korbonits et al.xlsx]

## Sheet: Tabelle1
Number	age (in years)	Farm A/B	Group
negative 01	6	A	negative
negative 02	5	A	negative
negative 03	5	A	negative
negative 04	4	A	negative
negative 05	4	A	negative
negative 06	4	A	negative
negative 07	4	A	negative
negative 08	3	A	negative
negative 09	not available	A	negative
negative 10	4	B	negative
negative 11	5	B	negative
positive 01	4	A	positive
positive 02	4	A	positive
positive 03	4	A	positive
positive 04	4	A	positive
positive 05	4	A	positive
positive 06	5	B	positive
positive 07	5	B	positive
not assigned 01	7	A	could not be assigned
not assigned 02	7	A	could not be assigned
not assigned 03	6	A	could not be assigned
not assigned 04	6	A	could not be assigned
not assigned 05	5	A	could not be assigned
not assigned 06	5	A	could not be assigned
not assigned 07	5	A	could not be assigned
not assigned 08	5	A	could not be assigned
not assigned 09	4	A	could not be assigned
not assigned 10	4	A	could not be assigned
not assigned 11	4	A	could not be assigned
not assigned 12	4	A	could not be assigned
not assigned 13	4	A	could not be assigned
not assigned 14	3	A	could not be assigned
not assigned 15	3	A	could not be assigned
not assigned 16	3	A	could not be assigned
not assigned 17	not available	A	could not be assigned
